# Supplementary material for: A novel genome-wide association approach reveals wheat pathogen genes involved in host specialization
Source: Research Square preprint supplement (doi:10.21203/rs.3.rs-4486034/v1), 2024-06-04
Supplement: Supplementary file 1 [file 1c327ff6ab6c6dcebf95ebdd.xlsx]

## Sheet: Table S4
Table S4: Microsatellite loci summary statistics.
Locus	No. Alleles	1-D	Hexp	Evenness
ST1	7	0.298824	0.29898	0.609978
ST4	15	0.644865	0.645203	0.769146
ST5	6	0.175304	0.175396	0.42642
ST9	10	0.421833	0.422054	0.540037
ST10	11	0.722051	0.722429	0.738386
ST13	11	0.674161	0.674514	0.694056
ST12	11	0.439441	0.439671	0.589461
ST3B	18	0.745385	0.745775	0.759441
ST2	11	0.518577	0.518848	0.51176
ST3C	15	0.552362	0.552652	0.655076
ST6	13	0.24091	0.241036	0.394207
ST7	21	0.665549	0.665897	0.605382
mean	12.4167	0.508272	0.508538	0.607779
No. alleles: Number of observed alleles
1-D:Simpson index (i.e. observed diversity)
Hexp: Nei's gene diversity (i.e. expected diversity)
Evenness: evenness index per locus
