# Supplementary material for: A novel genome-wide association approach reveals wheat pathogen genes involved in host specialization
Source: Research Square preprint supplement (doi:10.21203/rs.3.rs-4486034/v1), 2024-06-04
Supplement: Supplementary file 2 [file 1e58e414dfacc7c4e74635af.xlsx]

## Sheet: TableS10
Table S10: Primers and plasmids used to generate knockout lines for functional validations.
PrimerID	Sequence	description
155_TtrpC_R	TTCTGGGTAAACGACTCATAGG	generation of plasmid, hygromycin cassette
232_Ttef_F2	CGGACATTCGATTTATGCCGTTA	generation of plasmid, hygromycin cassette
oGE001_DEL001_G00326_Nested_R	CAAAGGCCATACACGCTCAA	nested amplification and PCR transformants check, sequencing
oGE002_DEL001_G00326_Nested_F	CCAACCCAAGCTTCTCCA	nested amplification and PCR transformants check, sequencing
oGE003_DEL001_G00326_1A5-1E4_Flk1_F	GCCGAATTCGAGCTCGGTACTTGGTGGCCATTTTGGAT	generation of plasmid DEL001-1, deletion of G299 in STCH99_1A5, upstream flank
oGE004_DEL001_G00326_1A5-1E4_Flk1_R	CGGCATAAATCGAATGTCCGTTTTGCTTGTGTTGTTCGG	generation of plasmid DEL001-1, deletion of G299 in STCH99_1A5, upstream flank
oGE005_DEL001_G00326_1A5-1E4_Flk2_F	TATGAGTCGTTTACCCAGAAAGGCAGTATCGCACATCA	generation of plasmid DEL001-1, deletion of G299 in STCH99_1A5, downstream flank
oGE006_DEL001_G00326_1A5-1E4_Flk2_R	CCTCTTAAAGCTTGCATGCCACCACTCCTATCGACATT	generation of plasmid DEL001-1, deletion of G299 in STCH99_1A5, downstream flank
oGE033_GE_DEL005_G10370_F	GAGAGACAACAAGAGCACGA	nested amplification and PCR transformants check, sequencing
oGE034_GE_DEL005_G10370_R	AAAAACCAAAACCCAGCC	nested amplification and PCR transformants check, sequencing
oGE035_DEL005_G10370_1A5-1E4_Flk1_F	GCCGAATTCGAGCTCGGTACTGGACAAAGCAACTCGAT	generation of plasmid DEL005-1, deletion of G9462 in STCH99_1A5, upstream flank
oGE036_DEL005_G10370_1A5-1E4_Flk1_R	CGGCATAAATCGAATGTCCGATTTCGCAGAACAAGAGC	generation of plasmid DEL005-1, deletion of G9462 in STCH99_1A5, upstream flank
oGE037_DEL005_G10370_1A5-1E4_Flk2_F	TATGAGTCGTTTACCCAGAAGGACAATTGCTGGCATGA	generation of plasmid DEL005-1, deletion of G9462 in STCH99_1A5, downstream flank
oGE038_DEL005_G10370_1A5-1E4_Flk2_R	CCTCTTAAAGCTTGCATGCCGACGAAATGCACAACAGA	generation of plasmid DEL005-1, deletion of G9462 in STCH99_1A5, downstream flank
oTK042_HygOut_R	GGGAAGAGCTGAGATTAA	PCR transformants check
oTK034_HygOut_F	GCTCCTCTTCTTTACTCT	PCR transformants check
s001F_pCGEN_F	AACACATTGCGGACGTTTTT	generation of plasmid, E.coli colony PCR
s004R_TrpC_seq_R	GCTCCTTCAATATCAAAGCCG	generation of plasmid, E.coli colony PCR
s002R_pCGEN_R	CGAGCTGGTCACCTGTAATTC	generation of plasmid, E.coli colony PCR
s170F_Hygseq_WZ	CATGCTCCTCTTCTTTACTCTG	generation of plasmid, E.coli colony PCR
PlasmidID	description
GE_DEL001-1	Plasmid for Agrobacterium mediated transformation, deletion of G299 in STCH99_1A5, hph resistance gene
GE_DEL005-1	Plasmid for Agrobacterium mediated transformation, deletion of G9426 in STCH99_1A5, hph resistance gene
