# Supplementary material for: A novel genome-wide association approach reveals wheat pathogen genes involved in host specialization
Source: Research Square preprint supplement (doi:10.21203/rs.3.rs-4486034/v1), 2024-06-04
Supplement: Supplementary file 3 [file 71d51fbc2be182bc619d1456.xlsx]

## Sheet: Table S5
Table S5: Global statistics for the uncorrected dataset per collection timepoint
Pop	N	MLG	eMLG	SE	H	G	lambda	E.5	Hexp
c1	916	779	779	0	6.5923	661.716	0.998489	0.907011	0.506136
c3	1008	869	796.736	3.76446	6.70604	742.28	0.998653	0.908062	0.508234
Total	1924	1588	825.897	7.42511	7.28479	1276.45	0.999217	0.875425	0.508439
Pop = hierarchical population name
N = number of isolates
MLG = number of multilocus genotypes observed
eMLG = number of expected MLG at the smallest sample size
SE = standard error for the rarefaction analysis
H = Shannon-Weiner Diversity index
G = Stoddart and Taylor's Index
lambda = Simpson's index
E.5 = Evenness
Hexp = Nei's gene diversity (expected heterozygosity)
