# Supplementary material for: A novel genome-wide association approach reveals wheat pathogen genes involved in host specialization
Source: Research Square preprint supplement (doi:10.21203/rs.3.rs-4486034/v1), 2024-06-04
Supplement: Supplementary file 4 [file 77dcdc30d22692f315fa768c.xlsx]

## Sheet: Table S7
Table S7: Analysis of molecular variance (AMOVA) showing partitioning of genetic variation within and among host cultivars and collection timepoints
Components of covariance	Df	Sum Squares	Variance components	Percent of variation	P-value	Coefficient of genetic differentiation
Between collection	1	25.7061	0.0104762	0.168148	0.03	0.00168148
Between host Within collection	30	413.346	0.0226503	0.363548	0.07	0.0036416
Between samples Within host	40	462.637	0.272656	4.37624	0.01	0.0439963
Within samples	1566	9277.89	5.92458	95.0921	0.01	0.0490794
Total	1637	10179.6	6.23036	100
