# Supplementary material for: A novel genome-wide association approach reveals wheat pathogen genes involved in host specialization
Source: Research Square preprint supplement (doi:10.21203/rs.3.rs-4486034/v1), 2024-06-04
Supplement: Supplementary file 5 [file 8b0babc324c61dd21a2b9341.xlsx]

## Sheet: Table S2
Table S2: Microsatellite primers from Gautier et al 2014.
Locus	Primer name	Repeat motif in IPO323	Primer sequences (5'- > 3')	PCR reaction	Fluorescent dye
ST1	ST1_Forward	(GAC)6	F: AATCGACCCCTTCCTTCAAC	Multiplex1	AT550
ST1	ST1_Reverse	(GAC)6	R: GGGGGAGAGGCATAGTCTTG	Multiplex1	NA
ST4	ST4_Forward	(AC)7	F: TGAACATCAACCTCACACGC	Multiplex1	YYE
ST4	ST4_Reverse	(AC)7	R: AGAAGAGGACGACCCACGAG	Multiplex1	NA
ST5	ST5_Forward	(GGC)8	F: GATACCAAGGTGGCCAAGG	Multiplex1	YYE
ST5	ST5_Reverse	(GGC)8	R: CACGTTGGGAGTGTCGAAG	Multiplex1	NA
ST9	ST9_Forward	(CT)6	F: CACCTCACTCCTCAATTCCG	Multiplex1	YYE
ST9	ST9_Reverse	(CT)6	R: GAAAGGTTGGTGTCGTGTCC	Multiplex1	NA
ST10	ST10_Forward	(CAA)7	F: TCCGTCATCAACAACACCAG	Multiplex1	FAM
ST10	ST10_Reverse	(CAA)7	R: TGGCCGTAGAACTGCTGAG	Multiplex1	NA
ST13	ST13_Forward	(AG)10 (GGCA)3	F: GACTCCATTTACCTGTGGCG	Multiplex1	FAM
ST13	ST13_Reverse	(AG)10 (GGCA)3	R: TGTGAAGGACACGCAAAGAG	Multiplex1	NA
ST12	ST12_Forward	(TCC)6	F: GAATCCACCTCTTCCTTGCC	Multiplex2	AT550
ST12	ST12_Reverse	(TCC)6	R: AGGAGGATATCAAGGCCCAG	Multiplex2	NA
ST3B	ST3B_Forward	(CAA)8	F: AAGAATCCCACCACCCAAAC	Multiplex2	AT550
ST3B	ST3B_Reverse	(CAA)8	R: CACACGGCTCCTTTGACAC	Multiplex2	NA
ST6	ST6_Forward	(TCC)8	F: TCAATTGCCAATAATTCGGG	Multiplex2	YYE
ST6	ST6_Reverse	(TCC)8	R: AGACGAGGCAGTTGGTTGAG	Multiplex2	NA
ST3C	ST3c_Forward	(GCA)7	F: TCCTATCAACTCCCGAGACG	Multiplex2	YYE
ST3C	ST3c_Reverse	(GCA)7	R: CCGCACGTAGGAATTTTCAG	Multiplex2	NA
ST2	ST2_Forward	(GCT)12	F: ACACCAAAGAAGGATCCACG	Multiplex2	YYE
ST2	ST2_Reverse	(GCT)12	R: GCCGGAGGTCTATCAGTTTG	Multiplex2	NA
ST7	ST7_Forward	(AC)21	F: CACCACACCGTCGTTCAAG	Multiplex2	FAM
ST7	ST7_Reverse	(AC)21	R: CGTAAGTTGGTGGAGATGGG	Multiplex2	NA
