# Supplementary material for: A novel genome-wide association approach reveals wheat pathogen genes involved in host specialization
Source: Research Square preprint supplement (doi:10.21203/rs.3.rs-4486034/v1), 2024-06-04
Supplement: Supplementary file 6 [file 933eb9947d4daaef1353ee6a.xlsx]

## Sheet: Table S6
Table S6: Global statistics for the uncorrected dataset per host cultivar
Population	N	MLG	eMLG	SE	H	G	lambda	E.5	Hexp
CH CLARO	338	292	9.9575	0.205243	5.62254	256.152	0.996096	0.92584	0.511075
ZINAL	147	132	9.91419	0.294224	4.83195	114.333	0.991254	0.910631	0.520556
TITLIS	102	88	9.84619	0.387306	4.41598	75.3913	0.986736	0.909845	0.506924
LORENZO	219	197	9.95133	0.219909	5.24109	176.978	0.99435	0.936671	0.528651
CH CAMEDO	113	100	9.88164	0.341911	4.551	86.864	0.988488	0.916102	0.47382
MARCHEVAL	34	31	9.75936	0.458151	3.40404	28.9	0.965398	0.959244	0.508319
CASSIOPEIA	37	33	9.58562	0.627354	3.42358	26.8431	0.962746	0.870753	0.440219
RUNAL	168	147	9.91185	0.296563	4.93267	126	0.992063	0.907445	0.498984
SIMANO	112	96	9.8151	0.432793	4.48169	75.5663	0.986767	0.853321	0.494383
HALDOR	23	21	9.53416	0.619959	2.9922	18.2414	0.94518	0.910825	0.451581
AUBUSSON	118	111	9.95437	0.211422	4.68845	105.485	0.99052	0.970289	0.511215
FLORETT	7	7	7	0	1.94591	7	0.857143	1	0.440476
ARINA	87	78	9.88084	0.339193	4.31648	70.7383	0.985863	0.943369	0.5
FOREL	193	170	9.93483	0.253485	5.08664	150.806	0.993369	0.931366	0.485428
CH COMBIN	83	68	9.70869	0.527947	4.12229	53.4031	0.981275	0.863306	0.458566
AROBASE	136	116	9.87919	0.34369	4.6909	99.4409	0.989944	0.911902	0.506636
GARCIA	2	2	2	0	0.693147	2	0.5	1	0.25
Total	1919	1587	9.98819	0.108649	7.28413	1275.57	0.999216	0.875397	0.508439
Population = hierarchical population name
N = number of isolates
MLG = number of multilocus genotypes observed
eMLG = number of expected MLG at the smallest sample size
SE = standard error for the rarefaction analysis
H = Shannon-Weiner Diversity index
G = Stoddart and Taylor's Index
lambda = Simpson's index
E.5 = Evenness
Hexp = Nei's gene diversity (expected heterozygosity)
