# Supplementary material for: A novel genome-wide association approach reveals wheat pathogen genes involved in host specialization
Source: Research Square preprint supplement (doi:10.21203/rs.3.rs-4486034/v1), 2024-06-04
Supplement: Supplementary file 7 [file 97b8c96ceb6168fca67fd788.xlsx]

## Sheet: Table S3
Table S3: Microsatellite alleles found in each Zymoseptoria tritici isolate.
Isolate ID	ST1	ST4	ST5	ST9	ST10	ST13	ST12	ST3B	ST2	ST3C	ST6	ST7
c1_119_10A1	197	188	251	344	150	193	229	272	353	231	161	197
c1_119_11A1	197	186	251	340	147	193	229	275	359	246	164	200
c1_119_11A2	197	188	251	346	150	193	226	272	356	228	161	194
c1_119_11A3	197	186	251	340	144	193	229	272	359	246	164	200
c1_119_11B1	197	186	251	340	147	193	229	272	359	246	164	200
c1_119_11B2	197	186	251	340	144	193	226	275	359	246	164	200
c1_119_12A1	197	186	251	344	147	195	229	266	359	231	164	200
c1_119_12A2	197	186	251	344	147	195	229	266	359	231	164	200
c1_119_12A3	197	186	251	344	150	195	229	266	359	231	164	200
c1_119_13B1	197	186	251	340	153	193	229	275	353	231	149	182
c1_119_13B2	197	186	251	340	150	193	229	275	353	231	164	185
c1_119_13B3	197	186	251	340	150	193	229	275	353	231	164	185
c1_119_14A1	197	184	251	340	138	191	229	275	356	246	164	185
c1_119_14A2	197	186	251	340	141	193	229	275	356	246	164	182
c1_119_15A1	197	186	251	344	147	197	229	266	356	231	164	182
c1_119_15B1	197	188	251	344	156	197	229	266	356	231	164	182
c1_119_1A1	197	184	251	344	153	197	232	266	356	246	164	185
c1_119_1A2	197	184	251	346	153	197	232	266	356	246	164	185
c1_119_1A3	197	184	251	344	156	199	232	266	356	246	164	182
c1_119_1B1	197	184	251	344	156	193	229	266	359	246	167	182
c1_119_1B2	197	184	251	344	153	191	229	266	359	246	167	185
c1_119_1B3	197	184	251	344	153	191	229	266	359	246	167	185
c1_119_2A1	197	186	251	344	150	193	229	275	356	252	170	185
c1_119_2A2	197	186	251	346	153	193	229	275	356	252	170	185
c1_119_2B1	197	188	248	340	147	195	229	266	356	246	164	197
c1_119_2B2	197	188	248	340	150	195	229	266	356	246	164	197
c1_119_3A1	197	188	251	340	153	195	232	266	356	231	164	182
c1_119_4B1	197	184	251	344	156	193	244	272	356	243	170	197
c1_119_5A1	194	184	251	340	153	191	229	266	356	231	164	170
c1_119_5A2	194	184	251	340	150	193	229	266	356	231	164	170
c1_119_5A3	194	184	251	340	150	191	229	266	356	231	164	170
c1_119_6A1	197	188	251	340	153	197	229	272	356	231	164	182
c1_119_6B1	197	188	248	340	150	197	229	275	356	231	164	182
c1_119_6B2	197	188	251	340	150	197	229	272	356	231	164	185
c1_119_6B3	197	184	251	344	150	191	226	263	356	246	161	182
c1_119_7A1	197	184	248	340	153	193	229	275	359	246	164	185
c1_119_7A2	197	184	251	340	150	193	226	278	359	246	164	185
c1_119_7A3	197	184	251	340	150	191	226	275	359	246	164	185
c1_119_7B1	197	184	251	340	147	191	229	275	359	246	164	200
c1_119_7B2	197	184	251	340	144	193	229	275	359	246	164	200
c1_119_7B3	197	184	251	340	144	191	229	275	359	246	164	200
c1_119_8A2	197	186	251	342	153	193	229	278	356	231	164	182
c1_119_9A1	197	188	251	346	150	193	229	272	356	231	164	197
c1_119_9A2	197	188	251	344	147	191	229	272	356	231	164	197
c1_119_9A3	197	188	251	344	147	193	229	272	356	231	164	197
c1_119_9B2	197	190	251	340	156	193	229	275	359	231	164	211
c1_135_11B2	197	186	251	340	150	193	229	266	359	246	161	182
c1_135_12A2	200	186	251	340	153	195	229	272	356	231	164	182
c1_135_13A1	197	188	251	340	153	195	229	266	356	246	164	197
c1_135_14A1	197	184	251	340	147	193	229	266	359	246	164	185
c1_135_14A2	197	184	251	340	150	193	229	266	359	246	164	182
c1_135_14A3	197	186	251	340	150	195	229	266	359	246	164	182
c1_135_14B2	194	188	251	340	156	193	229	275	356	246	164	194
c1_135_14B3	194	188	251	340	153	193	229	275	356	246	164	197
c1_135_15A1	197	186	251	340	147	193	214	263	359	252	179	209
c1_135_15A2	197	184	251	340	144	191	226	272	356	246	164	185
c1_135_15A3	197	184	251	340	144	197	229	266	356	231	164	211
c1_135_15B1	197	186	251	340	150	193	229	266	359	246	164	182
c1_135_15B2	197	184	251	340	147	193	226	266	359	246	164	185
c1_135_15B3	197	184	251	340	147	193	226	266	359	246	164	182
c1_135_16A2	197	186	251	340	147	193	229	272	356	246	164	182
c1_135_16B1	197	184	251	340	144	191	226	272	356	246	164	185
c1_135_16B2	197	184	251	340	150	193	226	275	356	246	164	185
c1_135_1A3	197	190	251	344	150	197	229	275	353	246	164	182
c1_135_1B3	197	188	254	340	156	197	229	275	356	246	164	197
c1_135_2A1	197	186	251	340	147	193	229	272	356	246	164	185
c1_135_2A2	197	186	251	340	144	191	229	272	356	246	164	182
c1_135_2A3	197	186	251	340	144	193	226	272	356	246	164	185
c1_135_2B1	197	184	251	340	147	191	229	272	356	246	164	185
c1_135_2B2	197	184	251	340	144	191	226	272	356	246	164	185
c1_135_2B3	197	184	251	340	144	193	226	272	356	246	164	182
c1_135_3A1	197	184	251	340	147	193	226	263	359	246	164	182
c1_135_3A2	197	184	251	340	144	191	226	272	356	246	164	185
c1_135_3B2	197	186	251	340	144	193	229	272	356	246	164	182
c1_135_3B3	197	186	251	340	150	195	229	266	359	246	164	182
c1_135_7A1	197	184	251	340	144	191	229	275	356	246	164	185
c1_135_7A2	197	184	251	340	144	191	226	272	356	246	164	185
c1_135_7A3	197	184	251	340	144	191	229	275	356	246	164	185
c1_135_7B1	194	186	251	340	150	191	229	266	359	231	164	185
c1_135_7B2	194	186	251	340	153	193	229	266	359	231	164	185
c1_135_7B3	194	186	251	340	153	193	229	266	359	231	164	185
c1_135_8A1	197	186	251	346	153	197	229	275	356	231	164	185
c1_135_8A2	197	186	251	344	150	197	229	275	356	231	164	185
c1_135_8A3	197	186	251	344	150	197	226	275	356	231	164	185
c1_135_8B1	197	186	251	340	156	197	229	266	350	231	164	197
c1_135_8B2	197	186	251	340	153	197	226	266	350	231	164	197
c1_135_9A1	197	188	251	340	153	195	229	266	359	231	164	182
c1_135_9A2	197	188	251	340	150	193	229	266	359	231	164	185
c1_135_9A3	197	188	251	340	150	195	229	266	359	231	164	185
c1_135_9B1	197	186	251	340	150	193	229	263	356	231	164	197
c1_135_9B2	197	186	251	340	153	195	229	266	356	231	164	197
c1_135_9B3	197	186	251	340	150	193	229	263	356	231	164	197
c1_137_10A1	197	186	251	340	153	193	238	290	356	246	152	197
c1_137_10A2	197	184	251	340	150	193	226	266	356	246	164	185
c1_137_10A3	197	184	251	340	150	191	226	263	356	246	164	185
c1_137_14A2	197	184	251	340	150	191	226	272	356	231	164	185
c1_137_14A3	197	184	251	340	150	193	229	275	356	231	164	185
c1_137_14B1	197	188	251	340	135	193	229	272	356	231	164	185
c1_137_14B3	197	188	251	340	138	193	229	272	356	231	164	185
c1_137_15A1	197	188	251	338	150	191	229	275	356	246	164	185
c1_137_15A2	197	186	251	344	153	195	235	275	356	231	164	185
c1_137_15A3	197	188	251	340	150	193	229	272	356	231	164	185
c1_137_15B2	194	188	251	340	153	193	229	278	356	246	161	185
c1_137_16A1	197	184	251	340	153	193	229	275	356	231	164	185
c1_137_16A2	197	184	251	340	150	191	229	275	356	231	164	185
c1_137_16A3	197	184	251	340	150	191	229	272	356	231	164	185
c1_137_16B1	197	184	251	340	153	193	229	275	356	231	164	182
c1_137_16B2	197	184	251	340	150	191	229	272	356	231	164	185
c1_137_16B3	197	184	251	340	150	191	229	272	356	231	164	185
c1_137_1A1	194	184	251	340	150	191	223	275	353	231	164	179
c1_137_1A2	194	184	251	340	150	191	226	275	353	231	164	179
c1_137_1A3	194	186	251	340	153	193	226	278	353	231	164	179
c1_137_1B2	197	188	248	340	153	193	226	266	344	246	164	182
c1_137_2B1	197	184	251	344	147	191	229	266	359	231	164	185
c1_137_2B2	197	184	254	344	147	191	229	266	359	231	164	185
c1_137_6A2	197	188	251	340	150	193	226	275	356	231	164	197
c1_137_6A3	197	188	251	348	153	195	229	266	356	231	161	185
c1_137_7B1	194	188	251	340	150	193	229	275	356	231	164	211
c1_137_7B2	194	188	251	340	153	193	229	275	356	231	164	211
c1_137_8A1	197	184	251	340	150	193	226	266	359	231	164	185
c1_137_8A3	197	184	251	340	150	191	226	263	359	231	164	182
c1_137_8B1	197	186	251	340	153	199	229	272	356	231	164	197
c1_137_8B2	197	186	251	340	156	201	229	275	356	231	164	197
c1_137_9A2	197	184	251	340	150	191	226	266	356	231	164	185
c1_137_9A3	197	186	251	342	153	193	229	266	356	231	164	185
c1_137_9B2	194	186	251	340	153	193	226	272	353	231	164	225
c1_137_9B3	194	186	251	340	156	193	229	275	353	231	164	225
c1_14_10A1	197	184	251	340	153	197	229	266	356	231	181	182
c1_14_10A2	197	184	251	340	150	197	229	266	356	231	161	185
c1_14_10A3	194	184	251	342	150	193	235	272	356	231	164	185
c1_14_10B1	194	184	248	338	147	189	229	266	356	231	164	182
c1_14_10B2	194	184	251	342	150	193	232	272	356	231	164	185
c1_14_10B3	194	184	251	342	150	193	232	272	356	231	164	185
c1_14_11A1	194	186	251	340	138	193	226	266	356	246	170	185
c1_14_11A3	194	186	251	340	138	193	229	266	356	246	170	182
c1_14_11B1	194	186	251	340	138	191	229	266	356	246	170	182
c1_14_11B2	197	186	251	340	147	197	229	266	356	246	170	182
c1_14_11B3	197	186	251	340	147	193	226	263	356	231	164	182
c1_14_12A1	197	184	251	344	156	193	229	272	344	243	164	176
c1_14_12A2	197	184	251	340	147	197	226	275	356	231	164	185
c1_14_12A3	197	184	251	340	150	191	223	266	356	231	164	185
c1_14_12B1	197	184	251	340	147	191	226	275	356	246	164	185
c1_14_12B2	197	184	251	340	147	191	229	275	356	246	164	185
c1_14_12B3	197	184	251	340	147	191	226	275	356	246	164	182
c1_14_13A1	197	186	251	342	153	199	229	266	353	231	164	182
c1_14_13A2	197	184	251	340	150	197	226	263	353	231	164	182
c1_14_13A3	197	186	251	344	150	199	229	272	353	231	164	185
c1_14_13B1	197	186	251	340	150	199	229	272	353	231	164	182
c1_14_13B2	197	186	251	344	150	197	229	266	353	231	164	197
c1_14_13B3	197	184	251	340	153	193	229	263	362	231	164	197
c1_14_14A1	197	186	251	344	147	193	232	269	353	260	173	188
c1_14_14A2	197	184	245	340	150	193	226	266	353	263	164	185
c1_14_14A3	197	184	245	340	150	193	226	263	353	263	164	185
c1_14_15A1	197	184	251	340	147	191	229	263	356	231	164	185
c1_14_15A2	197	184	251	340	138	193	235	272	356	240	167	188
c1_14_15A3	197	184	251	340	147	191	226	263	356	231	164	185
c1_14_15B2	197	184	251	340	147	193	226	263	356	231	164	185
c1_14_15B3	197	184	251	340	147	191	226	266	356	231	164	185
c1_14_16A1	197	184	248	340	150	193	226	266	356	231	164	185
c1_14_16A2	197	184	251	340	150	193	229	266	356	231	164	185
c1_14_16A3	197	184	251	344	150	197	226	266	356	231	164	185
c1_14_16B1	197	184	248	340	147	193	229	278	353	231	164	182
c1_14_16B2	197	184	251	342	147	193	226	275	353	231	164	185
c1_14_16B3	197	184	251	342	147	191	226	275	353	231	164	185
c1_14_1A2	197	186	251	340	150	193	229	275	353	246	164	182
c1_14_1A3	197	186	251	340	150	191	226	272	353	246	164	182
c1_14_1B1	194	186	251	344	150	193	235	275	356	231	164	182
c1_14_1B2	194	186	251	340	150	191	226	263	356	231	167	182
c1_14_1B3	194	188	251	340	150	191	226	266	356	231	164	182
c1_14_2A1	197	184	251	340	147	193	226	266	356	231	164	185
c1_14_2A2	197	188	251	340	147	193	223	275	356	246	167	185
c1_14_2A3	197	188	251	338	153	193	229	266	356	231	164	182
c1_14_2B1	197	184	251	340	147	193	229	266	356	231	164	185
c1_14_2B2	197	184	251	340	147	193	229	266	356	231	164	185
c1_14_2B3	197	184	251	340	147	191	226	263	356	231	164	185
c1_14_3A2	197	184	251	340	144	191	229	275	356	246	164	185
c1_14_3A3	197	184	251	340	144	191	229	272	356	246	164	185
c1_14_3B1	197	186	251	344	150	191	229	263	359	231	164	185
c1_14_3B2	194	184	248	342	156	193	235	272	359	231	164	182
c1_14_3B3	194	184	251	342	150	193	232	272	359	231	164	185
c1_14_4A1	197	186	251	340	150	199	229	272	356	231	164	182
c1_14_4A2	197	186	251	344	150	199	226	272	353	231	164	185
c1_14_4A3	197	186	251	344	150	199	226	272	353	231	164	185
c1_14_4B2	197	184	251	340	147	193	229	266	353	231	164	185
c1_14_4B3	197	184	251	340	147	193	229	272	353	231	164	185
c1_14_5A1	197	186	251	340	150	193	229	272	353	231	161	182
c1_14_5A2	197	184	251	340	147	193	229	272	353	231	164	185
c1_14_5A3	197	184	251	340	147	193	226	272	353	231	164	185
c1_14_5B1	197	184	251	342	156	191	229	278	356	246	164	182
c1_14_5B2	197	184	251	340	153	191	229	275	356	246	164	185
c1_14_5B3	197	184	251	340	153	191	226	275	356	246	164	185
c1_14_6A1	194	186	251	340	138	193	229	266	356	246	170	185
c1_14_6A2	194	186	251	340	150	191	226	266	356	246	170	185
c1_14_6A3	197	186	251	340	150	191	226	266	356	231	164	185
c1_14_6B2	197	184	251	340	150	193	229	266	356	231	164	182
c1_14_7A1	197	186	251	340	150	191	226	266	359	246	161	185
c1_14_7A2	197	186	251	340	147	193	229	266	359	246	161	182
c1_14_7B1	197	186	251	340	150	197	229	266	356	231	164	185
c1_14_7B3	197	186	251	340	150	199	229	266	356	231	161	182
c1_14_8A1	194	188	251	340	147	193	229	266	359	231	164	182
c1_14_8A2	197	186	251	340	147	193	229	266	359	231	164	185
c1_14_8A3	197	186	251	340	147	191	229	266	359	231	164	185
c1_14_8B1	197	186	251	340	153	199	229	275	353	246	164	182
c1_14_8B2	197	184	251	340	153	197	229	275	353	246	164	185
c1_14_8B3	197	184	251	340	153	197	229	272	353	246	164	185
c1_14_9A3	197	186	251	340	147	193	229	266	359	246	161	182
c1_14_9B2	197	186	251	344	150	193	229	266	356	231	164	185
c1_158_10B1	197	186	251	342	153	193	232	272	353	231	164	185
c1_158_14A1	197	184	251	340	150	191	229	272	356	246	164	185
c1_158_14A2	197	184	251	340	147	191	229	272	356	246	164	185
c1_158_14A3	197	184	251	340	150	191	226	275	356	246	164	185
c1_158_14B2	197	184	251	340	150	191	226	275	356	246	164	185
c1_158_16A1	197	184	251	340	147	191	229	272	356	231	164	185
c1_158_16A2	197	184	251	340	150	197	229	266	350	231	164	185
c1_158_16B1	197	184	251	340	147	193	229	272	356	246	164	185
c1_158_16B2	197	186	251	340	150	193	232	275	356	249	167	188
c1_158_16B3	197	184	251	340	147	191	229	272	356	246	164	185
c1_158_5B1	197	186	251	340	156	193	235	266	356	231	164	231
c1_158_8A1	197	186	251	344	153	193	232	266	353	231	164	185
c1_158_8A2	197	186	251	340	150	193	232	266	353	231	164	185
c1_158_8A3	197	186	251	340	150	193	232	266	353	231	164	185
c1_158_8B1	197	188	251	344	153	193	229	266	356	231	164	185
c1_158_8B2	197	188	251	344	150	193	229	266	356	231	164	185
c1_158_9A1	197	184	251	340	150	197	229	266	359	231	164	173
c1_158_9A2	197	184	251	340	153	199	229	266	359	231	164	170
c1_158_9A3	197	184	251	340	150	197	226	266	359	231	164	173
c1_158_9B1	197	186	251	340	150	193	229	275	356	231	164	185
c1_158_9B3	197	186	251	344	150	191	229	275	356	231	164	185
c1_18_1H1	197	184	251	340	147	193	229	275	353	243	164	188
c1_18_9H1	197	184	251	340	150	193	229	278	353	243	164	188
c1_186_10H1	197	186	248	340	147	193	229	266	356	246	164	185
c1_186_10H2	197	186	248	340	150	193	229	263	356	246	164	185
c1_186_10J1	197	184	251	340	150	193	229	266	356	231	164	185
c1_186_10J2	197	184	251	340	153	197	229	275	356	231	164	182
c1_186_10K1	200	186	248	340	150	193	226	263	356	263	164	185
c1_186_10K2	197	186	251	340	153	191	229	272	356	231	164	185
c1_186_1H1	197	186	251	344	153	193	229	272	356	266	167	182
c1_186_1H2	197	186	251	344	150	193	229	272	356	266	167	182
c1_186_1J1	197	186	251	340	150	193	226	266	356	231	164	185
c1_186_3H1	197	184	251	340	153	193	226	266	356	231	164	185
c1_186_4H1	197	186	251	330	141	191	229	266	356	231	164	182
c1_186_4H2	197	186	251	346	150	197	229	266	356	231	164	185
c1_186_7H1	197	186	251	342	156	191	229	275	359	231	164	182
c1_186_9J1	197	188	251	340	156	193	226	275	356	231	164	185
c1_186_9J2	197	188	251	340	156	193	229	272	356	231	164	185
c1_2_10A1	197	184	251	340	153	197	229	266	356	246	161	211
c1_2_10A2	197	184	251	340	150	195	229	266	356	246	161	211
c1_2_10A3	197	184	251	340	150	195	229	266	356	246	161	211
c1_2_10B2	197	186	251	340	156	193	229	275	356	252	164	185
c1_2_10B3	197	186	251	340	153	193	229	275	356	252	164	185
c1_2_11A1	194	188	251	340	150	193	229	275	356	255	164	185
c1_2_11A2	194	188	251	340	150	193	229	275	356	255	164	185
c1_2_12A1	197	186	251	340	156	193	229	275	356	249	164	185
c1_2_13A2	197	186	251	340	156	193	229	272	356	249	164	185
c1_2_13B1	197	184	251	344	150	191	229	266	359	231	164	185
c1_2_14A2	197	186	251	340	153	193	232	269	356	249	170	188
c1_2_14A3	197	186	251	340	147	193	229	266	356	231	164	185
c1_2_14B1	224	186	251	344	147	193	229	266	353	231	164	185
c1_2_14B3	224	186	251	344	138	193	229	266	353	231	164	185
c1_2_15A1	197	186	251	344	150	197	229	266	356	231	173	185
c1_2_15B1	197	184	251	340	153	193	229	272	356	246	164	197
c1_2_15B2	197	170	248	338	150	189	229	272	356	246	164	197
c1_2_15B3	197	184	251	340	150	191	229	272	356	246	164	197
c1_2_16A1	224	188	254	344	150	195	229	266	353	231	161	182
c1_2_16A2	224	188	251	344	147	193	229	266	353	231	164	185
c1_2_16A3	224	188	251	344	147	193	229	266	353	231	164	185
c1_2_16B1	197	186	251	340	153	195	229	266	356	249	164	182
c1_2_16B2	197	186	251	340	150	193	229	266	356	249	164	185
c1_2_1A1	197	186	251	340	153	193	229	266	350	231	164	185
c1_2_1B2	197	188	251	342	153	197	229	266	356	246	164	185
c1_2_2A1	197	186	251	340	153	193	226	272	356	231	164	182
c1_2_2A2	197	186	251	342	156	195	229	272	356	231	164	182
c1_2_2A3	197	186	251	340	147	197	226	266	353	246	164	182
c1_2_2B2	197	186	251	342	156	195	229	272	353	231	179	182
c1_2_3A1	194	184	251	340	150	193	229	272	353	231	164	185
c1_2_3A2	194	184	251	340	147	190	229	272	353	231	164	185
c1_2_3A3	194	184	251	340	150	193	229	272	353	231	164	185
c1_2_3B1	197	184	251	340	147	193	226	272	353	231	164	185
c1_2_3B2	197	184	251	340	147	193	229	272	353	231	164	185
c1_2_3B3	197	184	248	340	147	191	226	272	353	231	164	185
c1_2_4A1	194	186	251	340	150	193	229	266	356	231	167	185
c1_2_4A2	194	186	251	340	150	191	226	263	356	231	167	185
c1_2_5A1	197	184	251	340	147	193	229	275	353	231	164	185
c1_2_5A2	197	184	251	340	147	193	226	272	353	231	164	185
c1_2_5A3	197	184	251	340	147	193	226	272	353	231	164	185
c1_2_5B1	194	184	251	340	147	197	226	266	356	231	164	185
c1_2_5B2	194	184	251	340	147	197	229	266	356	231	164	185
c1_2_5B3	194	184	251	340	147	197	226	266	356	231	164	185
c1_2_6A1	197	172	251	340	147	193	226	272	353	231	164	182
c1_2_6A2	197	186	251	340	150	197	229	275	353	246	164	182
c1_2_6B1	197	184	251	344	147	193	229	266	356	246	164	185
c1_2_6B2	197	184	251	344	147	193	226	263	356	246	164	185
c1_2_6B3	197	184	251	344	147	193	226	263	356	246	164	185
c1_2_8A1	197	184	251	340	150	193	226	275	353	246	164	182
c1_2_8A2	197	184	251	340	153	193	229	278	353	246	181	182
c1_2_8A3	197	184	251	340	150	193	229	275	353	246	164	182
c1_2_8B1	197	186	251	340	153	199	229	275	359	246	164	182
c1_2_8B2	197	184	251	340	150	197	226	272	359	246	164	182
c1_2_9A1	197	188	251	344	150	193	226	266	359	246	164	200
c1_2_9A2	197	188	251	338	153	195	229	266	359	246	164	200
c1_2_9A3	197	188	251	344	150	193	226	266	359	246	164	200
c1_2_9B1	197	186	251	340	153	193	229	272	356	246	164	197
c1_2_9B2	197	184	251	340	150	191	226	272	356	246	164	197
c1_2_9B3	194	186	251	340	153	197	229	266	356	231	161	185
c1_237_11A1	197	186	251	340	150	193	226	266	356	231	164	185
c1_237_11A3	197	186	251	340	150	193	229	266	356	231	164	185
c1_237_12B1	197	188	251	340	150	193	229	272	356	246	164	176
c1_237_12B2	197	186	251	340	150	191	226	266	356	231	164	185
c1_237_13A1	194	188	251	344	153	195	229	272	356	231	164	182
c1_237_13A2	194	188	251	344	150	195	229	275	356	231	164	185
c1_237_14A3	200	188	251	340	153	193	229	266	356	231	164	185
c1_237_14B1	197	188	251	340	153	193	229	266	356	231	164	185
c1_237_6B1	197	186	251	344	150	199	229	266	356	246	164	246
c1_237_7B1	197	188	251	340	156	199	229	266	347	246	164	185
c1_237_7B2	197	188	251	340	156	197	229	266	347	246	164	185
c1_237_8A1	197	186	251	344	156	193	229	278	356	231	164	182
c1_237_8A2	197	186	251	344	156	193	229	278	356	231	164	185
c1_237_8B1	197	186	251	344	153	193	229	266	356	246	164	185
c1_237_8B2	197	186	251	344	153	193	229	266	356	246	164	185
c1_237_8B3	197	186	251	344	153	193	229	266	356	246	164	185
c1_25_10A1	197	182	251	344	153	197	229	266	362	246	164	185
c1_25_10A2	197	182	251	340	144	190	229	266	362	246	161	182
c1_25_10A3	197	182	251	344	150	197	229	266	362	246	164	185
c1_25_10B1	194	188	251	340	150	193	229	275	356	246	164	185
c1_25_10B2	194	188	251	340	153	193	229	272	356	246	164	185
c1_25_10B3	197	184	251	340	153	197	229	275	356	231	164	197
c1_25_11A1	197	184	251	340	150	191	229	278	356	231	164	185
c1_25_11A2	197	184	251	340	150	191	226	278	356	231	164	185
c1_25_11A3	197	184	251	340	150	191	226	278	356	231	164	185
c1_25_11B1	197	184	251	340	135	191	229	275	362	231	164	211
c1_25_11B2	197	184	251	340	135	191	229	275	362	231	164	211
c1_25_11B3	197	184	251	340	138	191	229	275	362	231	164	211
c1_25_12A2	194	186	251	344	153	197	229	266	359	243	164	200
c1_25_12A3	194	186	251	344	153	197	229	266	359	243	164	200
c1_25_12B1	197	186	251	330	150	201	229	275	356	231	161	185
c1_25_12B2	197	186	251	340	153	193	229	278	356	231	164	188
c1_25_12B3	197	186	251	340	153	193	229	278	356	231	164	188
c1_25_13A1	194	184	251	340	153	197	229	266	356	231	164	185
c1_25_13A2	194	184	251	340	153	197	229	266	356	231	164	185
c1_25_13A3	194	184	251	340	153	197	229	266	356	231	164	185
c1_25_13B1	197	184	251	338	135	191	229	272	362	231	164	211
c1_25_13B2	197	184	251	340	135	193	229	275	362	231	164	211
c1_25_13B3	197	184	251	340	135	191	229	275	362	231	164	211
c1_25_14A1	194	186	251	340	150	197	229	266	356	231	164	185
c1_25_14A2	194	186	251	340	150	197	229	266	356	231	164	185
c1_25_15A1	194	186	251	344	150	195	229	275	362	243	164	185
c1_25_15A2	194	186	251	346	153	197	229	266	362	243	164	182
c1_25_15A3	194	186	251	344	150	195	229	272	362	243	164	185
c1_25_15B1	197	186	251	340	150	193	229	266	356	246	164	197
c1_25_15B2	197	186	251	340	150	193	229	266	356	246	164	197
c1_25_1A1	197	184	248	340	150	197	235	275	356	231	164	185
c1_25_1A2	197	184	248	340	150	197	235	275	356	231	164	185
c1_25_1A3	197	184	245	340	150	197	235	278	356	231	161	185
c1_25_1B1	197	184	251	340	150	193	229	275	356	246	164	185
c1_25_1B2	197	186	251	340	153	195	229	275	356	246	164	185
c1_25_1B3	197	186	251	340	150	193	229	275	356	246	164	185
c1_25_2A2	194	186	251	340	153	193	229	275	344	231	164	182
c1_25_2A3	194	186	251	340	150	193	229	275	344	231	164	185
c1_25_2B1	197	184	251	340	150	191	229	275	356	231	164	185
c1_25_2B2	197	186	251	340	153	193	229	275	356	231	161	182
c1_25_2B3	197	184	251	340	150	193	229	275	356	231	164	185
c1_25_3A1	194	184	251	344	150	195	229	275	362	243	161	185
c1_25_3A2	194	184	251	344	150	195	229	275	362	243	164	185
c1_25_3A3	194	184	251	344	150	195	232	275	362	246	164	185
c1_25_3B1	194	184	251	344	150	195	229	275	362	243	161	185
c1_25_3B3	194	184	251	344	150	195	229	275	362	243	164	185
c1_25_4B1	197	186	251	340	150	191	226	275	356	246	164	185
c1_25_5A1	194	184	251	344	150	195	229	275	362	243	164	185
c1_25_5A2	194	184	251	344	153	195	229	275	362	243	164	185
c1_25_5A3	194	184	251	340	150	197	229	275	356	231	164	185
c1_25_5B1	194	186	245	340	147	193	229	266	356	231	164	197
c1_25_5B2	197	186	251	340	144	197	229	266	356	231	164	197
c1_25_5B3	197	186	251	340	144	197	229	266	356	266	164	197
c1_25_6A1	197	186	254	340	153	193	226	275	356	246	161	182
c1_25_6A3	197	184	251	340	150	191	226	266	356	246	164	185
c1_25_6B1	194	184	251	340	153	193	229	266	356	231	164	185
c1_25_6B2	197	184	251	340	147	197	232	266	356	246	167	185
c1_25_6B3	194	184	251	340	150	193	229	266	356	231	164	185
c1_25_7B1	197	172	251	340	156	193	229	275	356	246	164	185
c1_25_7B2	197	172	251	340	153	191	229	272	356	246	164	185
c1_25_8A1	197	186	251	340	150	199	229	275	350	231	164	197
c1_25_8A3	197	186	251	340	150	193	229	266	359	228	164	185
c1_25_8B1	197	182	251	340	150	193	229	278	350	246	164	182
c1_25_8B2	197	182	251	340	150	193	229	278	350	246	164	185
c1_25_8B3	197	182	251	340	150	193	229	278	350	246	164	185
c1_25_9A1	197	186	251	342	153	195	229	266	359	231	167	182
c1_25_9A2	197	186	251	340	150	193	229	266	359	231	167	185
c1_25_9A3	197	186	251	340	150	193	229	266	359	231	167	185
c1_25_9B1	197	184	251	340	153	193	229	266	356	246	161	197
c1_25_9B2	197	184	251	340	150	191	226	281	356	266	164	179
c1_25_9B3	197	184	251	340	150	191	226	281	356	266	164	179
c1_290_16H1	197	186	248	340	150	193	235	272	353	231	164	185
c1_290_16H2	197	186	251	340	150	193	235	275	353	231	164	185
c1_290_2H1	197	188	251	340	153	199	229	266	356	246	164	182
c1_290_2H2	197	188	251	340	153	199	229	266	356	246	164	185
c1_290_4H1	194	186	251	340	138	189	229	266	356	246	164	182
c1_290_6H1	197	188	251	342	153	199	226	278	359	231	161	182
c1_290_9H1	197	186	251	340	153	193	226	266	356	255	164	182
c1_335_10A1	197	184	251	340	150	191	229	272	359	231	164	185
c1_335_10B1	197	188	251	344	153	197	235	275	356	231	164	211
c1_335_10B2	197	186	251	340	150	197	229	266	356	231	164	185
c1_335_11B1	197	186	251	340	147	193	229	275	356	231	164	185
c1_335_11B2	197	186	251	340	144	193	229	275	356	231	164	185
c1_335_11B3	197	186	251	340	147	193	229	272	356	231	164	185
c1_335_14B1	194	186	251	344	150	191	229	287	356	231	167	197
c1_335_15A1	197	186	251	340	150	193	226	272	356	249	167	182
c1_335_15A2	197	186	251	340	150	193	226	272	356	249	164	182
c1_335_15B1	197	186	251	344	150	197	229	284	356	246	164	179
c1_335_15B2	197	186	251	344	153	199	229	281	356	246	164	176
c1_335_1A1	197	186	251	344	150	191	226	263	356	228	164	185
c1_335_1B1	197	186	251	344	150	191	226	266	356	263	164	185
c1_335_2B1	197	186	251	340	153	197	229	275	356	246	164	185
c1_335_2B2	197	186	251	340	150	191	226	266	356	263	164	185
c1_335_6A1	194	186	251	344	150	193	226	287	356	228	164	197
c1_335_7A1	197	188	251	342	156	193	229	266	356	231	164	185
c1_335_7B1	197	186	248	340	138	193	229	275	356	231	164	225
c1_335_7B2	197	186	251	340	153	193	229	275	356	231	164	185
c1_335_8A1	194	186	251	340	153	193	229	266	356	231	164	185
c1_335_8A2	194	186	251	340	153	193	229	266	356	231	164	182
c1_335_8B1	194	186	251	344	150	191	229	287	356	231	164	197
c1_335_8B2	194	186	251	344	150	193	229	287	356	231	164	197
c1_335_9A1	194	186	251	344	150	193	229	287	356	231	164	197
c1_335_9A2	194	186	251	344	153	193	229	287	356	231	164	197
c1_335_9B1	194	188	251	340	150	197	229	266	356	231	164	197
c1_335_9B2	194	188	251	340	147	197	229	266	356	231	164	197
c1_335_9B3	194	188	251	344	150	193	226	266	356	231	164	185
c1_345_2H1	197	186	251	340	150	193	229	266	359	246	164	185
c1_345_2H2	197	186	251	340	147	193	229	266	359	246	164	185
c1_438_13A1	197	186	251	344	153	193	229	272	356	246	164	197
c1_438_13A2	197	186	251	344	150	193	229	275	356	246	164	197
c1_438_2A1	194	188	251	340	153	193	229	266	359	246	164	182
c1_438_2A2	194	188	251	340	153	193	229	266	359	246	164	185
c1_438_3A1	194	188	251	340	153	193	229	266	356	231	161	197
c1_438_5A1	197	188	251	340	150	199	229	266	353	246	164	179
c1_438_5A2	197	188	251	340	150	191	229	275	353	246	167	185
c1_438_6A1	197	188	251	340	150	193	226	272	356	231	164	185
c1_438_6A2	197	188	251	340	150	193	226	263	356	231	164	185
c1_438_6B1	197	186	251	340	156	193	229	275	356	231	164	197
c1_438_6B2	197	186	251	340	147	193	226	272	356	231	164	185
c1_438_6B3	197	186	251	340	147	197	226	263	356	246	164	179
c1_438_7B1	197	186	251	340	150	191	229	266	356	231	164	185
c1_438_7B2	197	186	251	340	153	193	229	275	356	231	164	197
c1_438_7B3	197	188	251	340	150	199	226	266	356	231	164	185
c1_438_8A1	197	188	251	340	150	193	226	266	356	231	164	185
c1_438_8H3	197	188	251	340	150	193	226	266	356	231	164	185
c1_438_8J1	197	186	251	340	153	193	226	275	359	231	164	197
c1_438_8J2	197	186	251	340	153	191	229	275	353	246	167	182
c1_439_10B1	197	186	248	340	150	197	226	275	356	246	164	185
c1_439_10B2	197	186	251	340	150	193	229	266	356	231	164	185
c1_439_10B3	197	186	251	340	147	193	229	275	356	231	164	182
c1_439_11A1	197	186	251	340	150	195	226	263	356	246	164	185
c1_439_11A2	197	186	251	340	153	195	226	266	356	246	164	185
c1_439_11A3	197	186	248	340	150	195	229	266	356	246	164	185
c1_439_12A1	197	184	251	340	150	191	229	266	356	231	146	185
c1_439_12A2	197	184	251	340	150	193	229	266	356	231	146	185
c1_439_12B1	197	184	251	340	150	193	229	266	356	231	146	185
c1_439_13A1	197	192	251	340	153	193	229	275	356	231	167	179
c1_439_13B1	197	188	251	340	150	197	226	266	356	231	164	179
c1_439_13B2	197	188	251	340	153	199	229	266	356	231	164	179
c1_439_1A1	197	186	251	340	153	197	229	278	353	246	164	197
c1_439_1A2	197	186	251	340	150	197	226	275	353	246	164	197
c1_439_1C1	194	184	251	344	150	191	226	272	356	231	164	185
c1_439_1C2	194	184	251	344	150	193	229	275	356	231	164	185
c1_439_2A2	194	184	251	344	150	193	226	272	356	231	164	185
c1_439_2A3	194	184	251	344	150	193	229	272	356	231	164	185
c1_439_3A2	NA	NA	NA	NA	NA	NA	229	266	356	246	164	185
c1_439_3B1	NA	NA	NA	NA	NA	NA	229	263	356	231	164	185
c1_439_6B1	197	186	251	344	156	193	229	266	356	246	164	182
c1_439_6B2	197	186	251	344	153	193	229	266	356	231	164	185
c1_439_8B1	197	186	251	340	135	193	226	263	356	231	164	185
c1_439_8B2	197	186	251	340	135	191	226	266	356	231	164	185
c1_439_8B3	197	186	251	340	156	193	229	278	356	231	164	185
c1_439_9A2	197	186	251	340	153	193	229	266	356	231	146	185
c1_439_9A3	197	186	251	340	150	193	226	266	356	231	146	185
c1_439_9B1	197	186	251	340	156	193	232	266	356	231	164	185
c1_439_9B2	197	186	251	340	153	191	232	266	356	231	164	185
c1_439_9B3	197	186	251	342	156	193	235	266	356	231	164	185
c1_45_13A1	197	184	251	340	150	193	229	275	356	246	164	185
c1_45_13B2	212	196	251	330	150	205	229	278	356	246	164	197
c1_45_14A1	197	186	251	344	147	193	229	278	356	246	164	197
c1_45_14A2	197	186	251	344	147	193	229	278	356	246	164	197
c1_45_14A3	197	186	251	340	147	197	229	266	356	231	164	185
c1_45_15A1	197	186	251	340	147	197	229	266	356	231	164	185
c1_45_15A2	197	186	251	340	147	197	229	266	356	231	164	185
c1_45_15A3	197	186	251	344	147	191	229	278	356	246	164	197
c1_45_16A1	197	186	251	344	147	193	229	278	356	246	164	197
c1_45_16A3	197	186	251	344	150	195	229	278	356	246	164	197
c1_45_2A1	197	186	251	344	147	193	229	278	356	246	164	197
c1_45_2A2	197	186	251	344	150	193	229	278	356	246	164	197
c1_45_2A3	197	186	251	344	147	193	229	275	356	246	164	197
c1_45_3A1	197	184	251	344	147	193	229	278	356	246	164	197
c1_45_3A2	197	184	251	344	147	193	229	275	356	246	164	197
c1_45_3A3	197	184	251	344	150	193	226	275	356	246	164	197
c1_45_7A1	197	184	251	344	147	193	226	275	356	246	164	197
c1_45_7A2	197	184	251	344	147	191	229	278	356	246	164	197
c1_45_7A3	197	184	251	344	147	191	229	278	356	246	164	197
c1_45_8A2	197	184	251	340	144	189	229	278	356	246	164	197
c1_45_8A3	197	184	251	344	147	191	229	278	356	246	164	197
c1_45_8B1	197	186	251	340	153	195	229	275	359	246	164	223
c1_458_10A1	197	188	251	340	153	199	229	275	356	231	164	182
c1_458_10A2	197	188	251	340	150	197	226	275	356	231	164	185
c1_458_10A3	197	188	251	340	150	197	226	275	356	231	161	185
c1_458_10B1	197	186	251	340	153	199	229	266	356	231	164	182
c1_458_10B2	197	186	251	340	150	197	229	275	356	231	164	185
c1_458_13A1	197	186	251	340	147	199	235	275	353	231	167	182
c1_458_13A2	197	184	251	340	144	197	235	272	353	231	167	185
c1_458_13B1	197	186	251	340	153	197	229	266	356	231	164	182
c1_458_1A3	197	186	251	332	156	191	229	275	356	231	164	182
c1_458_2A1	197	186	251	340	150	187	229	284	356	231	164	197
c1_458_2A2	197	186	251	334	144	193	229	272	356	231	164	185
c1_458_2A3	197	186	251	340	147	193	226	281	356	231	164	197
c1_458_5A2	194	184	251	340	150	197	229	275	356	246	164	182
c1_458_5A3	194	184	251	340	150	197	226	275	356	246	161	182
c1_458_6A1	194	186	251	342	153	193	229	272	350	231	164	197
c1_458_6A2	194	186	251	342	153	193	226	272	350	231	164	197
c1_458_6A3	194	186	251	342	150	193	226	269	350	231	164	197
c1_458_6B1	197	188	251	340	153	199	229	275	356	231	164	231
c1_458_6B2	197	186	251	340	150	197	229	275	356	231	164	185
c1_458_7B1	197	184	248	340	150	193	229	272	356	246	164	185
c1_458_7B2	197	184	248	340	150	193	226	266	356	231	167	185
c1_458_7B3	197	186	248	342	153	195	229	266	356	231	164	185
c1_458_8B1	197	188	251	340	138	193	226	266	359	231	167	185
c1_458_8B3	197	188	251	340	138	193	229	272	356	246	164	185
c1_458_9A1	197	188	251	344	150	193	226	272	356	246	164	185
c1_458_9A2	197	188	251	344	153	193	229	266	353	246	164	182
c1_458_9A3	197	188	251	344	150	193	226	275	356	246	164	185
c1_459_2J1	197	184	251	344	147	193	226	263	362	231	164	185
c1_459_2J2	197	184	251	344	147	193	229	275	353	246	164	185
c1_459_2J3	197	184	251	344	150	193	229	275	356	246	164	185
c1_459_6S1	194	186	251	344	147	191	229	266	359	231	167	185
c1_459_6S2	194	186	251	344	147	191	229	263	359	231	167	185
c1_470_11A2	197	186	251	340	150	197	229	266	356	231	164	185
c1_470_2A1	194	184	251	332	150	197	229	272	356	246	164	182
c1_470_2A2	194	184	251	334	150	197	229	272	356	246	164	185
c1_470_2A3	194	184	251	334	150	197	226	272	356	246	164	185
c1_470_5A2	197	184	251	340	150	191	229	266	362	231	164	185
c1_470_5B1	197	184	251	344	147	195	226	275	356	246	164	185
c1_470_5B2	197	184	251	344	150	195	229	275	356	246	164	185
c1_470_5B3	197	184	251	340	147	189	226	266	362	231	164	185
c1_470_6A3	197	188	251	340	153	193	229	266	344	231	170	185
c1_470_7B1	197	186	251	340	153	193	229	275	353	246	164	185
c1_470_7B2	197	186	251	340	150	193	229	272	353	246	164	185
c1_470_7B3	197	186	251	340	153	191	229	275	353	246	164	185
c1_51_10B1	197	186	251	340	153	193	226	272	359	246	164	185
c1_51_10B2	197	186	251	340	150	193	229	275	359	246	164	185
c1_51_10B3	197	186	251	340	150	193	229	275	359	246	164	185
c1_51_11A1	197	186	251	340	147	193	229	266	356	246	164	197
c1_51_11A2	197	188	251	340	150	193	226	263	356	246	164	197
c1_51_11A3	197	186	251	340	147	193	229	266	356	246	164	197
c1_51_11B2	197	186	254	338	150	193	229	275	347	246	164	182
c1_51_11B3	197	186	251	338	150	193	229	275	347	246	164	185
c1_51_12A2	197	186	251	342	153	197	229	275	356	243	164	197
c1_51_12A3	197	186	251	340	150	197	229	275	356	243	164	197
c1_51_12B1	194	184	251	340	150	191	229	266	362	246	164	185
c1_51_12B2	194	184	251	340	150	191	229	266	362	246	164	185
c1_51_12B3	194	184	251	340	150	191	226	263	362	246	164	185
c1_51_13A2	197	188	251	340	153	197	229	266	359	246	164	197
c1_51_13A3	197	188	251	340	153	197	229	266	359	246	164	197
c1_51_14A1	197	184	251	340	150	193	229	281	356	246	164	197
c1_51_14A2	197	184	251	340	150	193	229	278	356	246	164	197
c1_51_14A3	197	184	251	340	150	193	229	278	356	246	164	197
c1_51_14B1	194	184	251	340	144	193	229	266	356	231	164	197
c1_51_14B2	194	184	251	340	144	193	229	275	356	246	164	185
c1_51_14B3	194	184	251	342	147	195	229	278	356	246	164	185
c1_51_15A1	197	186	251	340	150	193	229	275	356	231	164	185
c1_51_15A2	197	186	251	340	150	191	229	266	356	246	164	197
c1_51_15A3	197	186	251	340	147	191	226	263	356	246	164	197
c1_51_15B1	197	184	245	340	150	193	235	266	356	246	164	185
c1_51_15B2	197	186	251	338	153	193	229	275	347	246	164	185
c1_51_15B3	197	184	251	338	150	191	229	275	347	246	164	185
c1_51_1A1	197	188	254	344	150	193	229	275	356	246	164	185
c1_51_1A2	197	188	251	344	147	193	229	278	356	246	164	185
c1_51_2A1	197	188	245	340	150	191	229	278	356	231	164	185
c1_51_2A2	197	188	248	340	153	191	229	278	356	231	164	185
c1_51_2A3	197	188	248	340	150	191	229	278	356	231	164	185
c1_51_2B1	197	186	251	340	147	191	229	299	356	231	164	185
c1_51_2B2	197	186	251	340	150	193	229	299	356	231	164	185
c1_51_2B3	197	186	251	342	150	193	229	299	356	231	164	185
c1_51_3A1	194	186	251	340	147	193	229	278	356	246	164	185
c1_51_3A2	194	186	251	344	153	191	229	275	356	231	164	185
c1_51_3A3	194	186	251	344	153	191	229	275	356	231	164	185
c1_51_3B1	194	186	251	340	153	199	229	272	356	231	164	185
c1_51_3B2	194	186	251	340	150	199	229	272	356	231	164	185
c1_51_3B3	194	186	251	340	144	193	229	275	356	246	164	185
c1_51_4A2	197	186	251	340	150	193	229	266	353	231	164	188
c1_51_4B1	194	184	251	340	144	193	226	275	356	246	164	185
c1_51_4B2	194	184	251	340	147	193	229	275	356	246	164	182
c1_51_4B3	194	184	251	340	144	193	226	275	356	246	161	185
c1_51_5A1	197	186	251	340	147	193	229	266	356	246	164	185
c1_51_5A2	197	186	251	340	150	193	229	272	356	246	164	185
c1_51_6A1	194	186	251	340	150	199	229	272	356	231	164	185
c1_51_6A2	194	186	251	340	150	199	229	275	356	231	164	185
c1_51_6A3	194	186	251	340	150	199	226	272	356	231	164	185
c1_51_6B1	197	186	251	340	147	193	229	278	356	246	161	182
c1_51_6B2	197	186	251	340	144	193	229	278	356	246	164	185
c1_51_6B3	197	186	251	340	144	193	229	266	359	231	164	197
c1_51_7A1	197	184	251	340	144	191	226	263	359	231	164	197
c1_51_7A2	197	184	251	340	144	193	229	266	359	231	164	197
c1_51_7A3	197	184	251	340	144	193	229	278	356	231	164	185
c1_51_7B1	197	184	251	340	144	191	229	266	359	231	164	197
c1_51_7B2	197	184	251	340	144	191	226	266	359	231	164	197
c1_51_7B3	197	184	251	340	144	193	229	266	359	231	164	197
c1_51_8A1	194	186	251	340	150	199	229	275	356	231	164	185
c1_51_8A2	194	186	251	340	150	199	229	272	356	231	164	185
c1_51_8A3	194	188	251	340	153	201	229	272	356	231	164	185
c1_51_8B1	197	182	251	340	150	191	229	266	359	231	164	185
c1_51_8B2	197	184	251	340	153	193	229	266	359	231	164	185
c1_51_8B3	197	184	251	340	153	193	229	266	359	231	164	231
c1_51_9A1	197	188	251	344	153	193	229	272	356	231	161	182
c1_51_9A3	197	188	251	340	147	193	229	266	356	246	164	197
c1_51_9B1	197	188	251	340	153	193	229	272	359	246	164	182
c1_515_10A1	197	186	251	340	153	193	229	266	359	246	164	197
c1_515_10A2	197	184	251	340	150	191	229	266	359	246	164	197
c1_515_10A3	197	184	251	340	150	191	226	266	359	246	164	197
c1_515_10B1	197	188	251	340	153	195	229	278	356	246	164	185
c1_515_10B2	197	188	251	340	150	193	229	275	356	246	164	185
c1_515_10B3	197	188	251	340	150	193	229	275	356	246	164	185
c1_515_13B1	197	186	248	340	156	199	229	266	356	246	164	185
c1_515_3A1	197	184	251	340	150	191	229	266	356	231	164	185
c1_515_3A2	197	184	251	340	150	189	226	266	356	231	164	185
c1_515_3A3	197	184	251	340	150	189	226	266	356	231	164	185
c1_515_3B1	197	186	251	340	153	197	229	272	353	246	164	197
c1_515_3B3	197	186	251	340	153	195	229	266	356	231	164	185
c1_515_4A1	197	188	248	340	153	197	229	275	356	231	164	185
c1_515_4A3	197	188	248	340	153	199	229	275	356	231	164	185
c1_515_5B1	194	186	251	340	156	199	229	266	356	246	164	185
c1_515_5B2	194	186	251	340	153	197	229	266	356	246	164	185
c1_515_5B3	194	186	251	340	153	197	229	266	356	246	164	185
c1_515_6A1	197	184	251	340	153	193	229	272	356	246	164	185
c1_515_6A2	197	184	251	340	150	193	226	275	356	246	164	185
c1_515_6A3	197	184	251	340	150	191	226	272	356	246	164	185
c1_517_10A1	197	186	251	346	153	193	229	266	356	231	164	197
c1_517_10A2	197	186	251	346	153	193	226	263	356	231	164	197
c1_517_2A1	197	186	251	340	153	193	229	272	356	231	164	185
c1_517_2A2	197	186	251	340	153	193	229	272	356	231	164	185
c1_517_2A3	197	186	251	340	153	193	229	272	356	231	164	185
c1_517_2B1	197	188	251	340	150	197	229	266	356	246	164	185
c1_517_2B2	197	188	251	340	153	197	220	257	350	237	158	176
c1_517_2H1	197	186	251	340	156	193	229	275	356	231	164	182
c1_517_3B1	197	186	245	344	150	193	229	266	356	231	164	185
c1_517_3B2	197	186	251	340	153	193	229	272	356	231	164	185
c1_517_3B3	197	186	251	340	156	193	229	272	356	231	164	185
c1_517_5A3	197	186	248	346	153	193	229	263	350	231	164	185
c1_517_6A1	197	186	245	344	150	193	229	266	356	231	164	185
c1_517_6A2	197	186	248	344	153	193	229	266	356	231	164	185
c1_541_10A1	197	188	251	340	153	199	229	275	359	231	164	182
c1_541_10A2	197	188	251	340	150	199	229	272	359	231	164	185
c1_541_10B2	197	188	251	340	153	199	229	272	359	231	164	182
c1_541_10B3	197	188	251	340	150	199	229	272	359	231	164	185
c1_541_11B1	197	184	251	342	153	197	229	275	356	246	164	185
c1_541_11B2	197	184	251	340	150	191	229	275	356	231	164	197
c1_541_11B3	197	184	251	340	153	191	229	272	356	231	164	197
c1_541_12B1	197	186	251	338	153	193	229	266	356	231	164	182
c1_541_14A2	197	186	251	340	153	197	229	272	356	246	164	182
c1_541_14B1	197	186	251	340	150	193	229	275	356	243	164	185
c1_541_1A1	197	186	251	342	156	197	229	275	356	246	164	185
c1_541_1A2	197	188	248	342	153	193	229	275	356	231	164	182
c1_541_2A1	197	186	251	342	156	199	229	275	356	246	164	182
c1_541_2B1	197	188	251	340	156	193	232	272	356	231	164	197
c1_541_4B1	197	188	248	340	147	193	229	275	356	246	167	185
c1_541_5A1	197	186	251	340	150	193	229	275	356	243	164	185
c1_541_5B1	197	186	251	340	147	193	229	266	356	231	164	197
c1_541_6A1	197	188	251	340	150	193	229	275	356	246	167	185
c1_541_6A2	197	188	251	340	147	191	229	275	356	246	167	185
c1_541_6B2	197	186	254	340	156	197	229	266	356	249	164	197
c1_541_8A1	197	186	248	340	153	191	229	272	347	231	164	182
c1_541_9A1	197	186	251	340	153	193	229	272	353	231	164	197
c1_541_9B1	200	186	251	340	135	197	229	266	359	249	164	185
c1_571_14A1	197	186	248	340	153	193	229	266	359	231	161	182
c1_571_7A1	197	188	251	344	138	193	229	275	356	246	164	197
c1_571_7B1	197	186	248	340	150	193	229	266	359	231	164	185
c1_571_7B2	197	186	251	342	153	199	229	266	356	249	164	197
c1_571_7B3	197	186	248	340	150	193	229	266	359	231	164	185
c1_580_2A1	194	184	251	344	150	197	229	275	356	231	164	185
c1_580_2A2	194	184	251	344	150	197	229	275	356	231	164	185
c1_580_2A3	194	184	251	344	153	197	229	272	356	231	164	182
c1_580_2B2	197	186	251	342	153	193	232	275	353	231	164	185
c1_580_3A1	197	188	251	334	153	193	229	266	356	231	164	185
c1_580_3A2	197	186	251	340	147	197	229	266	356	231	164	197
c1_580_3B1	197	188	251	340	156	195	229	266	353	231	164	182
c1_580_5B1	197	186	251	340	156	197	229	266	356	231	164	182
c1_580_5B2	197	186	251	340	153	197	229	266	356	246	164	185
c1_580_5B3	197	186	251	340	144	197	229	266	356	231	164	197
c1_580_6A1	197	186	251	340	157	197	229	266	356	231	164	185
c1_580_6A2	197	186	251	340	156	197	229	266	356	231	164	185
c1_580_6A3	197	186	251	340	156	197	229	266	356	231	164	185
c1_580_6B1	197	188	251	340	153	197	229	263	359	231	164	182
c1_580_8A1	197	186	251	340	144	197	229	266	356	231	164	197
c1_580_8A2	197	186	251	340	144	197	229	266	356	231	164	197
c1_580_8A3	197	186	251	340	147	197	229	266	356	231	164	197
c1_580_8B2	194	186	251	344	150	197	229	275	356	231	164	185
c1_580_8B3	194	186	251	344	147	199	229	266	356	231	164	182
c1_59_10B1	197	188	251	346	153	193	229	275	353	231	164	197
c1_59_12A1	197	188	251	340	153	197	229	272	356	246	161	182
c1_59_14A1	197	186	248	340	153	193	229	266	356	231	161	182
c1_59_14B1	197	188	251	344	153	193	229	278	356	231	164	185
c1_59_15A1	197	188	251	346	153	193	232	275	350	231	164	185
c1_59_15B1	197	188	245	344	153	193	232	278	356	231	164	182
c1_59_16A1	197	186	248	340	150	193	229	266	356	246	164	197
c1_59_16A2	197	186	251	344	150	191	229	278	356	231	164	185
c1_59_16A3	197	186	245	344	153	193	232	278	356	231	164	182
c1_59_1A1	197	186	245	340	153	193	229	266	356	246	161	197
c1_59_2A1	197	186	251	344	150	193	232	278	356	231	164	185
c1_59_2A2	197	186	251	344	150	191	232	278	356	231	164	185
c1_59_3A1	194	184	251	340	147	197	229	275	356	246	164	185
c1_59_3A2	194	184	251	340	147	197	229	275	356	246	164	185
c1_59_3B1	197	186	251	340	153	193	229	278	359	246	164	185
c1_59_4A1	197	186	251	340	153	193	229	299	350	231	161	182
c1_59_5B1	197	186	251	340	153	187	229	266	356	231	164	182
c1_59_6A1	197	186	251	340	153	197	229	275	356	246	164	185
c1_59_6A2	194	186	251	340	150	197	229	263	356	246	164	185
c1_59_7A1	197	186	251	340	153	193	229	278	359	246	164	185
c1_59_7A2	197	186	251	340	150	197	229	272	359	231	170	182
c1_59_8A1	197	188	251	340	150	199	229	275	359	231	170	185
c1_59_8A2	197	186	251	340	150	193	229	278	359	231	164	185
c1_611_10A1	197	184	251	330	156	191	229	272	356	231	164	182
c1_611_10A2	197	184	251	334	153	193	226	272	356	246	164	182
c1_611_10A3	197	184	251	334	153	193	226	272	356	246	164	182
c1_611_10B1	194	186	251	340	150	193	232	266	359	234	164	185
c1_611_10B2	194	186	251	340	153	193	235	266	359	231	164	182
c1_611_11B1	197	184	251	340	150	197	229	263	356	231	164	185
c1_611_11B3	197	186	248	340	153	199	229	266	356	231	164	182
c1_611_12B1	197	186	251	344	156	193	229	275	359	246	164	188
c1_611_13B1	194	184	251	344	150	193	226	275	353	246	164	185
c1_611_13B2	194	184	251	344	153	193	229	275	353	246	164	182
c1_611_14B1	197	188	248	340	150	193	229	266	356	246	164	182
c1_611_14B2	197	188	245	340	150	193	229	266	356	246	164	185
c1_611_14B3	197	188	248	340	150	193	229	266	356	246	164	185
c1_611_1A1	197	184	251	340	153	197	229	266	356	231	161	182
c1_611_1A2	197	184	251	340	150	197	229	263	356	231	164	185
c1_611_2A1	197	184	251	340	150	197	226	266	359	246	164	182
c1_611_2A2	197	184	251	340	150	197	226	266	359	246	164	182
c1_611_2A3	197	184	251	340	153	199	229	266	359	246	164	182
c1_611_2B1	197	184	251	340	153	197	229	266	356	246	164	182
c1_611_2B2	194	186	251	340	150	193	226	272	356	231	164	185
c1_611_2B3	197	184	251	340	150	197	226	266	356	246	161	185
c1_611_3A1	197	184	251	342	153	193	229	272	341	231	167	182
c1_611_3A2	197	184	251	342	153	193	229	275	341	231	167	185
c1_611_3A3	197	184	251	342	153	193	226	275	341	231	167	185
c1_611_4A1	194	184	251	340	150	193	226	269	365	231	164	197
c1_611_4A2	194	184	251	340	150	193	229	272	365	231	164	197
c1_611_4A3	194	184	251	340	153	193	229	272	365	231	164	197
c1_611_6A1	194	188	251	340	150	193	229	266	356	231	164	197
c1_611_6A2	194	188	251	340	147	191	229	266	356	231	164	197
c1_611_6A3	194	188	251	340	147	191	229	266	356	231	164	197
c1_611_6B1	194	184	251	340	153	193	229	272	359	231	164	182
c1_611_6B2	197	184	251	340	150	197	226	266	359	246	164	185
c1_611_6B3	197	184	251	340	150	197	229	266	359	246	164	185
c1_611_7A1	197	184	251	344	147	195	226	272	356	249	164	185
c1_611_7A2	197	184	251	344	150	195	229	272	356	249	164	182
c1_611_7A3	197	184	251	344	147	195	229	272	356	249	164	185
c1_611_7B1	197	186	251	340	150	193	232	278	356	234	164	185
c1_611_7B2	197	186	251	340	150	197	229	266	356	231	164	185
c1_611_7B3	197	186	251	340	153	193	235	278	356	231	164	182
c1_611_8A1	197	184	251	344	135	191	226	275	353	231	164	185
c1_611_8A2	197	184	251	344	138	193	229	275	353	231	161	182
c1_611_8A3	197	184	251	344	138	191	229	275	353	231	164	182
c1_611_8B1	197	186	251	344	138	193	229	275	353	231	164	182
c1_611_9A2	197	186	251	342	156	193	229	275	341	231	167	185
c1_611_9B1	197	186	251	340	150	193	232	272	356	231	164	185
c1_611_9B2	197	186	251	340	150	197	226	263	356	231	164	185
c1_611_9B3	197	188	251	340	153	197	229	266	356	231	164	182
c1_616_1S1	197	186	251	340	150	191	226	278	353	246	164	185
c1_616_4T1	197	188	251	340	150	191	226	278	356	231	164	185
c1_631_10H1	197	184	251	340	147	193	226	272	356	249	164	185
c1_631_2H1	197	184	251	344	150	193	229	266	356	231	164	185
c1_631_3J1	197	184	251	340	150	193	229	275	356	231	164	185
c1_631_7K1	197	186	251	340	153	197	229	266	356	231	164	170
c1_631_7K2	197	186	251	340	153	193	226	272	356	246	164	185
c1_631_8H1	197	184	251	340	150	197	229	272	356	231	164	185
c1_631_8H2	197	184	251	340	147	193	229	275	356	249	164	185
c1_631_9H1	197	184	251	340	150	191	229	266	356	231	164	185
c1_640_10A1	197	184	251	340	150	191	226	266	353	231	164	185
c1_640_10A2	197	184	251	340	150	191	229	266	353	231	164	185
c1_640_10A3	197	184	251	340	153	193	229	266	353	231	164	182
c1_640_10B3	197	186	251	340	150	193	229	272	347	246	164	182
c1_640_11A1	197	186	251	344	153	193	229	278	356	231	164	185
c1_640_11A2	197	186	251	344	150	193	229	278	356	231	164	185
c1_640_11A3	197	184	251	344	150	191	229	275	356	231	164	185
c1_640_11B1	197	186	251	340	147	191	229	266	359	231	164	185
c1_640_11B3	197	186	251	340	147	193	229	263	359	231	164	185
c1_640_13B1	197	186	251	340	153	191	226	266	359	246	164	179
c1_640_13B2	197	186	251	340	153	191	226	266	359	246	164	179
c1_640_13B3	197	186	251	340	153	193	229	266	359	246	164	179
c1_640_14A2	197	188	251	340	156	193	229	266	359	246	164	176
c1_640_14A3	197	188	251	340	153	193	226	266	359	246	164	179
c1_640_14B1	197	186	251	340	153	193	226	266	359	246	164	179
c1_640_14B2	197	186	251	340	153	193	229	263	356	231	164	182
c1_640_1A1	194	188	251	344	150	193	229	266	356	231	164	185
c1_640_1A2	194	188	251	344	147	193	229	266	356	231	164	185
c1_640_1A3	194	188	251	344	150	193	229	266	356	231	164	185
c1_640_1B1	194	186	251	344	147	193	229	266	359	231	164	185
c1_640_1B2	197	186	251	340	147	191	226	266	359	231	164	185
c1_640_1B3	194	186	251	340	162	195	229	275	359	246	164	182
c1_640_3A1	197	188	251	340	150	193	229	266	359	231	164	185
c1_640_7A3	194	186	251	336	150	193	226	266	353	231	167	197
c1_640_7B1	197	186	251	340	147	193	229	266	359	231	164	185
c1_640_7B2	197	186	251	340	147	191	229	266	359	231	164	185
c1_640_7B3	197	186	251	340	147	191	226	263	359	231	164	185
c1_640_8A2	197	184	251	340	147	197	229	266	356	231	164	185
c1_640_8A3	197	184	248	344	150	193	229	263	356	231	164	185
c1_640_9A1	194	184	251	340	159	193	226	275	359	246	164	185
c1_640_9A2	197	184	257	338	156	197	229	266	356	260	167	185
c1_640_9B1	197	184	248	340	150	193	229	272	356	231	164	185
c1_640_9B2	197	184	248	340	150	191	226	272	356	231	164	185
c1_645_10H1	197	184	251	340	153	191	229	266	356	246	164	197
c1_645_10H2	197	184	251	340	150	197	229	266	356	231	167	185
c1_645_14H1	197	184	251	340	150	197	226	266	356	231	167	185
c1_645_1H1	197	184	251	344	150	197	226	263	356	249	164	197
c1_645_6J1	197	184	251	344	150	191	223	266	356	231	164	197
c1_645_7H1	197	182	251	344	156	191	226	275	356	231	164	191
c1_645_7H2	197	182	251	344	156	191	226	275	356	231	164	191
c1_645_9H1	197	184	251	340	153	193	226	275	353	246	164	185
c1_708_15H1	197	186	251	340	150	191	229	266	356	231	164	185
c1_708_15J1	197	184	251	340	150	197	229	275	356	246	164	185
c1_708_1H1	197	182	251	340	150	193	229	266	356	231	164	185
c1_708_1H2	197	182	251	340	150	193	229	266	356	231	164	185
c1_708_1K1	197	182	251	340	156	193	229	272	356	231	164	185
c1_708_1K2	197	182	251	340	150	193	229	266	356	231	164	185
c1_708_1K3	197	182	251	340	150	193	229	266	356	231	164	185
c1_708_4H1	197	184	251	340	150	197	229	266	362	246	164	185
c1_708_4H2	197	184	251	340	150	197	229	266	362	246	164	185
c1_708_4H3	197	184	251	340	150	199	229	263	362	246	164	185
c1_708_5H1	197	184	251	340	150	193	229	266	359	231	164	185
c1_708_5H2	197	184	251	340	150	191	232	266	359	246	164	185
c1_708_5H3	197	184	251	340	147	191	235	266	359	246	164	185
c1_708_7H1	197	186	251	340	150	193	226	266	356	252	170	185
c1_708_8J1	194	188	251	340	147	191	229	266	356	231	164	185
c1_708_8J2	194	188	251	340	147	193	226	266	356	231	164	185
c1_708_9H1	197	186	248	340	150	193	229	266	356	246	164	185
c1_708_9H2	NA	NA	NA	NA	NA	NA	226	NA	NA	NA	NA	179
c1_708_9J1	197	184	251	340	150	197	229	272	356	246	164	185
c1_709_11A1	197	186	251	344	153	193	229	275	356	231	164	185
c1_709_11A3	197	186	251	344	156	195	229	275	356	231	164	185
c1_709_11B1	197	186	251	340	150	193	229	275	356	246	164	188
c1_709_11B2	194	184	251	344	147	191	229	266	356	231	164	185
c1_709_13A2	197	184	254	344	153	193	229	275	356	231	164	185
c1_709_13A3	197	184	251	344	153	191	229	272	356	231	164	185
c1_709_13B1	197	184	254	344	156	193	229	272	356	231	164	182
c1_709_13B2	194	184	251	344	147	193	229	266	356	231	164	185
c1_709_14A1	194	184	251	344	147	193	229	266	356	231	164	185
c1_709_14B1	197	184	251	340	156	193	229	275	356	231	170	211
c1_709_14B2	197	184	251	340	147	197	229	266	356	231	164	185
c1_709_15A1	197	186	251	340	150	197	229	272	350	231	164	211
c1_709_15A2	200	188	251	340	150	193	229	272	350	246	164	185
c1_709_15B1	200	190	251	340	153	195	229	272	350	246	164	182
c1_709_3A1	197	186	251	344	150	193	229	266	356	246	164	182
c1_709_3A2	197	190	251	344	153	195	229	266	356	231	167	185
c1_709_4A1	197	188	251	340	150	193	229	266	356	246	164	185
c1_709_4A2	197	188	251	340	150	193	229	266	356	246	164	185
c1_709_4A3	197	188	251	340	153	193	229	266	356	246	164	182
c1_709_4B1	194	188	251	344	153	193	229	266	359	246	164	185
c1_709_4B2	197	188	251	344	150	193	229	266	359	246	164	185
c1_709_5A2	197	186	251	344	150	193	226	272	353	246	164	182
c1_709_5A3	197	186	251	344	150	193	226	272	353	246	164	185
c1_709_5B1	197	184	251	340	150	193	229	266	356	246	170	170
c1_709_5B2	197	184	251	340	150	191	229	266	356	246	170	182
c1_709_5B3	197	184	251	340	150	191	229	266	356	246	170	182
c1_709_6A1	197	184	251	340	150	191	235	266	359	246	164	182
c1_709_6A2	197	184	251	340	147	191	235	266	359	246	164	182
c1_709_6A3	194	184	251	344	153	197	229	275	359	231	170	185
c1_709_6B1	197	184	251	344	156	193	229	275	350	231	164	185
c1_709_6B2	197	184	251	344	153	193	226	275	356	231	164	185
c1_709_6B3	197	184	251	344	153	193	229	275	356	231	164	185
c1_709_9A1	197	184	251	340	147	191	232	263	359	246	164	182
c1_709_9A2	197	184	251	340	150	193	235	266	359	246	164	185
c1_709_9B1	197	186	251	342	150	193	235	266	359	246	164	185
c1_709_9B2	197	184	251	340	147	191	232	263	359	246	164	185
c1_724_12A2	197	186	251	340	153	199	229	272	356	231	164	185
c1_724_12B1	197	186	251	340	153	199	229	263	353	231	164	182
c1_724_13A1	197	186	251	340	153	199	229	266	353	231	164	185
c1_724_13A2	197	186	251	340	150	197	226	263	353	231	164	185
c1_724_13A3	197	186	251	340	150	197	226	263	353	231	164	185
c1_724_14B1	197	186	251	340	150	193	229	266	359	228	164	185
c1_724_14B2	194	186	251	344	150	193	229	275	356	231	164	231
c1_724_15A1	197	184	251	344	150	197	229	275	356	231	164	185
c1_724_15A2	197	184	251	340	150	197	229	263	356	231	164	185
c1_724_15A3	197	184	251	344	153	199	229	278	356	231	164	185
c1_724_1A1	197	186	248	340	150	193	229	269	356	231	164	185
c1_724_1B1	197	186	257	340	156	193	229	266	356	246	164	185
c1_724_2A1	197	184	251	340	150	197	226	269	356	231	164	182
c1_724_2A2	197	184	251	340	150	197	226	269	356	231	164	182
c1_724_2A3	197	184	251	340	150	197	226	269	356	231	164	182
c1_724_2B2	197	184	248	344	153	197	229	272	356	231	164	182
c1_724_2B3	197	184	248	344	150	197	229	275	356	231	164	182
c1_724_4A1	197	186	248	340	153	193	229	275	359	231	164	231
c1_724_5B1	194	188	251	340	153	193	229	275	356	246	164	197
c1_724_7A1	197	184	251	340	150	197	226	263	353	231	164	185
c1_724_7A2	197	186	251	340	153	197	229	272	353	231	161	182
c1_724_7A3	197	184	251	340	150	197	226	263	353	231	164	185
c1_724_7B1	197	186	251	340	150	197	229	263	353	231	164	185
c1_724_7B2	197	186	251	340	153	197	229	263	353	231	164	185
c1_724_7B3	197	186	251	340	150	197	229	263	353	231	164	185
c1_724_8B1	197	186	251	340	153	193	229	275	353	231	164	182
c1_724_8B2	197	186	251	340	147	191	226	263	353	246	161	197
c1_85_10A3	197	186	251	340	156	197	235	266	356	231	164	182
c1_85_13A1	197	188	245	340	153	199	229	266	356	231	164	197
c1_85_13A3	197	188	245	340	153	197	229	266	356	231	164	197
c1_85_14A2	197	184	251	340	150	193	226	275	356	246	164	197
c1_85_15A3	197	186	251	340	153	197	229	272	356	231	164	211
c1_85_2B1	197	186	251	340	150	193	229	275	356	246	164	197
c1_85_2B2	197	186	251	340	150	193	229	275	356	231	164	197
c1_85_2B3	197	186	251	340	153	197	229	275	356	246	164	197
c1_85_7A1	197	196	251	344	147	197	226	272	356	231	164	176
c1_85_8A1	197	186	251	340	150	193	229	275	356	246	164	197
c1_85_9A1	197	186	251	340	159	195	229	266	356	231	164	182
c1_85_9A2	197	186	251	340	156	193	229	266	356	231	164	182
c1_85_9A3	197	196	251	340	156	193	229	266	356	231	164	182
c1_85_9B1	197	188	251	340	153	197	229	275	356	231	161	182
c1_85_9B2	197	188	245	340	153	197	229	266	356	231	164	197
c3_119_10A1	194	188	251	340	153	197	229	275	350	246	164	182
c3_119_10A2	194	188	251	340	153	197	229	275	350	246	164	185
c3_119_10A3	194	188	251	340	153	197	229	275	350	246	164	185
c3_119_10B1	197	186	251	340	156	193	229	275	356	231	164	185
c3_119_10B2	191	184	251	340	150	191	229	266	362	246	161	182
c3_119_10B3	197	186	251	340	156	193	229	275	356	231	164	185
c3_119_11A1	197	186	251	344	150	197	229	275	356	246	164	185
c3_119_11A2	197	186	251	344	150	197	229	275	356	246	164	185
c3_119_11A3	197	186	251	344	150	197	229	272	356	246	164	182
c3_119_11B1	197	186	248	340	153	193	229	266	359	246	164	185
c3_119_11B2	197	186	248	340	156	193	229	266	359	246	164	185
c3_119_11B3	197	188	251	340	153	193	229	275	353	246	164	182
c3_119_12A1	197	188	251	340	150	193	229	272	356	231	164	179
c3_119_12A2	197	186	251	346	147	193	229	275	359	246	164	197
c3_119_12B1	197	186	251	340	150	195	229	266	356	231	161	182
c3_119_14A1	197	186	251	340	150	193	226	263	350	231	164	182
c3_119_14A2	197	186	251	340	150	193	229	278	356	231	164	185
c3_119_14B1	197	188	251	344	150	199	229	275	356	231	164	185
c3_119_14B2	197	184	251	344	150	193	229	266	362	231	161	211
c3_119_15A1	197	186	251	340	150	191	229	284	356	231	167	185
c3_119_15A2	197	186	251	340	150	191	229	284	356	231	167	185
c3_119_16A1	194	186	251	340	153	193	229	266	356	231	164	170
c3_119_16A2	197	188	251	344	147	193	229	272	356	246	164	170
c3_119_16B1	197	186	251	340	153	197	229	272	353	249	164	185
c3_119_16B2	197	186	251	340	153	197	229	272	353	249	164	182
c3_119_1A1	197	186	251	340	147	193	229	272	356	246	164	185
c3_119_1A3	197	186	251	340	150	193	229	272	356	246	164	182
c3_119_2A1	197	186	251	340	150	197	229	263	353	246	164	185
c3_119_4A1	197	186	251	340	153	197	229	266	353	246	164	182
c3_119_5A2	197	186	251	344	150	193	229	266	362	231	164	197
c3_119_5A3	197	186	251	344	153	193	229	266	362	231	164	197
c3_119_5B2	197	186	251	340	150	193	229	272	356	231	164	182
c3_119_6A1	194	184	251	340	153	197	226	263	356	231	164	182
c3_119_6B1	197	186	251	340	153	197	229	266	356	231	164	170
c3_119_7A2	197	186	251	344	150	193	229	263	353	231	164	182
c3_119_7B1	197	184	251	344	150	191	226	263	356	231	164	185
c3_119_7B2	197	184	251	344	150	193	226	266	356	231	164	185
c3_119_7B3	197	184	251	342	150	193	229	266	356	231	164	185
c3_119_8A1	197	184	251	344	150	193	226	263	356	231	164	182
c3_119_8B1	197	186	251	344	150	193	229	266	356	231	164	185
c3_119_8B2	197	186	251	344	153	193	229	266	356	228	164	185
c3_119_8B3	197	186	251	344	150	193	229	266	356	231	164	185
c3_119_9B1	197	186	251	340	156	193	226	272	356	246	164	185
c3_119_9B2	197	186	251	340	153	193	229	272	356	246	164	185
c3_135_10B2	197	188	251	340	153	195	229	266	356	231	161	182
c3_135_11A1	194	184	251	340	150	191	229	266	359	231	164	185
c3_135_11A2	194	184	251	340	150	193	229	266	359	231	164	185
c3_135_11B1	194	184	251	340	150	191	229	266	359	231	164	182
c3_135_11B2	194	188	251	340	150	193	229	266	356	231	161	182
c3_135_11B3	194	184	251	340	150	193	229	266	359	231	164	182
c3_135_12A1	197	186	251	334	153	193	229	266	356	231	164	185
c3_135_12A2	197	186	251	334	150	193	226	266	356	231	164	185
c3_135_12A3	197	186	251	334	150	193	226	266	356	231	164	185
c3_135_12B1	194	186	251	340	150	193	229	275	353	231	164	211
c3_135_12B2	194	186	251	340	150	193	229	275	353	231	164	211
c3_135_12B3	194	188	251	342	153	193	232	272	353	231	164	211
c3_135_13B1	197	186	251	340	150	197	229	275	353	231	164	182
c3_135_14A3	197	184	251	340	150	191	226	272	356	246	164	185
c3_135_14B1	197	186	251	340	144	191	229	275	356	246	164	185
c3_135_14B3	197	186	251	340	144	193	229	272	356	246	164	185
c3_135_16A1	197	186	251	340	147	193	229	272	359	246	161	211
c3_135_16B1	194	186	251	340	138	193	229	275	356	249	164	197
c3_135_16D1	194	186	251	340	147	191	226	266	356	231	164	182
c3_135_1A1	194	184	251	340	150	191	226	263	359	231	164	182
c3_135_1A2	194	184	251	340	150	193	229	263	359	231	164	182
c3_135_1A3	194	184	251	340	150	193	226	263	359	231	164	182
c3_135_1B1	197	186	251	340	147	197	226	266	356	231	164	182
c3_135_1B2	197	186	251	340	147	197	229	266	356	231	164	182
c3_135_2A2	197	186	251	344	153	199	229	266	356	231	164	185
c3_135_3A2	194	186	251	344	150	193	229	272	356	231	164	182
c3_135_3B1	194	186	251	340	153	193	229	266	362	246	164	182
c3_135_3B3	194	186	251	340	150	193	226	263	353	231	161	197
c3_135_4A1	197	188	251	344	147	193	229	266	359	231	164	185
c3_135_4A2	197	188	251	344	150	193	229	266	359	231	161	182
c3_135_4A3	197	188	251	344	147	193	226	263	359	231	164	185
c3_135_4B1	197	186	251	340	150	197	229	266	356	249	164	185
c3_135_4B2	197	186	251	340	147	193	229	266	356	231	164	185
c3_135_5A1	197	188	251	340	150	197	229	275	356	231	164	185
c3_135_5A2	197	188	251	340	153	197	229	275	356	231	164	185
c3_135_6A1	197	186	251	344	150	197	229	266	353	246	164	182
c3_135_6A2	197	186	251	344	150	197	226	272	353	246	164	182
c3_135_6A3	197	186	251	344	150	197	229	263	353	246	164	182
c3_135_6B1	197	184	251	340	150	191	229	263	356	231	164	182
c3_135_6B2	197	186	251	344	150	197	226	263	356	246	164	182
c3_135_6B3	197	184	251	340	150	193	229	272	356	231	161	182
c3_135_7A1	197	184	251	340	150	193	226	266	356	231	164	185
c3_135_7A3	197	184	251	340	150	191	226	263	359	231	164	185
c3_135_7B1	197	184	251	340	153	197	226	272	356	246	164	185
c3_135_7B2	197	184	251	340	153	197	229	266	356	246	164	185
c3_135_7B3	197	184	251	340	153	197	229	263	356	246	164	185
c3_135_8A1	197	184	251	340	150	193	226	266	356	231	164	185
c3_135_8B1	197	184	251	344	150	191	229	266	356	231	164	185
c3_135_8B2	197	184	251	344	150	191	229	266	356	231	164	185
c3_135_8B3	197	184	251	340	153	197	229	263	356	231	164	185
c3_135_9B1	197	184	251	340	144	191	229	266	356	231	164	182
c3_135_9B2	197	184	251	340	144	193	226	272	356	246	164	182
c3_135_9B3	197	184	251	340	150	197	232	275	371	231	164	182
c3_137_15A1	194	188	251	340	147	193	229	272	356	231	161	182
c3_137_15B1	194	188	251	344	150	193	232	278	356	231	164	185
c3_137_16A1	197	184	251	340	153	191	229	275	356	231	164	182
c3_137_16B1	194	184	251	344	150	193	229	278	353	252	164	182
c3_137_16B2	194	184	251	344	147	191	226	275	353	249	164	182
c3_137_16B3	194	184	251	344	147	193	226	275	353	249	164	182
c3_137_1A1	197	184	251	338	153	191	232	266	353	231	164	185
c3_137_1A2	197	184	251	340	150	193	232	266	353	231	164	185
c3_137_1A3	197	184	251	340	150	193	232	266	353	231	164	185
c3_137_3A1	194	186	254	344	153	199	229	278	356	231	164	203
c3_137_3A2	194	184	251	344	153	197	229	278	356	231	164	203
c3_137_3A3	194	184	254	344	150	197	229	278	356	231	164	203
c3_137_3B1	197	186	251	344	156	197	226	278	359	231	181	182
c3_137_4A1	197	186	254	340	150	193	232	275	359	246	164	185
c3_137_4B1	197	184	251	340	150	193	226	266	368	231	164	197
c3_137_4B2	197	184	251	340	150	193	226	266	368	231	164	197
c3_137_4B3	197	186	251	340	150	193	229	266	368	231	164	197
c3_137_5A2	197	186	251	340	150	191	229	272	359	246	164	197
c3_137_5A3	197	186	251	340	150	191	229	272	359	246	164	197
c3_137_5B1	197	186	251	340	150	193	229	272	356	231	164	182
c3_137_6A1	197	184	251	340	150	191	229	272	356	231	164	185
c3_137_6A2	197	184	251	340	150	193	226	272	356	231	164	185
c3_137_6A3	197	184	251	340	150	193	226	272	356	231	164	185
c3_137_6B2	197	184	251	340	150	191	229	272	356	231	164	182
c3_137_6B3	197	184	251	340	150	191	229	272	356	231	164	182
c3_137_7A2	197	184	248	344	153	195	229	266	350	246	164	197
c3_137_8A1	197	188	251	344	147	197	229	275	353	243	164	185
c3_137_8A3	197	188	251	344	147	197	229	278	353	243	164	185
c3_137_9A2	197	186	251	334	153	193	229	263	356	231	164	197
c3_137_9B1	197	188	251	332	156	193	229	266	356	231	164	197
c3_14_10A1	197	184	248	340	153	193	229	266	356	231	164	185
c3_14_10A2	197	184	248	340	150	193	226	263	356	231	164	185
c3_14_10A3	197	184	251	340	150	197	229	275	356	246	164	179
c3_14_10B1	197	186	251	340	153	199	229	266	356	243	152	182
c3_14_10B2	197	186	251	340	153	197	229	266	356	243	152	185
c3_14_10B3	197	186	251	340	153	197	229	266	356	243	152	185
c3_14_12A1	197	186	251	340	150	191	226	263	356	231	164	197
c3_14_12A2	197	186	251	340	150	191	226	263	356	231	164	197
c3_14_12B1	197	186	251	338	153	197	229	266	356	231	164	197
c3_14_12C1	185	186	251	340	138	199	229	272	353	231	164	182
c3_14_13A2	197	190	251	344	147	193	229	275	356	231	164	197
c3_14_13A3	197	190	251	344	147	193	229	275	356	231	164	197
c3_14_13B1	197	190	251	344	147	193	229	272	356	231	164	197
c3_14_13B2	197	190	251	344	147	193	229	272	356	231	161	197
c3_14_13B3	197	190	251	344	147	193	229	275	356	231	164	197
c3_14_14A2	197	186	251	340	150	191	235	281	356	231	164	182
c3_14_14A3	197	186	251	344	153	197	229	275	356	231	164	185
c3_14_14B1	197	190	251	340	147	193	229	278	356	246	164	185
c3_14_14B3	197	190	251	340	147	193	229	275	356	246	161	182
c3_14_15A2	194	186	251	340	150	191	226	263	359	246	164	211
c3_14_15A3	197	186	251	340	150	197	229	275	356	231	164	185
c3_14_15B3	194	186	251	340	150	193	229	266	359	246	164	211
c3_14_16A2	197	188	248	344	153	197	229	266	356	231	164	185
c3_14_16A3	197	188	248	344	153	197	229	266	356	231	164	182
c3_14_16B1	197	184	251	340	153	193	229	275	356	246	164	197
c3_14_16B3	197	184	251	340	150	191	229	275	356	246	164	197
c3_14_1A1	197	188	251	340	153	193	229	266	356	246	164	185
c3_14_1A2	197	188	251	340	153	193	229	266	356	246	164	185
c3_14_1B1	194	186	248	340	153	193	229	272	356	231	161	182
c3_14_2A1	197	186	251	340	147	197	226	272	356	231	164	185
c3_14_2A3	197	186	251	340	153	199	229	266	356	231	152	185
c3_14_2B1	197	186	251	340	147	197	226	272	356	231	164	185
c3_14_2B2	197	186	251	340	150	197	229	275	356	231	164	185
c3_14_2B3	197	186	251	340	147	197	229	272	356	231	164	185
c3_14_4A1	197	188	248	344	153	197	229	266	356	231	164	185
c3_14_4B1	197	188	251	344	150	193	229	266	356	231	161	179
c3_14_4B2	194	188	251	340	153	197	229	278	356	231	164	185
c3_14_6A1	194	186	251	340	156	195	229	266	359	246	164	170
c3_14_6A2	197	188	251	340	153	193	229	266	356	231	164	185
c3_14_6A3	197	186	251	340	150	197	229	275	356	231	164	185
c3_14_6B2	197	184	251	340	147	197	226	272	356	231	164	185
c3_14_6B3	197	186	251	340	150	197	229	272	356	231	164	185
c3_14_8A1	197	184	251	340	147	197	226	272	356	231	164	185
c3_14_8A2	197	186	251	340	150	197	229	275	356	231	164	185
c3_14_8A3	197	186	251	340	150	199	229	272	356	231	164	185
c3_14_9A1	197	186	251	340	150	197	229	266	350	266	164	185
c3_158_10A1	197	184	251	340	147	197	229	272	356	246	164	185
c3_158_10A2	197	184	251	340	147	197	229	275	356	246	164	185
c3_158_10C1	197	186	251	340	150	193	229	275	362	246	164	182
c3_158_10C3	197	186	251	340	147	193	229	272	362	246	164	185
c3_158_11A1	197	188	251	340	153	193	229	266	353	246	164	185
c3_158_11B3	197	184	251	340	147	193	229	275	356	246	164	185
c3_158_12B1	197	184	251	340	147	191	229	272	356	246	164	185
c3_158_12B3	197	184	251	340	147	193	226	272	365	231	164	185
c3_158_12C1	197	186	251	340	150	193	229	281	356	246	164	182
c3_158_12C2	197	184	251	340	147	193	226	281	356	246	164	185
c3_158_12C3	194	184	251	340	147	191	226	275	365	231	164	185
c3_158_13B1	197	186	251	340	153	193	229	266	365	246	164	182
c3_158_13B2	197	186	251	340	150	193	226	263	365	246	164	182
c3_158_14B2	197	184	251	340	147	191	229	272	356	246	164	185
c3_158_15B1	194	184	251	340	147	191	229	272	356	246	164	185
c3_158_15B2	194	184	251	340	147	191	229	272	356	246	164	185
c3_158_16A3	197	184	251	340	153	191	229	266	353	231	164	182
c3_158_16B1	197	186	251	340	147	193	229	272	356	246	164	185
c3_158_16B2	197	186	251	340	153	197	226	272	356	246	164	185
c3_158_16B3	197	186	251	340	147	193	229	275	356	246	164	185
c3_158_1B1	197	186	251	340	153	193	229	275	356	231	164	185
c3_158_1B3	197	186	251	340	147	193	229	272	356	231	164	185
c3_158_2A2	197	188	245	340	153	193	232	275	356	246	164	185
c3_158_2A3	197	188	245	340	150	193	232	275	356	246	164	185
c3_158_2B1	197	184	251	340	147	193	229	272	356	246	164	185
c3_158_2B2	197	184	251	344	150	193	226	266	353	231	164	197
c3_158_2B3	197	184	251	340	150	193	229	272	356	246	164	185
c3_158_3A2	197	184	251	340	150	191	226	272	356	246	164	185
c3_158_3A3	197	184	251	340	150	193	226	272	356	246	164	185
c3_158_3B1	197	186	251	340	153	193	NA	NA	NA	NA	NA	NA
c3_158_4A3	194	186	251	344	153	193	229	266	356	231	164	182
c3_158_4B1	194	186	251	340	153	193	229	266	365	231	161	182
c3_158_4B2	194	186	251	340	150	193	229	266	365	231	164	185
c3_158_4B3	194	186	251	340	150	193	229	266	365	231	164	185
c3_158_5A1	197	186	251	340	150	191	229	275	365	231	164	185
c3_158_5A2	197	186	251	340	150	193	226	272	356	246	164	185
c3_158_5A3	197	186	251	340	150	193	229	272	356	246	164	185
c3_158_6A1	194	188	251	340	153	193	229	266	356	231	164	182
c3_158_6B1	197	186	251	340	150	197	229	275	356	231	164	182
c3_158_6B2	197	186	251	340	147	193	229	272	356	246	164	185
c3_158_6B3	197	186	251	340	147	193	229	272	356	246	164	185
c3_158_8B1	197	188	251	340	156	197	229	266	356	231	164	182
c3_158_9A2	197	186	251	346	150	199	229	266	356	246	164	185
c3_158_9C1	197	186	251	344	150	199	229	266	356	231	164	182
c3_158_9C3	197	186	251	344	147	197	229	266	356	231	164	185
c3_18_13J1	197	188	251	344	153	197	229	266	356	266	164	185
c3_18_13K1	197	186	251	340	156	197	229	272	356	231	164	185
c3_18_14H1	197	188	251	340	153	193	229	266	356	231	164	185
c3_18_14J1	194	184	251	340	150	191	229	266	356	266	164	185
c3_18_14K1	197	186	248	340	156	193	229	275	356	231	164	185
c3_18_14K2	197	186	248	340	156	193	229	272	356	231	164	185
c3_18_14L1	197	186	248	340	153	193	226	272	356	231	164	185
c3_18_15K1	197	186	257	340	150	193	229	266	362	263	164	185
c3_18_15L1	197	186	248	340	156	193	229	275	356	231	164	185
c3_18_1H1	197	186	251	340	150	193	226	266	356	231	164	185
c3_18_1H2	197	186	251	340	150	193	229	266	356	231	164	185
c3_18_2K1	197	188	248	340	153	193	226	266	356	266	164	188
c3_18_2K2	197	188	248	340	156	193	229	266	356	231	164	188
c3_18_5K1	197	186	251	344	150	193	226	272	350	231	161	182
c3_18_7J1	194	186	248	340	153	193	235	263	359	234	164	185
c3_2_10B1	197	186	251	340	150	193	229	275	353	231	164	185
c3_2_10B3	197	186	251	340	150	187	229	275	353	231	164	185
c3_2_10C1	197	186	251	340	156	197	229	266	359	231	161	197
c3_2_11B2	197	188	251	344	150	193	229	266	353	231	164	182
c3_2_11B3	197	188	251	344	150	193	229	266	353	231	164	185
c3_2_12A2	197	186	251	340	153	197	229	275	356	249	164	176
c3_2_13A2	194	186	251	340	147	193	229	266	356	231	161	179
c3_2_13A3	194	184	251	340	147	193	229	266	356	231	164	179
c3_2_14A1	197	188	251	340	153	199	229	287	365	231	164	200
c3_2_14A2	197	188	251	340	153	197	229	287	365	231	164	200
c3_2_14B2	197	186	251	340	153	193	229	266	359	231	161	197
c3_2_14B3	197	184	251	340	150	191	229	266	359	231	164	197
c3_2_15A1	197	188	248	340	153	199	229	272	356	231	164	197
c3_2_15A2	197	188	248	340	153	197	229	275	356	231	164	197
c3_2_15B1	197	188	248	340	153	199	229	275	356	231	164	197
c3_2_15B2	197	188	248	340	153	197	229	275	356	231	164	197
c3_2_15B3	197	188	248	340	153	197	229	275	356	231	164	197
c3_2_16A1	197	184	251	340	150	193	229	266	350	231	164	185
c3_2_16B1	197	188	251	340	153	199	229	290	365	231	152	200
c3_2_16B2	197	186	251	344	150	193	226	272	359	249	164	209
c3_2_16B3	197	186	251	340	150	193	229	266	350	231	164	185
c3_2_1A2	197	184	251	340	147	193	226	272	353	231	164	185
c3_2_1B2	197	186	251	340	138	193	229	272	353	231	164	185
c3_2_1B3	197	186	251	340	150	193	229	272	353	231	164	185
c3_2_2A1	197	184	251	340	147	193	226	272	353	231	164	185
c3_2_2A3	197	184	251	340	147	193	229	275	353	231	164	185
c3_2_2B1	197	186	251	340	147	193	229	272	353	231	164	185
c3_2_2B2	197	186	251	340	153	193	229	263	356	246	164	185
c3_2_3A1	197	184	251	340	150	193	229	263	350	231	164	185
c3_2_3A2	197	184	251	340	150	193	226	263	356	246	164	185
c3_2_3A3	197	184	251	344	150	191	229	272	356	246	164	197
c3_2_3B1	197	186	251	344	150	193	229	275	356	246	164	197
c3_2_3B2	197	186	251	340	153	193	229	266	350	231	164	185
c3_2_4A1	197	186	251	340	156	193	229	275	353	231	164	182
c3_2_4A3	197	188	251	340	153	193	229	266	356	231	164	185
c3_2_4B1	197	186	251	340	156	193	229	275	350	231	164	182
c3_2_4B2	197	186	251	340	156	193	229	275	353	231	164	185
c3_2_5A2	197	188	251	340	150	193	229	275	356	231	164	182
c3_2_5B2	197	186	251	340	156	193	229	266	365	231	164	185
c3_2_6A1	197	190	251	340	153	193	229	266	356	231	164	203
c3_2_6A3	197	190	251	340	153	193	229	266	356	231	164	200
c3_2_6B1	197	186	251	340	150	193	229	275	350	231	164	185
c3_2_6B3	197	188	251	340	153	193	229	272	350	231	164	182
c3_2_8A1	197	186	251	340	156	197	229	272	341	231	164	185
c3_2_8A3	197	186	251	340	147	191	226	269	356	231	164	185
c3_2_8B2	197	186	251	340	153	193	229	266	353	249	167	185
c3_2_9A2	197	184	251	344	135	191	226	263	359	231	164	185
c3_2_9B2	197	184	251	344	135	191	229	266	359	231	164	185
c3_237_10A3	197	188	251	340	156	195	226	272	356	231	164	182
c3_237_10B1	197	186	251	340	153	195	226	266	353	231	167	197
c3_237_10B3	197	188	251	340	153	193	229	272	359	249	164	185
c3_237_12A2	197	186	251	340	159	193	229	275	356	228	164	197
c3_237_13A1	194	188	251	340	153	193	229	272	353	231	167	185
c3_237_13A2	194	188	251	340	153	195	229	275	353	231	167	185
c3_237_13B2	194	186	251	340	150	193	229	266	341	231	164	185
c3_237_15A1	197	186	251	340	150	193	229	272	356	246	164	185
c3_237_15A2	197	186	251	340	153	193	229	272	356	246	164	185
c3_237_15B1	197	186	251	342	156	195	229	266	356	249	164	185
c3_237_16A1	197	188	251	340	150	193	226	266	356	231	164	185
c3_237_16B1	197	186	251	340	135	193	226	263	359	249	164	197
c3_237_16B2	197	186	251	340	135	193	226	263	359	249	164	197
c3_237_16B3	197	186	251	340	138	193	229	266	359	249	164	197
c3_237_1B1	197	186	251	340	153	197	229	278	356	231	164	182
c3_237_2A2	197	186	251	340	153	197	229	266	356	243	161	185
c3_237_2A3	197	186	251	340	153	197	229	266	356	243	164	185
c3_237_3A2	197	188	251	340	153	193	229	266	356	231	164	185
c3_237_3B1	197	188	251	344	156	193	229	275	353	231	164	182
c3_237_4A2	197	186	251	344	153	197	229	275	359	246	164	197
c3_237_4A3	197	186	251	344	150	199	229	272	359	246	164	197
c3_237_5B1	194	188	251	344	153	195	229	275	356	231	164	182
c3_237_6A3	197	186	251	340	153	193	229	266	356	246	164	185
c3_237_8A1	197	188	251	340	159	197	229	275	356	249	164	185
c3_237_8A2	197	188	251	340	159	197	226	272	356	249	164	185
c3_237_8B1	197	186	251	340	150	193	229	275	356	246	181	185
c3_237_8B2	197	186	251	342	153	193	226	275	356	246	181	185
c3_237_8B3	197	186	251	340	138	199	229	275	356	231	164	197
c3_237_9A3	197	188	251	344	153	193	229	263	353	231	164	185
c3_237_9B1	197	186	248	340	138	195	226	272	356	231	164	185
c3_237_9B2	197	186	245	340	135	193	229	275	356	231	164	185
c3_25_10A1	197	186	251	344	153	193	229	275	356	246	170	182
c3_25_10B2	194	186	251	340	153	193	229	272	344	231	161	182
c3_25_10B3	194	184	251	340	150	193	229	272	344	231	164	182
c3_25_10C1	197	186	251	340	153	197	229	266	356	231	167	182
c3_25_10C2	194	186	251	340	153	193	229	272	344	231	164	185
c3_25_10C3	194	186	251	340	150	193	229	272	344	231	164	185
c3_25_11A1	197	188	248	340	153	193	229	266	356	231	164	182
c3_25_11A2	197	188	248	340	150	193	229	266	356	231	164	182
c3_25_11A3	197	188	248	340	150	193	226	266	356	231	164	182
c3_25_11A4	197	188	248	340	153	193	229	266	356	231	164	182
c3_25_11B2	197	186	251	340	138	197	229	266	356	231	164	185
c3_25_12A1	197	188	251	344	153	197	229	275	362	231	164	197
c3_25_12A2	197	188	251	344	153	197	229	272	362	231	164	197
c3_25_12B3	197	170	251	340	153	193	229	266	356	231	167	185
c3_25_13A2	197	186	251	340	150	193	226	263	356	246	164	197
c3_25_13A3	197	186	251	340	150	193	229	266	356	246	164	197
c3_25_13B1	197	186	251	340	138	193	229	272	362	231	161	209
c3_25_14A2	197	186	248	344	153	197	229	266	356	231	161	182
c3_25_14B2	197	184	251	340	150	193	229	272	350	231	164	182
c3_25_14B3	197	184	251	340	147	195	229	308	356	231	164	185
c3_25_16A1	197	184	251	340	150	193	226	263	359	231	164	185
c3_25_16A2	197	184	251	340	150	185	226	263	359	231	164	185
c3_25_16B1	197	186	251	344	153	197	229	266	359	231	161	185
c3_25_16B2	197	186	251	344	153	197	229	266	359	231	164	185
c3_25_16B3	197	186	251	344	150	197	229	266	359	231	164	185
c3_25_1A3	197	184	251	340	159	193	229	308	359	231	164	197
c3_25_1B1	197	186	251	340	153	193	226	284	356	266	164	179
c3_25_2A1	197	186	251	340	150	193	226	281	356	246	164	179
c3_25_2A2	197	186	251	340	156	193	226	275	356	246	164	182
c3_25_2A3	197	186	251	340	156	193	226	275	356	246	164	185
c3_25_2B1	197	186	251	340	153	193	226	281	356	266	164	179
c3_25_2B2	197	186	251	340	153	193	226	281	356	266	164	179
c3_25_3A3	197	188	251	340	150	193	232	275	356	231	164	182
c3_25_3B2	197	184	251	340	147	193	232	272	356	231	164	182
c3_25_7A2	197	186	251	340	150	193	229	278	362	231	164	182
c3_25_7B1	197	188	251	340	156	195	235	275	356	246	164	182
c3_25_7B2	197	188	251	340	156	195	232	275	356	246	164	185
c3_25_7B3	197	188	251	344	150	193	229	275	353	231	164	185
c3_25_8A1	197	186	251	340	153	195	235	266	353	231	161	185
c3_25_8A3	197	184	251	340	150	191	235	266	353	231	161	185
c3_25_8B1	197	184	245	340	150	197	226	263	356	231	164	182
c3_25_8B2	197	186	251	340	156	197	229	272	353	231	164	182
c3_25_8B3	197	186	251	340	153	197	229	272	353	231	164	182
c3_25_9A1	197	188	251	340	150	193	229	275	356	246	164	185
c3_25_9A2	197	188	251	340	153	193	229	275	356	246	164	185
c3_25_9A3	197	188	251	340	153	193	229	275	356	246	164	185
c3_290_15J1	197	184	251	340	153	191	229	272	356	246	164	182
c3_335_10A1	194	186	251	340	150	193	229	272	356	231	164	185
c3_335_10A2	197	184	251	340	147	191	229	266	353	246	164	185
c3_335_10B1	194	186	251	340	150	193	226	272	356	231	164	185
c3_335_11A2	197	188	251	344	153	193	229	263	356	231	164	185
c3_335_14B1	197	188	248	344	153	199	226	266	356	231	164	185
c3_335_15A1	197	186	251	344	153	193	229	266	356	246	164	182
c3_335_15B1	197	188	251	344	153	193	229	266	356	231	164	185
c3_335_16A1	197	186	251	340	144	193	229	275	356	231	164	185
c3_335_16A2	194	182	242	344	144	189	229	278	356	231	164	185
c3_335_2B1	197	188	251	346	153	193	226	266	356	231	164	185
c3_335_3A1	197	188	251	340	150	199	235	275	356	246	164	182
c3_335_5A1	197	184	251	340	150	191	229	284	356	231	164	185
c3_335_5A2	194	186	251	344	150	193	229	266	356	246	164	197
c3_335_5B1	194	188	251	340	147	197	229	266	356	231	164	197
c3_335_5B2	194	188	251	340	150	197	229	266	356	231	161	197
c3_335_6B1	197	184	251	340	153	197	229	272	356	246	164	182
c3_335_6B2	197	186	251	340	156	199	229	275	356	246	164	182
c3_335_7A1	197	184	251	340	156	197	226	275	356	246	164	182
c3_335_7A2	197	184	251	344	153	197	229	275	356	246	164	182
c3_335_7A3	197	184	251	344	153	197	229	275	356	246	164	182
c3_335_7B1	197	186	251	338	150	193	223	266	359	231	167	185
c3_335_7B2	197	184	251	340	147	191	226	266	359	231	167	185
c3_335_8A1	197	188	251	344	150	193	229	266	356	231	164	185
c3_335_9A1	197	186	251	344	150	191	229	266	356	231	164	185
c3_335_9A2	197	186	251	344	150	193	229	266	356	231	164	185
c3_335_9A3	197	186	245	340	147	193	226	272	356	231	164	197
c3_335_9B1	197	186	251	340	150	193	226	263	356	231	164	185
c3_438_10A1	197	188	251	340	147	193	232	275	359	246	164	185
c3_438_11A2	194	184	251	340	153	191	226	266	356	246	164	185
c3_438_12A1	197	186	251	340	150	191	229	275	356	231	164	185
c3_438_12A2	197	188	251	340	153	193	226	272	356	231	164	185
c3_438_12B1	194	184	251	340	150	191	229	272	356	231	164	176
c3_438_12B3	194	186	251	340	153	193	229	275	356	231	164	176
c3_438_13A2	197	184	251	340	144	191	229	266	356	231	164	211
c3_438_13A3	197	186	251	340	147	193	229	266	356	231	164	211
c3_438_13B1	197	186	251	340	147	193	235	275	356	246	164	182
c3_438_13B2	197	184	251	340	144	191	235	272	356	246	164	185
c3_438_13B3	197	184	251	340	144	191	235	272	356	246	164	185
c3_438_15A1	197	186	251	340	153	193	226	266	356	231	164	182
c3_438_15A2	197	184	251	340	150	191	226	266	356	231	161	182
c3_438_15B1	197	184	251	340	150	197	229	266	356	231	164	197
c3_438_15B2	197	184	251	340	147	197	226	266	356	231	164	197
c3_438_16A2	194	186	251	340	138	193	229	278	350	246	164	197
c3_438_2A1	197	186	251	340	138	193	226	266	356	231	181	182
c3_438_2A3	194	186	245	338	135	189	226	266	356	231	181	182
c3_438_3A1	197	184	251	340	153	191	229	263	356	246	164	185
c3_438_3A2	197	184	251	340	153	191	229	263	356	246	164	185
c3_438_3A3	197	184	251	340	153	191	229	263	356	246	164	185
c3_438_3B1	197	184	251	340	156	193	226	263	356	246	164	185
c3_438_3B2	197	184	251	340	144	193	235	275	356	246	164	185
c3_438_3B3	197	184	251	340	144	193	235	275	356	246	164	185
c3_438_4A1	197	184	251	340	150	193	229	275	359	231	164	185
c3_438_4A2	197	184	251	340	150	193	226	275	359	231	164	182
c3_438_4A3	197	184	251	340	150	193	226	275	359	231	164	182
c3_438_4B2	197	184	251	344	150	191	226	263	356	246	164	182
c3_438_4B3	197	184	251	344	153	193	226	263	356	246	164	182
c3_438_5A1	197	186	251	340	150	191	226	263	356	231	164	182
c3_438_5A2	197	186	251	340	150	191	226	263	356	231	164	182
c3_438_5A3	197	188	251	340	153	193	229	266	356	231	164	185
c3_438_6B1	197	184	248	338	153	191	226	275	353	231	164	185
c3_438_6B2	197	186	248	340	156	193	229	278	353	231	164	185
c3_438_8A1	197	184	251	340	147	193	232	272	356	246	164	182
c3_438_8A3	197	184	251	340	144	191	232	272	356	246	164	182
c3_438_8B2	197	184	251	340	147	193	235	275	356	246	164	185
c3_438_8B3	197	184	251	340	144	191	235	272	356	246	164	182
c3_438_9A3	197	186	251	340	153	195	229	275	359	246	164	200
c3_438_9B1	197	184	251	338	150	191	226	275	341	231	164	185
c3_438_9B2	197	184	251	340	150	191	226	266	341	231	164	185
c3_438_9B3	197	184	251	340	150	193	229	266	341	231	164	185
c3_439_10B1	197	188	251	340	138	193	229	266	356	246	164	185
c3_439_10B2	197	186	251	338	135	193	226	266	356	246	164	182
c3_439_11A1	197	186	251	340	153	193	226	263	356	231	164	182
c3_439_11A2	197	184	251	340	150	193	226	263	356	231	164	182
c3_439_11B2	197	186	251	344	150	195	235	275	356	246	164	197
c3_439_11B3	197	184	251	340	150	191	226	272	356	231	164	182
c3_439_12A1	197	188	251	340	156	193	229	272	356	231	164	182
c3_439_12A2	197	186	251	342	150	191	229	266	356	231	164	182
c3_439_13A1	197	186	251	340	153	191	226	272	350	231	164	182
c3_439_13B1	197	186	251	344	150	197	226	263	359	231	164	185
c3_439_13B2	197	186	251	340	150	193	229	275	359	246	164	185
c3_439_13B3	197	186	251	340	147	191	229	272	359	246	161	185
c3_439_14A1	197	186	251	340	150	193	226	266	356	231	164	185
c3_439_14B1	197	186	251	340	156	191	229	275	356	231	164	182
c3_439_14B2	197	186	254	340	150	193	226	275	356	246	164	182
c3_439_14B3	197	186	251	340	159	193	226	272	356	246	164	182
c3_439_15A2	197	186	251	340	150	191	226	266	356	231	161	182
c3_439_15A3	197	186	251	340	153	193	226	266	356	231	164	185
c3_439_15B2	197	186	251	340	156	193	226	272	356	231	164	182
c3_439_16A2	197	188	251	340	153	193	226	272	356	231	164	197
c3_439_16A3	197	186	251	340	150	191	226	272	356	231	164	197
c3_439_1A1	197	188	251	340	153	193	229	284	353	231	164	182
c3_439_1A2	197	184	251	340	150	191	226	275	356	231	164	185
c3_439_1B1	197	188	251	340	153	197	229	266	356	231	161	179
c3_439_1B2	194	184	251	344	147	191	229	275	356	243	164	185
c3_439_1B3	197	186	251	340	150	191	226	263	356	231	164	185
c3_439_2A1	197	188	251	340	156	193	226	272	356	231	167	179
c3_439_3A1	197	188	251	342	156	199	229	263	356	231	161	176
c3_439_4A1	194	184	251	344	153	197	229	272	359	246	164	182
c3_439_4A2	194	184	251	344	150	197	229	272	359	246	164	182
c3_439_4A3	194	184	251	344	150	197	229	272	359	246	164	182
c3_439_5A1	197	184	251	344	150	197	229	275	356	231	164	185
c3_439_5A2	197	186	251	344	153	199	229	275	356	231	164	182
c3_439_5B1	197	186	251	340	153	193	229	272	356	246	164	182
c3_439_5B2	197	184	251	340	150	193	226	272	356	246	164	182
c3_439_6A1	197	184	251	340	153	191	226	278	356	231	164	185
c3_439_6A2	197	184	251	340	150	191	226	278	356	231	164	185
c3_439_6A3	197	184	251	338	150	191	229	278	356	231	164	185
c3_439_7A1	194	188	251	340	153	193	229	272	353	231	161	182
c3_439_8A1	197	186	251	340	150	191	226	272	356	246	164	185
c3_439_8A2	197	186	251	340	150	193	226	272	356	246	164	185
c3_439_8A3	197	186	248	340	138	197	229	266	356	231	164	182
c3_439_9A1	197	186	251	344	153	197	229	275	356	231	161	182
c3_45_14B1	197	188	251	340	153	193	229	275	356	246	181	182
c3_45_14B2	197	188	251	340	153	193	229	275	356	246	164	185
c3_45_14B3	197	188	251	340	153	191	229	275	356	246	164	185
c3_45_16A1	197	184	251	340	150	197	229	272	356	231	164	185
c3_45_16B1	197	184	251	340	150	197	229	272	356	231	164	182
c3_45_3A1	194	186	251	340	150	193	229	275	362	246	164	185
c3_45_3A2	194	186	251	340	150	193	229	275	362	246	164	185
c3_45_3A3	194	186	251	340	147	193	229	275	362	246	164	185
c3_45_6A1	194	186	251	340	150	193	229	275	356	231	164	211
c3_45_6A3	197	186	251	344	150	193	229	272	350	246	164	197
c3_45_6B1	197	184	251	344	147	191	229	272	350	246	164	197
c3_45_8A1	197	184	251	340	150	197	229	266	356	231	164	179
c3_458_11A1	197	186	245	340	150	193	226	263	353	231	161	185
c3_458_12A2	197	186	251	344	153	193	226	266	356	231	164	185
c3_458_13B1	197	186	245	340	150	193	226	266	353	231	161	182
c3_458_14A1	197	186	251	340	153	193	229	272	356	231	164	182
c3_458_15A1	197	186	251	340	153	197	229	275	356	231	164	182
c3_458_15A2	197	186	251	340	150	197	229	275	356	231	164	182
c3_458_15A3	197	186	251	340	150	197	229	275	356	231	164	182
c3_458_15B2	197	186	251	340	147	191	226	263	356	231	164	197
c3_458_16A1	197	186	251	340	156	195	229	272	356	246	164	182
c3_458_16A2	197	186	251	340	153	193	229	272	356	231	164	182
c3_458_1A1	197	184	251	340	147	197	226	266	356	231	164	185
c3_458_1A2	197	186	251	340	150	199	229	266	356	263	164	185
c3_458_1B1	197	184	251	340	150	191	229	266	356	231	164	185
c3_458_1B2	197	186	251	340	153	193	229	266	356	263	164	185
c3_458_2A1	197	186	251	340	150	197	229	272	356	231	167	182
c3_458_2A2	197	184	251	340	147	197	226	272	356	231	167	185
c3_458_2B1	197	186	251	340	150	197	244	266	353	246	164	185
c3_458_5A1	194	186	251	340	138	197	229	272	356	231	164	223
c3_458_6A1	197	186	251	340	150	199	226	263	356	263	164	185
c3_458_7A1	197	186	251	340	150	193	229	272	356	243	164	182
c3_458_7A2	197	184	251	340	147	191	226	272	356	243	164	182
c3_458_7B1	197	186	251	340	153	193	229	272	356	231	164	209
c3_458_7B2	197	186	251	340	147	191	229	272	356	231	164	182
c3_458_8A1	197	186	251	340	156	193	229	266	359	246	164	182
c3_458_8B1	197	186	251	340	147	191	229	272	356	231	164	182
c3_458_8B3	197	188	251	340	150	193	226	272	356	231	164	182
c3_458_9A1	197	184	251	340	147	197	229	266	356	231	164	185
c3_458_9A2	197	186	251	340	150	197	229	266	356	231	164	185
c3_458_9B1	197	184	251	340	150	197	229	263	356	231	164	185
c3_470_10A1	197	188	251	340	153	193	229	275	356	231	164	176
c3_470_10B3	197	190	251	340	150	193	229	275	356	252	164	211
c3_470_11A3	197	184	251	344	150	195	229	275	356	249	164	185
c3_470_11B1	197	186	251	340	150	193	229	266	356	252	181	182
c3_470_11B3	197	184	251	340	147	193	226	263	356	249	181	182
c3_470_12A2	197	188	251	340	153	193	226	272	353	231	164	182
c3_470_12B3	197	194	251	340	147	191	232	272	350	231	164	200
c3_470_13B2	197	190	251	340	153	193	226	272	353	231	164	182
c3_470_13B3	197	186	251	344	150	191	226	272	356	231	164	182
c3_470_14B1	197	186	251	344	150	195	226	275	356	246	164	185
c3_470_14B2	197	184	251	344	147	195	229	275	356	246	164	185
c3_470_14B3	197	186	251	344	150	191	229	272	356	231	164	185
c3_470_15A1	197	184	251	340	150	191	232	272	356	243	164	182
c3_470_15A2	197	184	254	340	150	191	232	272	356	243	164	182
c3_470_15A3	197	184	254	340	150	191	232	272	356	243	164	182
c3_470_15B2	197	186	245	340	153	193	229	266	356	231	164	182
c3_470_16A2	197	188	251	340	156	193	229	275	356	243	164	197
c3_470_16A3	197	186	251	340	153	193	229	275	356	243	164	197
c3_470_2A3	197	184	251	340	150	197	229	266	356	231	164	182
c3_470_2B2	194	184	251	340	150	193	229	272	359	246	164	182
c3_470_3B2	194	184	251	340	153	197	229	266	359	231	164	182
c3_470_4A2	194	186	251	340	153	193	229	305	356	246	164	182
c3_470_4B1	197	186	251	340	153	193	229	266	359	231	173	197
c3_470_5A1	197	184	251	344	147	195	229	275	356	246	164	185
c3_470_5A3	197	184	251	340	153	197	229	272	350	231	164	185
c3_470_5B1	197	184	251	332	153	193	229	272	353	231	164	182
c3_470_6A1	197	188	251	344	153	193	229	272	353	231	167	182
c3_470_6A2	197	188	251	340	150	193	229	272	353	231	164	182
c3_470_7A1	197	186	251	344	150	195	226	275	356	246	164	185
c3_470_8A1	197	186	251	344	150	195	226	275	356	246	164	182
c3_470_8A2	197	186	251	344	147	195	226	275	356	246	164	182
c3_470_8B3	197	186	251	334	156	193	229	275	356	231	164	185
c3_470_9B2	197	186	251	340	153	189	229	278	362	231	164	197
c3_470_9B3	197	186	251	340	150	187	229	278	362	231	164	197
c3_51_10A2	194	188	251	340	150	199	226	272	356	231	164	185
c3_51_10A4	194	188	251	340	150	199	229	272	356	231	164	185
c3_51_10B2	197	188	251	340	153	199	229	275	359	231	164	185
c3_51_10B3	197	188	251	340	153	197	229	275	359	231	164	185
c3_51_11A3	197	184	251	340	144	191	226	263	359	231	164	197
c3_51_11B1	197	186	251	340	147	191	226	263	356	246	164	197
c3_51_12A1	197	186	251	340	144	193	229	266	359	231	164	197
c3_51_12A2	197	186	251	340	150	201	229	275	356	246	164	182
c3_51_12A3	197	186	251	340	147	199	229	272	356	246	164	185
c3_51_12B1	197	184	251	340	147	191	229	266	359	231	164	197
c3_51_12B2	197	184	251	340	144	191	226	263	359	231	164	197
c3_51_12B3	194	184	251	340	147	197	229	275	356	246	164	185
c3_51_13A1	197	188	251	340	150	193	226	263	356	246	164	197
c3_51_13A2	197	188	251	340	147	193	229	263	356	246	164	197
c3_51_13C1	197	186	251	334	153	193	229	272	356	231	164	182
c3_51_14B1	197	186	251	340	147	191	226	263	356	246	164	197
c3_51_14B2	197	186	251	340	150	193	229	263	356	246	164	197
c3_51_14B3	197	186	251	340	150	193	226	263	356	246	164	197
c3_51_15A1	197	188	251	340	153	193	235	272	356	231	161	182
c3_51_15A2	197	188	251	340	153	193	235	275	356	231	164	185
c3_51_15A3	197	188	251	340	153	193	235	275	356	231	164	185
c3_51_15B1	197	184	251	340	153	193	229	266	353	231	164	197
c3_51_15B2	197	188	251	340	150	193	229	266	356	246	164	197
c3_51_16A1	197	186	251	340	147	193	229	266	359	231	164	197
c3_51_16A2	197	186	251	340	156	193	229	275	347	231	161	182
c3_51_16B1	197	186	251	334	156	193	229	266	359	231	164	211
c3_51_16B2	197	186	245	340	150	193	229	266	356	246	164	197
c3_51_1B1	197	186	251	340	147	193	229	266	359	231	164	197
c3_51_2A2	197	188	251	344	153	193	229	272	356	231	164	182
c3_51_3A1	194	188	251	340	153	201	229	275	356	231	164	182
c3_51_3A2	197	184	251	340	153	197	229	263	356	231	164	185
c3_51_3A3	197	184	251	340	153	197	229	266	356	231	164	185
c3_51_3B1	197	184	251	340	144	191	226	266	356	231	164	197
c3_51_3B2	194	188	251	340	150	199	229	272	356	231	164	185
c3_51_3B3	197	184	251	340	144	191	226	266	356	231	164	197
c3_51_4A1	197	186	251	340	150	193	229	275	356	246	164	185
c3_51_4A3	197	184	251	340	147	191	226	275	356	246	164	185
c3_51_5A2	197	186	251	340	147	193	229	275	356	246	164	185
c3_51_5A3	197	186	251	340	150	193	232	266	353	231	164	188
c3_51_5B1	197	188	251	340	153	195	229	266	353	263	164	185
c3_51_5B2	197	186	251	340	147	193	226	257	353	225	161	182
c3_51_6A2	197	186	251	340	150	195	229	266	356	263	164	185
c3_51_6A3	197	186	251	340	150	199	226	272	356	231	164	185
c3_51_6B1	197	186	251	340	159	197	229	266	347	231	164	188
c3_51_7A2	197	190	251	340	153	193	241	266	356	231	145	176
c3_51_7A3	197	186	251	340	147	193	229	263	356	246	164	197
c3_51_8A1	197	186	248	340	147	193	229	266	356	231	164	197
c3_51_8A3	197	186	251	344	150	193	229	266	356	246	164	185
c3_51_9A1	197	184	251	344	150	193	226	263	356	246	164	182
c3_51_9A2	197	184	251	340	150	195	229	278	356	246	164	182
c3_515_10A1	194	186	251	340	153	193	229	275	356	231	164	182
c3_515_10A2	197	186	251	340	147	191	229	266	356	246	167	170
c3_515_10B3	197	192	251	340	138	193	229	266	359	231	164	209
c3_515_11A1	194	186	251	340	153	195	229	278	347	246	164	182
c3_515_11A2	194	184	251	340	150	193	229	278	347	246	164	182
c3_515_11B1	197	186	251	340	150	193	229	275	356	231	164	182
c3_515_11C1	197	186	251	340	150	191	229	266	341	231	164	182
c3_515_12A1	197	186	251	344	156	197	229	272	356	231	164	182
c3_515_12A2	197	184	251	344	153	197	229	272	356	231	164	182
c3_515_12A3	197	184	251	344	153	197	229	272	356	231	164	182
c3_515_12B2	197	190	251	340	153	197	229	272	356	246	164	197
c3_515_13B3	194	186	251	340	150	193	229	275	356	231	164	185
c3_515_14B1	197	186	251	340	153	197	229	266	350	246	164	197
c3_515_14B3	197	184	251	340	150	195	229	266	350	246	164	197
c3_515_15A1	197	186	251	340	153	193	229	275	356	243	164	197
c3_515_15A2	197	186	251	340	147	191	229	275	356	231	164	185
c3_515_15B2	194	186	251	340	150	193	226	272	356	231	164	185
c3_515_15B3	194	184	251	340	147	193	229	272	356	231	164	185
c3_515_16B1	194	186	251	340	153	193	229	272	353	252	164	200
c3_515_16B2	194	186	251	340	153	193	229	275	353	252	164	200
c3_515_1B1	197	186	251	340	153	195	229	275	356	231	164	206
c3_515_1B2	197	184	251	340	135	193	229	275	356	231	164	206
c3_515_1B3	197	184	251	338	135	193	229	272	356	231	164	206
c3_515_2B1	197	186	251	344	153	193	229	263	356	231	167	182
c3_515_2B2	197	184	251	340	150	191	229	263	356	231	167	182
c3_515_2B3	197	184	251	340	150	191	229	272	356	231	164	182
c3_515_3A2	197	188	248	340	153	197	229	275	356	252	164	182
c3_515_3B1	197	186	251	340	153	193	229	272	356	246	164	170
c3_515_4A1	197	186	248	340	150	193	229	266	353	246	164	182
c3_515_4A2	197	184	248	340	147	191	229	266	353	246	164	185
c3_515_4A3	197	184	248	338	147	191	229	266	353	246	164	185
c3_515_4B2	194	184	251	344	150	197	229	272	356	231	164	185
c3_515_4B3	194	184	251	344	150	197	229	272	356	231	164	185
c3_515_5A1	197	188	251	340	153	197	229	266	353	246	164	182
c3_515_5B2	197	184	251	340	150	197	229	272	356	246	164	185
c3_515_6A3	197	184	251	340	138	195	229	263	356	231	164	206
c3_515_6B1	194	186	251	340	150	193	226	272	356	231	164	185
c3_515_6B2	194	184	251	340	147	193	229	275	356	231	164	185
c3_515_7A2	197	186	251	340	153	193	229	266	356	246	170	211
c3_515_7B3	194	186	248	340	150	193	229	272	356	246	164	182
c3_515_8B1	197	188	251	340	153	197	232	272	356	231	164	211
c3_515_8B3	197	188	251	340	153	197	229	275	356	231	164	211
c3_515_9B1	197	186	251	340	153	197	229	311	356	231	164	214
c3_517_11A1	197	188	251	344	150	193	229	263	356	231	161	182
c3_517_11A2	197	188	251	344	150	193	229	266	356	231	164	185
c3_517_11A3	197	188	248	342	147	191	229	266	356	231	164	185
c3_517_11B1	197	188	251	344	150	193	226	263	356	231	170	185
c3_517_11B2	197	188	251	340	147	193	229	266	356	246	164	185
c3_517_12A1	197	188	251	340	153	193	226	266	356	252	164	191
c3_517_12B1	197	186	251	340	153	193	229	266	356	246	167	197
c3_517_12B3	197	186	251	340	147	193	229	266	356	246	164	185
c3_517_12H1	197	188	251	340	153	193	235	272	356	231	164	185
c3_517_13B3	197	188	251	340	150	197	229	266	356	231	164	197
c3_517_15A1	194	186	245	340	153	195	229	275	356	246	164	185
c3_517_15B1	194	186	248	340	153	195	229	275	356	246	164	185
c3_517_16A3	197	184	251	340	147	197	229	266	356	231	164	197
c3_517_16B2	197	186	251	340	147	197	226	266	356	231	164	197
c3_517_1A1	197	186	251	340	147	197	226	263	356	231	164	197
c3_517_1B1	197	188	251	344	150	193	229	266	356	231	181	182
c3_517_1B2	197	186	251	344	147	191	229	266	356	231	167	185
c3_517_1B3	197	186	251	340	147	195	229	266	356	231	161	185
c3_517_2A1	197	186	251	340	147	197	229	266	356	231	161	197
c3_517_2A3	197	186	251	340	147	195	229	266	356	246	164	185
c3_517_3A1	197	188	251	340	153	193	232	272	356	231	164	185
c3_517_3A2	197	188	251	340	150	195	229	266	356	246	164	185
c3_517_3A3	197	188	251	340	150	197	229	266	356	246	164	185
c3_517_3B1	197	186	251	344	150	193	229	266	359	231	161	182
c3_517_3B2	197	186	251	340	147	193	229	266	359	231	164	185
c3_517_3B3	197	186	251	344	147	191	229	266	359	231	164	185
c3_517_4A2	197	184	251	340	147	197	229	266	356	231	164	197
c3_517_4A3	197	184	248	340	150	191	229	266	356	246	164	185
c3_517_4B2	197	186	251	332	153	193	229	266	356	231	164	182
c3_517_4B3	197	182	248	340	153	191	229	275	356	231	164	182
c3_517_5A1	197	194	251	340	150	193	229	272	350	231	164	182
c3_517_8A1	197	188	251	344	150	193	229	266	356	231	181	185
c3_517_9A1	197	186	251	340	147	195	229	266	356	246	164	185
c3_517_9A3	197	186	251	340	150	197	229	278	356	246	164	185
c3_517_9B1	197	186	251	340	147	197	229	266	356	231	164	197
c3_541_10A1	197	186	251	340	153	193	229	275	353	231	164	185
c3_541_10A2	197	186	251	340	150	193	229	275	353	231	164	185
c3_541_10A3	197	186	251	340	153	193	229	272	353	231	164	182
c3_541_10B1	200	186	251	340	138	199	229	266	359	249	164	182
c3_541_11A1	194	188	251	342	156	197	229	275	356	246	164	182
c3_541_12A1	197	186	251	340	150	193	229	272	356	246	164	209
c3_541_13A1	194	186	251	340	153	193	235	272	356	246	164	182
c3_541_14A1	194	186	251	340	153	191	235	275	356	246	164	185
c3_541_14B1	197	190	251	344	150	197	229	275	353	246	164	197
c3_541_14B3	197	186	251	340	147	199	229	266	356	231	164	197
c3_541_15A1	194	186	251	344	156	195	229	272	356	231	164	182
c3_541_16A1	197	188	251	340	153	199	229	272	356	231	164	182
c3_541_16B2	197	186	248	340	153	191	247	272	347	231	164	182
c3_541_1A1	197	186	251	340	150	195	229	275	356	231	164	182
c3_541_1A2	197	186	251	340	150	193	229	266	356	246	164	182
c3_541_1B1	197	186	248	340	150	197	229	275	356	246	164	197
c3_541_2B1	197	186	251	340	150	193	229	272	356	246	164	197
c3_541_3A1	194	190	251	340	153	191	226	275	356	231	164	185
c3_541_3A2	194	188	251	340	156	193	229	275	356	231	164	182
c3_541_4A1	197	188	251	344	153	193	229	275	356	231	164	197
c3_541_4B1	197	188	251	340	153	197	229	275	359	231	164	182
c3_541_5A1	197	184	251	340	150	193	229	266	356	231	164	185
c3_541_5A2	197	184	251	340	150	193	229	266	356	231	164	185
c3_541_5A3	197	184	251	340	150	193	229	266	356	231	161	182
c3_541_5B1	194	186	251	344	150	197	229	272	359	246	176	185
c3_541_6A1	197	186	251	340	150	191	226	284	356	228	164	211
c3_541_6A2	197	186	251	340	150	193	229	266	356	231	161	182
c3_541_6B1	197	186	251	340	156	193	232	275	356	246	164	182
c3_541_7A1	200	186	251	334	135	197	235	266	359	246	164	211
c3_541_7A2	200	186	251	334	135	197	232	266	359	246	164	211
c3_541_7A3	200	186	251	332	138	199	235	266	359	246	164	209
c3_541_7B1	194	184	251	340	150	193	226	263	356	246	164	182
c3_541_7B2	194	184	251	340	153	193	229	266	356	246	161	182
c3_541_8A1	197	186	251	338	147	193	226	275	356	243	164	185
c3_541_8A3	197	186	251	344	147	193	229	266	356	231	164	209
c3_541_9A1	197	184	251	338	147	193	229	275	356	243	164	185
c3_541_9A2	197	184	251	338	150	193	229	266	356	231	164	185
c3_541_9A3	197	184	251	340	153	193	226	272	356	231	164	185
c3_541_9B1	197	186	251	340	147	199	226	275	356	246	164	170
c3_541_9B2	194	182	245	336	150	189	226	263	356	246	161	185
c3_571_10A2	197	186	251	340	150	193	229	266	353	231	161	197
c3_571_11B3	197	186	251	340	153	193	229	278	353	231	161	182
c3_571_12A1	197	184	251	342	150	197	229	266	356	231	164	185
c3_571_12A3	197	186	251	344	153	197	229	266	356	231	164	182
c3_571_13A1	197	186	251	344	153	191	229	266	356	231	164	179
c3_571_13A2	197	186	251	340	153	193	229	266	359	246	164	209
c3_571_13B1	197	186	251	344	153	193	226	266	356	231	164	179
c3_571_14A1	197	184	251	340	153	185	229	278	353	231	164	182
c3_571_14B1	194	186	251	340	153	197	229	275	356	246	164	185
c3_571_14B2	194	186	251	340	150	197	226	275	356	246	164	185
c3_571_14B3	194	186	251	340	153	193	229	278	353	231	181	182
c3_571_15A1	197	186	251	340	138	199	229	272	359	249	164	182
c3_571_15A2	197	186	251	340	135	197	226	272	359	249	164	185
c3_571_15B2	194	186	251	340	153	197	229	275	356	246	161	185
c3_571_16A1	197	186	251	334	147	193	229	275	356	246	164	182
c3_571_16A2	197	186	251	334	147	193	229	275	356	246	164	182
c3_571_16B3	197	186	251	340	153	193	229	272	356	231	161	182
c3_571_1A2	194	186	251	340	147	195	232	272	359	231	161	182
c3_571_1A3	194	184	251	340	144	193	229	272	359	231	164	182
c3_571_1B2	197	186	251	340	150	197	235	272	356	231	161	188
c3_571_1B3	197	184	251	340	150	197	235	272	356	231	164	182
c3_571_2A1	200	186	251	332	138	197	235	266	356	246	164	211
c3_571_2A2	194	186	254	340	138	191	229	275	356	246	164	182
c3_571_2A3	194	186	251	338	135	193	229	275	356	246	164	182
c3_571_2B3	197	186	251	340	156	193	229	275	356	246	164	182
c3_571_3B1	197	186	251	340	150	193	229	272	356	231	158	197
c3_571_3B2	197	185	257	344	150	197	226	272	356	228	164	182
c3_571_4A1	194	184	251	344	147	197	229	272	359	231	176	185
c3_571_4A2	194	184	251	344	150	197	229	272	359	246	176	185
c3_571_4B1	197	186	251	344	153	195	229	266	356	231	164	185
c3_571_5B1	197	188	251	340	153	199	229	275	359	231	164	182
c3_571_6B2	197	182	251	338	141	189	229	275	359	228	164	197
c3_571_7A3	197	188	251	344	153	193	229	275	356	231	161	197
c3_571_7B1	197	186	251	340	150	193	229	272	356	246	164	197
c3_571_8A1	197	184	245	338	150	197	229	275	356	228	164	197
c3_571_8A2	194	180	245	340	150	195	229	275	356	228	164	197
c3_571_8A3	197	186	251	340	153	197	229	275	356	246	164	197
c3_571_8B2	197	182	248	338	150	191	229	275	356	228	164	185
c3_571_8B3	197	186	254	340	150	197	229	275	356	231	164	182
c3_571_9A1	200	184	248	344	150	191	235	263	356	228	164	182
c3_571_9B1	197	186	248	340	150	193	229	266	356	231	161	197
c3_571_9B2	197	184	251	344	150	191	226	266	356	228	164	197
c3_571_9B3	197	184	248	340	147	193	229	266	356	228	164	197
c3_580_10A1	197	186	251	340	147	197	229	275	356	231	164	182
c3_580_10A2	197	186	248	340	153	199	229	272	356	231	164	182
c3_580_10A3	197	184	251	340	147	197	226	275	356	231	161	182
c3_580_10B1	194	186	251	344	156	195	229	272	353	231	164	182
c3_580_10B2	197	184	251	344	150	195	229	275	353	231	164	185
c3_580_11A1	197	186	251	342	150	193	226	263	356	231	164	197
c3_580_12A1	197	186	251	344	150	193	229	275	356	231	164	182
c3_580_12A2	197	184	251	344	147	193	229	275	356	231	164	185
c3_580_13A1	197	188	251	340	150	193	229	275	356	246	167	182
c3_580_13A2	197	186	251	340	147	191	229	278	356	246	167	185
c3_580_13A3	197	186	251	338	147	191	229	278	356	246	167	185
c3_580_13B1	197	184	251	340	147	197	229	275	356	246	164	185
c3_580_13B2	194	184	251	340	150	191	229	272	356	231	161	182
c3_580_13B3	197	184	251	340	144	197	229	263	356	231	164	197
c3_580_14A1	197	186	251	342	150	191	229	275	353	246	164	185
c3_580_14A2	197	186	251	340	150	193	229	266	353	231	164	182
c3_580_14B1	197	186	251	340	147	197	229	275	356	231	164	182
c3_580_15A1	197	184	251	344	150	191	229	266	359	246	164	197
c3_580_15A2	197	184	251	340	144	197	229	266	353	231	164	197
c3_580_15A3	197	186	251	340	153	193	229	272	353	231	164	185
c3_580_15B2	197	188	251	340	150	195	226	263	356	246	164	185
c3_580_16B1	197	188	251	340	150	195	229	266	356	246	164	185
c3_580_1A1	197	186	251	338	150	191	229	272	350	246	164	185
c3_580_1A2	197	188	251	344	150	193	229	263	356	231	164	185
c3_580_2A1	197	198	251	340	150	193	229	275	350	231	164	185
c3_580_2B1	197	186	251	340	156	193	229	275	356	231	164	185
c3_580_2B2	197	186	251	334	150	191	226	266	356	231	164	185
c3_580_2B3	197	186	251	334	150	191	229	266	356	231	164	185
c3_580_3A1	197	188	251	340	153	193	229	272	356	231	164	197
c3_580_3A2	197	186	251	334	150	191	226	266	356	231	164	185
c3_580_3B1	197	186	251	340	144	197	229	266	356	231	164	197
c3_580_4A1	197	188	251	340	150	193	235	272	356	231	164	185
c3_580_4A2	197	188	251	340	150	193	235	272	356	231	161	185
c3_580_4B1	197	184	251	340	153	193	229	293	356	246	164	185
c3_580_4B2	197	188	251	340	150	195	229	266	356	246	161	185
c3_580_5A1	197	184	251	340	144	197	226	266	356	231	164	197
c3_580_5A2	197	188	251	344	150	193	229	263	356	231	164	182
c3_580_5A3	197	184	251	340	144	197	226	263	356	231	164	197
c3_580_5B1	197	184	251	340	144	197	226	266	356	231	164	197
c3_580_5B2	197	188	251	340	150	195	229	266	356	246	164	182
c3_580_6A1	197	184	251	340	150	197	229	266	356	231	164	197
c3_580_6A2	197	188	251	340	150	195	229	266	356	246	164	182
c3_580_6B1	197	184	251	340	150	197	229	266	356	231	164	197
c3_580_6B2	197	186	251	340	150	193	229	266	356	246	164	185
c3_580_7A1	194	186	245	340	153	195	229	275	356	246	164	185
c3_580_7A2	197	184	251	338	144	197	229	266	356	231	164	197
c3_580_7B1	194	186	245	340	153	195	229	275	356	246	164	185
c3_580_8A1	197	186	251	340	147	197	226	263	356	231	164	197
c3_580_8A2	197	188	248	340	150	199	229	266	356	231	164	197
c3_580_8B1	197	188	251	340	153	193	235	272	356	231	161	185
c3_580_8B2	197	186	251	338	150	191	235	275	356	234	164	185
c3_580_9A1	197	186	251	340	153	199	229	266	353	246	167	197
c3_580_9A2	197	184	251	340	150	193	226	263	353	246	167	197
c3_580_9A3	197	184	251	340	150	193	229	263	353	246	167	197
c3_59_10B1	197	186	251	340	150	193	229	284	356	246	164	185
c3_59_10B2	197	186	248	340	153	193	220	257	350	237	158	191
c3_59_11A1	197	186	248	340	153	193	229	266	356	246	164	197
c3_59_11A2	197	186	251	340	153	195	229	284	356	246	164	185
c3_59_11A3	197	186	251	340	153	193	229	284	356	246	164	182
c3_59_11B1	197	186	245	340	153	193	226	266	356	246	161	197
c3_59_13B2	197	184	245	340	150	193	226	263	356	246	164	197
c3_59_14A1	197	184	251	344	147	197	226	260	356	246	164	194
c3_59_15A1	197	184	245	340	150	193	229	263	356	246	164	197
c3_59_15B1	197	184	251	340	147	195	229	272	365	231	164	182
c3_59_16A1	197	186	248	340	153	195	229	266	356	246	164	197
c3_59_1A1	197	184	245	340	150	193	226	263	356	246	161	197
c3_59_2A1	197	194	251	340	153	193	229	266	350	231	164	185
c3_59_2A2	197	194	251	340	153	193	229	266	350	231	164	185
c3_59_2A3	194	194	251	340	150	191	229	266	350	231	164	185
c3_59_3A1	197	186	248	340	156	193	229	266	356	246	164	197
c3_59_3A2	197	186	245	340	153	193	226	266	356	246	164	197
c3_59_3B1	197	186	251	340	153	197	229	275	353	246	164	211
c3_59_3B2	197	186	251	340	150	197	229	275	353	246	164	211
c3_59_4B1	197	186	251	340	153	197	229	275	353	246	164	211
c3_59_4B2	197	186	251	340	153	197	229	275	353	246	164	211
c3_59_4B3	197	184	251	340	150	197	226	275	353	246	164	211
c3_59_5B1	197	184	251	340	150	193	226	275	356	246	164	182
c3_59_6A1	197	186	245	340	153	195	229	266	356	246	164	197
c3_59_6B1	194	190	251	340	153	193	229	272	356	246	167	182
c3_59_7A1	197	184	251	340	150	193	229	275	359	246	164	182
c3_59_7B1	197	186	248	340	150	193	229	266	356	246	164	197
c3_59_7B2	197	186	251	340	138	191	229	272	356	231	164	182
c3_59_8A1	197	186	251	340	150	195	229	272	365	231	164	185
c3_59_8A2	197	184	251	340	150	197	229	272	356	246	164	182
c3_59_8B1	197	186	248	340	153	193	229	266	356	246	164	197
c3_59_8B2	197	184	251	340	147	195	226	272	365	231	161	185
c3_59_9A1	197	184	251	340	147	193	226	266	353	243	164	182
c3_59_9A2	197	186	251	340	150	193	229	266	353	246	161	182
c3_59_9B1	197	184	245	340	150	193	226	266	356	246	164	197
c3_59_9B2	197	186	248	340	153	193	229	266	356	246	164	197
c3_611_10A1	197	186	251	340	150	197	229	266	356	252	164	191
c3_611_10A2	197	188	248	340	153	199	229	266	356	252	164	191
c3_611_10B2	194	186	251	340	150	193	229	278	356	231	164	179
c3_611_11A2	197	186	251	344	153	193	229	266	362	231	164	185
c3_611_11A3	194	180	248	340	135	191	229	263	356	231	164	206
c3_611_11B1	197	184	251	340	138	195	229	263	356	231	164	206
c3_611_11B2	197	184	251	344	150	191	229	266	362	231	164	185
c3_611_12A1	197	188	251	342	153	193	229	275	359	246	164	185
c3_611_13B1	197	184	251	340	153	197	229	266	353	246	164	185
c3_611_14A2	197	190	251	340	150	193	229	272	356	231	164	185
c3_611_14A3	197	190	251	340	147	191	229	272	356	231	164	185
c3_611_14B1	197	190	251	340	156	193	229	272	359	231	164	179
c3_611_14B2	197	190	251	340	153	193	229	272	359	231	164	179
c3_611_14B3	197	188	251	340	153	193	229	272	359	231	164	179
c3_611_15A3	197	186	254	340	156	199	229	266	356	231	164	185
c3_611_15B1	197	188	251	340	150	193	226	266	356	231	164	182
c3_611_15B2	197	188	251	340	147	191	229	266	356	231	164	185
c3_611_15B3	197	188	251	340	147	191	229	266	356	231	164	182
c3_611_16A1	197	204	251	340	153	199	229	272	359	246	164	182
c3_611_16A2	194	200	248	338	150	195	229	275	359	246	164	185
c3_611_16A3	197	186	251	344	147	193	232	287	356	246	164	185
c3_611_16B1	194	186	251	340	153	193	229	272	356	249	164	185
c3_611_16B2	194	184	251	340	150	191	229	272	356	249	164	185
c3_611_1A3	197	186	251	340	153	193	235	272	356	231	164	182
c3_611_3A1	197	184	251	340	150	197	229	272	356	231	164	182
c3_611_3A3	197	186	251	340	153	197	220	269	359	222	164	179
c3_611_4B1	194	184	251	340	147	191	229	272	353	249	164	185
c3_611_4B2	194	188	251	340	150	193	220	269	353	240	164	179
c3_611_4B3	191	182	248	340	147	189	229	272	353	249	164	185
c3_611_5A1	197	186	251	340	153	193	229	266	356	231	164	182
c3_611_5A2	197	184	251	340	150	191	229	266	356	231	164	185
c3_611_5A3	194	182	248	338	150	191	229	275	356	231	164	185
c3_611_5B2	197	190	251	346	150	195	229	272	356	263	164	182
c3_611_6A2	197	188	251	340	153	193	229	272	344	231	164	185
c3_611_6A3	197	186	251	338	150	193	226	272	356	246	164	185
c3_611_6B3	197	186	251	338	150	191	229	275	344	231	164	185
c3_611_7A1	197	186	251	334	138	193	229	266	356	252	164	211
c3_611_7A2	197	186	251	334	138	193	229	266	356	252	164	211
c3_611_7A3	197	186	251	332	138	193	229	266	356	252	164	209
c3_611_7B1	197	186	248	344	153	195	229	266	356	231	164	185
c3_611_7B3	197	186	248	344	153	193	229	266	356	231	164	182
c3_611_8A3	197	184	251	340	153	193	229	272	350	231	164	182
c3_611_8B2	197	186	248	344	156	195	229	272	347	231	164	182
c3_611_9A3	197	186	254	340	156	197	229	266	356	231	164	185
c3_611_9B1	197	186	251	344	150	193	229	266	353	231	167	185
c3_611_9B3	197	186	251	342	156	193	229	272	341	231	167	182
c3_631_1H1	194	188	251	340	153	193	229	266	356	231	164	185
c3_631_1J1	197	186	251	340	147	193	229	278	356	246	164	197
c3_631_1J2	197	186	251	340	147	193	229	278	356	246	164	197
c3_631_1J3	197	186	251	340	147	193	229	278	356	246	164	197
c3_631_2J1	194	186	251	340	156	193	229	275	350	231	164	185
c3_631_8H1	197	186	251	340	153	197	229	266	356	246	164	197
c3_631_9L1	197	186	251	340	156	193	247	272	356	246	164	185
c3_64_11Z1	197	186	251	340	156	199	229	266	356	249	164	182
c3_64_16V1	197	188	251	340	153	193	229	278	356	246	164	185
c3_640_11A2	197	186	248	342	153	199	229	272	356	231	164	182
c3_640_11B1	197	186	251	340	153	193	229	266	356	246	164	185
c3_640_11B2	197	186	251	344	153	193	229	275	356	231	164	185
c3_640_11B3	197	186	251	340	156	193	229	272	356	246	164	185
c3_640_12A1	194	186	251	340	153	193	229	266	356	231	164	185
c3_640_12A3	197	186	251	340	153	193	232	272	362	246	164	185
c3_640_12B1	197	190	251	344	147	193	229	272	356	231	164	182
c3_640_12B2	194	186	251	340	153	193	229	266	356	231	164	185
c3_640_12B3	197	188	251	340	153	193	232	278	356	231	167	185
c3_640_13A1	197	188	251	340	153	193	229	275	356	231	167	185
c3_640_13A2	194	186	251	340	156	197	229	275	356	246	164	188
c3_640_13A3	194	186	251	340	156	197	229	275	356	246	164	188
c3_640_13B1	197	184	251	340	138	195	229	263	356	231	164	209
c3_640_14A1	194	186	251	340	156	197	229	275	356	246	164	188
c3_640_14A3	197	186	251	340	153	193	229	266	356	246	164	185
c3_640_14B1	197	186	251	340	153	197	229	275	356	231	164	182
c3_640_15A1	197	186	248	340	150	199	229	266	356	231	164	182
c3_640_15B1	194	186	251	340	156	197	229	275	356	246	164	188
c3_640_1B1	197	186	251	340	150	193	229	272	356	246	167	182
c3_640_2A1	197	186	251	344	153	195	229	272	356	246	173	182
c3_640_2B2	197	188	251	340	153	193	226	272	353	249	164	249
c3_640_3B2	197	186	251	340	153	189	229	266	356	246	164	197
c3_640_3B3	197	188	251	340	153	191	229	266	356	246	164	197
c3_640_4A1	197	186	251	340	150	193	229	266	359	231	164	182
c3_640_4A2	197	188	251	340	150	193	229	266	359	231	164	185
c3_640_4A3	197	188	251	340	150	193	229	266	359	231	164	185
c3_640_5A1	194	190	251	340	150	193	229	266	356	231	164	182
c3_640_5A3	197	186	251	340	153	193	229	266	368	231	164	185
c3_640_5B1	194	190	251	340	147	193	229	266	356	231	164	182
c3_640_5B2	194	190	251	340	150	193	229	266	356	231	164	185
c3_640_5B3	194	190	251	340	150	193	226	266	356	231	164	185
c3_640_5B4	194	190	251	340	150	193	229	266	356	231	164	185
c3_640_6A2	197	188	251	340	150	193	232	275	356	231	161	182
c3_640_6B2	197	188	251	340	150	193	235	275	356	231	164	182
c3_640_7A2	194	186	251	340	156	199	229	272	356	246	164	188
c3_640_7A3	197	186	251	340	153	193	229	266	356	231	164	185
c3_640_8A3	197	186	251	344	153	193	229	266	356	231	164	185
c3_640_8B3	197	188	251	340	156	193	229	266	359	246	164	179
c3_640_9A3	197	186	251	340	156	193	226	278	356	231	164	182
c3_640_9B1	197	186	251	340	153	193	229	263	356	231	161	182
c3_645_11K1	194	186	251	344	156	195	229	266	356	231	164	185
c3_645_16H1	197	186	251	344	156	193	226	275	356	231	170	185
c3_645_16J1	197	186	251	340	153	197	229	275	356	231	164	211
c3_645_1J1	197	186	251	340	147	197	229	266	359	231	164	182
c3_645_8H1	197	188	251	340	153	193	229	275	356	231	164	185
c3_645_8H2	197	188	251	340	153	193	226	275	356	231	164	182
c3_645_8H3	197	188	251	340	153	193	229	275	356	231	164	185
c3_645_8J1	194	190	251	340	153	193	229	263	356	246	164	197
c3_645_8J2	194	188	251	340	153	191	229	266	356	246	164	200
c3_708_16H2	197	184	251	340	153	193	229	266	356	231	161	182
c3_708_16J1	197	186	248	340	156	193	229	266	356	246	164	197
c3_708_16J2	197	186	251	344	153	193	226	263	353	231	167	182
c3_709_10B1	197	186	251	340	153	197	226	272	356	231	164	185
c3_709_10B2	197	186	251	340	153	197	229	275	356	231	164	185
c3_709_11A1	197	186	251	340	150	191	232	263	359	246	164	182
c3_709_11A2	197	186	251	340	150	191	235	266	359	246	164	185
c3_709_12A1	197	186	251	340	150	191	235	266	359	246	164	185
c3_709_13A1	197	186	251	340	150	191	235	263	359	246	164	185
c3_709_13A2	194	186	251	340	153	197	229	275	356	246	164	185
c3_709_13A3	194	186	251	340	153	197	229	275	356	246	164	185
c3_709_14A3	197	186	251	340	150	191	235	266	359	246	164	185
c3_709_16A1	197	184	251	340	153	193	229	266	356	231	164	182
c3_709_16A2	197	186	251	340	153	193	229	266	356	231	164	185
c3_709_16A3	194	186	251	344	153	197	226	278	359	231	170	185
c3_709_1A1	197	186	251	344	150	193	229	272	356	231	167	182
c3_709_1A2	197	186	251	344	153	193	229	275	356	231	167	185
c3_709_1A3	197	186	251	344	153	193	229	275	356	231	167	185
c3_709_1B1	197	186	251	340	150	199	229	266	359	255	164	182
c3_709_2A3	197	188	251	344	153	199	229	275	353	246	170	185
c3_709_3A1	197	186	251	340	150	191	235	266	359	246	164	185
c3_709_3A2	197	186	251	340	150	191	235	266	359	246	164	185
c3_709_4B2	197	186	251	340	150	199	229	266	356	246	164	185
c3_709_6A1	197	186	251	340	156	193	229	272	356	231	164	185
c3_709_6B1	197	186	251	340	159	193	229	275	356	231	164	185
c3_709_7A1	197	190	257	340	153	193	229	275	359	231	164	197
c3_709_7B1	197	188	245	340	153	193	229	266	356	246	161	182
c3_709_7B3	194	184	251	340	153	193	229	278	356	246	164	179
c3_709_8A1	197	186	251	340	150	191	235	266	359	246	164	185
c3_709_8A3	197	186	251	340	153	193	229	266	356	231	164	185
c3_709_8B1	194	186	251	344	153	193	229	272	356	246	164	185
c3_709_8B3	194	186	251	344	153	193	229	272	356	246	164	185
c3_724_16B1	194	186	251	344	153	193	229	275	356	246	164	185
c3_724_16B2	194	186	251	340	150	193	226	275	356	231	167	185
c3_724_2B1	197	188	251	344	150	193	229	266	356	246	164	185
c3_724_2B2	197	188	251	344	150	193	229	266	356	246	164	182
c3_724_2B3	197	188	251	344	150	193	229	266	356	246	164	182
c3_724_8A1	197	184	251	340	153	191	229	275	365	246	164	185
c3_724_8A2	197	186	251	344	153	193	229	272	365	246	164	182
c3_724_8B1	200	188	251	340	150	193	229	254	356	231	164	182
c3_724_8B2	200	186	251	340	150	193	229	254	356	231	164	185
c3_724_8B3	200	188	251	340	150	193	247	272	356	231	164	182
c3_85_11A1	197	186	251	344	156	197	232	278	359	231	167	182
c3_85_11B1	194	186	251	344	150	193	229	272	356	252	164	185
c3_85_11B2	194	186	251	344	147	193	229	272	356	252	164	185
c3_85_11B3	194	184	251	344	147	191	226	272	356	249	161	182
c3_85_13A1	197	186	251	344	156	191	226	275	356	231	161	182
c3_85_13A2	197	184	251	344	153	191	226	275	356	231	164	182
c3_85_13A3	197	186	251	344	156	191	229	275	356	231	164	185
c3_85_2B1	197	186	251	340	153	193	229	275	353	246	164	185
c3_85_2B2	197	186	251	340	156	195	229	275	356	231	164	182
c3_85_2B3	197	188	251	340	144	197	229	275	353	246	167	225
c3_85_9K1	197	184	251	340	153	195	229	266	362	231	164	182
