# Supplementary material for: A novel genome-wide association approach reveals wheat pathogen genes involved in host specialization
Source: Research Square preprint supplement (doi:10.21203/rs.3.rs-4486034/v1), 2024-06-04
Supplement: Supplementary file 8 [file 9f5eeeb5181ba636b866e0ee.xlsx]

## Sheet: Table S8
Table S8: Total number of biallelic SNPs tested
Host phenotypes	Total SNPs
CH CLARO	928182
AUBUSSON	932912
LORENZO	934623
RUNAL	936365
ZINAL	942740
FOREL	948643
AROBASE	951427
ARINA	958708
CH CAMEDO	961853
CH COMBIN	968187
SIMANO	970829
TITLIS	978139
