# Supplementary material for: A novel genome-wide association approach reveals wheat pathogen genes involved in host specialization
Source: Research Square preprint supplement (doi:10.21203/rs.3.rs-4486034/v1), 2024-06-04
Supplement: Supplementary file 9 [file ad014e5aae9394b97fe8bb25.xlsx]

## Sheet: Table S9
Table S9: Candidate loci for host specialization identified in the GWAS analyses.
chr	HOST	gene	start	end	Sequence Description	SP	EffectorP	Significant variant in locus	effect	target_type
1	LORENZO	ZtIPO323_000890	347989	350224	oxysterol-binding protein	N	NA	1	MODIFIER	5_prime_UTR_variant
1	SIMANO	ZtIPO323_003260	1002408	1004307	unnamed protein product	Y	Effector	26	LOW	synonymous_variant
1	SIMANO	ZtIPO323_003260	1002408	1004307	unnamed protein product	Y	Effector	5	MODERATE	missense_variant
1	RUNAL	ZtIPO323_003510	1064708	1069952	unnamed protein product	N	NA	1	MODIFIER	upstream_gene_variant
1	RUNAL	ZtIPO323_003530	1073437	1074716	IBR finger domain protein	N	NA	2	LOW	synonymous_variant
1	AUBUSSON	ZtIPO323_003550	1079654	1081395	transcription factor IIA, alpha/beta subunit	N	NA	1	LOW	synonymous_variant
1	ZINAL	ZtIPO323_003850	1151682	1154092	mfs monocarboxylate transporter like protein	N	NA	1	MODIFIER	5_prime_UTR_variant
1	ARINA	ZtIPO323_004060	1234753	1240263	hsp90-like protein	N	NA	1	LOW	synonymous_variant
1	ARINA	ZtIPO323_005960	1697023	1698276	phosphoglycerate mutase family protein	N	NA	1	MODERATE	missense_variant
1	CH CAMEDO	ZtIPO323_006100	1730925	1732680	alpha/beta hydrolase like protein	N	NA	1	LOW	synonymous_variant
1	CH CAMEDO	ZtIPO323_011010	2863874	2865521	unnamed protein product	N	NA	1	MODIFIER	3_prime_UTR_variant
1	ARINA	ZtIPO323_011950	3070609	3074648	DNA glycosylase	N	NA	3	MODIFIER	upstream_gene_variant
1	ARINA	ZtIPO323_012500	3204610	3207536	bZIP transcription factor	N	NA	9	LOW	synonymous_variant
1	ARINA	ZtIPO323_012500	3204610	3207536	bZIP transcription factor	N	NA	4	MODERATE	missense_variant
1	CH CAMEDO	ZtIPO323_013190	3382411	3383737	mitochondrial 54S ribosomal protein RML2	N	NA	3	MODIFIER	3_prime_UTR_variant
1	FOREL	ZtIPO323_013590	3478163	3482589	c2 domain protein	N	NA	2	LOW	synonymous_variant
1	TITLIS	ZtIPO323_015610	3992794	3995797	elmo ced-12 family protein	N	NA	1	LOW	synonymous_variant
1	LORENZO	ZtIPO323_015740	4033090	4034657	Peroxisomal membrane protein 4	N	NA	1	LOW	synonymous_variant
1	ZINAL	ZtIPO323_016540	4225534	4228078	cutinase-domain-containing protein	Y	NA	1	MODERATE	missense_variant
1	ZINAL	ZtIPO323_018800	4767419	4769774	uncharacterized protein MYCGRDRAFT_107606	N	NA	1	LOW	synonymous_variant
1	SIMANO	ZtIPO323_019050	4821177	4822672	NADPH-dependent medium chain alcohol dehydrogenase	N	NA	5	MODIFIER	5_prime_UTR_variant
1	SIMANO	ZtIPO323_020290	5152455	5156913	DNA repair protein Pso2/Snm1	N	NA	6	MODERATE	missense_variant
1	CH CAMEDO	ZtIPO323_020290	5152455	5156913	DNA repair protein Pso2/Snm1	N	NA	2	LOW	synonymous_variant
1	SIMANO	ZtIPO323_020290	5152455	5156913	DNA repair protein Pso2/Snm1	N	NA	2	LOW	synonymous_variant
1	TITLIS	ZtIPO323_020840	5298572	5299770	7 alpha-cephem-methoxylase protein	N	NA	2	LOW	synonymous_variant
1	RUNAL	ZtIPO323_023030	5815447	5820560	uncharacterized protein MYCGRDRAFT_67605	N	NA	1	LOW	synonymous_variant
2	SIMANO	ZtIPO323_024270	192934	194934	BTB/POZ-like protein	N	NA	1	MODIFIER	3_prime_UTR_variant
2	TITLIS	ZtIPO323_024780	373504	375429	unnamed protein product	N	NA	2	LOW	synonymous_variant
2	SIMANO	ZtIPO323_025130	473884	474822	uncharacterized protein MYCGRDRAFT_19171, partial	N	NA	1	LOW	synonymous_variant
2	ZINAL	ZtIPO323_025710	624711	627450	clathrin-coated vesiclec protein (Bud7)	N	NA	1	MODIFIER	3_prime_UTR_variant
2	RUNAL	ZtIPO323_025750	637823	640653	P-loop containing nucleoside triphosphate hydrolase protein	N	NA	2	MODIFIER	upstream_gene_variant
2	ZINAL	ZtIPO323_025780	648519	649384	---NA---	N	NA	2	MODIFIER	upstream_gene_variant
2	ARINA	ZtIPO323_025980	694660	697556	LON peptidase N-terminal domain and RING finger protein 1	N	NA	1	MODIFIER	3_prime_UTR_variant
2	CH COMBIN	ZtIPO323_026620	855365	856502	riboflavin synthase alpha chain	N	NA	4	MODIFIER	3_prime_UTR_variant
2	CH COMBIN	ZtIPO323_026630	856645	858587	CoA-transferase family III (CaiB/BaiF) like protein	N	NA	8	MODIFIER	upstream_gene_variant
2	ZINAL	ZtIPO323_026730	891553	895950	stress response protein nst1-like	N	NA	4	MODERATE	missense_variant
2	AUBUSSON	ZtIPO323_027040	986528	987947	Snf7-domain-containing protein	N	NA	1	LOW	synonymous_variant
2	AUBUSSON	ZtIPO323_027490	1110959	1114064	Lactose regulatory protein LAC9	N	NA	1	MODERATE	missense_variant
2	CH COMBIN	ZtIPO323_027950	1232279	1233298	Heat shock protein 16	N	NA	1	LOW	synonymous_variant
2	FOREL	ZtIPO323_028950	1466961	1467308	unnamed protein product	Y	NA	3	LOW	synonymous_variant
2	RUNAL	ZtIPO323_029650	1653881	1655833	Orotidine 5'-phosphate decarboxylase	N	NA	2	MODIFIER	3_prime_UTR_variant
2	LORENZO	ZtIPO323_035560	3176877	3181336	DUF221-domain-containing protein	N	NA	1	LOW	synonymous_variant
2	CH CAMEDO	ZtIPO323_037010	3656123	3657967	UV excision repair protein rhp23-like	N	NA	1	MODIFIER	upstream_gene_variant
3	AUBUSSON	ZtIPO323_039470	563169	563495	unnamed protein product	Y	NA	1	MODIFIER	upstream_gene_variant
3	AROBASE	ZtIPO323_040560	933854	938995	FAD/NAD(P)-binding domain-containing protein	N	NA	1	MODIFIER	5_prime_UTR_variant
3	ZINAL	ZtIPO323_040610	947104	948096	uncharacterized protein MYCGRDRAFT_91505	N	NA	1	MODIFIER	5_prime_UTR_variant
3	CH CLARO	ZtIPO323_043660	1772576	1775771	fad binding domain-containing protein	N	NA	1	MODERATE	missense_variant
3	ZINAL	ZtIPO323_044050	1871270	1873335	putative metallocarboxypeptidase ECM14	Y	NA	2	LOW	synonymous_variant
3	ARINA	ZtIPO323_044080	1881440	1884685	unnamed protein product	N	NA	1	MODIFIER	upstream_gene_variant
3	CH COMBIN	ZtIPO323_044690	2029913	2031026	electron transfer flavoprotein subunit beta	N	NA	1	MODIFIER	3_prime_UTR_variant
3	FOREL	ZtIPO323_045220	2156533	2158836	related to adult brain protein 239	N	NA	1	MODIFIER	upstream_gene_variant
3	CH CAMEDO	ZtIPO323_047400	2706582	2708672	fatty-acid amide hydrolase like protein	N	NA	2	LOW	synonymous_variant
3	ZINAL	ZtIPO323_047460	2720381	2723395	Cell division control protein 31	N	NA	2	MODIFIER	3_prime_UTR_variant
3	ZINAL	ZtIPO323_047880	2849396	2852179	uncharacterized protein MYCGRDRAFT_92025	N	NA	1	MODIFIER	5_prime_UTR_variant
3	TITLIS	ZtIPO323_047890	2850874	2852136	unnamed protein product	N	NA	1	LOW	synonymous_variant
3	TITLIS	ZtIPO323_047890	2850874	2852136	unnamed protein product	N	NA	1	MODERATE	missense_variant
3	AROBASE	ZtIPO323_048250	2919596	2922316	alpha/beta-hydrolase like protein	N	NA	2	MODIFIER	upstream_gene_variant
3	ZINAL	ZtIPO323_048290	2934163	2935820	uncharacterized protein MYCGRDRAFT_92053	N	NA	1	LOW	synonymous_variant
3	AUBUSSON	ZtIPO323_048630	3025779	3028181	probable alpha-L-arabinofuranosidase B	Y	Effector	1	MODIFIER	5_prime_UTR_variant
4	SIMANO	ZtIPO323_050720	80930	84531	Agglutinin 2	N	NA	1	LOW	synonymous_variant
4	ARINA	ZtIPO323_051380	385849	391106	unnamed protein product	N	NA	1	MODERATE	missense_variant
4	LORENZO	ZtIPO323_052370	637142	637901	uncharacterized protein MYCGRDRAFT_80332	Y	Effector	1	MODIFIER	upstream_gene_variant
4	AUBUSSON	ZtIPO323_052830	767417	770484	Flap endonuclease GEN 1	N	NA	2	MODIFIER	3_prime_UTR_variant
4	AUBUSSON	ZtIPO323_054120	1090886	1095001	Phosphatidic acid phosphohydrolase 1	N	NA	1	LOW	synonymous_variant
4	ZINAL	ZtIPO323_054280	1146093	1147269	Protein-lysine N-methyltransferase rrg1	N	NA	5	LOW	synonymous_variant
4	ZINAL	ZtIPO323_054280	1146093	1147269	Protein-lysine N-methyltransferase rrg1	N	NA	1	MODERATE	missense_variant
4	ARINA	ZtIPO323_055440	1459944	1461710	nucleotide-diphospho-sugar transferase	N	NA	1	LOW	splice_region_variant&intron_variant
4	ARINA	ZtIPO323_055650	1508156	1509386	uncharacterized protein MYCGRDRAFT_109129	N	NA	2	MODIFIER	upstream_gene_variant
4	TITLIS	ZtIPO323_056350	1741174	1743250	putative peroxiredoxin pmp20	N	NA	2	LOW	synonymous_variant
4	CH CAMEDO	ZtIPO323_059570	2592038	2593542	uroporphyrinogen decarboxylase	N	NA	1	LOW	synonymous_variant
4	ZINAL	ZtIPO323_060390	2788926	2793406	uncharacterized protein MYCGRDRAFT_109316	N	NA	1	MODERATE	missense_variant
4	CH CAMEDO	ZtIPO323_060640	2841232	2842976	unnamed protein product	N	NA	1	LOW	synonymous_variant
5	ZINAL	ZtIPO323_061040	157960	160925	glycoside hydrolase family 31 protein	N	NA	7	LOW	synonymous_variant
5	ZINAL	ZtIPO323_061040	157960	160925	glycoside hydrolase family 31 protein	N	NA	2	MODERATE	missense_variant
5	LORENZO	ZtIPO323_061050	160953	167039	unnamed protein product	Y	NA	1	LOW	synonymous_variant
5	CH CAMEDO	ZtIPO323_061260	260906	268303	unnamed protein product	N	NA	3	MODERATE	missense_variant
5	CH CAMEDO	ZtIPO323_062180	491515	492666	SET domain-containing protein	N	NA	6	LOW	synonymous_variant
5	CH CAMEDO	ZtIPO323_063890	993238	994020	uncharacterized protein MYCGRDRAFT_42625	N	NA	5	MODERATE	missense_variant
5	CH CAMEDO	ZtIPO323_064080	1034363	1037329	uncharacterized protein MYCGRDRAFT_93152	N	NA	2	MODERATE	missense_variant
5	AROBASE	ZtIPO323_064280	1095880	1098076	acid phosphatase like protein	Y	NA	2	MODIFIER	5_prime_UTR_variant
5	CH CAMEDO	ZtIPO323_066870	1678968	1682059	putative RING finger protein	N	NA	4	LOW	synonymous_variant
5	CH CAMEDO	ZtIPO323_066870	1678968	1682059	putative RING finger protein	N	NA	2	MODIFIER	3_prime_UTR_variant
5	CH CAMEDO	ZtIPO323_066870	1678968	1682059	putative RING finger protein	N	NA	1	MODERATE	missense_variant
5	TITLIS	ZtIPO323_067030	1731859	1734579	oligopeptidase family protein	N	NA	2	MODERATE	missense_variant
5	TITLIS	ZtIPO323_067030	1731859	1734579	oligopeptidase family protein	N	NA	1	LOW	synonymous_variant
5	CH CAMEDO	ZtIPO323_068370	2122571	2125326	Heat shock 70 kDa protein	N	NA	5	LOW	synonymous_variant
5	CH COMBIN	ZtIPO323_069830	2554978	2556060	nad dependent epimerase dehydratase like protein	N	NA	1	MODERATE	missense_variant
5	SIMANO	ZtIPO323_070190	2664073	2668105	unnamed protein product	N	NA	1	MODIFIER	upstream_gene_variant
5	CH CAMEDO	ZtIPO323_070380	2731645	2732813	uncharacterized protein MYCGRDRAFT_41701	N	NA	1	LOW	synonymous_variant
6	LORENZO	ZtIPO323_071460	295854	297526	WD40 repeat-like protein	N	NA	1	MODIFIER	upstream_gene_variant
6	CH CAMEDO	ZtIPO323_072700	832584	833237	unnamed protein product	Y	Effector	2	MODERATE	missense_variant&splice_region_variant
6	RUNAL	ZtIPO323_072780	847565	850561	WD40 repeat-like protein	N	NA	1	LOW	synonymous_variant
6	RUNAL	ZtIPO323_072860	871063	874448	DUF221-domain-containing protein	N	NA	1	MODIFIER	3_prime_UTR_variant
6	ARINA	ZtIPO323_073640	1065307	1067391	glycosyltransferase family 22 protein	N	NA	1	MODERATE	missense_variant
6	SIMANO	ZtIPO323_074560	1306960	1309613	putative dipeptidyl peptidase 4	Y	NA	1	LOW	synonymous_variant
6	AUBUSSON	ZtIPO323_075630	1569648	1572321	unnamed protein product	N	NA	2	MODIFIER	3_prime_UTR_variant
6	ARINA	ZtIPO323_077620	2272537	2275933	putative serologically defined colon cancer antigen 1 protein	N	NA	1	MODIFIER	upstream_gene_variant
6	FOREL	ZtIPO323_077820	2324886	2337600	unnamed protein product	N	NA	1	MODERATE	missense_variant
6	FOREL	ZtIPO323_077840	2340075	2342990	cleavage factor two protein 2-like	N	NA	1	LOW	synonymous_variant
6	FOREL	ZtIPO323_077840	2340075	2342990	cleavage factor two protein 2-like	N	NA	1	MODERATE	missense_variant
7	LORENZO	ZtIPO323_079900	272644	275195	uncharacterized protein MYCGRDRAFT_110066	Y	NA	1	MODIFIER	upstream_gene_variant
7	LORENZO	ZtIPO323_079910	275355	276973	Isocitrate dehydrogenase [NAD] subunit 1, mitochondrial	N	NA	1	LOW	splice_region_variant&intron_variant
7	ZINAL	ZtIPO323_080250	380346	382515	F-box domain-containing protein	N	NA	2	MODERATE	missense_variant
7	ARINA	ZtIPO323_080870	530592	531665	Nitronate monooxygenase	N	NA	1	LOW	synonymous_variant
7	AUBUSSON	ZtIPO323_081140	613548	617254	pH-response regulator protein palF/RIM8	N	NA	6	MODIFIER	3_prime_UTR_variant
7	CH CAMEDO	ZtIPO323_081810	854327	856313	Glycerol-3-phosphate dehydrogenase [NAD(+)]	N	NA	1	LOW	synonymous_variant
7	AUBUSSON	ZtIPO323_082510	1030624	1032065	methylthioribose-1-phosphate isomerase	N	NA	1	LOW	synonymous_variant
7	CH CAMEDO	ZtIPO323_082540	1032796	1038928	unnamed protein product	N	NA	3	MODIFIER	3_prime_UTR_variant
7	RUNAL	ZtIPO323_085660	1892112	1894109	---NA---	N	NA	3	MODIFIER	upstream_gene_variant
7	RUNAL	ZtIPO323_085670	1894298	1898425	uncharacterized protein MYCGRDRAFT_100846	N	NA	2	LOW	5_prime_UTR_premature_start_codon_gain_variant
7	RUNAL	ZtIPO323_085670	1894298	1898425	uncharacterized protein MYCGRDRAFT_100846	N	NA	2	MODIFIER	5_prime_UTR_variant
7	RUNAL	ZtIPO323_087360	2249207	2249641	uncharacterized protein MYCGRDRAFT_94772	N	NA	2	MODIFIER	upstream_gene_variant
8	AUBUSSON	ZtIPO323_088890	163785	167156	D-lactate dehydrogenase 2 like protein	N	NA	2	LOW	synonymous_variant
8	AROBASE	ZtIPO323_090590	722433	724293	integral membrane protein YTP1	Y	NA	1	LOW	synonymous_variant
8	AUBUSSON	ZtIPO323_090660	731175	731871	hypothetical protein TI39_contig343g00020	N	NA	1	MODIFIER	upstream_gene_variant
8	ZINAL	ZtIPO323_091850	995441	997073	uncharacterized protein MYCGRDRAFT_110421	N	NA	2	LOW	synonymous_variant
8	ARINA	ZtIPO323_092460	1128398	1130679	BAR-domain-containing protein	N	NA	3	LOW	synonymous_variant
8	ZINAL	ZtIPO323_092550	1147153	1148625	Ribonuclease T2-like	Y	NA	1	LOW	synonymous_variant
8	SIMANO	ZtIPO323_092690	1178777	1180555	Major facilitator superfamily domain-containing protein 10	N	NA	3	MODIFIER	upstream_gene_variant
8	CH CAMEDO	ZtIPO323_093380	1321234	1323531	Enhancer of polycomb-like protein 1	N	NA	1	MODIFIER	upstream_gene_variant
8	ARINA	ZtIPO323_096520	2160879	2168095	SCA7-domain-containing protein	N	NA	1	MODIFIER	upstream_gene_variant
8	AROBASE	ZtIPO323_096780	2258097	2260087	uncharacterized protein MYCGRDRAFT_95467	Y	Effector	2	MODIFIER	upstream_gene_variant
9	SIMANO	ZtIPO323_097110	116935	119770	general substrate transporter	N	NA	3	MODIFIER	upstream_gene_variant
9	AUBUSSON	ZtIPO323_098030	354651	357831	uncharacterized protein MYCGRDRAFT_95556	N	NA	6	LOW	synonymous_variant
9	AUBUSSON	ZtIPO323_098030	354651	357831	uncharacterized protein MYCGRDRAFT_95556	N	NA	6	MODERATE	missense_variant
9	AUBUSSON	ZtIPO323_098040	358044	361779	Ubiquitin-activating enzyme E1 1	N	NA	9	LOW	synonymous_variant
9	CH CAMEDO	ZtIPO323_098840	627717	629487	MFS general substrate transporter	N	NA	5	MODERATE	missense_variant
9	CH CAMEDO	ZtIPO323_098840	627717	629487	MFS general substrate transporter	N	NA	4	LOW	synonymous_variant
9	CH CAMEDO	ZtIPO323_098930	646133	647419	probable dehydrogenase	N	NA	1	MODERATE	missense_variant
9	SIMANO	ZtIPO323_099470	766198	768854	Transcription factor TBF1	N	NA	1	LOW	synonymous_variant
9	CH COMBIN	ZtIPO323_099750	840252	842459	apses transcription factor like protein	N	NA	1	MODIFIER	5_prime_UTR_variant
9	ZINAL	ZtIPO323_101090	1202724	1204415	CoA transferase like protein	N	NA	1	LOW	synonymous_variant
9	CH CAMEDO	ZtIPO323_101920	1477540	1480740	DDHD domain-containing protein	N	NA	2	LOW	synonymous_variant
9	RUNAL	ZtIPO323_102580	1646494	1648399	unnamed protein product	N	NA	4	MODIFIER	5_prime_UTR_variant
9	TITLIS	ZtIPO323_103170	1802458	1804417	aldehyde dehydrogenase	N	NA	3	LOW	synonymous_variant
9	SIMANO	ZtIPO323_103360	1900181	1902665	---NA---	N	NA	1	MODIFIER	3_prime_UTR_variant
9	ARINA	ZtIPO323_103460	1924641	1930752	Septation initiation network scaffold protein cdc11	N	NA	1	LOW	synonymous_variant
9	FOREL	ZtIPO323_103600	1983160	1986642	putative tRNA(Ile)-lysidine synthase	N	NA	1	MODERATE	missense_variant
9	AROBASE	ZtIPO323_103700	2022708	2024927	unnamed protein product	N	NA	7	LOW	synonymous_variant
9	AROBASE	ZtIPO323_103700	2022708	2024927	unnamed protein product	N	NA	4	MODERATE	missense_variant
9	AROBASE	ZtIPO323_103800	2044671	2048489	denn domain-containing protein	N	NA	1	LOW	synonymous_variant
10	CH CAMEDO	ZtIPO323_104720	169724	171984	E3 ubiquitin-protein ligase	N	NA	2	LOW	synonymous_variant
10	LORENZO	ZtIPO323_105510	354137	355729	uncharacterized protein MYCGRDRAFT_96097	N	NA	1	LOW	synonymous_variant
10	LORENZO	ZtIPO323_105510	354137	355729	uncharacterized protein MYCGRDRAFT_96097	N	NA	1	MODERATE	missense_variant
10	CH CAMEDO	ZtIPO323_105770	417992	419243	putative tartrate dehydrogenase/decarboxylase TtuC'	N	NA	11	MODIFIER	upstream_gene_variant
10	ARINA	ZtIPO323_105800	421743	423174	putative methyltransferase-like protein	N	NA	2	LOW	synonymous_variant
10	LORENZO	ZtIPO323_106080	496842	499424	unnamed protein product	N	NA	1	LOW	synonymous_variant
10	CH CAMEDO	ZtIPO323_106090	499619	500851	uncharacterized protein MYCGRDRAFT_96138	N	NA	3	MODIFIER	5_prime_UTR_variant
10	CH CAMEDO	ZtIPO323_106220	535917	536486	AvrStb6	Y	Effector	2	LOW	5_prime_UTR_premature_start_codon_gain_variant
10	LORENZO	ZtIPO323_106710	643115	646062	putative map kinase kinase protein	N	NA	4	LOW	synonymous_variant
10	LORENZO	ZtIPO323_106710	643115	646062	putative map kinase kinase protein	N	NA	4	MODERATE	missense_variant
10	ZINAL	ZtIPO323_106720	646003	648226	unnamed protein product	N	NA	2	MODIFIER	5_prime_UTR_variant
10	LORENZO	ZtIPO323_106760	655193	656666	unnamed protein product	N	NA	1	MODIFIER	3_prime_UTR_variant
10	LORENZO	ZtIPO323_107310	779865	782473	P-loop containing nucleoside triphosphate hydrolase protein	N	NA	1	MODIFIER	5_prime_UTR_variant
10	FOREL	ZtIPO323_107420	800963	803112	alkanesulfonate monooxygenase	N	NA	2	MODIFIER	upstream_gene_variant
10	CH CAMEDO	ZtIPO323_108290	1024847	1030206	putative ABC transporter	N	NA	1	LOW	synonymous_variant
10	AUBUSSON	ZtIPO323_108920	1201093	1205375	manganese-transporting ATPase 1-like	N	NA	1	LOW	synonymous_variant
10	TITLIS	ZtIPO323_109450	1377321	1378660	major royal jelly protein	Y	NA	1	MODIFIER	upstream_gene_variant
11	RUNAL	ZtIPO323_112650	639882	640538	hypothetical protein TI39_contig348g00003	N	NA	2	MODERATE	missense_variant
11	RUNAL	ZtIPO323_112650	639882	640538	hypothetical protein TI39_contig348g00003	N	NA	1	LOW	synonymous_variant
11	LORENZO	ZtIPO323_112730	652974	657701	unnamed protein product	N	NA	1	LOW	synonymous_variant
11	LORENZO	ZtIPO323_112730	652974	657701	unnamed protein product	N	NA	1	MODERATE	missense_variant
11	LORENZO	ZtIPO323_113790	928069	930969	Conserved oligomeric Golgi complex subunit 3	N	NA	1	LOW	synonymous_variant
12	LORENZO	ZtIPO323_116570	144900	147617	putative inactive serine/threonine-protein kinase scy1	N	NA	8	LOW	synonymous_variant
12	LORENZO	ZtIPO323_116570	144900	147617	putative inactive serine/threonine-protein kinase scy1	N	NA	1	MODERATE	missense_variant
12	SIMANO	ZtIPO323_117100	249242	253708	nuclear pore complex subunit Nup133-like protein	N	NA	1	LOW	synonymous_variant
12	TITLIS	ZtIPO323_117320	300612	301857	NAD(P)-binding protein	N	NA	1	LOW	synonymous_variant
12	LORENZO	ZtIPO323_119830	964929	967415	unnamed protein product	N	NA	3	LOW	synonymous_variant
12	AUBUSSON	ZtIPO323_120320	1094125	1095087	thioesterase superfamily protein	N	NA	1	MODIFIER	5_prime_UTR_variant
12	CH CAMEDO	ZtIPO323_121290	1311849	1315369	ATP-dependent RNA helicase DOB1 like protein	N	NA	3	LOW	synonymous_variant
13	AUBUSSON	ZtIPO323_123390	459456	462088	uncharacterized RING finger protein P8B7.23-like	N	NA	1	MODIFIER	upstream_gene_variant
13	AUBUSSON	ZtIPO323_123760	543080	546429	glycosyltransferase family 39 protein	N	NA	1	MODIFIER	upstream_gene_variant
13	SIMANO	ZtIPO323_123850	561745	562876	uncharacterized protein MYCGRDRAFT_97382	N	NA	1	LOW	synonymous_variant
13	FOREL	ZtIPO323_124130	616467	618592	DNA lyase-like protein	N	NA	1	LOW	synonymous_variant
13	ZINAL	ZtIPO323_124350	666477	670884	Histone-lysine N-methyltransferase, H3 lysine-36 specific	N	NA	1	LOW	synonymous_variant
13	CH CAMEDO	ZtIPO323_124970	823353	825308	Protein kinase domain containing protein	N	NA	4	MODIFIER	3_prime_UTR_variant
13	CH CAMEDO	ZtIPO323_125100	855932	861823	---NA---	N	NA	2	MODIFIER	5_prime_UTR_variant
13	RUNAL	ZtIPO323_125950	1134425	1136228	AMP-dependent synthetase/ligase	N	NA	1	LOW	synonymous_variant
