# Supplementary material for: A novel genome-wide association approach reveals wheat pathogen genes involved in host specialization
Source: Research Square preprint supplement (doi:10.21203/rs.3.rs-4486034/v1), 2024-06-04
Supplement: Supplementary file 10 [file be66a1cae8a3dfd4b2eceb26.xlsx]

## Sheet: Table S1
Table S1: List of Zymoseptoria tritici isolates included in this project.
Isolate ID	Collection	Wheat Cultivar	Plot ID	Leaf ID	Lesion ID	Country	Sampling site	Sampling date	Year	Fungicide treatment	Alternative name	NCBI bioproject ID	Multilocus genotype (MLG)	Final genomic dataset	IsolateID
c1_119_10A1	c1	CH CLARO	119	10	A	Switzerland	Eschikon field station	20.05.2016	2016	Input (Bayer, 06.04.2016)	NA	NA	1579	NA	c1_119_10A1
c1_119_11A1	c1	CH CLARO	119	11	A	Switzerland	Eschikon field station	20.05.2016	2016	Input (Bayer, 06.04.2016)	NA	NA	1092	NA	c1_119_11A1
c1_119_11A2	c1	CH CLARO	119	11	A	Switzerland	Eschikon field station	20.05.2016	2016	Input (Bayer, 06.04.2016)	NA	NA	1393	NA	c1_119_11A2
c1_119_11A3	c1	CH CLARO	119	11	A	Switzerland	Eschikon field station	20.05.2016	2016	Input (Bayer, 06.04.2016)	NA	NA	1036	NA	c1_119_11A3
c1_119_11B1	c1	CH CLARO	119	11	B	Switzerland	Eschikon field station	20.05.2016	2016	Input (Bayer, 06.04.2016)	NA	NA	1097	NA	c1_119_11B1
c1_119_11B2	c1	CH CLARO	119	11	B	Switzerland	Eschikon field station	20.05.2016	2016	Input (Bayer, 06.04.2016)	NA	NA	1029	NA	c1_119_11B2
c1_119_12A1	c1	CH CLARO	119	12	A	Switzerland	Eschikon field station	20.05.2016	2016	Input (Bayer, 06.04.2016)	NA	NA	1284	NA	c1_119_12A1
c1_119_12A2	c1	CH CLARO	119	12	A	Switzerland	Eschikon field station	20.05.2016	2016	Input (Bayer, 06.04.2016)	NA	NA	1284	NA	c1_119_12A2
c1_119_12A3	c1	CH CLARO	119	12	A	Switzerland	Eschikon field station	20.05.2016	2016	Input (Bayer, 06.04.2016)	NA	NA	1321	NA	c1_119_12A3
c1_119_13B1	c1	CH CLARO	119	13	B	Switzerland	Eschikon field station	20.05.2016	2016	Input (Bayer, 06.04.2016)	NA	NA	1010	NA	c1_119_13B1
c1_119_13B2	c1	CH CLARO	119	13	B	Switzerland	Eschikon field station	20.05.2016	2016	Input (Bayer, 06.04.2016)	NA	NA	1222	NA	c1_119_13B2
c1_119_13B3	c1	CH CLARO	119	13	B	Switzerland	Eschikon field station	20.05.2016	2016	Input (Bayer, 06.04.2016)	NA	NA	1222	NA	c1_119_13B3
c1_119_14A1	c1	CH CLARO	119	14	A	Switzerland	Eschikon field station	20.05.2016	2016	Input (Bayer, 06.04.2016)	NA	NA	408	NA	c1_119_14A1
c1_119_14A2	c1	CH CLARO	119	14	A	Switzerland	Eschikon field station	20.05.2016	2016	Input (Bayer, 06.04.2016)	NA	NA	893	NA	c1_119_14A2
c1_119_15A1	c1	CH CLARO	119	15	A	Switzerland	Eschikon field station	20.05.2016	2016	Input (Bayer, 06.04.2016)	NA	NA	1279	NA	c1_119_15A1
c1_119_15B1	c1	CH CLARO	119	15	B	Switzerland	Eschikon field station	20.05.2016	2016	Input (Bayer, 06.04.2016)	ST16CH_1G47	SRR10728834	1534	NA	c1_119_15B1
c1_119_1A1	c1	CH CLARO	119	1	A	Switzerland	Eschikon field station	20.05.2016	2016	Input (Bayer, 06.04.2016)	NA	NA	669	NA	c1_119_1A1
c1_119_1A2	c1	CH CLARO	119	1	A	Switzerland	Eschikon field station	20.05.2016	2016	Input (Bayer, 06.04.2016)	NA	NA	399	NA	c1_119_1A2
c1_119_1A3	c1	CH CLARO	119	1	A	Switzerland	Eschikon field station	20.05.2016	2016	Input (Bayer, 06.04.2016)	NA	NA	661	NA	c1_119_1A3
c1_119_1B1	c1	CH CLARO	119	1	B	Switzerland	Eschikon field station	20.05.2016	2016	Input (Bayer, 06.04.2016)	NA	NA	663	NA	c1_119_1B1
c1_119_1B2	c1	CH CLARO	119	1	B	Switzerland	Eschikon field station	20.05.2016	2016	Input (Bayer, 06.04.2016)	NA	NA	673	NA	c1_119_1B2
c1_119_1B3	c1	CH CLARO	119	1	B	Switzerland	Eschikon field station	20.05.2016	2016	Input (Bayer, 06.04.2016)	NA	NA	673	NA	c1_119_1B3
c1_119_2A1	c1	CH CLARO	119	2	A	Switzerland	Eschikon field station	20.05.2016	2016	Input (Bayer, 06.04.2016)	NA	NA	1336	NA	c1_119_2A1
c1_119_2A2	c1	CH CLARO	119	2	A	Switzerland	Eschikon field station	20.05.2016	2016	Input (Bayer, 06.04.2016)	ST16CH_1G8	SRR10728833	839	NA	c1_119_2A2
c1_119_2B1	c1	CH CLARO	119	2	B	Switzerland	Eschikon field station	20.05.2016	2016	Input (Bayer, 06.04.2016)	NA	NA	1366	NA	c1_119_2B1
c1_119_2B2	c1	CH CLARO	119	2	B	Switzerland	Eschikon field station	20.05.2016	2016	Input (Bayer, 06.04.2016)	NA	NA	1371	YES	c1_119_2B2
c1_119_3A1	c1	CH CLARO	119	3	A	Switzerland	Eschikon field station	20.05.2016	2016	Input (Bayer, 06.04.2016)	NA	NA	1445	YES	c1_119_3A1
c1_119_4B1	c1	CH CLARO	119	4	B	Switzerland	Eschikon field station	20.05.2016	2016	Input (Bayer, 06.04.2016)	NA	NA	662	YES	c1_119_4B1
c1_119_5A1	c1	CH CLARO	119	5	A	Switzerland	Eschikon field station	20.05.2016	2016	Input (Bayer, 06.04.2016)	NA	NA	53	YES	c1_119_5A1
c1_119_5A2	c1	CH CLARO	119	5	A	Switzerland	Eschikon field station	20.05.2016	2016	Input (Bayer, 06.04.2016)	NA	NA	95	NA	c1_119_5A2
c1_119_5A3	c1	CH CLARO	119	5	A	Switzerland	Eschikon field station	20.05.2016	2016	Input (Bayer, 06.04.2016)	NA	NA	84	NA	c1_119_5A3
c1_119_6A1	c1	CH CLARO	119	6	A	Switzerland	Eschikon field station	20.05.2016	2016	Input (Bayer, 06.04.2016)	NA	NA	1442	YES	c1_119_6A1
c1_119_6B1	c1	CH CLARO	119	6	B	Switzerland	Eschikon field station	20.05.2016	2016	Input (Bayer, 06.04.2016)	NA	NA	1369	YES	c1_119_6B1
c1_119_6B2	c1	CH CLARO	119	6	B	Switzerland	Eschikon field station	20.05.2016	2016	Input (Bayer, 06.04.2016)	NA	NA	1503	NA	c1_119_6B2
c1_119_6B3	c1	CH CLARO	119	6	B	Switzerland	Eschikon field station	20.05.2016	2016	Input (Bayer, 06.04.2016)	NA	NA	699	NA	c1_119_6B3
c1_119_7A1	c1	CH CLARO	119	7	A	Switzerland	Eschikon field station	20.05.2016	2016	Input (Bayer, 06.04.2016)	NA	NA	361	YES	c1_119_7A1
c1_119_7A2	c1	CH CLARO	119	7	A	Switzerland	Eschikon field station	20.05.2016	2016	Input (Bayer, 06.04.2016)	NA	NA	619	NA	c1_119_7A2
c1_119_7A3	c1	CH CLARO	119	7	A	Switzerland	Eschikon field station	20.05.2016	2016	Input (Bayer, 06.04.2016)	NA	NA	590	NA	c1_119_7A3
c1_119_7B1	c1	CH CLARO	119	7	B	Switzerland	Eschikon field station	20.05.2016	2016	Input (Bayer, 06.04.2016)	NA	NA	512	YES	c1_119_7B1
c1_119_7B2	c1	CH CLARO	119	7	B	Switzerland	Eschikon field station	20.05.2016	2016	Input (Bayer, 06.04.2016)	NA	NA	485	NA	c1_119_7B2
c1_119_7B3	c1	CH CLARO	119	7	B	Switzerland	Eschikon field station	20.05.2016	2016	Input (Bayer, 06.04.2016)	NA	NA	479	NA	c1_119_7B3
c1_119_8A2	c1	CH CLARO	119	8	A	Switzerland	Eschikon field station	20.05.2016	2016	Input (Bayer, 06.04.2016)	NA	NA	829	NA	c1_119_8A2
c1_119_9A1	c1	CH CLARO	119	9	A	Switzerland	Eschikon field station	20.05.2016	2016	Input (Bayer, 06.04.2016)	NA	NA	1394	YES	c1_119_9A1
c1_119_9A2	c1	CH CLARO	119	9	A	Switzerland	Eschikon field station	20.05.2016	2016	Input (Bayer, 06.04.2016)	NA	NA	1554	NA	c1_119_9A2
c1_119_9A3	c1	CH CLARO	119	9	A	Switzerland	Eschikon field station	20.05.2016	2016	Input (Bayer, 06.04.2016)	NA	NA	1559	NA	c1_119_9A3
c1_119_9B1	c1	CH CLARO	119	9	B	Switzerland	Eschikon field station	20.05.2016	2016	Input (Bayer, 06.04.2016)	ST16CH_1G30	SRR10728836	NA	YES	c1_119_9B1
c1_119_9B2	c1	CH CLARO	119	9	B	Switzerland	Eschikon field station	20.05.2016	2016	Input (Bayer, 06.04.2016)	NA	NA	323	YES	c1_119_9B2
c1_135_11B2	c1	ZINAL	135	11	B	Switzerland	Eschikon field station	20.05.2016	2016	Input (Bayer, 06.04.2016)	ST16CH_1H32	SRR10728831	1203	YES	c1_135_11B2
c1_135_12A2	c1	ZINAL	135	12	A	Switzerland	Eschikon field station	20.05.2016	2016	Input (Bayer, 06.04.2016)	NA	NA	18	YES	c1_135_12A2
c1_135_13A1	c1	ZINAL	135	13	A	Switzerland	Eschikon field station	20.05.2016	2016	Input (Bayer, 06.04.2016)	ST16CH_1H34	SRR10728830	1447	NA	c1_135_13A1
c1_135_14A1	c1	ZINAL	135	14	A	Switzerland	Eschikon field station	20.05.2016	2016	Input (Bayer, 06.04.2016)	NA	NA	533	NA	c1_135_14A1
c1_135_14A2	c1	ZINAL	135	14	A	Switzerland	Eschikon field station	20.05.2016	2016	Input (Bayer, 06.04.2016)	NA	NA	648	NA	c1_135_14A2
c1_135_14A3	c1	ZINAL	135	14	A	Switzerland	Eschikon field station	20.05.2016	2016	Input (Bayer, 06.04.2016)	NA	NA	1163	NA	c1_135_14A3
c1_135_14B2	c1	ZINAL	135	14	B	Switzerland	Eschikon field station	20.05.2016	2016	Input (Bayer, 06.04.2016)	NA	NA	249	YES	c1_135_14B2
c1_135_14B3	c1	ZINAL	135	14	B	Switzerland	Eschikon field station	20.05.2016	2016	Input (Bayer, 06.04.2016)	NA	NA	264	NA	c1_135_14B3
c1_135_15A1	c1	ZINAL	135	15	A	Switzerland	Eschikon field station	20.05.2016	2016	Input (Bayer, 06.04.2016)	NA	NA	1071	NA	c1_135_15A1
c1_135_15A2	c1	ZINAL	135	15	A	Switzerland	Eschikon field station	20.05.2016	2016	Input (Bayer, 06.04.2016)	NA	NA	474	NA	c1_135_15A2
c1_135_15A3	c1	ZINAL	135	15	A	Switzerland	Eschikon field station	20.05.2016	2016	Input (Bayer, 06.04.2016)	NA	NA	466	NA	c1_135_15A3
c1_135_15B1	c1	ZINAL	135	15	B	Switzerland	Eschikon field station	20.05.2016	2016	Input (Bayer, 06.04.2016)	NA	NA	1202	NA	c1_135_15B1
c1_135_15B2	c1	ZINAL	135	15	B	Switzerland	Eschikon field station	20.05.2016	2016	Input (Bayer, 06.04.2016)	NA	NA	526	YES	c1_135_15B2
c1_135_15B3	c1	ZINAL	135	15	B	Switzerland	Eschikon field station	20.05.2016	2016	Input (Bayer, 06.04.2016)	NA	NA	527	YES	c1_135_15B3
c1_135_16A2	c1	ZINAL	135	16	A	Switzerland	Eschikon field station	20.05.2016	2016	Input (Bayer, 06.04.2016)	NA	NA	1095	NA	c1_135_16A2
c1_135_16B1	c1	ZINAL	135	16	B	Switzerland	Eschikon field station	20.05.2016	2016	Input (Bayer, 06.04.2016)	NA	NA	474	NA	c1_135_16B1
c1_135_16B2	c1	ZINAL	135	16	B	Switzerland	Eschikon field station	20.05.2016	2016	Input (Bayer, 06.04.2016)	NA	NA	628	NA	c1_135_16B2
c1_135_1A3	c1	ZINAL	135	1	A	Switzerland	Eschikon field station	20.05.2016	2016	Input (Bayer, 06.04.2016)	NA	NA	341	YES	c1_135_1A3
c1_135_1B3	c1	ZINAL	135	1	B	Switzerland	Eschikon field station	20.05.2016	2016	Input (Bayer, 06.04.2016)	NA	NA	1350	YES	c1_135_1B3
c1_135_2A1	c1	ZINAL	135	2	A	Switzerland	Eschikon field station	20.05.2016	2016	Input (Bayer, 06.04.2016)	NA	NA	1094	NA	c1_135_2A1
c1_135_2A2	c1	ZINAL	135	2	A	Switzerland	Eschikon field station	20.05.2016	2016	Input (Bayer, 06.04.2016)	NA	NA	1028	NA	c1_135_2A2
c1_135_2A3	c1	ZINAL	135	2	A	Switzerland	Eschikon field station	20.05.2016	2016	Input (Bayer, 06.04.2016)	NA	NA	1030	YES	c1_135_2A3
c1_135_2B1	c1	ZINAL	135	2	B	Switzerland	Eschikon field station	20.05.2016	2016	Input (Bayer, 06.04.2016)	NA	NA	513	NA	c1_135_2B1
c1_135_2B2	c1	ZINAL	135	2	B	Switzerland	Eschikon field station	20.05.2016	2016	Input (Bayer, 06.04.2016)	NA	NA	474	NA	c1_135_2B2
c1_135_2B3	c1	ZINAL	135	2	B	Switzerland	Eschikon field station	20.05.2016	2016	Input (Bayer, 06.04.2016)	NA	NA	482	NA	c1_135_2B3
c1_135_3A1	c1	ZINAL	135	3	A	Switzerland	Eschikon field station	20.05.2016	2016	Input (Bayer, 06.04.2016)	NA	NA	524	YES	c1_135_3A1
c1_135_3A2	c1	ZINAL	135	3	A	Switzerland	Eschikon field station	20.05.2016	2016	Input (Bayer, 06.04.2016)	ST16CH_1H12	SRR10728832	474	NA	c1_135_3A2
c1_135_3B2	c1	ZINAL	135	3	B	Switzerland	Eschikon field station	20.05.2016	2016	Input (Bayer, 06.04.2016)	NA	NA	1035	NA	c1_135_3B2
c1_135_3B3	c1	ZINAL	135	3	B	Switzerland	Eschikon field station	20.05.2016	2016	Input (Bayer, 06.04.2016)	NA	NA	1163	NA	c1_135_3B3
c1_135_7A1	c1	ZINAL	135	7	A	Switzerland	Eschikon field station	20.05.2016	2016	Input (Bayer, 06.04.2016)	NA	NA	478	NA	c1_135_7A1
c1_135_7A2	c1	ZINAL	135	7	A	Switzerland	Eschikon field station	20.05.2016	2016	Input (Bayer, 06.04.2016)	NA	NA	474	NA	c1_135_7A2
c1_135_7A3	c1	ZINAL	135	7	A	Switzerland	Eschikon field station	20.05.2016	2016	Input (Bayer, 06.04.2016)	NA	NA	478	NA	c1_135_7A3
c1_135_7B1	c1	ZINAL	135	7	B	Switzerland	Eschikon field station	20.05.2016	2016	Input (Bayer, 06.04.2016)	NA	NA	202	YES	c1_135_7B1
c1_135_7B2	c1	ZINAL	135	7	B	Switzerland	Eschikon field station	20.05.2016	2016	Input (Bayer, 06.04.2016)	NA	NA	177	NA	c1_135_7B2
c1_135_7B3	c1	ZINAL	135	7	B	Switzerland	Eschikon field station	20.05.2016	2016	Input (Bayer, 06.04.2016)	NA	NA	177	NA	c1_135_7B3
c1_135_8A1	c1	ZINAL	135	8	A	Switzerland	Eschikon field station	20.05.2016	2016	Input (Bayer, 06.04.2016)	NA	NA	836	NA	c1_135_8A1
c1_135_8A2	c1	ZINAL	135	8	A	Switzerland	Eschikon field station	20.05.2016	2016	Input (Bayer, 06.04.2016)	NA	NA	1306	NA	c1_135_8A2
c1_135_8A3	c1	ZINAL	135	8	A	Switzerland	Eschikon field station	20.05.2016	2016	Input (Bayer, 06.04.2016)	NA	NA	1297	YES	c1_135_8A3
c1_135_8B1	c1	ZINAL	135	8	B	Switzerland	Eschikon field station	20.05.2016	2016	Input (Bayer, 06.04.2016)	NA	NA	857	YES	c1_135_8B1
c1_135_8B2	c1	ZINAL	135	8	B	Switzerland	Eschikon field station	20.05.2016	2016	Input (Bayer, 06.04.2016)	NA	NA	916	YES	c1_135_8B2
c1_135_9A1	c1	ZINAL	135	9	A	Switzerland	Eschikon field station	20.05.2016	2016	Input (Bayer, 06.04.2016)	NA	NA	1449	YES	c1_135_9A1
c1_135_9A2	c1	ZINAL	135	9	A	Switzerland	Eschikon field station	20.05.2016	2016	Input (Bayer, 06.04.2016)	NA	NA	1525	NA	c1_135_9A2
c1_135_9A3	c1	ZINAL	135	9	A	Switzerland	Eschikon field station	20.05.2016	2016	Input (Bayer, 06.04.2016)	NA	NA	1510	YES	c1_135_9A3
c1_135_9B1	c1	ZINAL	135	9	B	Switzerland	Eschikon field station	20.05.2016	2016	Input (Bayer, 06.04.2016)	NA	NA	1190	NA	c1_135_9B1
c1_135_9B2	c1	ZINAL	135	9	B	Switzerland	Eschikon field station	20.05.2016	2016	Input (Bayer, 06.04.2016)	NA	NA	959	YES	c1_135_9B2
c1_135_9B3	c1	ZINAL	135	9	B	Switzerland	Eschikon field station	20.05.2016	2016	Input (Bayer, 06.04.2016)	NA	NA	1190	NA	c1_135_9B3
c1_137_10A1	c1	TITLIS	137	10	A	Switzerland	Eschikon field station	20.05.2016	2016	Input (Bayer, 06.04.2016)	NA	NA	966	NA	c1_137_10A1
c1_137_10A2	c1	TITLIS	137	10	A	Switzerland	Eschikon field station	20.05.2016	2016	Input (Bayer, 06.04.2016)	NA	NA	625	NA	c1_137_10A2
c1_137_10A3	c1	TITLIS	137	10	A	Switzerland	Eschikon field station	20.05.2016	2016	Input (Bayer, 06.04.2016)	NA	NA	579	NA	c1_137_10A3
c1_137_14A2	c1	TITLIS	137	14	A	Switzerland	Eschikon field station	20.05.2016	2016	Input (Bayer, 06.04.2016)	NA	NA	593	NA	c1_137_14A2
c1_137_14A3	c1	TITLIS	137	14	A	Switzerland	Eschikon field station	20.05.2016	2016	Input (Bayer, 06.04.2016)	NA	NA	651	NA	c1_137_14A3
c1_137_14B1	c1	TITLIS	137	14	B	Switzerland	Eschikon field station	20.05.2016	2016	Input (Bayer, 06.04.2016)	NA	NA	1397	YES	c1_137_14B1
c1_137_14B3	c1	TITLIS	137	14	B	Switzerland	Eschikon field station	20.05.2016	2016	Input (Bayer, 06.04.2016)	NA	NA	1416	NA	c1_137_14B3
c1_137_15A1	c1	TITLIS	137	15	A	Switzerland	Eschikon field station	20.05.2016	2016	Input (Bayer, 06.04.2016)	NA	NA	1384	YES	c1_137_15A1
c1_137_15A2	c1	TITLIS	137	15	A	Switzerland	Eschikon field station	20.05.2016	2016	Input (Bayer, 06.04.2016)	NA	NA	1257	YES	c1_137_15A2
c1_137_15A3	c1	TITLIS	137	15	A	Switzerland	Eschikon field station	20.05.2016	2016	Input (Bayer, 06.04.2016)	NA	NA	1532	YES	c1_137_15A3
c1_137_15B2	c1	TITLIS	137	15	B	Switzerland	Eschikon field station	20.05.2016	2016	Input (Bayer, 06.04.2016)	NA	NA	258	YES	c1_137_15B2
c1_137_16A1	c1	TITLIS	137	16	A	Switzerland	Eschikon field station	20.05.2016	2016	Input (Bayer, 06.04.2016)	NA	NA	456	YES	c1_137_16A1
c1_137_16A2	c1	TITLIS	137	16	A	Switzerland	Eschikon field station	20.05.2016	2016	Input (Bayer, 06.04.2016)	NA	NA	607	NA	c1_137_16A2
c1_137_16A3	c1	TITLIS	137	16	A	Switzerland	Eschikon field station	20.05.2016	2016	Input (Bayer, 06.04.2016)	NA	NA	611	NA	c1_137_16A3
c1_137_16B1	c1	TITLIS	137	16	B	Switzerland	Eschikon field station	20.05.2016	2016	Input (Bayer, 06.04.2016)	NA	NA	457	YES	c1_137_16B1
c1_137_16B2	c1	TITLIS	137	16	B	Switzerland	Eschikon field station	20.05.2016	2016	Input (Bayer, 06.04.2016)	NA	NA	611	NA	c1_137_16B2
c1_137_16B3	c1	TITLIS	137	16	B	Switzerland	Eschikon field station	20.05.2016	2016	Input (Bayer, 06.04.2016)	NA	NA	611	NA	c1_137_16B3
c1_137_1A1	c1	TITLIS	137	1	A	Switzerland	Eschikon field station	20.05.2016	2016	Input (Bayer, 06.04.2016)	NA	NA	78	YES	c1_137_1A1
c1_137_1A2	c1	TITLIS	137	1	A	Switzerland	Eschikon field station	20.05.2016	2016	Input (Bayer, 06.04.2016)	NA	NA	81	YES	c1_137_1A2
c1_137_1A3	c1	TITLIS	137	1	A	Switzerland	Eschikon field station	20.05.2016	2016	Input (Bayer, 06.04.2016)	ST16CH_1I3	SRR10728828	168	YES	c1_137_1A3
c1_137_1B2	c1	TITLIS	137	1	B	Switzerland	Eschikon field station	20.05.2016	2016	Input (Bayer, 06.04.2016)	NA	NA	1363	YES	c1_137_1B2
c1_137_2B1	c1	TITLIS	137	2	B	Switzerland	Eschikon field station	20.05.2016	2016	Input (Bayer, 06.04.2016)	NA	NA	680	YES	c1_137_2B1
c1_137_2B2	c1	TITLIS	137	2	B	Switzerland	Eschikon field station	20.05.2016	2016	Input (Bayer, 06.04.2016)	NA	NA	357	YES	c1_137_2B2
c1_137_6A2	c1	TITLIS	137	6	A	Switzerland	Eschikon field station	20.05.2016	2016	Input (Bayer, 06.04.2016)	NA	NA	1520	YES	c1_137_6A2
c1_137_6A3	c1	TITLIS	137	6	A	Switzerland	Eschikon field station	20.05.2016	2016	Input (Bayer, 06.04.2016)	NA	NA	1381	YES	c1_137_6A3
c1_137_7B1	c1	TITLIS	137	7	B	Switzerland	Eschikon field station	20.05.2016	2016	Input (Bayer, 06.04.2016)	NA	NA	285	NA	c1_137_7B1
c1_137_7B2	c1	TITLIS	137	7	B	Switzerland	Eschikon field station	20.05.2016	2016	Input (Bayer, 06.04.2016)	ST16CH_1I10	SRR10728829	265	NA	c1_137_7B2
c1_137_8A1	c1	TITLIS	137	8	A	Switzerland	Eschikon field station	20.05.2016	2016	Input (Bayer, 06.04.2016)	NA	NA	627	YES	c1_137_8A1
c1_137_8A3	c1	TITLIS	137	8	A	Switzerland	Eschikon field station	20.05.2016	2016	Input (Bayer, 06.04.2016)	NA	NA	581	NA	c1_137_8A3
c1_137_8B1	c1	TITLIS	137	8	B	Switzerland	Eschikon field station	20.05.2016	2016	Input (Bayer, 06.04.2016)	NA	NA	914	NA	c1_137_8B1
c1_137_8B2	c1	TITLIS	137	8	B	Switzerland	Eschikon field station	20.05.2016	2016	Input (Bayer, 06.04.2016)	NA	NA	853	YES	c1_137_8B2
c1_137_9A2	c1	TITLIS	137	9	A	Switzerland	Eschikon field station	20.05.2016	2016	Input (Bayer, 06.04.2016)	NA	NA	584	NA	c1_137_9A2
c1_137_9A3	c1	TITLIS	137	9	A	Switzerland	Eschikon field station	20.05.2016	2016	Input (Bayer, 06.04.2016)	NA	NA	830	YES	c1_137_9A3
c1_137_9B2	c1	TITLIS	137	9	B	Switzerland	Eschikon field station	20.05.2016	2016	Input (Bayer, 06.04.2016)	NA	NA	169	YES	c1_137_9B2
c1_137_9B3	c1	TITLIS	137	9	B	Switzerland	Eschikon field station	20.05.2016	2016	Input (Bayer, 06.04.2016)	NA	NA	150	YES	c1_137_9B3
c1_14_10A1	c1	LORENZO	14	10	A	Switzerland	Eschikon field station	20.05.2016	2016	Input (Bayer, 06.04.2016)	NA	NA	421	NA	c1_14_10A1
c1_14_10A2	c1	LORENZO	14	10	A	Switzerland	Eschikon field station	20.05.2016	2016	Input (Bayer, 06.04.2016)	NA	NA	563	NA	c1_14_10A2
c1_14_10A3	c1	LORENZO	14	10	A	Switzerland	Eschikon field station	20.05.2016	2016	Input (Bayer, 06.04.2016)	NA	NA	45	YES	c1_14_10A3
c1_14_10B1	c1	LORENZO	14	10	B	Switzerland	Eschikon field station	20.05.2016	2016	Input (Bayer, 06.04.2016)	NA	NA	39	NA	c1_14_10B1
c1_14_10B2	c1	LORENZO	14	10	B	Switzerland	Eschikon field station	20.05.2016	2016	Input (Bayer, 06.04.2016)	NA	NA	46	NA	c1_14_10B2
c1_14_10B3	c1	LORENZO	14	10	B	Switzerland	Eschikon field station	20.05.2016	2016	Input (Bayer, 06.04.2016)	NA	NA	46	NA	c1_14_10B3
c1_14_11A1	c1	LORENZO	14	11	A	Switzerland	Eschikon field station	20.05.2016	2016	Input (Bayer, 06.04.2016)	NA	NA	154	NA	c1_14_11A1
c1_14_11A3	c1	LORENZO	14	11	A	Switzerland	Eschikon field station	20.05.2016	2016	Input (Bayer, 06.04.2016)	NA	NA	157	YES	c1_14_11A3
c1_14_11B1	c1	LORENZO	14	11	B	Switzerland	Eschikon field station	20.05.2016	2016	Input (Bayer, 06.04.2016)	NA	NA	153	NA	c1_14_11B1
c1_14_11B2	c1	LORENZO	14	11	B	Switzerland	Eschikon field station	20.05.2016	2016	Input (Bayer, 06.04.2016)	NA	NA	1047	NA	c1_14_11B2
c1_14_11B3	c1	LORENZO	14	11	B	Switzerland	Eschikon field station	20.05.2016	2016	Input (Bayer, 06.04.2016)	NA	NA	1074	NA	c1_14_11B3
c1_14_12A1	c1	LORENZO	14	12	A	Switzerland	Eschikon field station	20.05.2016	2016	Input (Bayer, 06.04.2016)	NA	NA	665	YES	c1_14_12A1
c1_14_12A2	c1	LORENZO	14	12	A	Switzerland	Eschikon field station	20.05.2016	2016	Input (Bayer, 06.04.2016)	NA	NA	490	NA	c1_14_12A2
c1_14_12A3	c1	LORENZO	14	12	A	Switzerland	Eschikon field station	20.05.2016	2016	Input (Bayer, 06.04.2016)	NA	NA	572	NA	c1_14_12A3
c1_14_12B1	c1	LORENZO	14	12	B	Switzerland	Eschikon field station	20.05.2016	2016	Input (Bayer, 06.04.2016)	NA	NA	505	NA	c1_14_12B1
c1_14_12B2	c1	LORENZO	14	12	B	Switzerland	Eschikon field station	20.05.2016	2016	Input (Bayer, 06.04.2016)	NA	NA	511	NA	c1_14_12B2
c1_14_12B3	c1	LORENZO	14	12	B	Switzerland	Eschikon field station	20.05.2016	2016	Input (Bayer, 06.04.2016)	NA	NA	506	NA	c1_14_12B3
c1_14_13A1	c1	LORENZO	14	13	A	Switzerland	Eschikon field station	20.05.2016	2016	Input (Bayer, 06.04.2016)	NA	NA	823	NA	c1_14_13A1
c1_14_13A2	c1	LORENZO	14	13	A	Switzerland	Eschikon field station	20.05.2016	2016	Input (Bayer, 06.04.2016)	NA	NA	548	NA	c1_14_13A2
c1_14_13A3	c1	LORENZO	14	13	A	Switzerland	Eschikon field station	20.05.2016	2016	Input (Bayer, 06.04.2016)	NA	NA	1294	NA	c1_14_13A3
c1_14_13B1	c1	LORENZO	14	13	B	Switzerland	Eschikon field station	20.05.2016	2016	Input (Bayer, 06.04.2016)	NA	NA	1113	YES	c1_14_13B1
c1_14_13B2	c1	LORENZO	14	13	B	Switzerland	Eschikon field station	20.05.2016	2016	Input (Bayer, 06.04.2016)	NA	NA	1304	NA	c1_14_13B2
c1_14_13B3	c1	LORENZO	14	13	B	Switzerland	Eschikon field station	20.05.2016	2016	Input (Bayer, 06.04.2016)	NA	NA	447	NA	c1_14_13B3
c1_14_14A1	c1	LORENZO	14	14	A	Switzerland	Eschikon field station	20.05.2016	2016	Input (Bayer, 06.04.2016)	NA	NA	1286	YES	c1_14_14A1
c1_14_14A2	c1	LORENZO	14	14	A	Switzerland	Eschikon field station	20.05.2016	2016	Input (Bayer, 06.04.2016)	NA	NA	352	NA	c1_14_14A2
c1_14_14A3	c1	LORENZO	14	14	A	Switzerland	Eschikon field station	20.05.2016	2016	Input (Bayer, 06.04.2016)	NA	NA	350	NA	c1_14_14A3
c1_14_15A1	c1	LORENZO	14	15	A	Switzerland	Eschikon field station	20.05.2016	2016	Input (Bayer, 06.04.2016)	NA	NA	508	NA	c1_14_15A1
c1_14_15A2	c1	LORENZO	14	15	A	Switzerland	Eschikon field station	20.05.2016	2016	Input (Bayer, 06.04.2016)	NA	NA	411	YES	c1_14_15A2
c1_14_15A3	c1	LORENZO	14	15	A	Switzerland	Eschikon field station	20.05.2016	2016	Input (Bayer, 06.04.2016)	NA	NA	502	NA	c1_14_15A3
c1_14_15B2	c1	LORENZO	14	15	B	Switzerland	Eschikon field station	20.05.2016	2016	Input (Bayer, 06.04.2016)	ST16CH_1B73	SRR10728854	523	YES	c1_14_15B2
c1_14_15B3	c1	LORENZO	14	15	B	Switzerland	Eschikon field station	20.05.2016	2016	Input (Bayer, 06.04.2016)	NA	NA	503	NA	c1_14_15B3
c1_14_16A1	c1	LORENZO	14	16	A	Switzerland	Eschikon field station	20.05.2016	2016	Input (Bayer, 06.04.2016)	NA	NA	371	YES	c1_14_16A1
c1_14_16A2	c1	LORENZO	14	16	A	Switzerland	Eschikon field station	20.05.2016	2016	Input (Bayer, 06.04.2016)	NA	NA	645	NA	c1_14_16A2
c1_14_16A3	c1	LORENZO	14	16	A	Switzerland	Eschikon field station	20.05.2016	2016	Input (Bayer, 06.04.2016)	NA	NA	695	NA	c1_14_16A3
c1_14_16B1	c1	LORENZO	14	16	B	Switzerland	Eschikon field station	20.05.2016	2016	Input (Bayer, 06.04.2016)	NA	NA	364	YES	c1_14_16B1
c1_14_16B2	c1	LORENZO	14	16	B	Switzerland	Eschikon field station	20.05.2016	2016	Input (Bayer, 06.04.2016)	NA	NA	396	NA	c1_14_16B2
c1_14_16B3	c1	LORENZO	14	16	B	Switzerland	Eschikon field station	20.05.2016	2016	Input (Bayer, 06.04.2016)	NA	NA	395	NA	c1_14_16B3
c1_14_1A2	c1	LORENZO	14	1	A	Switzerland	Eschikon field station	20.05.2016	2016	Input (Bayer, 06.04.2016)	NA	NA	1221	YES	c1_14_1A2
c1_14_1A3	c1	LORENZO	14	1	A	Switzerland	Eschikon field station	20.05.2016	2016	Input (Bayer, 06.04.2016)	NA	NA	1152	NA	c1_14_1A3
c1_14_1B1	c1	LORENZO	14	1	B	Switzerland	Eschikon field station	20.05.2016	2016	Input (Bayer, 06.04.2016)	NA	NA	240	YES	c1_14_1B1
c1_14_1B2	c1	LORENZO	14	1	B	Switzerland	Eschikon field station	20.05.2016	2016	Input (Bayer, 06.04.2016)	NA	NA	199	YES	c1_14_1B2
c1_14_1B3	c1	LORENZO	14	1	B	Switzerland	Eschikon field station	20.05.2016	2016	Input (Bayer, 06.04.2016)	NA	NA	279	NA	c1_14_1B3
c1_14_2A1	c1	LORENZO	14	2	A	Switzerland	Eschikon field station	20.05.2016	2016	Input (Bayer, 06.04.2016)	NA	NA	525	NA	c1_14_2A1
c1_14_2A2	c1	LORENZO	14	2	A	Switzerland	Eschikon field station	20.05.2016	2016	Input (Bayer, 06.04.2016)	NA	NA	1487	NA	c1_14_2A2
c1_14_2A3	c1	LORENZO	14	2	A	Switzerland	Eschikon field station	20.05.2016	2016	Input (Bayer, 06.04.2016)	ST16CH_1B8	SRR10728853	1383	YES	c1_14_2A3
c1_14_2B1	c1	LORENZO	14	2	B	Switzerland	Eschikon field station	20.05.2016	2016	Input (Bayer, 06.04.2016)	NA	NA	532	NA	c1_14_2B1
c1_14_2B2	c1	LORENZO	14	2	B	Switzerland	Eschikon field station	20.05.2016	2016	Input (Bayer, 06.04.2016)	NA	NA	532	NA	c1_14_2B2
c1_14_2B3	c1	LORENZO	14	2	B	Switzerland	Eschikon field station	20.05.2016	2016	Input (Bayer, 06.04.2016)	NA	NA	502	NA	c1_14_2B3
c1_14_3A2	c1	LORENZO	14	3	A	Switzerland	Eschikon field station	20.05.2016	2016	Input (Bayer, 06.04.2016)	NA	NA	478	NA	c1_14_3A2
c1_14_3A3	c1	LORENZO	14	3	A	Switzerland	Eschikon field station	20.05.2016	2016	Input (Bayer, 06.04.2016)	NA	NA	480	NA	c1_14_3A3
c1_14_3B1	c1	LORENZO	14	3	B	Switzerland	Eschikon field station	20.05.2016	2016	Input (Bayer, 06.04.2016)	NA	NA	1313	NA	c1_14_3B1
c1_14_3B2	c1	LORENZO	14	3	B	Switzerland	Eschikon field station	20.05.2016	2016	Input (Bayer, 06.04.2016)	NA	NA	40	YES	c1_14_3B2
c1_14_3B3	c1	LORENZO	14	3	B	Switzerland	Eschikon field station	20.05.2016	2016	Input (Bayer, 06.04.2016)	NA	NA	47	NA	c1_14_3B3
c1_14_4A1	c1	LORENZO	14	4	A	Switzerland	Eschikon field station	20.05.2016	2016	Input (Bayer, 06.04.2016)	NA	NA	1112	YES	c1_14_4A1
c1_14_4A2	c1	LORENZO	14	4	A	Switzerland	Eschikon field station	20.05.2016	2016	Input (Bayer, 06.04.2016)	NA	NA	1290	NA	c1_14_4A2
c1_14_4A3	c1	LORENZO	14	4	A	Switzerland	Eschikon field station	20.05.2016	2016	Input (Bayer, 06.04.2016)	NA	NA	1290	NA	c1_14_4A3
c1_14_4B2	c1	LORENZO	14	4	B	Switzerland	Eschikon field station	20.05.2016	2016	Input (Bayer, 06.04.2016)	NA	NA	534	YES	c1_14_4B2
c1_14_4B3	c1	LORENZO	14	4	B	Switzerland	Eschikon field station	20.05.2016	2016	Input (Bayer, 06.04.2016)	NA	NA	540	NA	c1_14_4B3
c1_14_5A1	c1	LORENZO	14	5	A	Switzerland	Eschikon field station	20.05.2016	2016	Input (Bayer, 06.04.2016)	NA	NA	1234	YES	c1_14_5A1
c1_14_5A2	c1	LORENZO	14	5	A	Switzerland	Eschikon field station	20.05.2016	2016	Input (Bayer, 06.04.2016)	NA	NA	540	NA	c1_14_5A2
c1_14_5A3	c1	LORENZO	14	5	A	Switzerland	Eschikon field station	20.05.2016	2016	Input (Bayer, 06.04.2016)	NA	NA	531	NA	c1_14_5A3
c1_14_5B1	c1	LORENZO	14	5	B	Switzerland	Eschikon field station	20.05.2016	2016	Input (Bayer, 06.04.2016)	NA	NA	390	YES	c1_14_5B1
c1_14_5B2	c1	LORENZO	14	5	B	Switzerland	Eschikon field station	20.05.2016	2016	Input (Bayer, 06.04.2016)	NA	NA	437	NA	c1_14_5B2
c1_14_5B3	c1	LORENZO	14	5	B	Switzerland	Eschikon field station	20.05.2016	2016	Input (Bayer, 06.04.2016)	NA	NA	432	NA	c1_14_5B3
c1_14_6A1	c1	LORENZO	14	6	A	Switzerland	Eschikon field station	20.05.2016	2016	Input (Bayer, 06.04.2016)	NA	NA	156	NA	c1_14_6A1
c1_14_6A2	c1	LORENZO	14	6	A	Switzerland	Eschikon field station	20.05.2016	2016	Input (Bayer, 06.04.2016)	NA	NA	201	NA	c1_14_6A2
c1_14_6A3	c1	LORENZO	14	6	A	Switzerland	Eschikon field station	20.05.2016	2016	Input (Bayer, 06.04.2016)	NA	NA	1146	NA	c1_14_6A3
c1_14_6B2	c1	LORENZO	14	6	B	Switzerland	Eschikon field station	20.05.2016	2016	Input (Bayer, 06.04.2016)	ST16CH_1B31	SRR10728855	646	YES	c1_14_6B2
c1_14_7A1	c1	LORENZO	14	7	A	Switzerland	Eschikon field station	20.05.2016	2016	Input (Bayer, 06.04.2016)	NA	NA	1148	NA	c1_14_7A1
c1_14_7A2	c1	LORENZO	14	7	A	Switzerland	Eschikon field station	20.05.2016	2016	Input (Bayer, 06.04.2016)	NA	NA	1086	YES	c1_14_7A2
c1_14_7B1	c1	LORENZO	14	7	B	Switzerland	Eschikon field station	20.05.2016	2016	Input (Bayer, 06.04.2016)	NA	NA	1125	NA	c1_14_7B1
c1_14_7B3	c1	LORENZO	14	7	B	Switzerland	Eschikon field station	20.05.2016	2016	Input (Bayer, 06.04.2016)	NA	NA	1108	YES	c1_14_7B3
c1_14_8A1	c1	LORENZO	14	8	A	Switzerland	Eschikon field station	20.05.2016	2016	Input (Bayer, 06.04.2016)	NA	NA	273	YES	c1_14_8A1
c1_14_8A2	c1	LORENZO	14	8	A	Switzerland	Eschikon field station	20.05.2016	2016	Input (Bayer, 06.04.2016)	NA	NA	1087	NA	c1_14_8A2
c1_14_8A3	c1	LORENZO	14	8	A	Switzerland	Eschikon field station	20.05.2016	2016	Input (Bayer, 06.04.2016)	NA	NA	1064	NA	c1_14_8A3
c1_14_8B1	c1	LORENZO	14	8	B	Switzerland	Eschikon field station	20.05.2016	2016	Input (Bayer, 06.04.2016)	NA	NA	912	YES	c1_14_8B1
c1_14_8B2	c1	LORENZO	14	8	B	Switzerland	Eschikon field station	20.05.2016	2016	Input (Bayer, 06.04.2016)	NA	NA	427	NA	c1_14_8B2
c1_14_8B3	c1	LORENZO	14	8	B	Switzerland	Eschikon field station	20.05.2016	2016	Input (Bayer, 06.04.2016)	NA	NA	430	NA	c1_14_8B3
c1_14_9A3	c1	LORENZO	14	9	A	Switzerland	Eschikon field station	20.05.2016	2016	Input (Bayer, 06.04.2016)	NA	NA	1086	YES	c1_14_9A3
c1_14_9B2	c1	LORENZO	14	9	B	Switzerland	Eschikon field station	20.05.2016	2016	Input (Bayer, 06.04.2016)	NA	NA	1333	NA	c1_14_9B2
c1_158_10B1	c1	CH CAMEDO	158	10	B	Switzerland	Eschikon field station	20.05.2016	2016	Input (Bayer, 06.04.2016)	NA	NA	827	YES	c1_158_10B1
c1_158_14A1	c1	CH CAMEDO	158	14	A	Switzerland	Eschikon field station	20.05.2016	2016	Input (Bayer, 06.04.2016)	NA	NA	609	NA	c1_158_14A1
c1_158_14A2	c1	CH CAMEDO	158	14	A	Switzerland	Eschikon field station	20.05.2016	2016	Input (Bayer, 06.04.2016)	NA	NA	513	NA	c1_158_14A2
c1_158_14A3	c1	CH CAMEDO	158	14	A	Switzerland	Eschikon field station	20.05.2016	2016	Input (Bayer, 06.04.2016)	NA	NA	588	NA	c1_158_14A3
c1_158_14B2	c1	CH CAMEDO	158	14	B	Switzerland	Eschikon field station	20.05.2016	2016	Input (Bayer, 06.04.2016)	ST16CH_1K42	SRR10728825	588	YES	c1_158_14B2
c1_158_16A1	c1	CH CAMEDO	158	16	A	Switzerland	Eschikon field station	20.05.2016	2016	Input (Bayer, 06.04.2016)	NA	NA	514	YES	c1_158_16A1
c1_158_16A2	c1	CH CAMEDO	158	16	A	Switzerland	Eschikon field station	20.05.2016	2016	Input (Bayer, 06.04.2016)	NA	NA	558	YES	c1_158_16A2
c1_158_16B1	c1	CH CAMEDO	158	16	B	Switzerland	Eschikon field station	20.05.2016	2016	Input (Bayer, 06.04.2016)	NA	NA	539	NA	c1_158_16B1
c1_158_16B2	c1	CH CAMEDO	158	16	B	Switzerland	Eschikon field station	20.05.2016	2016	Input (Bayer, 06.04.2016)	NA	NA	1170	YES	c1_158_16B2
c1_158_16B3	c1	CH CAMEDO	158	16	B	Switzerland	Eschikon field station	20.05.2016	2016	Input (Bayer, 06.04.2016)	NA	NA	513	NA	c1_158_16B3
c1_158_5B1	c1	CH CAMEDO	158	5	B	Switzerland	Eschikon field station	20.05.2016	2016	Input (Bayer, 06.04.2016)	NA	NA	868	YES	c1_158_5B1
c1_158_8A1	c1	CH CAMEDO	158	8	A	Switzerland	Eschikon field station	20.05.2016	2016	Input (Bayer, 06.04.2016)	NA	NA	1260	YES	c1_158_8A1
c1_158_8A2	c1	CH CAMEDO	158	8	A	Switzerland	Eschikon field station	20.05.2016	2016	Input (Bayer, 06.04.2016)	NA	NA	1169	NA	c1_158_8A2
c1_158_8A3	c1	CH CAMEDO	158	8	A	Switzerland	Eschikon field station	20.05.2016	2016	Input (Bayer, 06.04.2016)	ST16CH_1K29	SRR10728826	1169	NA	c1_158_8A3
c1_158_8B1	c1	CH CAMEDO	158	8	B	Switzerland	Eschikon field station	20.05.2016	2016	Input (Bayer, 06.04.2016)	NA	NA	1545	YES	c1_158_8B1
c1_158_8B2	c1	CH CAMEDO	158	8	B	Switzerland	Eschikon field station	20.05.2016	2016	Input (Bayer, 06.04.2016)	NA	NA	1572	NA	c1_158_8B2
c1_158_9A1	c1	CH CAMEDO	158	9	A	Switzerland	Eschikon field station	20.05.2016	2016	Input (Bayer, 06.04.2016)	NA	NA	565	NA	c1_158_9A1
c1_158_9A2	c1	CH CAMEDO	158	9	A	Switzerland	Eschikon field station	20.05.2016	2016	Input (Bayer, 06.04.2016)	NA	NA	414	YES	c1_158_9A2
c1_158_9A3	c1	CH CAMEDO	158	9	A	Switzerland	Eschikon field station	20.05.2016	2016	Input (Bayer, 06.04.2016)	NA	NA	553	YES	c1_158_9A3
c1_158_9B1	c1	CH CAMEDO	158	9	B	Switzerland	Eschikon field station	20.05.2016	2016	Input (Bayer, 06.04.2016)	NA	NA	1217	NA	c1_158_9B1
c1_158_9B3	c1	CH CAMEDO	158	9	B	Switzerland	Eschikon field station	20.05.2016	2016	Input (Bayer, 06.04.2016)	NA	NA	1315	NA	c1_158_9B3
c1_18_1H1	c1	MARCHEVAL	18	1	H	Switzerland	Eschikon field station	20.05.2016	2016	Input (Bayer, 06.04.2016)	NA	NA	537	NA	c1_18_1H1
c1_18_9H1	c1	MARCHEVAL	18	9	H	Switzerland	Eschikon field station	20.05.2016	2016	Input (Bayer, 06.04.2016)	NA	NA	638	NA	c1_18_9H1
c1_186_10H1	c1	CASSIOPEIA	186	10	H	Switzerland	Eschikon field station	20.05.2016	2016	Input (Bayer, 06.04.2016)	NA	NA	766	NA	c1_186_10H1
c1_186_10H2	c1	CASSIOPEIA	186	10	H	Switzerland	Eschikon field station	20.05.2016	2016	Input (Bayer, 06.04.2016)	NA	NA	774	NA	c1_186_10H2
c1_186_10J1	c1	CASSIOPEIA	186	10	J	Switzerland	Eschikon field station	20.05.2016	2016	Input (Bayer, 06.04.2016)	NA	NA	645	NA	c1_186_10J1
c1_186_10J2	c1	CASSIOPEIA	186	10	J	Switzerland	Eschikon field station	20.05.2016	2016	Input (Bayer, 06.04.2016)	NA	NA	425	NA	c1_186_10J2
c1_186_10K1	c1	CASSIOPEIA	186	10	K	Switzerland	Eschikon field station	20.05.2016	2016	Input (Bayer, 06.04.2016)	NA	NA	11	NA	c1_186_10K1
c1_186_10K2	c1	CASSIOPEIA	186	10	K	Switzerland	Eschikon field station	20.05.2016	2016	Input (Bayer, 06.04.2016)	NA	NA	952	NA	c1_186_10K2
c1_186_1H1	c1	CASSIOPEIA	186	1	H	Switzerland	Eschikon field station	20.05.2016	2016	Input (Bayer, 06.04.2016)	NA	NA	1276	NA	c1_186_1H1
c1_186_1H2	c1	CASSIOPEIA	186	1	H	Switzerland	Eschikon field station	20.05.2016	2016	Input (Bayer, 06.04.2016)	NA	NA	1340	NA	c1_186_1H2
c1_186_1J1	c1	CASSIOPEIA	186	1	J	Switzerland	Eschikon field station	20.05.2016	2016	Input (Bayer, 06.04.2016)	NA	NA	1179	NA	c1_186_1J1
c1_186_3H1	c1	CASSIOPEIA	186	3	H	Switzerland	Eschikon field station	20.05.2016	2016	Input (Bayer, 06.04.2016)	NA	NA	442	NA	c1_186_3H1
c1_186_4H1	c1	CASSIOPEIA	186	4	H	Switzerland	Eschikon field station	20.05.2016	2016	Input (Bayer, 06.04.2016)	NA	NA	799	NA	c1_186_4H1
c1_186_4H2	c1	CASSIOPEIA	186	4	H	Switzerland	Eschikon field station	20.05.2016	2016	Input (Bayer, 06.04.2016)	NA	NA	842	NA	c1_186_4H2
c1_186_7H1	c1	CASSIOPEIA	186	7	H	Switzerland	Eschikon field station	20.05.2016	2016	Input (Bayer, 06.04.2016)	NA	NA	815	NA	c1_186_7H1
c1_186_9J1	c1	CASSIOPEIA	186	9	J	Switzerland	Eschikon field station	20.05.2016	2016	Input (Bayer, 06.04.2016)	NA	NA	1406	NA	c1_186_9J1
c1_186_9J2	c1	CASSIOPEIA	186	9	J	Switzerland	Eschikon field station	20.05.2016	2016	Input (Bayer, 06.04.2016)	NA	NA	1411	NA	c1_186_9J2
c1_2_10A1	c1	RUNAL	2	10	A	Switzerland	Eschikon field station	20.05.2016	2016	Input (Bayer, 06.04.2016)	NA	NA	420	YES	c1_2_10A1
c1_2_10A2	c1	RUNAL	2	10	A	Switzerland	Eschikon field station	20.05.2016	2016	Input (Bayer, 06.04.2016)	NA	NA	616	NA	c1_2_10A2
c1_2_10A3	c1	RUNAL	2	10	A	Switzerland	Eschikon field station	20.05.2016	2016	Input (Bayer, 06.04.2016)	NA	NA	616	NA	c1_2_10A3
c1_2_10B2	c1	RUNAL	2	10	B	Switzerland	Eschikon field station	20.05.2016	2016	Input (Bayer, 06.04.2016)	NA	NA	883	YES	c1_2_10B2
c1_2_10B3	c1	RUNAL	2	10	B	Switzerland	Eschikon field station	20.05.2016	2016	Input (Bayer, 06.04.2016)	NA	NA	1005	NA	c1_2_10B3
c1_2_11A1	c1	RUNAL	2	11	A	Switzerland	Eschikon field station	20.05.2016	2016	Input (Bayer, 06.04.2016)	NA	NA	283	NA	c1_2_11A1
c1_2_11A2	c1	RUNAL	2	11	A	Switzerland	Eschikon field station	20.05.2016	2016	Input (Bayer, 06.04.2016)	NA	NA	283	YES	c1_2_11A2
c1_2_12A1	c1	RUNAL	2	12	A	Switzerland	Eschikon field station	20.05.2016	2016	Input (Bayer, 06.04.2016)	NA	NA	882	YES	c1_2_12A1
c1_2_13A2	c1	RUNAL	2	13	A	Switzerland	Eschikon field station	20.05.2016	2016	Input (Bayer, 06.04.2016)	NA	NA	890	YES	c1_2_13A2
c1_2_13B1	c1	RUNAL	2	13	B	Switzerland	Eschikon field station	20.05.2016	2016	Input (Bayer, 06.04.2016)	NA	NA	705	NA	c1_2_13B1
c1_2_14A2	c1	RUNAL	2	14	A	Switzerland	Eschikon field station	20.05.2016	2016	Input (Bayer, 06.04.2016)	NA	NA	967	YES	c1_2_14A2
c1_2_14A3	c1	RUNAL	2	14	A	Switzerland	Eschikon field station	20.05.2016	2016	Input (Bayer, 06.04.2016)	NA	NA	1083	NA	c1_2_14A3
c1_2_14B1	c1	RUNAL	2	14	B	Switzerland	Eschikon field station	20.05.2016	2016	Input (Bayer, 06.04.2016)	NA	NA	6	NA	c1_2_14B1
c1_2_14B3	c1	RUNAL	2	14	B	Switzerland	Eschikon field station	20.05.2016	2016	Input (Bayer, 06.04.2016)	ST16CH_1A57	SRR10728856	5	YES	c1_2_14B3
c1_2_15A1	c1	RUNAL	2	15	A	Switzerland	Eschikon field station	20.05.2016	2016	Input (Bayer, 06.04.2016)	NA	NA	1301	NA	c1_2_15A1
c1_2_15B1	c1	RUNAL	2	15	B	Switzerland	Eschikon field station	20.05.2016	2016	Input (Bayer, 06.04.2016)	NA	NA	460	NA	c1_2_15B1
c1_2_15B2	c1	RUNAL	2	15	B	Switzerland	Eschikon field station	20.05.2016	2016	Input (Bayer, 06.04.2016)	NA	NA	319	NA	c1_2_15B2
c1_2_15B3	c1	RUNAL	2	15	B	Switzerland	Eschikon field station	20.05.2016	2016	Input (Bayer, 06.04.2016)	NA	NA	610	NA	c1_2_15B3
c1_2_16A1	c1	RUNAL	2	16	A	Switzerland	Eschikon field station	20.05.2016	2016	Input (Bayer, 06.04.2016)	NA	NA	7	YES	c1_2_16A1
c1_2_16A2	c1	RUNAL	2	16	A	Switzerland	Eschikon field station	20.05.2016	2016	Input (Bayer, 06.04.2016)	NA	NA	8	NA	c1_2_16A2
c1_2_16A3	c1	RUNAL	2	16	A	Switzerland	Eschikon field station	20.05.2016	2016	Input (Bayer, 06.04.2016)	NA	NA	8	NA	c1_2_16A3
c1_2_16B1	c1	RUNAL	2	16	B	Switzerland	Eschikon field station	20.05.2016	2016	Input (Bayer, 06.04.2016)	NA	NA	957	YES	c1_2_16B1
c1_2_16B2	c1	RUNAL	2	16	B	Switzerland	Eschikon field station	20.05.2016	2016	Input (Bayer, 06.04.2016)	NA	NA	1193	NA	c1_2_16B2
c1_2_1A1	c1	RUNAL	2	1	A	Switzerland	Eschikon field station	20.05.2016	2016	Input (Bayer, 06.04.2016)	ST16CH_1A1	SRR10728588	990	NA	c1_2_1A1
c1_2_1B2	c1	RUNAL	2	1	B	Switzerland	Eschikon field station	20.05.2016	2016	Input (Bayer, 06.04.2016)	NA	NA	1388	YES	c1_2_1B2
c1_2_2A1	c1	RUNAL	2	2	A	Switzerland	Eschikon field station	20.05.2016	2016	Input (Bayer, 06.04.2016)	NA	NA	978	YES	c1_2_2A1
c1_2_2A2	c1	RUNAL	2	2	A	Switzerland	Eschikon field station	20.05.2016	2016	Input (Bayer, 06.04.2016)	NA	NA	817	YES	c1_2_2A2
c1_2_2A3	c1	RUNAL	2	2	A	Switzerland	Eschikon field station	20.05.2016	2016	Input (Bayer, 06.04.2016)	NA	NA	1045	NA	c1_2_2A3
c1_2_2B2	c1	RUNAL	2	2	B	Switzerland	Eschikon field station	20.05.2016	2016	Input (Bayer, 06.04.2016)	NA	NA	818	YES	c1_2_2B2
c1_2_3A1	c1	RUNAL	2	3	A	Switzerland	Eschikon field station	20.05.2016	2016	Input (Bayer, 06.04.2016)	NA	NA	102	NA	c1_2_3A1
c1_2_3A2	c1	RUNAL	2	3	A	Switzerland	Eschikon field station	20.05.2016	2016	Input (Bayer, 06.04.2016)	NA	NA	64	YES	c1_2_3A2
c1_2_3A3	c1	RUNAL	2	3	A	Switzerland	Eschikon field station	20.05.2016	2016	Input (Bayer, 06.04.2016)	NA	NA	102	NA	c1_2_3A3
c1_2_3B1	c1	RUNAL	2	3	B	Switzerland	Eschikon field station	20.05.2016	2016	Input (Bayer, 06.04.2016)	NA	NA	531	NA	c1_2_3B1
c1_2_3B2	c1	RUNAL	2	3	B	Switzerland	Eschikon field station	20.05.2016	2016	Input (Bayer, 06.04.2016)	ST16CH_1A11	SRR10728587	540	YES	c1_2_3B2
c1_2_3B3	c1	RUNAL	2	3	B	Switzerland	Eschikon field station	20.05.2016	2016	Input (Bayer, 06.04.2016)	NA	NA	362	YES	c1_2_3B3
c1_2_4A1	c1	RUNAL	2	4	A	Switzerland	Eschikon field station	20.05.2016	2016	Input (Bayer, 06.04.2016)	NA	NA	210	YES	c1_2_4A1
c1_2_4A2	c1	RUNAL	2	4	A	Switzerland	Eschikon field station	20.05.2016	2016	Input (Bayer, 06.04.2016)	NA	NA	198	NA	c1_2_4A2
c1_2_5A1	c1	RUNAL	2	5	A	Switzerland	Eschikon field station	20.05.2016	2016	Input (Bayer, 06.04.2016)	NA	NA	538	NA	c1_2_5A1
c1_2_5A2	c1	RUNAL	2	5	A	Switzerland	Eschikon field station	20.05.2016	2016	Input (Bayer, 06.04.2016)	NA	NA	531	NA	c1_2_5A2
c1_2_5A3	c1	RUNAL	2	5	A	Switzerland	Eschikon field station	20.05.2016	2016	Input (Bayer, 06.04.2016)	NA	NA	531	NA	c1_2_5A3
c1_2_5B1	c1	RUNAL	2	5	B	Switzerland	Eschikon field station	20.05.2016	2016	Input (Bayer, 06.04.2016)	NA	NA	65	NA	c1_2_5B1
c1_2_5B2	c1	RUNAL	2	5	B	Switzerland	Eschikon field station	20.05.2016	2016	Input (Bayer, 06.04.2016)	NA	NA	66	YES	c1_2_5B2
c1_2_5B3	c1	RUNAL	2	5	B	Switzerland	Eschikon field station	20.05.2016	2016	Input (Bayer, 06.04.2016)	NA	NA	65	NA	c1_2_5B3
c1_2_6A1	c1	RUNAL	2	6	A	Switzerland	Eschikon field station	20.05.2016	2016	Input (Bayer, 06.04.2016)	NA	NA	318	YES	c1_2_6A1
c1_2_6A2	c1	RUNAL	2	6	A	Switzerland	Eschikon field station	20.05.2016	2016	Input (Bayer, 06.04.2016)	NA	NA	1130	YES	c1_2_6A2
c1_2_6B1	c1	RUNAL	2	6	B	Switzerland	Eschikon field station	20.05.2016	2016	Input (Bayer, 06.04.2016)	NA	NA	690	YES	c1_2_6B1
c1_2_6B2	c1	RUNAL	2	6	B	Switzerland	Eschikon field station	20.05.2016	2016	Input (Bayer, 06.04.2016)	NA	NA	687	NA	c1_2_6B2
c1_2_6B3	c1	RUNAL	2	6	B	Switzerland	Eschikon field station	20.05.2016	2016	Input (Bayer, 06.04.2016)	NA	NA	687	NA	c1_2_6B3
c1_2_8A1	c1	RUNAL	2	8	A	Switzerland	Eschikon field station	20.05.2016	2016	Input (Bayer, 06.04.2016)	NA	NA	632	NA	c1_2_8A1
c1_2_8A2	c1	RUNAL	2	8	A	Switzerland	Eschikon field station	20.05.2016	2016	Input (Bayer, 06.04.2016)	ST16CH_1A27	SRR10728586	446	YES	c1_2_8A2
c1_2_8A3	c1	RUNAL	2	8	A	Switzerland	Eschikon field station	20.05.2016	2016	Input (Bayer, 06.04.2016)	NA	NA	654	YES	c1_2_8A3
c1_2_8B1	c1	RUNAL	2	8	B	Switzerland	Eschikon field station	20.05.2016	2016	Input (Bayer, 06.04.2016)	NA	NA	911	YES	c1_2_8B1
c1_2_8B2	c1	RUNAL	2	8	B	Switzerland	Eschikon field station	20.05.2016	2016	Input (Bayer, 06.04.2016)	NA	NA	555	YES	c1_2_8B2
c1_2_9A1	c1	RUNAL	2	9	A	Switzerland	Eschikon field station	20.05.2016	2016	Input (Bayer, 06.04.2016)	NA	NA	1562	NA	c1_2_9A1
c1_2_9A2	c1	RUNAL	2	9	A	Switzerland	Eschikon field station	20.05.2016	2016	Input (Bayer, 06.04.2016)	NA	NA	1382	YES	c1_2_9A2
c1_2_9A3	c1	RUNAL	2	9	A	Switzerland	Eschikon field station	20.05.2016	2016	Input (Bayer, 06.04.2016)	NA	NA	1562	NA	c1_2_9A3
c1_2_9B1	c1	RUNAL	2	9	B	Switzerland	Eschikon field station	20.05.2016	2016	Input (Bayer, 06.04.2016)	NA	NA	1016	YES	c1_2_9B1
c1_2_9B2	c1	RUNAL	2	9	B	Switzerland	Eschikon field station	20.05.2016	2016	Input (Bayer, 06.04.2016)	NA	NA	592	NA	c1_2_9B2
c1_2_9B3	c1	RUNAL	2	9	B	Switzerland	Eschikon field station	20.05.2016	2016	Input (Bayer, 06.04.2016)	NA	NA	161	YES	c1_2_9B3
c1_237_11A1	c1	SIMANO	237	11	A	Switzerland	Eschikon field station	20.05.2016	2016	Input (Bayer, 06.04.2016)	NA	NA	1179	NA	c1_237_11A1
c1_237_11A2	c1	SIMANO	237	11	A	Switzerland	Eschikon field station	20.05.2016	2016	Input (Bayer, 06.04.2016)	ST16CH_1L32	SRR10728823	NA	YES	c1_237_11A2
c1_237_11A3	c1	SIMANO	237	11	A	Switzerland	Eschikon field station	20.05.2016	2016	Input (Bayer, 06.04.2016)	NA	NA	1198	NA	c1_237_11A3
c1_237_12B1	c1	SIMANO	237	12	B	Switzerland	Eschikon field station	20.05.2016	2016	Input (Bayer, 06.04.2016)	NA	NA	1530	YES	c1_237_12B1
c1_237_12B2	c1	SIMANO	237	12	B	Switzerland	Eschikon field station	20.05.2016	2016	Input (Bayer, 06.04.2016)	NA	NA	1146	NA	c1_237_12B2
c1_237_13A1	c1	SIMANO	237	13	A	Switzerland	Eschikon field station	20.05.2016	2016	Input (Bayer, 06.04.2016)	NA	NA	287	YES	c1_237_13A1
c1_237_13A2	c1	SIMANO	237	13	A	Switzerland	Eschikon field station	20.05.2016	2016	Input (Bayer, 06.04.2016)	NA	NA	290	YES	c1_237_13A2
c1_237_14A3	c1	SIMANO	237	14	A	Switzerland	Eschikon field station	20.05.2016	2016	Input (Bayer, 06.04.2016)	NA	NA	20	YES	c1_237_14A3
c1_237_14B1	c1	SIMANO	237	14	B	Switzerland	Eschikon field station	20.05.2016	2016	Input (Bayer, 06.04.2016)	ST16CH_1L46	SRR10728822	1469	NA	c1_237_14B1
c1_237_6B1	c1	SIMANO	237	6	B	Switzerland	Eschikon field station	20.05.2016	2016	Input (Bayer, 06.04.2016)	NA	NA	1291	YES	c1_237_6B1
c1_237_7B1	c1	SIMANO	237	7	B	Switzerland	Eschikon field station	20.05.2016	2016	Input (Bayer, 06.04.2016)	NA	NA	1398	YES	c1_237_7B1
c1_237_7B2	c1	SIMANO	237	7	B	Switzerland	Eschikon field station	20.05.2016	2016	Input (Bayer, 06.04.2016)	NA	NA	1399	YES	c1_237_7B2
c1_237_8A1	c1	SIMANO	237	8	A	Switzerland	Eschikon field station	20.05.2016	2016	Input (Bayer, 06.04.2016)	NA	NA	1243	YES	c1_237_8A1
c1_237_8A2	c1	SIMANO	237	8	A	Switzerland	Eschikon field station	20.05.2016	2016	Input (Bayer, 06.04.2016)	NA	NA	1242	YES	c1_237_8A2
c1_237_8B1	c1	SIMANO	237	8	B	Switzerland	Eschikon field station	20.05.2016	2016	Input (Bayer, 06.04.2016)	NA	NA	1269	NA	c1_237_8B1
c1_237_8B2	c1	SIMANO	237	8	B	Switzerland	Eschikon field station	20.05.2016	2016	Input (Bayer, 06.04.2016)	NA	NA	1269	NA	c1_237_8B2
c1_237_8B3	c1	SIMANO	237	8	B	Switzerland	Eschikon field station	20.05.2016	2016	Input (Bayer, 06.04.2016)	NA	NA	1269	NA	c1_237_8B3
c1_25_10A1	c1	CH CLARO	25	10	A	Switzerland	Eschikon field station	20.05.2016	2016	Input (Bayer, 06.04.2016)	NA	NA	314	NA	c1_25_10A1
c1_25_10A2	c1	CH CLARO	25	10	A	Switzerland	Eschikon field station	20.05.2016	2016	Input (Bayer, 06.04.2016)	NA	NA	308	YES	c1_25_10A2
c1_25_10A3	c1	CH CLARO	25	10	A	Switzerland	Eschikon field station	20.05.2016	2016	Input (Bayer, 06.04.2016)	NA	NA	315	NA	c1_25_10A3
c1_25_10B1	c1	CH CLARO	25	10	B	Switzerland	Eschikon field station	20.05.2016	2016	Input (Bayer, 06.04.2016)	NA	NA	284	YES	c1_25_10B1
c1_25_10B2	c1	CH CLARO	25	10	B	Switzerland	Eschikon field station	20.05.2016	2016	Input (Bayer, 06.04.2016)	NA	NA	266	NA	c1_25_10B2
c1_25_10B3	c1	CH CLARO	25	10	B	Switzerland	Eschikon field station	20.05.2016	2016	Input (Bayer, 06.04.2016)	NA	NA	426	NA	c1_25_10B3
c1_25_11A1	c1	CH CLARO	25	11	A	Switzerland	Eschikon field station	20.05.2016	2016	Input (Bayer, 06.04.2016)	NA	NA	596	NA	c1_25_11A1
c1_25_11A2	c1	CH CLARO	25	11	A	Switzerland	Eschikon field station	20.05.2016	2016	Input (Bayer, 06.04.2016)	NA	NA	578	NA	c1_25_11A2
c1_25_11A3	c1	CH CLARO	25	11	A	Switzerland	Eschikon field station	20.05.2016	2016	Input (Bayer, 06.04.2016)	ST16CH_1C52	SRR10728850	578	YES	c1_25_11A3
c1_25_11B1	c1	CH CLARO	25	11	B	Switzerland	Eschikon field station	20.05.2016	2016	Input (Bayer, 06.04.2016)	NA	NA	401	NA	c1_25_11B1
c1_25_11B2	c1	CH CLARO	25	11	B	Switzerland	Eschikon field station	20.05.2016	2016	Input (Bayer, 06.04.2016)	NA	NA	401	NA	c1_25_11B2
c1_25_11B3	c1	CH CLARO	25	11	B	Switzerland	Eschikon field station	20.05.2016	2016	Input (Bayer, 06.04.2016)	NA	NA	407	NA	c1_25_11B3
c1_25_12A2	c1	CH CLARO	25	12	A	Switzerland	Eschikon field station	20.05.2016	2016	Input (Bayer, 06.04.2016)	NA	NA	223	NA	c1_25_12A2
c1_25_12A3	c1	CH CLARO	25	12	A	Switzerland	Eschikon field station	20.05.2016	2016	Input (Bayer, 06.04.2016)	NA	NA	223	NA	c1_25_12A3
c1_25_12B1	c1	CH CLARO	25	12	B	Switzerland	Eschikon field station	20.05.2016	2016	Input (Bayer, 06.04.2016)	NA	NA	800	YES	c1_25_12B1
c1_25_12B2	c1	CH CLARO	25	12	B	Switzerland	Eschikon field station	20.05.2016	2016	Input (Bayer, 06.04.2016)	NA	NA	982	NA	c1_25_12B2
c1_25_12B3	c1	CH CLARO	25	12	B	Switzerland	Eschikon field station	20.05.2016	2016	Input (Bayer, 06.04.2016)	NA	NA	982	NA	c1_25_12B3
c1_25_13A1	c1	CH CLARO	25	13	A	Switzerland	Eschikon field station	20.05.2016	2016	Input (Bayer, 06.04.2016)	NA	NA	50	NA	c1_25_13A1
c1_25_13A2	c1	CH CLARO	25	13	A	Switzerland	Eschikon field station	20.05.2016	2016	Input (Bayer, 06.04.2016)	NA	NA	50	NA	c1_25_13A2
c1_25_13A3	c1	CH CLARO	25	13	A	Switzerland	Eschikon field station	20.05.2016	2016	Input (Bayer, 06.04.2016)	NA	NA	50	NA	c1_25_13A3
c1_25_13B1	c1	CH CLARO	25	13	B	Switzerland	Eschikon field station	20.05.2016	2016	Input (Bayer, 06.04.2016)	ST16CH_1C65	SRR10728849	381	NA	c1_25_13B1
c1_25_13B2	c1	CH CLARO	25	13	B	Switzerland	Eschikon field station	20.05.2016	2016	Input (Bayer, 06.04.2016)	NA	NA	402	NA	c1_25_13B2
c1_25_13B3	c1	CH CLARO	25	13	B	Switzerland	Eschikon field station	20.05.2016	2016	Input (Bayer, 06.04.2016)	NA	NA	401	NA	c1_25_13B3
c1_25_14A1	c1	CH CLARO	25	14	A	Switzerland	Eschikon field station	20.05.2016	2016	Input (Bayer, 06.04.2016)	NA	NA	197	NA	c1_25_14A1
c1_25_14A2	c1	CH CLARO	25	14	A	Switzerland	Eschikon field station	20.05.2016	2016	Input (Bayer, 06.04.2016)	NA	NA	197	NA	c1_25_14A2
c1_25_15A1	c1	CH CLARO	25	15	A	Switzerland	Eschikon field station	20.05.2016	2016	Input (Bayer, 06.04.2016)	NA	NA	238	NA	c1_25_15A1
c1_25_15A2	c1	CH CLARO	25	15	A	Switzerland	Eschikon field station	20.05.2016	2016	Input (Bayer, 06.04.2016)	NA	NA	143	YES	c1_25_15A2
c1_25_15A3	c1	CH CLARO	25	15	A	Switzerland	Eschikon field station	20.05.2016	2016	Input (Bayer, 06.04.2016)	NA	NA	239	NA	c1_25_15A3
c1_25_15B1	c1	CH CLARO	25	15	B	Switzerland	Eschikon field station	20.05.2016	2016	Input (Bayer, 06.04.2016)	NA	NA	1197	NA	c1_25_15B1
c1_25_15B2	c1	CH CLARO	25	15	B	Switzerland	Eschikon field station	20.05.2016	2016	Input (Bayer, 06.04.2016)	NA	NA	1197	NA	c1_25_15B2
c1_25_1A1	c1	CH CLARO	25	1	A	Switzerland	Eschikon field station	20.05.2016	2016	Input (Bayer, 06.04.2016)	NA	NA	366	NA	c1_25_1A1
c1_25_1A2	c1	CH CLARO	25	1	A	Switzerland	Eschikon field station	20.05.2016	2016	Input (Bayer, 06.04.2016)	NA	NA	366	NA	c1_25_1A2
c1_25_1A3	c1	CH CLARO	25	1	A	Switzerland	Eschikon field station	20.05.2016	2016	Input (Bayer, 06.04.2016)	NA	NA	345	YES	c1_25_1A3
c1_25_1B1	c1	CH CLARO	25	1	B	Switzerland	Eschikon field station	20.05.2016	2016	Input (Bayer, 06.04.2016)	NA	NA	650	NA	c1_25_1B1
c1_25_1B2	c1	CH CLARO	25	1	B	Switzerland	Eschikon field station	20.05.2016	2016	Input (Bayer, 06.04.2016)	NA	NA	960	YES	c1_25_1B2
c1_25_1B3	c1	CH CLARO	25	1	B	Switzerland	Eschikon field station	20.05.2016	2016	Input (Bayer, 06.04.2016)	NA	NA	1215	NA	c1_25_1B3
c1_25_2A2	c1	CH CLARO	25	2	A	Switzerland	Eschikon field station	20.05.2016	2016	Input (Bayer, 06.04.2016)	NA	NA	178	YES	c1_25_2A2
c1_25_2A3	c1	CH CLARO	25	2	A	Switzerland	Eschikon field station	20.05.2016	2016	Input (Bayer, 06.04.2016)	NA	NA	213	NA	c1_25_2A3
c1_25_2B1	c1	CH CLARO	25	2	B	Switzerland	Eschikon field station	20.05.2016	2016	Input (Bayer, 06.04.2016)	NA	NA	607	NA	c1_25_2B1
c1_25_2B2	c1	CH CLARO	25	2	B	Switzerland	Eschikon field station	20.05.2016	2016	Input (Bayer, 06.04.2016)	NA	NA	1008	YES	c1_25_2B2
c1_25_2B3	c1	CH CLARO	25	2	B	Switzerland	Eschikon field station	20.05.2016	2016	Input (Bayer, 06.04.2016)	NA	NA	651	NA	c1_25_2B3
c1_25_3A1	c1	CH CLARO	25	3	A	Switzerland	Eschikon field station	20.05.2016	2016	Input (Bayer, 06.04.2016)	ST16CH_1C12	SRR10728852	123	YES	c1_25_3A1
c1_25_3A2	c1	CH CLARO	25	3	A	Switzerland	Eschikon field station	20.05.2016	2016	Input (Bayer, 06.04.2016)	NA	NA	122	NA	c1_25_3A2
c1_25_3A3	c1	CH CLARO	25	3	A	Switzerland	Eschikon field station	20.05.2016	2016	Input (Bayer, 06.04.2016)	NA	NA	121	NA	c1_25_3A3
c1_25_3B1	c1	CH CLARO	25	3	B	Switzerland	Eschikon field station	20.05.2016	2016	Input (Bayer, 06.04.2016)	NA	NA	123	YES	c1_25_3B1
c1_25_3B3	c1	CH CLARO	25	3	B	Switzerland	Eschikon field station	20.05.2016	2016	Input (Bayer, 06.04.2016)	NA	NA	122	NA	c1_25_3B3
c1_25_4B1	c1	CH CLARO	25	4	B	Switzerland	Eschikon field station	20.05.2016	2016	Input (Bayer, 06.04.2016)	NA	NA	1149	NA	c1_25_4B1
c1_25_5A1	c1	CH CLARO	25	5	A	Switzerland	Eschikon field station	20.05.2016	2016	Input (Bayer, 06.04.2016)	NA	NA	122	NA	c1_25_5A1
c1_25_5A2	c1	CH CLARO	25	5	A	Switzerland	Eschikon field station	20.05.2016	2016	Input (Bayer, 06.04.2016)	NA	NA	107	YES	c1_25_5A2
c1_25_5A3	c1	CH CLARO	25	5	A	Switzerland	Eschikon field station	20.05.2016	2016	Input (Bayer, 06.04.2016)	NA	NA	77	NA	c1_25_5A3
c1_25_5B1	c1	CH CLARO	25	5	B	Switzerland	Eschikon field station	20.05.2016	2016	Input (Bayer, 06.04.2016)	NA	NA	131	YES	c1_25_5B1
c1_25_5B2	c1	CH CLARO	25	5	B	Switzerland	Eschikon field station	20.05.2016	2016	Input (Bayer, 06.04.2016)	NA	NA	1026	NA	c1_25_5B2
c1_25_5B3	c1	CH CLARO	25	5	B	Switzerland	Eschikon field station	20.05.2016	2016	Input (Bayer, 06.04.2016)	NA	NA	1025	NA	c1_25_5B3
c1_25_6A1	c1	CH CLARO	25	6	A	Switzerland	Eschikon field station	20.05.2016	2016	Input (Bayer, 06.04.2016)	NA	NA	738	YES	c1_25_6A1
c1_25_6A3	c1	CH CLARO	25	6	A	Switzerland	Eschikon field station	20.05.2016	2016	Input (Bayer, 06.04.2016)	NA	NA	583	NA	c1_25_6A3
c1_25_6B1	c1	CH CLARO	25	6	B	Switzerland	Eschikon field station	20.05.2016	2016	Input (Bayer, 06.04.2016)	NA	NA	56	NA	c1_25_6B1
c1_25_6B2	c1	CH CLARO	25	6	B	Switzerland	Eschikon field station	20.05.2016	2016	Input (Bayer, 06.04.2016)	NA	NA	487	NA	c1_25_6B2
c1_25_6B3	c1	CH CLARO	25	6	B	Switzerland	Eschikon field station	20.05.2016	2016	Input (Bayer, 06.04.2016)	NA	NA	96	NA	c1_25_6B3
c1_25_7B1	c1	CH CLARO	25	7	B	Switzerland	Eschikon field station	20.05.2016	2016	Input (Bayer, 06.04.2016)	NA	NA	316	YES	c1_25_7B1
c1_25_7B2	c1	CH CLARO	25	7	B	Switzerland	Eschikon field station	20.05.2016	2016	Input (Bayer, 06.04.2016)	ST16CH_1C31	SRR10728851	317	NA	c1_25_7B2
c1_25_8A1	c1	CH CLARO	25	8	A	Switzerland	Eschikon field station	20.05.2016	2016	Input (Bayer, 06.04.2016)	NA	NA	1110	YES	c1_25_8A1
c1_25_8A3	c1	CH CLARO	25	8	A	Switzerland	Eschikon field station	20.05.2016	2016	Input (Bayer, 06.04.2016)	NA	NA	1200	NA	c1_25_8A3
c1_25_8B1	c1	CH CLARO	25	8	B	Switzerland	Eschikon field station	20.05.2016	2016	Input (Bayer, 06.04.2016)	NA	NA	311	YES	c1_25_8B1
c1_25_8B2	c1	CH CLARO	25	8	B	Switzerland	Eschikon field station	20.05.2016	2016	Input (Bayer, 06.04.2016)	NA	NA	310	NA	c1_25_8B2
c1_25_8B3	c1	CH CLARO	25	8	B	Switzerland	Eschikon field station	20.05.2016	2016	Input (Bayer, 06.04.2016)	NA	NA	310	NA	c1_25_8B3
c1_25_9A1	c1	CH CLARO	25	9	A	Switzerland	Eschikon field station	20.05.2016	2016	Input (Bayer, 06.04.2016)	NA	NA	825	YES	c1_25_9A1
c1_25_9A2	c1	CH CLARO	25	9	A	Switzerland	Eschikon field station	20.05.2016	2016	Input (Bayer, 06.04.2016)	NA	NA	1204	NA	c1_25_9A2
c1_25_9A3	c1	CH CLARO	25	9	A	Switzerland	Eschikon field station	20.05.2016	2016	Input (Bayer, 06.04.2016)	NA	NA	1204	NA	c1_25_9A3
c1_25_9B1	c1	CH CLARO	25	9	B	Switzerland	Eschikon field station	20.05.2016	2016	Input (Bayer, 06.04.2016)	NA	NA	448	NA	c1_25_9B1
c1_25_9B2	c1	CH CLARO	25	9	B	Switzerland	Eschikon field station	20.05.2016	2016	Input (Bayer, 06.04.2016)	NA	NA	577	NA	c1_25_9B2
c1_25_9B3	c1	CH CLARO	25	9	B	Switzerland	Eschikon field station	20.05.2016	2016	Input (Bayer, 06.04.2016)	NA	NA	577	NA	c1_25_9B3
c1_290_16H1	c1	HALDOR	290	16	H	Switzerland	Eschikon field station	20.05.2016	2016	Input (Bayer, 06.04.2016)	NA	NA	772	NA	c1_290_16H1
c1_290_16H2	c1	HALDOR	290	16	H	Switzerland	Eschikon field station	20.05.2016	2016	Input (Bayer, 06.04.2016)	NA	NA	1166	NA	c1_290_16H2
c1_290_2H1	c1	HALDOR	290	2	H	Switzerland	Eschikon field station	20.05.2016	2016	Input (Bayer, 06.04.2016)	NA	NA	1420	NA	c1_290_2H1
c1_290_2H2	c1	HALDOR	290	2	H	Switzerland	Eschikon field station	20.05.2016	2016	Input (Bayer, 06.04.2016)	NA	NA	1419	NA	c1_290_2H2
c1_290_4H1	c1	HALDOR	290	4	H	Switzerland	Eschikon field station	20.05.2016	2016	Input (Bayer, 06.04.2016)	NA	NA	151	NA	c1_290_4H1
c1_290_6H1	c1	HALDOR	290	6	H	Switzerland	Eschikon field station	20.05.2016	2016	Input (Bayer, 06.04.2016)	NA	NA	1387	NA	c1_290_6H1
c1_290_9H1	c1	HALDOR	290	9	H	Switzerland	Eschikon field station	20.05.2016	2016	Input (Bayer, 06.04.2016)	NA	NA	972	NA	c1_290_9H1
c1_335_10A1	c1	AUBUSSON	335	10	A	Switzerland	Eschikon field station	20.05.2016	2016	Input (Bayer, 06.04.2016)	NA	NA	613	YES	c1_335_10A1
c1_335_10B1	c1	AUBUSSON	335	10	B	Switzerland	Eschikon field station	20.05.2016	2016	Input (Bayer, 06.04.2016)	NA	NA	1538	YES	c1_335_10B1
c1_335_10B2	c1	AUBUSSON	335	10	B	Switzerland	Eschikon field station	20.05.2016	2016	Input (Bayer, 06.04.2016)	NA	NA	1125	NA	c1_335_10B2
c1_335_11B1	c1	AUBUSSON	335	11	B	Switzerland	Eschikon field station	20.05.2016	2016	Input (Bayer, 06.04.2016)	NA	NA	1090	NA	c1_335_11B1
c1_335_11B2	c1	AUBUSSON	335	11	B	Switzerland	Eschikon field station	20.05.2016	2016	Input (Bayer, 06.04.2016)	NA	NA	1033	NA	c1_335_11B2
c1_335_11B3	c1	AUBUSSON	335	11	B	Switzerland	Eschikon field station	20.05.2016	2016	Input (Bayer, 06.04.2016)	NA	NA	1096	YES	c1_335_11B3
c1_335_14B1	c1	AUBUSSON	335	14	B	Switzerland	Eschikon field station	20.05.2016	2016	Input (Bayer, 06.04.2016)	NA	NA	236	YES	c1_335_14B1
c1_335_15A1	c1	AUBUSSON	335	15	A	Switzerland	Eschikon field station	20.05.2016	2016	Input (Bayer, 06.04.2016)	NA	NA	1180	YES	c1_335_15A1
c1_335_15A2	c1	AUBUSSON	335	15	A	Switzerland	Eschikon field station	20.05.2016	2016	Input (Bayer, 06.04.2016)	NA	NA	1181	YES	c1_335_15A2
c1_335_15B1	c1	AUBUSSON	335	15	B	Switzerland	Eschikon field station	20.05.2016	2016	Input (Bayer, 06.04.2016)	NA	NA	1299	YES	c1_335_15B1
c1_335_15B2	c1	AUBUSSON	335	15	B	Switzerland	Eschikon field station	20.05.2016	2016	Input (Bayer, 06.04.2016)	NA	NA	1247	YES	c1_335_15B2
c1_335_1A1	c1	AUBUSSON	335	1	A	Switzerland	Eschikon field station	20.05.2016	2016	Input (Bayer, 06.04.2016)	NA	NA	1309	YES	c1_335_1A1
c1_335_1B1	c1	AUBUSSON	335	1	B	Switzerland	Eschikon field station	20.05.2016	2016	Input (Bayer, 06.04.2016)	NA	NA	1310	YES	c1_335_1B1
c1_335_2B1	c1	AUBUSSON	335	2	B	Switzerland	Eschikon field station	20.05.2016	2016	Input (Bayer, 06.04.2016)	NA	NA	934	NA	c1_335_2B1
c1_335_2B2	c1	AUBUSSON	335	2	B	Switzerland	Eschikon field station	20.05.2016	2016	Input (Bayer, 06.04.2016)	NA	NA	1145	YES	c1_335_2B2
c1_335_6A1	c1	AUBUSSON	335	6	A	Switzerland	Eschikon field station	20.05.2016	2016	Input (Bayer, 06.04.2016)	NA	NA	241	YES	c1_335_6A1
c1_335_7A1	c1	AUBUSSON	335	7	A	Switzerland	Eschikon field station	20.05.2016	2016	Input (Bayer, 06.04.2016)	NA	NA	1386	YES	c1_335_7A1
c1_335_7B1	c1	AUBUSSON	335	7	B	Switzerland	Eschikon field station	20.05.2016	2016	Input (Bayer, 06.04.2016)	NA	NA	753	YES	c1_335_7B1
c1_335_7B2	c1	AUBUSSON	335	7	B	Switzerland	Eschikon field station	20.05.2016	2016	Input (Bayer, 06.04.2016)	NA	NA	1006	NA	c1_335_7B2
c1_335_8A1	c1	AUBUSSON	335	8	A	Switzerland	Eschikon field station	20.05.2016	2016	Input (Bayer, 06.04.2016)	NA	NA	175	NA	c1_335_8A1
c1_335_8A2	c1	AUBUSSON	335	8	A	Switzerland	Eschikon field station	20.05.2016	2016	Input (Bayer, 06.04.2016)	NA	NA	176	YES	c1_335_8A2
c1_335_8B1	c1	AUBUSSON	335	8	B	Switzerland	Eschikon field station	20.05.2016	2016	Input (Bayer, 06.04.2016)	NA	NA	237	NA	c1_335_8B1
c1_335_8B2	c1	AUBUSSON	335	8	B	Switzerland	Eschikon field station	20.05.2016	2016	Input (Bayer, 06.04.2016)	NA	NA	242	NA	c1_335_8B2
c1_335_9A1	c1	AUBUSSON	335	9	A	Switzerland	Eschikon field station	20.05.2016	2016	Input (Bayer, 06.04.2016)	NA	NA	242	NA	c1_335_9A1
c1_335_9A2	c1	AUBUSSON	335	9	A	Switzerland	Eschikon field station	20.05.2016	2016	Input (Bayer, 06.04.2016)	NA	NA	225	YES	c1_335_9A2
c1_335_9B1	c1	AUBUSSON	335	9	B	Switzerland	Eschikon field station	20.05.2016	2016	Input (Bayer, 06.04.2016)	NA	NA	277	YES	c1_335_9B1
c1_335_9B2	c1	AUBUSSON	335	9	B	Switzerland	Eschikon field station	20.05.2016	2016	Input (Bayer, 06.04.2016)	NA	NA	269	NA	c1_335_9B2
c1_335_9B3	c1	AUBUSSON	335	9	B	Switzerland	Eschikon field station	20.05.2016	2016	Input (Bayer, 06.04.2016)	NA	NA	292	YES	c1_335_9B3
c1_345_2H1	c1	FLORETT	345	2	H	Switzerland	Eschikon field station	20.05.2016	2016	Input (Bayer, 06.04.2016)	NA	NA	1201	NA	c1_345_2H1
c1_345_2H2	c1	FLORETT	345	2	H	Switzerland	Eschikon field station	20.05.2016	2016	Input (Bayer, 06.04.2016)	NA	NA	1085	NA	c1_345_2H2
c1_438_13A1	c1	ARINA	438	13	A	Switzerland	Eschikon field station	20.05.2016	2016	Input (Bayer, 06.04.2016)	ST16CH_1M59	SRR10728818	1277	YES	c1_438_13A1
c1_438_13A2	c1	ARINA	438	13	A	Switzerland	Eschikon field station	20.05.2016	2016	Input (Bayer, 06.04.2016)	NA	NA	1337	NA	c1_438_13A2
c1_438_2A1	c1	ARINA	438	2	A	Switzerland	Eschikon field station	20.05.2016	2016	Input (Bayer, 06.04.2016)	NA	NA	263	NA	c1_438_2A1
c1_438_2A2	c1	ARINA	438	2	A	Switzerland	Eschikon field station	20.05.2016	2016	Input (Bayer, 06.04.2016)	NA	NA	262	YES	c1_438_2A2
c1_438_3A1	c1	ARINA	438	3	A	Switzerland	Eschikon field station	20.05.2016	2016	Input (Bayer, 06.04.2016)	NA	NA	261	NA	c1_438_3A1
c1_438_5A1	c1	ARINA	438	5	A	Switzerland	Eschikon field station	20.05.2016	2016	Input (Bayer, 06.04.2016)	ST16CH_1M21	SRR10728821	1494	NA	c1_438_5A1
c1_438_5A2	c1	ARINA	438	5	A	Switzerland	Eschikon field station	20.05.2016	2016	Input (Bayer, 06.04.2016)	NA	NA	1505	YES	c1_438_5A2
c1_438_6A1	c1	ARINA	438	6	A	Switzerland	Eschikon field station	20.05.2016	2016	Input (Bayer, 06.04.2016)	NA	NA	1521	YES	c1_438_6A1
c1_438_6A2	c1	ARINA	438	6	A	Switzerland	Eschikon field station	20.05.2016	2016	Input (Bayer, 06.04.2016)	NA	NA	1517	YES	c1_438_6A2
c1_438_6B1	c1	ARINA	438	6	B	Switzerland	Eschikon field station	20.05.2016	2016	Input (Bayer, 06.04.2016)	ST16CH_1M28	SRR10728820	887	YES	c1_438_6B1
c1_438_6B2	c1	ARINA	438	6	B	Switzerland	Eschikon field station	20.05.2016	2016	Input (Bayer, 06.04.2016)	NA	NA	1075	NA	c1_438_6B2
c1_438_6B3	c1	ARINA	438	6	B	Switzerland	Eschikon field station	20.05.2016	2016	Input (Bayer, 06.04.2016)	NA	NA	1041	YES	c1_438_6B3
c1_438_7B1	c1	ARINA	438	7	B	Switzerland	Eschikon field station	20.05.2016	2016	Input (Bayer, 06.04.2016)	ST16CH_1M33	SRR10728819	1156	YES	c1_438_7B1
c1_438_7B2	c1	ARINA	438	7	B	Switzerland	Eschikon field station	20.05.2016	2016	Input (Bayer, 06.04.2016)	NA	NA	1007	YES	c1_438_7B2
c1_438_7B3	c1	ARINA	438	7	B	Switzerland	Eschikon field station	20.05.2016	2016	Input (Bayer, 06.04.2016)	NA	NA	1493	YES	c1_438_7B3
c1_438_8A1	c1	ARINA	438	8	A	Switzerland	Eschikon field station	20.05.2016	2016	Input (Bayer, 06.04.2016)	NA	NA	1518	NA	c1_438_8A1
c1_438_8H3	c1	ARINA	438	8	H	Switzerland	Eschikon field station	20.05.2016	2016	Input (Bayer, 06.04.2016)	NA	NA	1518	NA	c1_438_8H3
c1_438_8J1	c1	ARINA	438	8	J	Switzerland	Eschikon field station	20.05.2016	2016	Input (Bayer, 06.04.2016)	NA	NA	976	YES	c1_438_8J1
c1_438_8J2	c1	ARINA	438	8	J	Switzerland	Eschikon field station	20.05.2016	2016	Input (Bayer, 06.04.2016)	NA	NA	950	YES	c1_438_8J2
c1_439_10B1	c1	FOREL	439	10	B	Switzerland	Eschikon field station	20.05.2016	2016	Input (Bayer, 06.04.2016)	NA	NA	769	YES	c1_439_10B1
c1_439_10B2	c1	FOREL	439	10	B	Switzerland	Eschikon field station	20.05.2016	2016	Input (Bayer, 06.04.2016)	NA	NA	1198	NA	c1_439_10B2
c1_439_10B3	c1	FOREL	439	10	B	Switzerland	Eschikon field station	20.05.2016	2016	Input (Bayer, 06.04.2016)	NA	NA	1091	NA	c1_439_10B3
c1_439_11A1	c1	FOREL	439	11	A	Switzerland	Eschikon field station	20.05.2016	2016	Input (Bayer, 06.04.2016)	NA	NA	1160	NA	c1_439_11A1
c1_439_11A2	c1	FOREL	439	11	A	Switzerland	Eschikon field station	20.05.2016	2016	Input (Bayer, 06.04.2016)	NA	NA	954	NA	c1_439_11A2
c1_439_11A3	c1	FOREL	439	11	A	Switzerland	Eschikon field station	20.05.2016	2016	Input (Bayer, 06.04.2016)	NA	NA	771	YES	c1_439_11A3
c1_439_12A1	c1	FOREL	439	12	A	Switzerland	Eschikon field station	20.05.2016	2016	Input (Bayer, 06.04.2016)	NA	NA	601	NA	c1_439_12A1
c1_439_12A2	c1	FOREL	439	12	A	Switzerland	Eschikon field station	20.05.2016	2016	Input (Bayer, 06.04.2016)	NA	NA	644	NA	c1_439_12A2
c1_439_12B1	c1	FOREL	439	12	B	Switzerland	Eschikon field station	20.05.2016	2016	Input (Bayer, 06.04.2016)	NA	NA	644	NA	c1_439_12B1
c1_439_13A1	c1	FOREL	439	13	A	Switzerland	Eschikon field station	20.05.2016	2016	Input (Bayer, 06.04.2016)	NA	NA	303	YES	c1_439_13A1
c1_439_13B1	c1	FOREL	439	13	B	Switzerland	Eschikon field station	20.05.2016	2016	Input (Bayer, 06.04.2016)	NA	NA	1497	YES	c1_439_13B1
c1_439_13B2	c1	FOREL	439	13	B	Switzerland	Eschikon field station	20.05.2016	2016	Input (Bayer, 06.04.2016)	NA	NA	1421	YES	c1_439_13B2
c1_439_1A1	c1	FOREL	439	1	A	Switzerland	Eschikon field station	20.05.2016	2016	Input (Bayer, 06.04.2016)	ST16CH_1N1	SRR10728817	921	YES	c1_439_1A1
c1_439_1A2	c1	FOREL	439	1	A	Switzerland	Eschikon field station	20.05.2016	2016	Input (Bayer, 06.04.2016)	NA	NA	1118	NA	c1_439_1A2
c1_439_1C1	c1	FOREL	439	1	C	Switzerland	Eschikon field station	20.05.2016	2016	Input (Bayer, 06.04.2016)	NA	NA	120	NA	c1_439_1C1
c1_439_1C2	c1	FOREL	439	1	C	Switzerland	Eschikon field station	20.05.2016	2016	Input (Bayer, 06.04.2016)	ST16CH_1N6	SRR10728815	127	NA	c1_439_1C2
c1_439_2A2	c1	FOREL	439	2	A	Switzerland	Eschikon field station	20.05.2016	2016	Input (Bayer, 06.04.2016)	NA	NA	125	NA	c1_439_2A2
c1_439_2A3	c1	FOREL	439	2	A	Switzerland	Eschikon field station	20.05.2016	2016	Input (Bayer, 06.04.2016)	NA	NA	128	NA	c1_439_2A3
c1_439_3A2	c1	FOREL	439	3	A	Switzerland	Eschikon field station	20.05.2016	2016	Input (Bayer, 06.04.2016)	NA	NA	1582	NA	c1_439_3A2
c1_439_3B1	c1	FOREL	439	3	B	Switzerland	Eschikon field station	20.05.2016	2016	Input (Bayer, 06.04.2016)	NA	NA	1581	NA	c1_439_3B1
c1_439_6B1	c1	FOREL	439	6	B	Switzerland	Eschikon field station	20.05.2016	2016	Input (Bayer, 06.04.2016)	ST16CH_1N25	SRR10728816	1244	NA	c1_439_6B1
c1_439_6B2	c1	FOREL	439	6	B	Switzerland	Eschikon field station	20.05.2016	2016	Input (Bayer, 06.04.2016)	NA	NA	1271	NA	c1_439_6B2
c1_439_8B1	c1	FOREL	439	8	B	Switzerland	Eschikon field station	20.05.2016	2016	Input (Bayer, 06.04.2016)	NA	NA	851	YES	c1_439_8B1
c1_439_8B2	c1	FOREL	439	8	B	Switzerland	Eschikon field station	20.05.2016	2016	Input (Bayer, 06.04.2016)	NA	NA	850	YES	c1_439_8B2
c1_439_8B3	c1	FOREL	439	8	B	Switzerland	Eschikon field station	20.05.2016	2016	Input (Bayer, 06.04.2016)	NA	NA	876	NA	c1_439_8B3
c1_439_9A2	c1	FOREL	439	9	A	Switzerland	Eschikon field station	20.05.2016	2016	Input (Bayer, 06.04.2016)	NA	NA	995	NA	c1_439_9A2
c1_439_9A3	c1	FOREL	439	9	A	Switzerland	Eschikon field station	20.05.2016	2016	Input (Bayer, 06.04.2016)	NA	NA	1178	YES	c1_439_9A3
c1_439_9B1	c1	FOREL	439	9	B	Switzerland	Eschikon field station	20.05.2016	2016	Input (Bayer, 06.04.2016)	NA	NA	869	NA	c1_439_9B1
c1_439_9B2	c1	FOREL	439	9	B	Switzerland	Eschikon field station	20.05.2016	2016	Input (Bayer, 06.04.2016)	NA	NA	947	NA	c1_439_9B2
c1_439_9B3	c1	FOREL	439	9	B	Switzerland	Eschikon field station	20.05.2016	2016	Input (Bayer, 06.04.2016)	NA	NA	819	YES	c1_439_9B3
c1_45_13A1	c1	CH COMBIN	45	13	A	Switzerland	Eschikon field station	20.05.2016	2016	Input (Bayer, 06.04.2016)	NA	NA	650	NA	c1_45_13A1
c1_45_13B2	c1	CH COMBIN	45	13	B	Switzerland	Eschikon field station	20.05.2016	2016	Input (Bayer, 06.04.2016)	NA	NA	4	NA	c1_45_13B2
c1_45_14A1	c1	CH COMBIN	45	14	A	Switzerland	Eschikon field station	20.05.2016	2016	Input (Bayer, 06.04.2016)	NA	NA	1287	NA	c1_45_14A1
c1_45_14A2	c1	CH COMBIN	45	14	A	Switzerland	Eschikon field station	20.05.2016	2016	Input (Bayer, 06.04.2016)	NA	NA	1287	NA	c1_45_14A2
c1_45_14A3	c1	CH COMBIN	45	14	A	Switzerland	Eschikon field station	20.05.2016	2016	Input (Bayer, 06.04.2016)	NA	NA	1048	NA	c1_45_14A3
c1_45_15A1	c1	CH COMBIN	45	15	A	Switzerland	Eschikon field station	20.05.2016	2016	Input (Bayer, 06.04.2016)	NA	NA	1048	NA	c1_45_15A1
c1_45_15A2	c1	CH COMBIN	45	15	A	Switzerland	Eschikon field station	20.05.2016	2016	Input (Bayer, 06.04.2016)	NA	NA	1048	YES	c1_45_15A2
c1_45_15A3	c1	CH COMBIN	45	15	A	Switzerland	Eschikon field station	20.05.2016	2016	Input (Bayer, 06.04.2016)	NA	NA	1280	NA	c1_45_15A3
c1_45_16A1	c1	CH COMBIN	45	16	A	Switzerland	Eschikon field station	20.05.2016	2016	Input (Bayer, 06.04.2016)	NA	NA	1287	NA	c1_45_16A1
c1_45_16A3	c1	CH COMBIN	45	16	A	Switzerland	Eschikon field station	20.05.2016	2016	Input (Bayer, 06.04.2016)	ST16CH_1D23	SRR10728845	1320	NA	c1_45_16A3
c1_45_2A1	c1	CH COMBIN	45	2	A	Switzerland	Eschikon field station	20.05.2016	2016	Input (Bayer, 06.04.2016)	ST16CH_1D1	SRR10728848	1287	NA	c1_45_2A1
c1_45_2A2	c1	CH COMBIN	45	2	A	Switzerland	Eschikon field station	20.05.2016	2016	Input (Bayer, 06.04.2016)	NA	NA	1327	YES	c1_45_2A2
c1_45_2A3	c1	CH COMBIN	45	2	A	Switzerland	Eschikon field station	20.05.2016	2016	Input (Bayer, 06.04.2016)	NA	NA	1289	NA	c1_45_2A3
c1_45_3A1	c1	CH COMBIN	45	3	A	Switzerland	Eschikon field station	20.05.2016	2016	Input (Bayer, 06.04.2016)	NA	NA	689	NA	c1_45_3A1
c1_45_3A2	c1	CH COMBIN	45	3	A	Switzerland	Eschikon field station	20.05.2016	2016	Input (Bayer, 06.04.2016)	NA	NA	691	NA	c1_45_3A2
c1_45_3A3	c1	CH COMBIN	45	3	A	Switzerland	Eschikon field station	20.05.2016	2016	Input (Bayer, 06.04.2016)	NA	NA	716	NA	c1_45_3A3
c1_45_7A1	c1	CH COMBIN	45	7	A	Switzerland	Eschikon field station	20.05.2016	2016	Input (Bayer, 06.04.2016)	NA	NA	688	NA	c1_45_7A1
c1_45_7A2	c1	CH COMBIN	45	7	A	Switzerland	Eschikon field station	20.05.2016	2016	Input (Bayer, 06.04.2016)	ST16CH_1D8	SRR10728844	679	NA	c1_45_7A2
c1_45_7A3	c1	CH COMBIN	45	7	A	Switzerland	Eschikon field station	20.05.2016	2016	Input (Bayer, 06.04.2016)	NA	NA	679	NA	c1_45_7A3
c1_45_8A2	c1	CH COMBIN	45	8	A	Switzerland	Eschikon field station	20.05.2016	2016	Input (Bayer, 06.04.2016)	NA	NA	461	NA	c1_45_8A2
c1_45_8A3	c1	CH COMBIN	45	8	A	Switzerland	Eschikon field station	20.05.2016	2016	Input (Bayer, 06.04.2016)	NA	NA	679	NA	c1_45_8A3
c1_45_8B1	c1	CH COMBIN	45	8	B	Switzerland	Eschikon field station	20.05.2016	2016	Input (Bayer, 06.04.2016)	NA	NA	962	YES	c1_45_8B1
c1_458_10A1	c1	CH CLARO	458	10	A	Switzerland	Eschikon field station	20.05.2016	2016	Input (Bayer, 06.04.2016)	NA	NA	1423	YES	c1_458_10A1
c1_458_10A2	c1	CH CLARO	458	10	A	Switzerland	Eschikon field station	20.05.2016	2016	Input (Bayer, 06.04.2016)	NA	NA	1498	NA	c1_458_10A2
c1_458_10A3	c1	CH CLARO	458	10	A	Switzerland	Eschikon field station	20.05.2016	2016	Input (Bayer, 06.04.2016)	NA	NA	1499	NA	c1_458_10A3
c1_458_10B1	c1	CH CLARO	458	10	B	Switzerland	Eschikon field station	20.05.2016	2016	Input (Bayer, 06.04.2016)	NA	NA	908	YES	c1_458_10B1
c1_458_10B2	c1	CH CLARO	458	10	B	Switzerland	Eschikon field station	20.05.2016	2016	Input (Bayer, 06.04.2016)	NA	NA	1127	NA	c1_458_10B2
c1_458_13A1	c1	CH CLARO	458	13	A	Switzerland	Eschikon field station	20.05.2016	2016	Input (Bayer, 06.04.2016)	NA	NA	1037	NA	c1_458_13A1
c1_458_13A2	c1	CH CLARO	458	13	A	Switzerland	Eschikon field station	20.05.2016	2016	Input (Bayer, 06.04.2016)	NA	NA	462	NA	c1_458_13A2
c1_458_13B1	c1	CH CLARO	458	13	B	Switzerland	Eschikon field station	20.05.2016	2016	Input (Bayer, 06.04.2016)	ST16CH_1O65	SRR10728810	931	NA	c1_458_13B1
c1_458_1A3	c1	CH CLARO	458	1	A	Switzerland	Eschikon field station	20.05.2016	2016	Input (Bayer, 06.04.2016)	ST16CH_1O3	SRR10728812	796	YES	c1_458_1A3
c1_458_2A1	c1	CH CLARO	458	2	A	Switzerland	Eschikon field station	20.05.2016	2016	Input (Bayer, 06.04.2016)	NA	NA	1100	NA	c1_458_2A1
c1_458_2A2	c1	CH CLARO	458	2	A	Switzerland	Eschikon field station	20.05.2016	2016	Input (Bayer, 06.04.2016)	NA	NA	791	NA	c1_458_2A2
c1_458_2A3	c1	CH CLARO	458	2	A	Switzerland	Eschikon field station	20.05.2016	2016	Input (Bayer, 06.04.2016)	NA	NA	1073	NA	c1_458_2A3
c1_458_5A2	c1	CH CLARO	458	5	A	Switzerland	Eschikon field station	20.05.2016	2016	Input (Bayer, 06.04.2016)	NA	NA	76	NA	c1_458_5A2
c1_458_5A3	c1	CH CLARO	458	5	A	Switzerland	Eschikon field station	20.05.2016	2016	Input (Bayer, 06.04.2016)	NA	NA	75	NA	c1_458_5A3
c1_458_6A1	c1	CH CLARO	458	6	A	Switzerland	Eschikon field station	20.05.2016	2016	Input (Bayer, 06.04.2016)	ST16CH_1O25	SRR10728814	141	YES	c1_458_6A1
c1_458_6A2	c1	CH CLARO	458	6	A	Switzerland	Eschikon field station	20.05.2016	2016	Input (Bayer, 06.04.2016)	NA	NA	140	NA	c1_458_6A2
c1_458_6A3	c1	CH CLARO	458	6	A	Switzerland	Eschikon field station	20.05.2016	2016	Input (Bayer, 06.04.2016)	NA	NA	142	NA	c1_458_6A3
c1_458_6B1	c1	CH CLARO	458	6	B	Switzerland	Eschikon field station	20.05.2016	2016	Input (Bayer, 06.04.2016)	NA	NA	1422	YES	c1_458_6B1
c1_458_6B2	c1	CH CLARO	458	6	B	Switzerland	Eschikon field station	20.05.2016	2016	Input (Bayer, 06.04.2016)	NA	NA	1127	NA	c1_458_6B2
c1_458_7B1	c1	CH CLARO	458	7	B	Switzerland	Eschikon field station	20.05.2016	2016	Input (Bayer, 06.04.2016)	NA	NA	372	NA	c1_458_7B1
c1_458_7B2	c1	CH CLARO	458	7	B	Switzerland	Eschikon field station	20.05.2016	2016	Input (Bayer, 06.04.2016)	NA	NA	370	NA	c1_458_7B2
c1_458_7B3	c1	CH CLARO	458	7	B	Switzerland	Eschikon field station	20.05.2016	2016	Input (Bayer, 06.04.2016)	NA	NA	743	YES	c1_458_7B3
c1_458_8B1	c1	CH CLARO	458	8	B	Switzerland	Eschikon field station	20.05.2016	2016	Input (Bayer, 06.04.2016)	NA	NA	1413	NA	c1_458_8B1
c1_458_8B3	c1	CH CLARO	458	8	B	Switzerland	Eschikon field station	20.05.2016	2016	Input (Bayer, 06.04.2016)	NA	NA	1415	NA	c1_458_8B3
c1_458_9A1	c1	CH CLARO	458	9	A	Switzerland	Eschikon field station	20.05.2016	2016	Input (Bayer, 06.04.2016)	NA	NA	1564	NA	c1_458_9A1
c1_458_9A2	c1	CH CLARO	458	9	A	Switzerland	Eschikon field station	20.05.2016	2016	Input (Bayer, 06.04.2016)	NA	NA	1546	YES	c1_458_9A2
c1_458_9A3	c1	CH CLARO	458	9	A	Switzerland	Eschikon field station	20.05.2016	2016	Input (Bayer, 06.04.2016)	NA	NA	1563	NA	c1_458_9A3
c1_459_2J1	c1	FLORETT	459	2	J	Switzerland	Eschikon field station	20.05.2016	2016	Input (Bayer, 06.04.2016)	NA	NA	686	NA	c1_459_2J1
c1_459_2J2	c1	FLORETT	459	2	J	Switzerland	Eschikon field station	20.05.2016	2016	Input (Bayer, 06.04.2016)	NA	NA	693	NA	c1_459_2J2
c1_459_2J3	c1	FLORETT	459	2	J	Switzerland	Eschikon field station	20.05.2016	2016	Input (Bayer, 06.04.2016)	NA	NA	719	NA	c1_459_2J3
c1_459_6S1	c1	FLORETT	459	6	S	Switzerland	Eschikon field station	20.05.2016	2016	Input (Bayer, 06.04.2016)	NA	NA	231	NA	c1_459_6S1
c1_459_6S2	c1	FLORETT	459	6	S	Switzerland	Eschikon field station	20.05.2016	2016	Input (Bayer, 06.04.2016)	NA	NA	230	NA	c1_459_6S2
c1_470_11A2	c1	CH CAMEDO	470	11	A	Switzerland	Eschikon field station	20.05.2016	2016	Input (Bayer, 06.04.2016)	NA	NA	1125	NA	c1_470_11A2
c1_470_2A1	c1	CH CAMEDO	470	2	A	Switzerland	Eschikon field station	20.05.2016	2016	Input (Bayer, 06.04.2016)	NA	NA	43	YES	c1_470_2A1
c1_470_2A2	c1	CH CAMEDO	470	2	A	Switzerland	Eschikon field station	20.05.2016	2016	Input (Bayer, 06.04.2016)	NA	NA	42	NA	c1_470_2A2
c1_470_2A3	c1	CH CAMEDO	470	2	A	Switzerland	Eschikon field station	20.05.2016	2016	Input (Bayer, 06.04.2016)	NA	NA	41	YES	c1_470_2A3
c1_470_4A3	c1	CH CAMEDO	470	4	A	Switzerland	Eschikon field station	20.05.2016	2016	Input (Bayer, 06.04.2016)	NA	NA	NA	YES	c1_470_4A3
c1_470_5A2	c1	CH CAMEDO	470	5	A	Switzerland	Eschikon field station	20.05.2016	2016	Input (Bayer, 06.04.2016)	ST16CH_1P22	SRR10728809	599	NA	c1_470_5A2
c1_470_5B1	c1	CH CAMEDO	470	5	B	Switzerland	Eschikon field station	20.05.2016	2016	Input (Bayer, 06.04.2016)	NA	NA	682	YES	c1_470_5B1
c1_470_5B2	c1	CH CAMEDO	470	5	B	Switzerland	Eschikon field station	20.05.2016	2016	Input (Bayer, 06.04.2016)	NA	NA	709	YES	c1_470_5B2
c1_470_5B3	c1	CH CAMEDO	470	5	B	Switzerland	Eschikon field station	20.05.2016	2016	Input (Bayer, 06.04.2016)	NA	NA	486	YES	c1_470_5B3
c1_470_6A3	c1	CH CAMEDO	470	6	A	Switzerland	Eschikon field station	20.05.2016	2016	Input (Bayer, 06.04.2016)	NA	NA	1466	NA	c1_470_6A3
c1_470_7B1	c1	CH CAMEDO	470	7	B	Switzerland	Eschikon field station	20.05.2016	2016	Input (Bayer, 06.04.2016)	ST16CH_1P35	SRR10728808	1009	YES	c1_470_7B1
c1_470_7B2	c1	CH CAMEDO	470	7	B	Switzerland	Eschikon field station	20.05.2016	2016	Input (Bayer, 06.04.2016)	NA	NA	1232	YES	c1_470_7B2
c1_470_7B3	c1	CH CAMEDO	470	7	B	Switzerland	Eschikon field station	20.05.2016	2016	Input (Bayer, 06.04.2016)	NA	NA	951	NA	c1_470_7B3
c1_51_10B1	c1	FOREL	51	10	B	Switzerland	Eschikon field station	20.05.2016	2016	Input (Bayer, 06.04.2016)	NA	NA	979	NA	c1_51_10B1
c1_51_10B2	c1	FOREL	51	10	B	Switzerland	Eschikon field station	20.05.2016	2016	Input (Bayer, 06.04.2016)	NA	NA	1220	NA	c1_51_10B2
c1_51_10B3	c1	FOREL	51	10	B	Switzerland	Eschikon field station	20.05.2016	2016	Input (Bayer, 06.04.2016)	NA	NA	1220	NA	c1_51_10B3
c1_51_11A1	c1	FOREL	51	11	A	Switzerland	Eschikon field station	20.05.2016	2016	Input (Bayer, 06.04.2016)	NA	NA	1081	NA	c1_51_11A1
c1_51_11A2	c1	FOREL	51	11	A	Switzerland	Eschikon field station	20.05.2016	2016	Input (Bayer, 06.04.2016)	NA	NA	1516	NA	c1_51_11A2
c1_51_11A3	c1	FOREL	51	11	A	Switzerland	Eschikon field station	20.05.2016	2016	Input (Bayer, 06.04.2016)	NA	NA	1081	NA	c1_51_11A3
c1_51_11B2	c1	FOREL	51	11	B	Switzerland	Eschikon field station	20.05.2016	2016	Input (Bayer, 06.04.2016)	NA	NA	734	NA	c1_51_11B2
c1_51_11B3	c1	FOREL	51	11	B	Switzerland	Eschikon field station	20.05.2016	2016	Input (Bayer, 06.04.2016)	NA	NA	812	NA	c1_51_11B3
c1_51_12A2	c1	FOREL	51	12	A	Switzerland	Eschikon field station	20.05.2016	2016	Input (Bayer, 06.04.2016)	ST16CH_1E52	SRR10728841	824	NA	c1_51_12A2
c1_51_12A3	c1	FOREL	51	12	A	Switzerland	Eschikon field station	20.05.2016	2016	Input (Bayer, 06.04.2016)	NA	NA	1126	NA	c1_51_12A3
c1_51_12B1	c1	FOREL	51	12	B	Switzerland	Eschikon field station	20.05.2016	2016	Input (Bayer, 06.04.2016)	NA	NA	82	YES	c1_51_12B1
c1_51_12B2	c1	FOREL	51	12	B	Switzerland	Eschikon field station	20.05.2016	2016	Input (Bayer, 06.04.2016)	NA	NA	82	NA	c1_51_12B2
c1_51_12B3	c1	FOREL	51	12	B	Switzerland	Eschikon field station	20.05.2016	2016	Input (Bayer, 06.04.2016)	NA	NA	79	YES	c1_51_12B3
c1_51_13A2	c1	FOREL	51	13	A	Switzerland	Eschikon field station	20.05.2016	2016	Input (Bayer, 06.04.2016)	NA	NA	1434	NA	c1_51_13A2
c1_51_13A3	c1	FOREL	51	13	A	Switzerland	Eschikon field station	20.05.2016	2016	Input (Bayer, 06.04.2016)	NA	NA	1434	NA	c1_51_13A3
c1_51_14A1	c1	FOREL	51	14	A	Switzerland	Eschikon field station	20.05.2016	2016	Input (Bayer, 06.04.2016)	NA	NA	636	YES	c1_51_14A1
c1_51_14A2	c1	FOREL	51	14	A	Switzerland	Eschikon field station	20.05.2016	2016	Input (Bayer, 06.04.2016)	NA	NA	637	NA	c1_51_14A2
c1_51_14A3	c1	FOREL	51	14	A	Switzerland	Eschikon field station	20.05.2016	2016	Input (Bayer, 06.04.2016)	NA	NA	637	NA	c1_51_14A3
c1_51_14B1	c1	FOREL	51	14	B	Switzerland	Eschikon field station	20.05.2016	2016	Input (Bayer, 06.04.2016)	NA	NA	61	NA	c1_51_14B1
c1_51_14B2	c1	FOREL	51	14	B	Switzerland	Eschikon field station	20.05.2016	2016	Input (Bayer, 06.04.2016)	NA	NA	62	YES	c1_51_14B2
c1_51_14B3	c1	FOREL	51	14	B	Switzerland	Eschikon field station	20.05.2016	2016	Input (Bayer, 06.04.2016)	NA	NA	44	YES	c1_51_14B3
c1_51_15A1	c1	FOREL	51	15	A	Switzerland	Eschikon field station	20.05.2016	2016	Input (Bayer, 06.04.2016)	NA	NA	1217	NA	c1_51_15A1
c1_51_15A2	c1	FOREL	51	15	A	Switzerland	Eschikon field station	20.05.2016	2016	Input (Bayer, 06.04.2016)	NA	NA	1155	NA	c1_51_15A2
c1_51_15A3	c1	FOREL	51	15	A	Switzerland	Eschikon field station	20.05.2016	2016	Input (Bayer, 06.04.2016)	NA	NA	1056	NA	c1_51_15A3
c1_51_15B1	c1	FOREL	51	15	B	Switzerland	Eschikon field station	20.05.2016	2016	Input (Bayer, 06.04.2016)	NA	NA	347	YES	c1_51_15B1
c1_51_15B2	c1	FOREL	51	15	B	Switzerland	Eschikon field station	20.05.2016	2016	Input (Bayer, 06.04.2016)	NA	NA	804	YES	c1_51_15B2
c1_51_15B3	c1	FOREL	51	15	B	Switzerland	Eschikon field station	20.05.2016	2016	Input (Bayer, 06.04.2016)	NA	NA	388	NA	c1_51_15B3
c1_51_1A1	c1	FOREL	51	1	A	Switzerland	Eschikon field station	20.05.2016	2016	Input (Bayer, 06.04.2016)	NA	NA	1351	YES	c1_51_1A1
c1_51_1A2	c1	FOREL	51	1	A	Switzerland	Eschikon field station	20.05.2016	2016	Input (Bayer, 06.04.2016)	NA	NA	1556	NA	c1_51_1A2
c1_51_2A1	c1	FOREL	51	2	A	Switzerland	Eschikon field station	20.05.2016	2016	Input (Bayer, 06.04.2016)	NA	NA	1346	NA	c1_51_2A1
c1_51_2A2	c1	FOREL	51	2	A	Switzerland	Eschikon field station	20.05.2016	2016	Input (Bayer, 06.04.2016)	NA	NA	1362	YES	c1_51_2A2
c1_51_2A3	c1	FOREL	51	2	A	Switzerland	Eschikon field station	20.05.2016	2016	Input (Bayer, 06.04.2016)	NA	NA	1370	NA	c1_51_2A3
c1_51_2B1	c1	FOREL	51	2	B	Switzerland	Eschikon field station	20.05.2016	2016	Input (Bayer, 06.04.2016)	NA	NA	1061	NA	c1_51_2B1
c1_51_2B2	c1	FOREL	51	2	B	Switzerland	Eschikon field station	20.05.2016	2016	Input (Bayer, 06.04.2016)	NA	NA	1183	NA	c1_51_2B2
c1_51_2B3	c1	FOREL	51	2	B	Switzerland	Eschikon field station	20.05.2016	2016	Input (Bayer, 06.04.2016)	NA	NA	835	YES	c1_51_2B3
c1_51_3A1	c1	FOREL	51	3	A	Switzerland	Eschikon field station	20.05.2016	2016	Input (Bayer, 06.04.2016)	NA	NA	189	YES	c1_51_3A1
c1_51_3A2	c1	FOREL	51	3	A	Switzerland	Eschikon field station	20.05.2016	2016	Input (Bayer, 06.04.2016)	NA	NA	224	NA	c1_51_3A2
c1_51_3A3	c1	FOREL	51	3	A	Switzerland	Eschikon field station	20.05.2016	2016	Input (Bayer, 06.04.2016)	NA	NA	224	NA	c1_51_3A3
c1_51_3B1	c1	FOREL	51	3	B	Switzerland	Eschikon field station	20.05.2016	2016	Input (Bayer, 06.04.2016)	NA	NA	159	YES	c1_51_3B1
c1_51_3B2	c1	FOREL	51	3	B	Switzerland	Eschikon field station	20.05.2016	2016	Input (Bayer, 06.04.2016)	NA	NA	194	NA	c1_51_3B2
c1_51_3B3	c1	FOREL	51	3	B	Switzerland	Eschikon field station	20.05.2016	2016	Input (Bayer, 06.04.2016)	NA	NA	186	NA	c1_51_3B3
c1_51_4A2	c1	FOREL	51	4	A	Switzerland	Eschikon field station	20.05.2016	2016	Input (Bayer, 06.04.2016)	NA	NA	1207	YES	c1_51_4A2
c1_51_4B1	c1	FOREL	51	4	B	Switzerland	Eschikon field station	20.05.2016	2016	Input (Bayer, 06.04.2016)	NA	NA	59	NA	c1_51_4B1
c1_51_4B2	c1	FOREL	51	4	B	Switzerland	Eschikon field station	20.05.2016	2016	Input (Bayer, 06.04.2016)	NA	NA	72	YES	c1_51_4B2
c1_51_4B3	c1	FOREL	51	4	B	Switzerland	Eschikon field station	20.05.2016	2016	Input (Bayer, 06.04.2016)	NA	NA	60	NA	c1_51_4B3
c1_51_5A1	c1	FOREL	51	5	A	Switzerland	Eschikon field station	20.05.2016	2016	Input (Bayer, 06.04.2016)	ST16CH_1E21	SRR10728843	1080	NA	c1_51_5A1
c1_51_5A2	c1	FOREL	51	5	A	Switzerland	Eschikon field station	20.05.2016	2016	Input (Bayer, 06.04.2016)	NA	NA	1227	NA	c1_51_5A2
c1_51_6A1	c1	FOREL	51	6	A	Switzerland	Eschikon field station	20.05.2016	2016	Input (Bayer, 06.04.2016)	NA	NA	194	NA	c1_51_6A1
c1_51_6A2	c1	FOREL	51	6	A	Switzerland	Eschikon field station	20.05.2016	2016	Input (Bayer, 06.04.2016)	NA	NA	193	NA	c1_51_6A2
c1_51_6A3	c1	FOREL	51	6	A	Switzerland	Eschikon field station	20.05.2016	2016	Input (Bayer, 06.04.2016)	NA	NA	192	YES	c1_51_6A3
c1_51_6B1	c1	FOREL	51	6	B	Switzerland	Eschikon field station	20.05.2016	2016	Input (Bayer, 06.04.2016)	NA	NA	1077	YES	c1_51_6B1
c1_51_6B2	c1	FOREL	51	6	B	Switzerland	Eschikon field station	20.05.2016	2016	Input (Bayer, 06.04.2016)	NA	NA	1031	NA	c1_51_6B2
c1_51_6B3	c1	FOREL	51	6	B	Switzerland	Eschikon field station	20.05.2016	2016	Input (Bayer, 06.04.2016)	NA	NA	1032	NA	c1_51_6B3
c1_51_7A1	c1	FOREL	51	7	A	Switzerland	Eschikon field station	20.05.2016	2016	Input (Bayer, 06.04.2016)	NA	NA	471	NA	c1_51_7A1
c1_51_7A2	c1	FOREL	51	7	A	Switzerland	Eschikon field station	20.05.2016	2016	Input (Bayer, 06.04.2016)	NA	NA	484	NA	c1_51_7A2
c1_51_7A3	c1	FOREL	51	7	A	Switzerland	Eschikon field station	20.05.2016	2016	Input (Bayer, 06.04.2016)	NA	NA	483	NA	c1_51_7A3
c1_51_7B1	c1	FOREL	51	7	B	Switzerland	Eschikon field station	20.05.2016	2016	Input (Bayer, 06.04.2016)	NA	NA	477	NA	c1_51_7B1
c1_51_7B2	c1	FOREL	51	7	B	Switzerland	Eschikon field station	20.05.2016	2016	Input (Bayer, 06.04.2016)	NA	NA	473	YES	c1_51_7B2
c1_51_7B3	c1	FOREL	51	7	B	Switzerland	Eschikon field station	20.05.2016	2016	Input (Bayer, 06.04.2016)	NA	NA	484	NA	c1_51_7B3
c1_51_8A1	c1	FOREL	51	8	A	Switzerland	Eschikon field station	20.05.2016	2016	Input (Bayer, 06.04.2016)	NA	NA	193	NA	c1_51_8A1
c1_51_8A2	c1	FOREL	51	8	A	Switzerland	Eschikon field station	20.05.2016	2016	Input (Bayer, 06.04.2016)	NA	NA	194	NA	c1_51_8A2
c1_51_8A3	c1	FOREL	51	8	A	Switzerland	Eschikon field station	20.05.2016	2016	Input (Bayer, 06.04.2016)	NA	NA	252	NA	c1_51_8A3
c1_51_8B1	c1	FOREL	51	8	B	Switzerland	Eschikon field station	20.05.2016	2016	Input (Bayer, 06.04.2016)	NA	NA	309	NA	c1_51_8B1
c1_51_8B2	c1	FOREL	51	8	B	Switzerland	Eschikon field station	20.05.2016	2016	Input (Bayer, 06.04.2016)	NA	NA	452	NA	c1_51_8B2
c1_51_8B3	c1	FOREL	51	8	B	Switzerland	Eschikon field station	20.05.2016	2016	Input (Bayer, 06.04.2016)	NA	NA	451	YES	c1_51_8B3
c1_51_9A1	c1	FOREL	51	9	A	Switzerland	Eschikon field station	20.05.2016	2016	Input (Bayer, 06.04.2016)	NA	NA	1550	YES	c1_51_9A1
c1_51_9A3	c1	FOREL	51	9	A	Switzerland	Eschikon field station	20.05.2016	2016	Input (Bayer, 06.04.2016)	NA	NA	1491	NA	c1_51_9A3
c1_51_9B1	c1	FOREL	51	9	B	Switzerland	Eschikon field station	20.05.2016	2016	Input (Bayer, 06.04.2016)	NA	NA	1481	YES	c1_51_9B1
c1_515_10A1	c1	RUNAL	515	10	A	Switzerland	Eschikon field station	20.05.2016	2016	Input (Bayer, 06.04.2016)	ST16CH_1Q48	SRR10728803	1000	NA	c1_515_10A1
c1_515_10A2	c1	RUNAL	515	10	A	Switzerland	Eschikon field station	20.05.2016	2016	Input (Bayer, 06.04.2016)	NA	NA	603	NA	c1_515_10A2
c1_515_10A3	c1	RUNAL	515	10	A	Switzerland	Eschikon field station	20.05.2016	2016	Input (Bayer, 06.04.2016)	NA	NA	586	YES	c1_515_10A3
c1_515_10B1	c1	RUNAL	515	10	B	Switzerland	Eschikon field station	20.05.2016	2016	Input (Bayer, 06.04.2016)	NA	NA	1446	YES	c1_515_10B1
c1_515_10B2	c1	RUNAL	515	10	B	Switzerland	Eschikon field station	20.05.2016	2016	Input (Bayer, 06.04.2016)	NA	NA	1528	NA	c1_515_10B2
c1_515_10B3	c1	RUNAL	515	10	B	Switzerland	Eschikon field station	20.05.2016	2016	Input (Bayer, 06.04.2016)	NA	NA	1528	NA	c1_515_10B3
c1_515_13B1	c1	RUNAL	515	13	B	Switzerland	Eschikon field station	20.05.2016	2016	Input (Bayer, 06.04.2016)	NA	NA	745	YES	c1_515_13B1
c1_515_3A1	c1	RUNAL	515	3	A	Switzerland	Eschikon field station	20.05.2016	2016	Input (Bayer, 06.04.2016)	ST16CH_1Q10	SRR10728805	602	NA	c1_515_3A1
c1_515_3A2	c1	RUNAL	515	3	A	Switzerland	Eschikon field station	20.05.2016	2016	Input (Bayer, 06.04.2016)	NA	NA	542	NA	c1_515_3A2
c1_515_3A3	c1	RUNAL	515	3	A	Switzerland	Eschikon field station	20.05.2016	2016	Input (Bayer, 06.04.2016)	NA	NA	542	NA	c1_515_3A3
c1_515_3B1	c1	RUNAL	515	3	B	Switzerland	Eschikon field station	20.05.2016	2016	Input (Bayer, 06.04.2016)	NA	NA	944	YES	c1_515_3B1
c1_515_3B3	c1	RUNAL	515	3	B	Switzerland	Eschikon field station	20.05.2016	2016	Input (Bayer, 06.04.2016)	NA	NA	958	YES	c1_515_3B3
c1_515_4A1	c1	RUNAL	515	4	A	Switzerland	Eschikon field station	20.05.2016	2016	Input (Bayer, 06.04.2016)	NA	NA	1360	NA	c1_515_4A1
c1_515_4A3	c1	RUNAL	515	4	A	Switzerland	Eschikon field station	20.05.2016	2016	Input (Bayer, 06.04.2016)	NA	NA	1356	YES	c1_515_4A3
c1_515_5B1	c1	RUNAL	515	5	B	Switzerland	Eschikon field station	20.05.2016	2016	Input (Bayer, 06.04.2016)	ST16CH_1Q24	SRR10728804	145	NA	c1_515_5B1
c1_515_5B2	c1	RUNAL	515	5	B	Switzerland	Eschikon field station	20.05.2016	2016	Input (Bayer, 06.04.2016)	NA	NA	160	NA	c1_515_5B2
c1_515_5B3	c1	RUNAL	515	5	B	Switzerland	Eschikon field station	20.05.2016	2016	Input (Bayer, 06.04.2016)	NA	NA	160	NA	c1_515_5B3
c1_515_6A1	c1	RUNAL	515	6	A	Switzerland	Eschikon field station	20.05.2016	2016	Input (Bayer, 06.04.2016)	NA	NA	459	YES	c1_515_6A1
c1_515_6A2	c1	RUNAL	515	6	A	Switzerland	Eschikon field station	20.05.2016	2016	Input (Bayer, 06.04.2016)	NA	NA	628	NA	c1_515_6A2
c1_515_6A3	c1	RUNAL	515	6	A	Switzerland	Eschikon field station	20.05.2016	2016	Input (Bayer, 06.04.2016)	NA	NA	591	NA	c1_515_6A3
c1_517_10A1	c1	CH COMBIN	517	10	A	Switzerland	Eschikon field station	20.05.2016	2016	Input (Bayer, 06.04.2016)	ST16CH_1R36	SRR10728799	838	NA	c1_517_10A1
c1_517_10A2	c1	CH COMBIN	517	10	A	Switzerland	Eschikon field station	20.05.2016	2016	Input (Bayer, 06.04.2016)	NA	NA	837	YES	c1_517_10A2
c1_517_2A1	c1	CH COMBIN	517	2	A	Switzerland	Eschikon field station	20.05.2016	2016	Input (Bayer, 06.04.2016)	ST16CH_1R5	SRR10728798	1018	YES	c1_517_2A1
c1_517_2A2	c1	CH COMBIN	517	2	A	Switzerland	Eschikon field station	20.05.2016	2016	Input (Bayer, 06.04.2016)	NA	NA	1018	NA	c1_517_2A2
c1_517_2A3	c1	CH COMBIN	517	2	A	Switzerland	Eschikon field station	20.05.2016	2016	Input (Bayer, 06.04.2016)	NA	NA	1018	NA	c1_517_2A3
c1_517_2B1	c1	CH COMBIN	517	2	B	Switzerland	Eschikon field station	20.05.2016	2016	Input (Bayer, 06.04.2016)	NA	NA	1500	NA	c1_517_2B1
c1_517_2B2	c1	CH COMBIN	517	2	B	Switzerland	Eschikon field station	20.05.2016	2016	Input (Bayer, 06.04.2016)	NA	NA	1428	YES	c1_517_2B2
c1_517_2H1	c1	CH COMBIN	517	2	H	Switzerland	Eschikon field station	20.05.2016	2016	Input (Bayer, 06.04.2016)	NA	NA	886	NA	c1_517_2H1
c1_517_3B1	c1	CH COMBIN	517	3	B	Switzerland	Eschikon field station	20.05.2016	2016	Input (Bayer, 06.04.2016)	NA	NA	733	NA	c1_517_3B1
c1_517_3B2	c1	CH COMBIN	517	3	B	Switzerland	Eschikon field station	20.05.2016	2016	Input (Bayer, 06.04.2016)	NA	NA	1018	NA	c1_517_3B2
c1_517_3B3	c1	CH COMBIN	517	3	B	Switzerland	Eschikon field station	20.05.2016	2016	Input (Bayer, 06.04.2016)	NA	NA	892	NA	c1_517_3B3
c1_517_5A3	c1	CH COMBIN	517	5	A	Switzerland	Eschikon field station	20.05.2016	2016	Input (Bayer, 06.04.2016)	ST16CH_1R24	SRR10728800	744	YES	c1_517_5A3
c1_517_6A1	c1	CH COMBIN	517	6	A	Switzerland	Eschikon field station	20.05.2016	2016	Input (Bayer, 06.04.2016)	NA	NA	733	NA	c1_517_6A1
c1_517_6A2	c1	CH COMBIN	517	6	A	Switzerland	Eschikon field station	20.05.2016	2016	Input (Bayer, 06.04.2016)	NA	NA	783	YES	c1_517_6A2
c1_541_10A1	c1	AUBUSSON	541	10	A	Switzerland	Eschikon field station	20.05.2016	2016	Input (Bayer, 06.04.2016)	NA	NA	1425	NA	c1_541_10A1
c1_541_10A2	c1	AUBUSSON	541	10	A	Switzerland	Eschikon field station	20.05.2016	2016	Input (Bayer, 06.04.2016)	NA	NA	1496	NA	c1_541_10A2
c1_541_10B2	c1	AUBUSSON	541	10	B	Switzerland	Eschikon field station	20.05.2016	2016	Input (Bayer, 06.04.2016)	NA	NA	1427	YES	c1_541_10B2
c1_541_10B3	c1	AUBUSSON	541	10	B	Switzerland	Eschikon field station	20.05.2016	2016	Input (Bayer, 06.04.2016)	NA	NA	1496	NA	c1_541_10B3
c1_541_11B1	c1	AUBUSSON	541	11	B	Switzerland	Eschikon field station	20.05.2016	2016	Input (Bayer, 06.04.2016)	NA	NA	391	YES	c1_541_11B1
c1_541_11B2	c1	AUBUSSON	541	11	B	Switzerland	Eschikon field station	20.05.2016	2016	Input (Bayer, 06.04.2016)	NA	NA	608	YES	c1_541_11B2
c1_541_11B3	c1	AUBUSSON	541	11	B	Switzerland	Eschikon field station	20.05.2016	2016	Input (Bayer, 06.04.2016)	NA	NA	440	YES	c1_541_11B3
c1_541_12B1	c1	AUBUSSON	541	12	B	Switzerland	Eschikon field station	20.05.2016	2016	Input (Bayer, 06.04.2016)	NA	NA	803	NA	c1_541_12B1
c1_541_14A2	c1	AUBUSSON	541	14	A	Switzerland	Eschikon field station	20.05.2016	2016	Input (Bayer, 06.04.2016)	NA	NA	940	YES	c1_541_14A2
c1_541_14B1	c1	AUBUSSON	541	14	B	Switzerland	Eschikon field station	20.05.2016	2016	Input (Bayer, 06.04.2016)	NA	NA	1212	NA	c1_541_14B1
c1_541_1A1	c1	AUBUSSON	541	1	A	Switzerland	Eschikon field station	20.05.2016	2016	Input (Bayer, 06.04.2016)	NA	NA	814	NA	c1_541_1A1
c1_541_1A2	c1	AUBUSSON	541	1	A	Switzerland	Eschikon field station	20.05.2016	2016	Input (Bayer, 06.04.2016)	NA	NA	1352	YES	c1_541_1A2
c1_541_2A1	c1	AUBUSSON	541	2	A	Switzerland	Eschikon field station	20.05.2016	2016	Input (Bayer, 06.04.2016)	NA	NA	813	YES	c1_541_2A1
c1_541_2B1	c1	AUBUSSON	541	2	B	Switzerland	Eschikon field station	20.05.2016	2016	Input (Bayer, 06.04.2016)	NA	NA	1405	YES	c1_541_2B1
c1_541_4B1	c1	AUBUSSON	541	4	B	Switzerland	Eschikon field station	20.05.2016	2016	Input (Bayer, 06.04.2016)	NA	NA	1367	NA	c1_541_4B1
c1_541_5A1	c1	AUBUSSON	541	5	A	Switzerland	Eschikon field station	20.05.2016	2016	Input (Bayer, 06.04.2016)	NA	NA	1212	NA	c1_541_5A1
c1_541_5B1	c1	AUBUSSON	541	5	B	Switzerland	Eschikon field station	20.05.2016	2016	Input (Bayer, 06.04.2016)	NA	NA	1084	YES	c1_541_5B1
c1_541_6A1	c1	AUBUSSON	541	6	A	Switzerland	Eschikon field station	20.05.2016	2016	Input (Bayer, 06.04.2016)	NA	NA	1526	YES	c1_541_6A1
c1_541_6A2	c1	AUBUSSON	541	6	A	Switzerland	Eschikon field station	20.05.2016	2016	Input (Bayer, 06.04.2016)	NA	NA	1486	YES	c1_541_6A2
c1_541_6B2	c1	AUBUSSON	541	6	B	Switzerland	Eschikon field station	20.05.2016	2016	Input (Bayer, 06.04.2016)	NA	NA	736	YES	c1_541_6B2
c1_541_8A1	c1	AUBUSSON	541	8	A	Switzerland	Eschikon field station	20.05.2016	2016	Input (Bayer, 06.04.2016)	NA	NA	757	YES	c1_541_8A1
c1_541_9A1	c1	AUBUSSON	541	9	A	Switzerland	Eschikon field station	20.05.2016	2016	Input (Bayer, 06.04.2016)	NA	NA	1023	YES	c1_541_9A1
c1_541_9B1	c1	AUBUSSON	541	9	B	Switzerland	Eschikon field station	20.05.2016	2016	Input (Bayer, 06.04.2016)	NA	NA	16	YES	c1_541_9B1
c1_571_14A1	c1	ZINAL	571	14	A	Switzerland	Eschikon field station	20.05.2016	2016	Input (Bayer, 06.04.2016)	ST16CH_1S33	SRR10728796	764	YES	c1_571_14A1
c1_571_7A1	c1	ZINAL	571	7	A	Switzerland	Eschikon field station	20.05.2016	2016	Input (Bayer, 06.04.2016)	ST16CH_1S7	SRR10728795	1536	NA	c1_571_7A1
c1_571_7B1	c1	ZINAL	571	7	B	Switzerland	Eschikon field station	20.05.2016	2016	Input (Bayer, 06.04.2016)	NA	NA	778	NA	c1_571_7B1
c1_571_7B2	c1	ZINAL	571	7	B	Switzerland	Eschikon field station	20.05.2016	2016	Input (Bayer, 06.04.2016)	ST16CH_1S9	SRR10728794	822	YES	c1_571_7B2
c1_571_7B3	c1	ZINAL	571	7	B	Switzerland	Eschikon field station	20.05.2016	2016	Input (Bayer, 06.04.2016)	ST16CH_1S10	SRR10728797	778	YES	c1_571_7B3
c1_580_2A1	c1	AROBASE	580	2	A	Switzerland	Eschikon field station	20.05.2016	2016	Input (Bayer, 06.04.2016)	NA	NA	116	NA	c1_580_2A1
c1_580_2A2	c1	AROBASE	580	2	A	Switzerland	Eschikon field station	20.05.2016	2016	Input (Bayer, 06.04.2016)	NA	NA	116	NA	c1_580_2A2
c1_580_2A3	c1	AROBASE	580	2	A	Switzerland	Eschikon field station	20.05.2016	2016	Input (Bayer, 06.04.2016)	NA	NA	105	YES	c1_580_2A3
c1_580_2B2	c1	AROBASE	580	2	B	Switzerland	Eschikon field station	20.05.2016	2016	Input (Bayer, 06.04.2016)	NA	NA	826	YES	c1_580_2B2
c1_580_3A1	c1	AROBASE	580	3	A	Switzerland	Eschikon field station	20.05.2016	2016	Input (Bayer, 06.04.2016)	NA	NA	1379	YES	c1_580_3A1
c1_580_3A2	c1	AROBASE	580	3	A	Switzerland	Eschikon field station	20.05.2016	2016	Input (Bayer, 06.04.2016)	NA	NA	1050	NA	c1_580_3A2
c1_580_3B1	c1	AROBASE	580	3	B	Switzerland	Eschikon field station	20.05.2016	2016	Input (Bayer, 06.04.2016)	NA	NA	1404	NA	c1_580_3B1
c1_580_5B1	c1	AROBASE	580	5	B	Switzerland	Eschikon field station	20.05.2016	2016	Input (Bayer, 06.04.2016)	NA	NA	859	YES	c1_580_5B1
c1_580_5B2	c1	AROBASE	580	5	B	Switzerland	Eschikon field station	20.05.2016	2016	Input (Bayer, 06.04.2016)	NA	NA	927	YES	c1_580_5B2
c1_580_5B3	c1	AROBASE	580	5	B	Switzerland	Eschikon field station	20.05.2016	2016	Input (Bayer, 06.04.2016)	NA	NA	1026	NA	c1_580_5B3
c1_580_6A1	c1	AROBASE	580	6	A	Switzerland	Eschikon field station	20.05.2016	2016	Input (Bayer, 06.04.2016)	NA	NA	848	YES	c1_580_6A1
c1_580_6A2	c1	AROBASE	580	6	A	Switzerland	Eschikon field station	20.05.2016	2016	Input (Bayer, 06.04.2016)	NA	NA	858	NA	c1_580_6A2
c1_580_6A3	c1	AROBASE	580	6	A	Switzerland	Eschikon field station	20.05.2016	2016	Input (Bayer, 06.04.2016)	NA	NA	858	NA	c1_580_6A3
c1_580_6B1	c1	AROBASE	580	6	B	Switzerland	Eschikon field station	20.05.2016	2016	Input (Bayer, 06.04.2016)	NA	NA	1431	YES	c1_580_6B1
c1_580_8A1	c1	AROBASE	580	8	A	Switzerland	Eschikon field station	20.05.2016	2016	Input (Bayer, 06.04.2016)	NA	NA	1026	NA	c1_580_8A1
c1_580_8A2	c1	AROBASE	580	8	A	Switzerland	Eschikon field station	20.05.2016	2016	Input (Bayer, 06.04.2016)	NA	NA	1026	NA	c1_580_8A2
c1_580_8A3	c1	AROBASE	580	8	A	Switzerland	Eschikon field station	20.05.2016	2016	Input (Bayer, 06.04.2016)	NA	NA	1050	NA	c1_580_8A3
c1_580_8B2	c1	AROBASE	580	8	B	Switzerland	Eschikon field station	20.05.2016	2016	Input (Bayer, 06.04.2016)	NA	NA	234	YES	c1_580_8B2
c1_580_8B3	c1	AROBASE	580	8	B	Switzerland	Eschikon field station	20.05.2016	2016	Input (Bayer, 06.04.2016)	NA	NA	229	YES	c1_580_8B3
c1_59_10B1	c1	AROBASE	59	10	B	Switzerland	Eschikon field station	20.05.2016	2016	Input (Bayer, 06.04.2016)	NA	NA	1392	YES	c1_59_10B1
c1_59_12A1	c1	AROBASE	59	12	A	Switzerland	Eschikon field station	20.05.2016	2016	Input (Bayer, 06.04.2016)	NA	NA	1441	YES	c1_59_12A1
c1_59_14A1	c1	AROBASE	59	14	A	Switzerland	Eschikon field station	20.05.2016	2016	Input (Bayer, 06.04.2016)	NA	NA	762	YES	c1_59_14A1
c1_59_14B1	c1	AROBASE	59	14	B	Switzerland	Eschikon field station	20.05.2016	2016	Input (Bayer, 06.04.2016)	NA	NA	1542	YES	c1_59_14B1
c1_59_15A1	c1	AROBASE	59	15	A	Switzerland	Eschikon field station	20.05.2016	2016	Input (Bayer, 06.04.2016)	NA	NA	1390	YES	c1_59_15A1
c1_59_15B1	c1	AROBASE	59	15	B	Switzerland	Eschikon field station	20.05.2016	2016	Input (Bayer, 06.04.2016)	NA	NA	1349	YES	c1_59_15B1
c1_59_16A1	c1	AROBASE	59	16	A	Switzerland	Eschikon field station	20.05.2016	2016	Input (Bayer, 06.04.2016)	NA	NA	776	NA	c1_59_16A1
c1_59_16A2	c1	AROBASE	59	16	A	Switzerland	Eschikon field station	20.05.2016	2016	Input (Bayer, 06.04.2016)	NA	NA	1312	NA	c1_59_16A2
c1_59_16A3	c1	AROBASE	59	16	A	Switzerland	Eschikon field station	20.05.2016	2016	Input (Bayer, 06.04.2016)	ST16CH_1X23	SRR10728775	732	YES	c1_59_16A3
c1_59_1A1	c1	AROBASE	59	1	A	Switzerland	Eschikon field station	20.05.2016	2016	Input (Bayer, 06.04.2016)	ST16CH_1X1	SRR10728777	726	NA	c1_59_1A1
c1_59_2A1	c1	AROBASE	59	2	A	Switzerland	Eschikon field station	20.05.2016	2016	Input (Bayer, 06.04.2016)	NA	NA	1322	NA	c1_59_2A1
c1_59_2A2	c1	AROBASE	59	2	A	Switzerland	Eschikon field station	20.05.2016	2016	Input (Bayer, 06.04.2016)	NA	NA	1308	NA	c1_59_2A2
c1_59_3A1	c1	AROBASE	59	3	A	Switzerland	Eschikon field station	20.05.2016	2016	Input (Bayer, 06.04.2016)	NA	NA	67	NA	c1_59_3A1
c1_59_3A2	c1	AROBASE	59	3	A	Switzerland	Eschikon field station	20.05.2016	2016	Input (Bayer, 06.04.2016)	NA	NA	67	NA	c1_59_3A2
c1_59_3B1	c1	AROBASE	59	3	B	Switzerland	Eschikon field station	20.05.2016	2016	Input (Bayer, 06.04.2016)	NA	NA	983	NA	c1_59_3B1
c1_59_4A1	c1	AROBASE	59	4	A	Switzerland	Eschikon field station	20.05.2016	2016	Input (Bayer, 06.04.2016)	ST16CH_1X7	SRR10728774	980	NA	c1_59_4A1
c1_59_5B1	c1	AROBASE	59	5	B	Switzerland	Eschikon field station	20.05.2016	2016	Input (Bayer, 06.04.2016)	NA	NA	902	YES	c1_59_5B1
c1_59_6A1	c1	AROBASE	59	6	A	Switzerland	Eschikon field station	20.05.2016	2016	Input (Bayer, 06.04.2016)	NA	NA	934	NA	c1_59_6A1
c1_59_6A2	c1	AROBASE	59	6	A	Switzerland	Eschikon field station	20.05.2016	2016	Input (Bayer, 06.04.2016)	NA	NA	196	YES	c1_59_6A2
c1_59_7A1	c1	AROBASE	59	7	A	Switzerland	Eschikon field station	20.05.2016	2016	Input (Bayer, 06.04.2016)	NA	NA	983	NA	c1_59_7A1
c1_59_7A2	c1	AROBASE	59	7	A	Switzerland	Eschikon field station	20.05.2016	2016	Input (Bayer, 06.04.2016)	NA	NA	1135	NA	c1_59_7A2
c1_59_8A1	c1	AROBASE	59	8	A	Switzerland	Eschikon field station	20.05.2016	2016	Input (Bayer, 06.04.2016)	NA	NA	1495	YES	c1_59_8A1
c1_59_8A2	c1	AROBASE	59	8	A	Switzerland	Eschikon field station	20.05.2016	2016	Input (Bayer, 06.04.2016)	ST16CH_1X14	SRR10728776	1188	NA	c1_59_8A2
c1_611_10A1	c1	LORENZO	611	10	A	Switzerland	Eschikon field station	20.05.2016	2016	Input (Bayer, 06.04.2016)	NA	NA	380	YES	c1_611_10A1
c1_611_10A2	c1	LORENZO	611	10	A	Switzerland	Eschikon field station	20.05.2016	2016	Input (Bayer, 06.04.2016)	NA	NA	378	NA	c1_611_10A2
c1_611_10A3	c1	LORENZO	611	10	A	Switzerland	Eschikon field station	20.05.2016	2016	Input (Bayer, 06.04.2016)	NA	NA	378	NA	c1_611_10A3
c1_611_10B1	c1	LORENZO	611	10	B	Switzerland	Eschikon field station	20.05.2016	2016	Input (Bayer, 06.04.2016)	NA	NA	203	NA	c1_611_10B1
c1_611_10B2	c1	LORENZO	611	10	B	Switzerland	Eschikon field station	20.05.2016	2016	Input (Bayer, 06.04.2016)	ST16CH_1T52	SRR10728790	166	NA	c1_611_10B2
c1_611_11B1	c1	LORENZO	611	11	B	Switzerland	Eschikon field station	20.05.2016	2016	Input (Bayer, 06.04.2016)	NA	NA	556	NA	c1_611_11B1
c1_611_11B3	c1	LORENZO	611	11	B	Switzerland	Eschikon field station	20.05.2016	2016	Input (Bayer, 06.04.2016)	NA	NA	754	YES	c1_611_11B3
c1_611_12B1	c1	LORENZO	611	12	B	Switzerland	Eschikon field station	20.05.2016	2016	Input (Bayer, 06.04.2016)	NA	NA	1245	YES	c1_611_12B1
c1_611_13B1	c1	LORENZO	611	13	B	Switzerland	Eschikon field station	20.05.2016	2016	Input (Bayer, 06.04.2016)	NA	NA	124	NA	c1_611_13B1
c1_611_13B2	c1	LORENZO	611	13	B	Switzerland	Eschikon field station	20.05.2016	2016	Input (Bayer, 06.04.2016)	NA	NA	108	YES	c1_611_13B2
c1_611_14B1	c1	LORENZO	611	14	B	Switzerland	Eschikon field station	20.05.2016	2016	Input (Bayer, 06.04.2016)	NA	NA	1374	YES	c1_611_14B1
c1_611_14B2	c1	LORENZO	611	14	B	Switzerland	Eschikon field station	20.05.2016	2016	Input (Bayer, 06.04.2016)	NA	NA	1348	NA	c1_611_14B2
c1_611_14B3	c1	LORENZO	611	14	B	Switzerland	Eschikon field station	20.05.2016	2016	Input (Bayer, 06.04.2016)	NA	NA	1373	NA	c1_611_14B3
c1_611_1A1	c1	LORENZO	611	1	A	Switzerland	Eschikon field station	20.05.2016	2016	Input (Bayer, 06.04.2016)	NA	NA	423	YES	c1_611_1A1
c1_611_1A2	c1	LORENZO	611	1	A	Switzerland	Eschikon field station	20.05.2016	2016	Input (Bayer, 06.04.2016)	ST16CH_1T2	SRR10728793	556	NA	c1_611_1A2
c1_611_2A1	c1	LORENZO	611	2	A	Switzerland	Eschikon field station	20.05.2016	2016	Input (Bayer, 06.04.2016)	NA	NA	552	NA	c1_611_2A1
c1_611_2A2	c1	LORENZO	611	2	A	Switzerland	Eschikon field station	20.05.2016	2016	Input (Bayer, 06.04.2016)	NA	NA	552	NA	c1_611_2A2
c1_611_2A3	c1	LORENZO	611	2	A	Switzerland	Eschikon field station	20.05.2016	2016	Input (Bayer, 06.04.2016)	NA	NA	413	YES	c1_611_2A3
c1_611_2B1	c1	LORENZO	611	2	B	Switzerland	Eschikon field station	20.05.2016	2016	Input (Bayer, 06.04.2016)	NA	NA	419	NA	c1_611_2B1
c1_611_2B2	c1	LORENZO	611	2	B	Switzerland	Eschikon field station	20.05.2016	2016	Input (Bayer, 06.04.2016)	NA	NA	206	NA	c1_611_2B2
c1_611_2B3	c1	LORENZO	611	2	B	Switzerland	Eschikon field station	20.05.2016	2016	Input (Bayer, 06.04.2016)	NA	NA	549	NA	c1_611_2B3
c1_611_3A1	c1	LORENZO	611	3	A	Switzerland	Eschikon field station	20.05.2016	2016	Input (Bayer, 06.04.2016)	NA	NA	394	YES	c1_611_3A1
c1_611_3A2	c1	LORENZO	611	3	A	Switzerland	Eschikon field station	20.05.2016	2016	Input (Bayer, 06.04.2016)	NA	NA	393	NA	c1_611_3A2
c1_611_3A3	c1	LORENZO	611	3	A	Switzerland	Eschikon field station	20.05.2016	2016	Input (Bayer, 06.04.2016)	NA	NA	392	NA	c1_611_3A3
c1_611_4A1	c1	LORENZO	611	4	A	Switzerland	Eschikon field station	20.05.2016	2016	Input (Bayer, 06.04.2016)	NA	NA	90	NA	c1_611_4A1
c1_611_4A2	c1	LORENZO	611	4	A	Switzerland	Eschikon field station	20.05.2016	2016	Input (Bayer, 06.04.2016)	NA	NA	99	NA	c1_611_4A2
c1_611_4A3	c1	LORENZO	611	4	A	Switzerland	Eschikon field station	20.05.2016	2016	Input (Bayer, 06.04.2016)	NA	NA	57	YES	c1_611_4A3
c1_611_6A1	c1	LORENZO	611	6	A	Switzerland	Eschikon field station	20.05.2016	2016	Input (Bayer, 06.04.2016)	ST16CH_1T25	SRR10728792	281	NA	c1_611_6A1
c1_611_6A2	c1	LORENZO	611	6	A	Switzerland	Eschikon field station	20.05.2016	2016	Input (Bayer, 06.04.2016)	NA	NA	271	NA	c1_611_6A2
c1_611_6A3	c1	LORENZO	611	6	A	Switzerland	Eschikon field station	20.05.2016	2016	Input (Bayer, 06.04.2016)	NA	NA	271	NA	c1_611_6A3
c1_611_6B1	c1	LORENZO	611	6	B	Switzerland	Eschikon field station	20.05.2016	2016	Input (Bayer, 06.04.2016)	NA	NA	58	YES	c1_611_6B1
c1_611_6B2	c1	LORENZO	611	6	B	Switzerland	Eschikon field station	20.05.2016	2016	Input (Bayer, 06.04.2016)	NA	NA	551	NA	c1_611_6B2
c1_611_6B3	c1	LORENZO	611	6	B	Switzerland	Eschikon field station	20.05.2016	2016	Input (Bayer, 06.04.2016)	NA	NA	564	NA	c1_611_6B3
c1_611_7A1	c1	LORENZO	611	7	A	Switzerland	Eschikon field station	20.05.2016	2016	Input (Bayer, 06.04.2016)	NA	NA	683	NA	c1_611_7A1
c1_611_7A2	c1	LORENZO	611	7	A	Switzerland	Eschikon field station	20.05.2016	2016	Input (Bayer, 06.04.2016)	NA	NA	711	YES	c1_611_7A2
c1_611_7A3	c1	LORENZO	611	7	A	Switzerland	Eschikon field station	20.05.2016	2016	Input (Bayer, 06.04.2016)	NA	NA	685	NA	c1_611_7A3
c1_611_7B1	c1	LORENZO	611	7	B	Switzerland	Eschikon field station	20.05.2016	2016	Input (Bayer, 06.04.2016)	NA	NA	1167	NA	c1_611_7B1
c1_611_7B2	c1	LORENZO	611	7	B	Switzerland	Eschikon field station	20.05.2016	2016	Input (Bayer, 06.04.2016)	NA	NA	1125	NA	c1_611_7B2
c1_611_7B3	c1	LORENZO	611	7	B	Switzerland	Eschikon field station	20.05.2016	2016	Input (Bayer, 06.04.2016)	NA	NA	964	YES	c1_611_7B3
c1_611_8A1	c1	LORENZO	611	8	A	Switzerland	Eschikon field station	20.05.2016	2016	Input (Bayer, 06.04.2016)	NA	NA	659	NA	c1_611_8A1
c1_611_8A2	c1	LORENZO	611	8	A	Switzerland	Eschikon field station	20.05.2016	2016	Input (Bayer, 06.04.2016)	NA	NA	667	YES	c1_611_8A2
c1_611_8A3	c1	LORENZO	611	8	A	Switzerland	Eschikon field station	20.05.2016	2016	Input (Bayer, 06.04.2016)	NA	NA	666	YES	c1_611_8A3
c1_611_8B1	c1	LORENZO	611	8	B	Switzerland	Eschikon field station	20.05.2016	2016	Input (Bayer, 06.04.2016)	NA	NA	1246	YES	c1_611_8B1
c1_611_9A2	c1	LORENZO	611	9	A	Switzerland	Eschikon field station	20.05.2016	2016	Input (Bayer, 06.04.2016)	NA	NA	820	YES	c1_611_9A2
c1_611_9B1	c1	LORENZO	611	9	B	Switzerland	Eschikon field station	20.05.2016	2016	Input (Bayer, 06.04.2016)	NA	NA	1171	NA	c1_611_9B1
c1_611_9B2	c1	LORENZO	611	9	B	Switzerland	Eschikon field station	20.05.2016	2016	Input (Bayer, 06.04.2016)	NA	NA	1116	NA	c1_611_9B2
c1_611_9B3	c1	LORENZO	611	9	B	Switzerland	Eschikon field station	20.05.2016	2016	Input (Bayer, 06.04.2016)	NA	NA	1432	YES	c1_611_9B3
c1_616_1S1	c1	GARCIA	616	1	S	Switzerland	Eschikon field station	20.05.2016	2016	Input (Bayer, 06.04.2016)	NA	NA	1141	NA	c1_616_1S1
c1_616_4T1	c1	GARCIA	616	4	T	Switzerland	Eschikon field station	20.05.2016	2016	Input (Bayer, 06.04.2016)	NA	NA	1504	NA	c1_616_4T1
c1_631_10H1	c1	HALDOR	631	10	H	Switzerland	Eschikon field station	20.05.2016	2016	Input (Bayer, 06.04.2016)	NA	NA	530	NA	c1_631_10H1
c1_631_2H1	c1	HALDOR	631	2	H	Switzerland	Eschikon field station	20.05.2016	2016	Input (Bayer, 06.04.2016)	NA	NA	718	NA	c1_631_2H1
c1_631_3J1	c1	HALDOR	631	3	J	Switzerland	Eschikon field station	20.05.2016	2016	Input (Bayer, 06.04.2016)	NA	NA	651	NA	c1_631_3J1
c1_631_7K1	c1	HALDOR	631	7	K	Switzerland	Eschikon field station	20.05.2016	2016	Input (Bayer, 06.04.2016)	NA	NA	930	NA	c1_631_7K1
c1_631_7K2	c1	HALDOR	631	7	K	Switzerland	Eschikon field station	20.05.2016	2016	Input (Bayer, 06.04.2016)	NA	NA	977	NA	c1_631_7K2
c1_631_8H1	c1	HALDOR	631	8	H	Switzerland	Eschikon field station	20.05.2016	2016	Input (Bayer, 06.04.2016)	NA	NA	570	NA	c1_631_8H1
c1_631_8H2	c1	HALDOR	631	8	H	Switzerland	Eschikon field station	20.05.2016	2016	Input (Bayer, 06.04.2016)	NA	NA	535	NA	c1_631_8H2
c1_631_9H1	c1	HALDOR	631	9	H	Switzerland	Eschikon field station	20.05.2016	2016	Input (Bayer, 06.04.2016)	NA	NA	602	NA	c1_631_9H1
c1_640_10A1	c1	CH CLARO	640	10	A	Switzerland	Eschikon field station	20.05.2016	2016	Input (Bayer, 06.04.2016)	NA	NA	587	NA	c1_640_10A1
c1_640_10A2	c1	CH CLARO	640	10	A	Switzerland	Eschikon field station	20.05.2016	2016	Input (Bayer, 06.04.2016)	NA	NA	605	NA	c1_640_10A2
c1_640_10A3	c1	CH CLARO	640	10	A	Switzerland	Eschikon field station	20.05.2016	2016	Input (Bayer, 06.04.2016)	NA	NA	453	YES	c1_640_10A3
c1_640_10B3	c1	CH CLARO	640	10	B	Switzerland	Eschikon field station	20.05.2016	2016	Input (Bayer, 06.04.2016)	NA	NA	1223	NA	c1_640_10B3
c1_640_11A1	c1	CH CLARO	640	11	A	Switzerland	Eschikon field station	20.05.2016	2016	Input (Bayer, 06.04.2016)	NA	NA	1264	NA	c1_640_11A1
c1_640_11A2	c1	CH CLARO	640	11	A	Switzerland	Eschikon field station	20.05.2016	2016	Input (Bayer, 06.04.2016)	NA	NA	1328	NA	c1_640_11A2
c1_640_11A3	c1	CH CLARO	640	11	A	Switzerland	Eschikon field station	20.05.2016	2016	Input (Bayer, 06.04.2016)	NA	NA	706	NA	c1_640_11A3
c1_640_11B1	c1	CH CLARO	640	11	B	Switzerland	Eschikon field station	20.05.2016	2016	Input (Bayer, 06.04.2016)	NA	NA	1064	NA	c1_640_11B1
c1_640_11B3	c1	CH CLARO	640	11	B	Switzerland	Eschikon field station	20.05.2016	2016	Input (Bayer, 06.04.2016)	ST16CH_1U30	SRR10728788	1079	NA	c1_640_11B3
c1_640_13B1	c1	CH CLARO	640	13	B	Switzerland	Eschikon field station	20.05.2016	2016	Input (Bayer, 06.04.2016)	NA	NA	948	NA	c1_640_13B1
c1_640_13B2	c1	CH CLARO	640	13	B	Switzerland	Eschikon field station	20.05.2016	2016	Input (Bayer, 06.04.2016)	NA	NA	948	NA	c1_640_13B2
c1_640_13B3	c1	CH CLARO	640	13	B	Switzerland	Eschikon field station	20.05.2016	2016	Input (Bayer, 06.04.2016)	NA	NA	998	NA	c1_640_13B3
c1_640_14A2	c1	CH CLARO	640	14	A	Switzerland	Eschikon field station	20.05.2016	2016	Input (Bayer, 06.04.2016)	NA	NA	1408	YES	c1_640_14A2
c1_640_14A3	c1	CH CLARO	640	14	A	Switzerland	Eschikon field station	20.05.2016	2016	Input (Bayer, 06.04.2016)	NA	NA	1458	NA	c1_640_14A3
c1_640_14B1	c1	CH CLARO	640	14	B	Switzerland	Eschikon field station	20.05.2016	2016	Input (Bayer, 06.04.2016)	NA	NA	975	NA	c1_640_14B1
c1_640_14B2	c1	CH CLARO	640	14	B	Switzerland	Eschikon field station	20.05.2016	2016	Input (Bayer, 06.04.2016)	NA	NA	986	YES	c1_640_14B2
c1_640_1A1	c1	CH CLARO	640	1	A	Switzerland	Eschikon field station	20.05.2016	2016	Input (Bayer, 06.04.2016)	ST16CH_1U1	SRR10728789	293	NA	c1_640_1A1
c1_640_1A2	c1	CH CLARO	640	1	A	Switzerland	Eschikon field station	20.05.2016	2016	Input (Bayer, 06.04.2016)	NA	NA	289	NA	c1_640_1A2
c1_640_1A3	c1	CH CLARO	640	1	A	Switzerland	Eschikon field station	20.05.2016	2016	Input (Bayer, 06.04.2016)	NA	NA	293	NA	c1_640_1A3
c1_640_1B1	c1	CH CLARO	640	1	B	Switzerland	Eschikon field station	20.05.2016	2016	Input (Bayer, 06.04.2016)	NA	NA	232	NA	c1_640_1B1
c1_640_1B2	c1	CH CLARO	640	1	B	Switzerland	Eschikon field station	20.05.2016	2016	Input (Bayer, 06.04.2016)	NA	NA	1060	NA	c1_640_1B2
c1_640_1B3	c1	CH CLARO	640	1	B	Switzerland	Eschikon field station	20.05.2016	2016	Input (Bayer, 06.04.2016)	ST16CH_1U6	SRR10728787	144	YES	c1_640_1B3
c1_640_3A1	c1	CH CLARO	640	3	A	Switzerland	Eschikon field station	20.05.2016	2016	Input (Bayer, 06.04.2016)	NA	NA	1525	NA	c1_640_3A1
c1_640_7A3	c1	CH CLARO	640	7	A	Switzerland	Eschikon field station	20.05.2016	2016	Input (Bayer, 06.04.2016)	ST16CH_1U9	SRR10728786	138	NA	c1_640_7A3
c1_640_7B1	c1	CH CLARO	640	7	B	Switzerland	Eschikon field station	20.05.2016	2016	Input (Bayer, 06.04.2016)	NA	NA	1087	NA	c1_640_7B1
c1_640_7B2	c1	CH CLARO	640	7	B	Switzerland	Eschikon field station	20.05.2016	2016	Input (Bayer, 06.04.2016)	NA	NA	1064	NA	c1_640_7B2
c1_640_7B3	c1	CH CLARO	640	7	B	Switzerland	Eschikon field station	20.05.2016	2016	Input (Bayer, 06.04.2016)	NA	NA	1058	NA	c1_640_7B3
c1_640_8A2	c1	CH CLARO	640	8	A	Switzerland	Eschikon field station	20.05.2016	2016	Input (Bayer, 06.04.2016)	NA	NA	494	NA	c1_640_8A2
c1_640_8A3	c1	CH CLARO	640	8	A	Switzerland	Eschikon field station	20.05.2016	2016	Input (Bayer, 06.04.2016)	NA	NA	377	NA	c1_640_8A3
c1_640_9A1	c1	CH CLARO	640	9	A	Switzerland	Eschikon field station	20.05.2016	2016	Input (Bayer, 06.04.2016)	NA	NA	48	NA	c1_640_9A1
c1_640_9A2	c1	CH CLARO	640	9	A	Switzerland	Eschikon field station	20.05.2016	2016	Input (Bayer, 06.04.2016)	NA	NA	343	YES	c1_640_9A2
c1_640_9B1	c1	CH CLARO	640	9	B	Switzerland	Eschikon field station	20.05.2016	2016	Input (Bayer, 06.04.2016)	NA	NA	373	NA	c1_640_9B1
c1_640_9B2	c1	CH CLARO	640	9	B	Switzerland	Eschikon field station	20.05.2016	2016	Input (Bayer, 06.04.2016)	NA	NA	367	NA	c1_640_9B2
c1_645_10H1	c1	MARCHEVAL	645	10	H	Switzerland	Eschikon field station	20.05.2016	2016	Input (Bayer, 06.04.2016)	NA	NA	434	NA	c1_645_10H1
c1_645_10H2	c1	MARCHEVAL	645	10	H	Switzerland	Eschikon field station	20.05.2016	2016	Input (Bayer, 06.04.2016)	NA	NA	559	NA	c1_645_10H2
c1_645_14H1	c1	MARCHEVAL	645	14	H	Switzerland	Eschikon field station	20.05.2016	2016	Input (Bayer, 06.04.2016)	NA	NA	550	NA	c1_645_14H1
c1_645_1H1	c1	MARCHEVAL	645	1	H	Switzerland	Eschikon field station	20.05.2016	2016	Input (Bayer, 06.04.2016)	NA	NA	694	NA	c1_645_1H1
c1_645_6J1	c1	MARCHEVAL	645	6	J	Switzerland	Eschikon field station	20.05.2016	2016	Input (Bayer, 06.04.2016)	NA	NA	697	NA	c1_645_6J1
c1_645_7H1	c1	MARCHEVAL	645	7	H	Switzerland	Eschikon field station	20.05.2016	2016	Input (Bayer, 06.04.2016)	NA	NA	313	NA	c1_645_7H1
c1_645_7H2	c1	MARCHEVAL	645	7	H	Switzerland	Eschikon field station	20.05.2016	2016	Input (Bayer, 06.04.2016)	NA	NA	313	NA	c1_645_7H2
c1_645_9H1	c1	MARCHEVAL	645	9	H	Switzerland	Eschikon field station	20.05.2016	2016	Input (Bayer, 06.04.2016)	NA	NA	443	NA	c1_645_9H1
c1_708_15H1	c1	CASSIOPEIA	708	15	H	Switzerland	Eschikon field station	20.05.2016	2016	Input (Bayer, 06.04.2016)	NA	NA	1156	NA	c1_708_15H1
c1_708_15J1	c1	CASSIOPEIA	708	15	J	Switzerland	Eschikon field station	20.05.2016	2016	Input (Bayer, 06.04.2016)	NA	NA	567	NA	c1_708_15J1
c1_708_1H1	c1	CASSIOPEIA	708	1	H	Switzerland	Eschikon field station	20.05.2016	2016	Input (Bayer, 06.04.2016)	NA	NA	312	NA	c1_708_1H1
c1_708_1H2	c1	CASSIOPEIA	708	1	H	Switzerland	Eschikon field station	20.05.2016	2016	Input (Bayer, 06.04.2016)	NA	NA	312	NA	c1_708_1H2
c1_708_1K1	c1	CASSIOPEIA	708	1	K	Switzerland	Eschikon field station	20.05.2016	2016	Input (Bayer, 06.04.2016)	NA	NA	307	NA	c1_708_1K1
c1_708_1K2	c1	CASSIOPEIA	708	1	K	Switzerland	Eschikon field station	20.05.2016	2016	Input (Bayer, 06.04.2016)	NA	NA	312	NA	c1_708_1K2
c1_708_1K3	c1	CASSIOPEIA	708	1	K	Switzerland	Eschikon field station	20.05.2016	2016	Input (Bayer, 06.04.2016)	NA	NA	312	NA	c1_708_1K3
c1_708_4H1	c1	CASSIOPEIA	708	4	H	Switzerland	Eschikon field station	20.05.2016	2016	Input (Bayer, 06.04.2016)	NA	NA	557	NA	c1_708_4H1
c1_708_4H2	c1	CASSIOPEIA	708	4	H	Switzerland	Eschikon field station	20.05.2016	2016	Input (Bayer, 06.04.2016)	NA	NA	557	NA	c1_708_4H2
c1_708_4H3	c1	CASSIOPEIA	708	4	H	Switzerland	Eschikon field station	20.05.2016	2016	Input (Bayer, 06.04.2016)	NA	NA	543	NA	c1_708_4H3
c1_708_5H1	c1	CASSIOPEIA	708	5	H	Switzerland	Eschikon field station	20.05.2016	2016	Input (Bayer, 06.04.2016)	NA	NA	649	NA	c1_708_5H1
c1_708_5H2	c1	CASSIOPEIA	708	5	H	Switzerland	Eschikon field station	20.05.2016	2016	Input (Bayer, 06.04.2016)	NA	NA	575	NA	c1_708_5H2
c1_708_5H3	c1	CASSIOPEIA	708	5	H	Switzerland	Eschikon field station	20.05.2016	2016	Input (Bayer, 06.04.2016)	NA	NA	498	NA	c1_708_5H3
c1_708_7H1	c1	CASSIOPEIA	708	7	H	Switzerland	Eschikon field station	20.05.2016	2016	Input (Bayer, 06.04.2016)	NA	NA	1177	NA	c1_708_7H1
c1_708_8J1	c1	CASSIOPEIA	708	8	J	Switzerland	Eschikon field station	20.05.2016	2016	Input (Bayer, 06.04.2016)	NA	NA	270	NA	c1_708_8J1
c1_708_8J2	c1	CASSIOPEIA	708	8	J	Switzerland	Eschikon field station	20.05.2016	2016	Input (Bayer, 06.04.2016)	NA	NA	272	NA	c1_708_8J2
c1_708_9H1	c1	CASSIOPEIA	708	9	H	Switzerland	Eschikon field station	20.05.2016	2016	Input (Bayer, 06.04.2016)	NA	NA	775	NA	c1_708_9H1
c1_708_9H2	c1	CASSIOPEIA	708	9	H	Switzerland	Eschikon field station	20.05.2016	2016	Input (Bayer, 06.04.2016)	NA	NA	1580	NA	c1_708_9H2
c1_708_9J1	c1	CASSIOPEIA	708	9	J	Switzerland	Eschikon field station	20.05.2016	2016	Input (Bayer, 06.04.2016)	NA	NA	568	NA	c1_708_9J1
c1_709_11A1	c1	SIMANO	709	11	A	Switzerland	Eschikon field station	20.05.2016	2016	Input (Bayer, 06.04.2016)	NA	NA	1274	NA	c1_709_11A1
c1_709_11A3	c1	SIMANO	709	11	A	Switzerland	Eschikon field station	20.05.2016	2016	Input (Bayer, 06.04.2016)	NA	NA	1240	NA	c1_709_11A3
c1_709_11B1	c1	SIMANO	709	11	B	Switzerland	Eschikon field station	20.05.2016	2016	Input (Bayer, 06.04.2016)	NA	NA	1214	YES	c1_709_11B1
c1_709_11B2	c1	SIMANO	709	11	B	Switzerland	Eschikon field station	20.05.2016	2016	Input (Bayer, 06.04.2016)	NA	NA	112	NA	c1_709_11B2
c1_709_13A2	c1	SIMANO	709	13	A	Switzerland	Eschikon field station	20.05.2016	2016	Input (Bayer, 06.04.2016)	NA	NA	356	YES	c1_709_13A2
c1_709_13A3	c1	SIMANO	709	13	A	Switzerland	Eschikon field station	20.05.2016	2016	Input (Bayer, 06.04.2016)	NA	NA	674	YES	c1_709_13A3
c1_709_13B1	c1	SIMANO	709	13	B	Switzerland	Eschikon field station	20.05.2016	2016	Input (Bayer, 06.04.2016)	NA	NA	355	YES	c1_709_13B1
c1_709_13B2	c1	SIMANO	709	13	B	Switzerland	Eschikon field station	20.05.2016	2016	Input (Bayer, 06.04.2016)	NA	NA	115	NA	c1_709_13B2
c1_709_14A1	c1	SIMANO	709	14	A	Switzerland	Eschikon field station	20.05.2016	2016	Input (Bayer, 06.04.2016)	ST16CH_1V50	SRR10728782	115	NA	c1_709_14A1
c1_709_14B1	c1	SIMANO	709	14	B	Switzerland	Eschikon field station	20.05.2016	2016	Input (Bayer, 06.04.2016)	NA	NA	406	YES	c1_709_14B1
c1_709_14B2	c1	SIMANO	709	14	B	Switzerland	Eschikon field station	20.05.2016	2016	Input (Bayer, 06.04.2016)	NA	NA	494	NA	c1_709_14B2
c1_709_15A1	c1	SIMANO	709	15	A	Switzerland	Eschikon field station	20.05.2016	2016	Input (Bayer, 06.04.2016)	NA	NA	1132	YES	c1_709_15A1
c1_709_15A2	c1	SIMANO	709	15	A	Switzerland	Eschikon field station	20.05.2016	2016	Input (Bayer, 06.04.2016)	NA	NA	23	YES	c1_709_15A2
c1_709_15B1	c1	SIMANO	709	15	B	Switzerland	Eschikon field station	20.05.2016	2016	Input (Bayer, 06.04.2016)	NA	NA	9	YES	c1_709_15B1
c1_709_3A1	c1	SIMANO	709	3	A	Switzerland	Eschikon field station	20.05.2016	2016	Input (Bayer, 06.04.2016)	NA	NA	1332	YES	c1_709_3A1
c1_709_3A2	c1	SIMANO	709	3	A	Switzerland	Eschikon field station	20.05.2016	2016	Input (Bayer, 06.04.2016)	ST16CH_1V4	SRR10728783	336	NA	c1_709_3A2
c1_709_4A1	c1	SIMANO	709	4	A	Switzerland	Eschikon field station	20.05.2016	2016	Input (Bayer, 06.04.2016)	NA	NA	1523	NA	c1_709_4A1
c1_709_4A2	c1	SIMANO	709	4	A	Switzerland	Eschikon field station	20.05.2016	2016	Input (Bayer, 06.04.2016)	NA	NA	1523	NA	c1_709_4A2
c1_709_4A3	c1	SIMANO	709	4	A	Switzerland	Eschikon field station	20.05.2016	2016	Input (Bayer, 06.04.2016)	NA	NA	1468	YES	c1_709_4A3
c1_709_4B1	c1	SIMANO	709	4	B	Switzerland	Eschikon field station	20.05.2016	2016	Input (Bayer, 06.04.2016)	NA	NA	288	YES	c1_709_4B1
c1_709_4B2	c1	SIMANO	709	4	B	Switzerland	Eschikon field station	20.05.2016	2016	Input (Bayer, 06.04.2016)	NA	NA	1574	NA	c1_709_4B2
c1_709_5A2	c1	SIMANO	709	5	A	Switzerland	Eschikon field station	20.05.2016	2016	Input (Bayer, 06.04.2016)	ST16CH_1V12	SRR10728785	1326	NA	c1_709_5A2
c1_709_5A3	c1	SIMANO	709	5	A	Switzerland	Eschikon field station	20.05.2016	2016	Input (Bayer, 06.04.2016)	NA	NA	1325	YES	c1_709_5A3
c1_709_5B1	c1	SIMANO	709	5	B	Switzerland	Eschikon field station	20.05.2016	2016	Input (Bayer, 06.04.2016)	NA	NA	643	YES	c1_709_5B1
c1_709_5B2	c1	SIMANO	709	5	B	Switzerland	Eschikon field station	20.05.2016	2016	Input (Bayer, 06.04.2016)	NA	NA	600	NA	c1_709_5B2
c1_709_5B3	c1	SIMANO	709	5	B	Switzerland	Eschikon field station	20.05.2016	2016	Input (Bayer, 06.04.2016)	NA	NA	600	NA	c1_709_5B3
c1_709_6A1	c1	SIMANO	709	6	A	Switzerland	Eschikon field station	20.05.2016	2016	Input (Bayer, 06.04.2016)	NA	NA	573	YES	c1_709_6A1
c1_709_6A2	c1	SIMANO	709	6	A	Switzerland	Eschikon field station	20.05.2016	2016	Input (Bayer, 06.04.2016)	NA	NA	499	NA	c1_709_6A2
c1_709_6A3	c1	SIMANO	709	6	A	Switzerland	Eschikon field station	20.05.2016	2016	Input (Bayer, 06.04.2016)	NA	NA	104	YES	c1_709_6A3
c1_709_6B1	c1	SIMANO	709	6	B	Switzerland	Eschikon field station	20.05.2016	2016	Input (Bayer, 06.04.2016)	ST16CH_1V20	SRR10728784	664	NA	c1_709_6B1
c1_709_6B2	c1	SIMANO	709	6	B	Switzerland	Eschikon field station	20.05.2016	2016	Input (Bayer, 06.04.2016)	NA	NA	676	NA	c1_709_6B2
c1_709_6B3	c1	SIMANO	709	6	B	Switzerland	Eschikon field station	20.05.2016	2016	Input (Bayer, 06.04.2016)	NA	NA	677	NA	c1_709_6B3
c1_709_9A1	c1	SIMANO	709	9	A	Switzerland	Eschikon field station	20.05.2016	2016	Input (Bayer, 06.04.2016)	NA	NA	501	NA	c1_709_9A1
c1_709_9A2	c1	SIMANO	709	9	A	Switzerland	Eschikon field station	20.05.2016	2016	Input (Bayer, 06.04.2016)	NA	NA	617	YES	c1_709_9A2
c1_709_9B1	c1	SIMANO	709	9	B	Switzerland	Eschikon field station	20.05.2016	2016	Input (Bayer, 06.04.2016)	NA	NA	833	YES	c1_709_9B1
c1_709_9B2	c1	SIMANO	709	9	B	Switzerland	Eschikon field station	20.05.2016	2016	Input (Bayer, 06.04.2016)	NA	NA	500	NA	c1_709_9B2
c1_724_12A2	c1	TITLIS	724	12	A	Switzerland	Eschikon field station	20.05.2016	2016	Input (Bayer, 06.04.2016)	NA	NA	913	YES	c1_724_12A2
c1_724_12B1	c1	TITLIS	724	12	B	Switzerland	Eschikon field station	20.05.2016	2016	Input (Bayer, 06.04.2016)	NA	NA	905	YES	c1_724_12B1
c1_724_13A1	c1	TITLIS	724	13	A	Switzerland	Eschikon field station	20.05.2016	2016	Input (Bayer, 06.04.2016)	NA	NA	910	YES	c1_724_13A1
c1_724_13A2	c1	TITLIS	724	13	A	Switzerland	Eschikon field station	20.05.2016	2016	Input (Bayer, 06.04.2016)	NA	NA	1117	NA	c1_724_13A2
c1_724_13A3	c1	TITLIS	724	13	A	Switzerland	Eschikon field station	20.05.2016	2016	Input (Bayer, 06.04.2016)	NA	NA	1117	NA	c1_724_13A3
c1_724_14B1	c1	TITLIS	724	14	B	Switzerland	Eschikon field station	20.05.2016	2016	Input (Bayer, 06.04.2016)	NA	NA	1200	NA	c1_724_14B1
c1_724_14B2	c1	TITLIS	724	14	B	Switzerland	Eschikon field station	20.05.2016	2016	Input (Bayer, 06.04.2016)	NA	NA	244	YES	c1_724_14B2
c1_724_15A1	c1	TITLIS	724	15	A	Switzerland	Eschikon field station	20.05.2016	2016	Input (Bayer, 06.04.2016)	NA	NA	696	NA	c1_724_15A1
c1_724_15A2	c1	TITLIS	724	15	A	Switzerland	Eschikon field station	20.05.2016	2016	Input (Bayer, 06.04.2016)	NA	NA	556	NA	c1_724_15A2
c1_724_15A3	c1	TITLIS	724	15	A	Switzerland	Eschikon field station	20.05.2016	2016	Input (Bayer, 06.04.2016)	NA	NA	668	YES	c1_724_15A3
c1_724_1A1	c1	TITLIS	724	1	A	Switzerland	Eschikon field station	20.05.2016	2016	Input (Bayer, 06.04.2016)	NA	NA	773	YES	c1_724_1A1
c1_724_1B1	c1	TITLIS	724	1	B	Switzerland	Eschikon field station	20.05.2016	2016	Input (Bayer, 06.04.2016)	NA	NA	720	YES	c1_724_1B1
c1_724_2A1	c1	TITLIS	724	2	A	Switzerland	Eschikon field station	20.05.2016	2016	Input (Bayer, 06.04.2016)	NA	NA	546	NA	c1_724_2A1
c1_724_2A2	c1	TITLIS	724	2	A	Switzerland	Eschikon field station	20.05.2016	2016	Input (Bayer, 06.04.2016)	NA	NA	546	NA	c1_724_2A2
c1_724_2A3	c1	TITLIS	724	2	A	Switzerland	Eschikon field station	20.05.2016	2016	Input (Bayer, 06.04.2016)	NA	NA	546	NA	c1_724_2A3
c1_724_2B2	c1	TITLIS	724	2	B	Switzerland	Eschikon field station	20.05.2016	2016	Input (Bayer, 06.04.2016)	NA	NA	374	YES	c1_724_2B2
c1_724_2B3	c1	TITLIS	724	2	B	Switzerland	Eschikon field station	20.05.2016	2016	Input (Bayer, 06.04.2016)	NA	NA	376	NA	c1_724_2B3
c1_724_4A1	c1	TITLIS	724	4	A	Switzerland	Eschikon field station	20.05.2016	2016	Input (Bayer, 06.04.2016)	ST16CH_1W9	SRR10728778	765	NA	c1_724_4A1
c1_724_5B1	c1	TITLIS	724	5	B	Switzerland	Eschikon field station	20.05.2016	2016	Input (Bayer, 06.04.2016)	NA	NA	264	YES	c1_724_5B1
c1_724_7A1	c1	TITLIS	724	7	A	Switzerland	Eschikon field station	20.05.2016	2016	Input (Bayer, 06.04.2016)	NA	NA	547	NA	c1_724_7A1
c1_724_7A2	c1	TITLIS	724	7	A	Switzerland	Eschikon field station	20.05.2016	2016	Input (Bayer, 06.04.2016)	NA	NA	946	YES	c1_724_7A2
c1_724_7A3	c1	TITLIS	724	7	A	Switzerland	Eschikon field station	20.05.2016	2016	Input (Bayer, 06.04.2016)	NA	NA	547	NA	c1_724_7A3
c1_724_7B1	c1	TITLIS	724	7	B	Switzerland	Eschikon field station	20.05.2016	2016	Input (Bayer, 06.04.2016)	NA	NA	1121	NA	c1_724_7B1
c1_724_7B2	c1	TITLIS	724	7	B	Switzerland	Eschikon field station	20.05.2016	2016	Input (Bayer, 06.04.2016)	ST16CH_1W18	SRR10728781	922	NA	c1_724_7B2
c1_724_7B3	c1	TITLIS	724	7	B	Switzerland	Eschikon field station	20.05.2016	2016	Input (Bayer, 06.04.2016)	NA	NA	1121	NA	c1_724_7B3
c1_724_8B1	c1	TITLIS	724	8	B	Switzerland	Eschikon field station	20.05.2016	2016	Input (Bayer, 06.04.2016)	NA	NA	1012	YES	c1_724_8B1
c1_724_8B2	c1	TITLIS	724	8	B	Switzerland	Eschikon field station	20.05.2016	2016	Input (Bayer, 06.04.2016)	NA	NA	1059	YES	c1_724_8B2
c1_85_10A3	c1	ARINA	85	10	A	Switzerland	Eschikon field station	20.05.2016	2016	Input (Bayer, 06.04.2016)	NA	NA	856	YES	c1_85_10A3
c1_85_13A1	c1	ARINA	85	13	A	Switzerland	Eschikon field station	20.05.2016	2016	Input (Bayer, 06.04.2016)	NA	NA	1342	YES	c1_85_13A1
c1_85_13A3	c1	ARINA	85	13	A	Switzerland	Eschikon field station	20.05.2016	2016	Input (Bayer, 06.04.2016)	ST16CH_1F19	SRR10728838	1343	YES	c1_85_13A3
c1_85_14A2	c1	ARINA	85	14	A	Switzerland	Eschikon field station	20.05.2016	2016	Input (Bayer, 06.04.2016)	NA	NA	630	YES	c1_85_14A2
c1_85_15A3	c1	ARINA	85	15	A	Switzerland	Eschikon field station	20.05.2016	2016	Input (Bayer, 06.04.2016)	NA	NA	941	YES	c1_85_15A3
c1_85_2B1	c1	ARINA	85	2	B	Switzerland	Eschikon field station	20.05.2016	2016	Input (Bayer, 06.04.2016)	ST16CH_1F1	SRR10728840	1216	YES	c1_85_2B1
c1_85_2B2	c1	ARINA	85	2	B	Switzerland	Eschikon field station	20.05.2016	2016	Input (Bayer, 06.04.2016)	NA	NA	1219	NA	c1_85_2B2
c1_85_2B3	c1	ARINA	85	2	B	Switzerland	Eschikon field station	20.05.2016	2016	Input (Bayer, 06.04.2016)	NA	NA	935	NA	c1_85_2B3
c1_85_7A1	c1	ARINA	85	7	A	Switzerland	Eschikon field station	20.05.2016	2016	Input (Bayer, 06.04.2016)	ST16CH_1F4	SRR10728837	301	NA	c1_85_7A1
c1_85_8A1	c1	ARINA	85	8	A	Switzerland	Eschikon field station	20.05.2016	2016	Input (Bayer, 06.04.2016)	NA	NA	1216	NA	c1_85_8A1
c1_85_9A1	c1	ARINA	85	9	A	Switzerland	Eschikon field station	20.05.2016	2016	Input (Bayer, 06.04.2016)	NA	NA	844	YES	c1_85_9A1
c1_85_9A2	c1	ARINA	85	9	A	Switzerland	Eschikon field station	20.05.2016	2016	Input (Bayer, 06.04.2016)	NA	NA	878	YES	c1_85_9A2
c1_85_9A3	c1	ARINA	85	9	A	Switzerland	Eschikon field station	20.05.2016	2016	Input (Bayer, 06.04.2016)	NA	NA	300	YES	c1_85_9A3
c1_85_9B1	c1	ARINA	85	9	B	Switzerland	Eschikon field station	20.05.2016	2016	Input (Bayer, 06.04.2016)	NA	NA	1438	YES	c1_85_9B1
c1_85_9B2	c1	ARINA	85	9	B	Switzerland	Eschikon field station	20.05.2016	2016	Input (Bayer, 06.04.2016)	ST16CH_1F11	SRR10728839	1343	YES	c1_85_9B2
c2_119_7B3	c2	CH CLARO	119	7	B	Switzerland	Eschikon field station	20.05.2016	2016	Input (Bayer, 06.04.2016)	ST16CH_2G18	SRR10728767	1146	YES	c2_119_7B3
c2_25_13A1	c2	CH CLARO	25	13	A	Switzerland	Eschikon field station	20.05.2016	2016	Input (Bayer, 06.04.2016)	ST16CH_2C7	SRR10728770	710	YES	c2_25_13A1
c2_439_7A2	c2	FOREL	439	7	A	Switzerland	Eschikon field station	20.05.2016	2016	Input (Bayer, 06.04.2016)	ST16CH_2N5	SRR10728763	897	YES	c2_439_7A2
c2_470_8A1	c2	CH CAMEDO	470	8	A	Switzerland	Eschikon field station	20.05.2016	2016	Input (Bayer, 06.04.2016)	ST16CH_2P3	SRR10728757	185	YES	c2_470_8A1
c2_470_8B3	c2	CH CAMEDO	470	8	B	Switzerland	Eschikon field station	20.05.2016	2016	Input (Bayer, 06.04.2016)	ST16CH_2P7	SRR10728755	979	YES	c2_470_8B3
c2_59_1A2	c2	AROBASE	59	1	A	Switzerland	Eschikon field station	20.05.2016	2016	Input (Bayer, 06.04.2016)	ST16CH_2X2	SRR10728749	597	YES	c2_59_1A2
c2_640_9A1	c2	CH CLARO	640	9	A	Switzerland	Eschikon field station	20.05.2016	2016	Input (Bayer, 06.04.2016)	ST16CH_2U24	SRR10728752	1563	YES	c2_640_9A1
c3_119_10A1	c3	CH CLARO	119	10	A	Switzerland	Eschikon field station	04.07.2016	2016	Input (Bayer, 06.04.2016); Aviator Xpro (Bayer, 25.05.2016); Osiris (06.06.2016)	NA	NA	275	YES	c3_119_10A1
c3_119_10A2	c3	CH CLARO	119	10	A	Switzerland	Eschikon field station	04.07.2016	2016	Input (Bayer, 06.04.2016); Aviator Xpro (Bayer, 25.05.2016); Osiris (06.06.2016)	NA	NA	254	NA	c3_119_10A2
c3_119_10A3	c3	CH CLARO	119	10	A	Switzerland	Eschikon field station	04.07.2016	2016	Input (Bayer, 06.04.2016); Aviator Xpro (Bayer, 25.05.2016); Osiris (06.06.2016)	NA	NA	254	NA	c3_119_10A3
c3_119_10B1	c3	CH CLARO	119	10	B	Switzerland	Eschikon field station	04.07.2016	2016	Input (Bayer, 06.04.2016); Aviator Xpro (Bayer, 25.05.2016); Osiris (06.06.2016)	NA	NA	885	NA	c3_119_10B1
c3_119_10B2	c3	CH CLARO	119	10	B	Switzerland	Eschikon field station	04.07.2016	2016	Input (Bayer, 06.04.2016); Aviator Xpro (Bayer, 25.05.2016); Osiris (06.06.2016)	ST16CH_3G26	SRR10728720	3	YES	c3_119_10B2
c3_119_10B3	c3	CH CLARO	119	10	B	Switzerland	Eschikon field station	04.07.2016	2016	Input (Bayer, 06.04.2016); Aviator Xpro (Bayer, 25.05.2016); Osiris (06.06.2016)	NA	NA	885	NA	c3_119_10B3
c3_119_11A1	c3	CH CLARO	119	11	A	Switzerland	Eschikon field station	04.07.2016	2016	Input (Bayer, 06.04.2016); Aviator Xpro (Bayer, 25.05.2016); Osiris (06.06.2016)	NA	NA	1305	NA	c3_119_11A1
c3_119_11A2	c3	CH CLARO	119	11	A	Switzerland	Eschikon field station	04.07.2016	2016	Input (Bayer, 06.04.2016); Aviator Xpro (Bayer, 25.05.2016); Osiris (06.06.2016)	NA	NA	1305	NA	c3_119_11A2
c3_119_11A3	c3	CH CLARO	119	11	A	Switzerland	Eschikon field station	04.07.2016	2016	Input (Bayer, 06.04.2016); Aviator Xpro (Bayer, 25.05.2016); Osiris (06.06.2016)	NA	NA	1307	YES	c3_119_11A3
c3_119_11B1	c3	CH CLARO	119	11	B	Switzerland	Eschikon field station	04.07.2016	2016	Input (Bayer, 06.04.2016); Aviator Xpro (Bayer, 25.05.2016); Osiris (06.06.2016)	NA	NA	763	NA	c3_119_11B1
c3_119_11B2	c3	CH CLARO	119	11	B	Switzerland	Eschikon field station	04.07.2016	2016	Input (Bayer, 06.04.2016); Aviator Xpro (Bayer, 25.05.2016); Osiris (06.06.2016)	NA	NA	748	NA	c3_119_11B2
c3_119_11B3	c3	CH CLARO	119	11	B	Switzerland	Eschikon field station	04.07.2016	2016	Input (Bayer, 06.04.2016); Aviator Xpro (Bayer, 25.05.2016); Osiris (06.06.2016)	NA	NA	1476	NA	c3_119_11B3
c3_119_12A1	c3	CH CLARO	119	12	A	Switzerland	Eschikon field station	04.07.2016	2016	Input (Bayer, 06.04.2016); Aviator Xpro (Bayer, 25.05.2016); Osiris (06.06.2016)	ST16CH_3G34	SRR10728719	1531	NA	c3_119_12A1
c3_119_12A2	c3	CH CLARO	119	12	A	Switzerland	Eschikon field station	04.07.2016	2016	Input (Bayer, 06.04.2016); Aviator Xpro (Bayer, 25.05.2016); Osiris (06.06.2016)	NA	NA	840	NA	c3_119_12A2
c3_119_12B1	c3	CH CLARO	119	12	B	Switzerland	Eschikon field station	04.07.2016	2016	Input (Bayer, 06.04.2016); Aviator Xpro (Bayer, 25.05.2016); Osiris (06.06.2016)	NA	NA	1162	NA	c3_119_12B1
c3_119_14A1	c3	CH CLARO	119	14	A	Switzerland	Eschikon field station	04.07.2016	2016	Input (Bayer, 06.04.2016); Aviator Xpro (Bayer, 25.05.2016); Osiris (06.06.2016)	NA	NA	1174	NA	c3_119_14A1
c3_119_14A2	c3	CH CLARO	119	14	A	Switzerland	Eschikon field station	04.07.2016	2016	Input (Bayer, 06.04.2016); Aviator Xpro (Bayer, 25.05.2016); Osiris (06.06.2016)	NA	NA	1187	NA	c3_119_14A2
c3_119_14B1	c3	CH CLARO	119	14	B	Switzerland	Eschikon field station	04.07.2016	2016	Input (Bayer, 06.04.2016); Aviator Xpro (Bayer, 25.05.2016); Osiris (06.06.2016)	NA	NA	1560	NA	c3_119_14B1
c3_119_14B2	c3	CH CLARO	119	14	B	Switzerland	Eschikon field station	04.07.2016	2016	Input (Bayer, 06.04.2016); Aviator Xpro (Bayer, 25.05.2016); Osiris (06.06.2016)	NA	NA	717	NA	c3_119_14B2
c3_119_15A1	c3	CH CLARO	119	15	A	Switzerland	Eschikon field station	04.07.2016	2016	Input (Bayer, 06.04.2016); Aviator Xpro (Bayer, 25.05.2016); Osiris (06.06.2016)	NA	NA	1153	NA	c3_119_15A1
c3_119_15A2	c3	CH CLARO	119	15	A	Switzerland	Eschikon field station	04.07.2016	2016	Input (Bayer, 06.04.2016); Aviator Xpro (Bayer, 25.05.2016); Osiris (06.06.2016)	NA	NA	1153	YES	c3_119_15A2
c3_119_16A1	c3	CH CLARO	119	16	A	Switzerland	Eschikon field station	04.07.2016	2016	Input (Bayer, 06.04.2016); Aviator Xpro (Bayer, 25.05.2016); Osiris (06.06.2016)	NA	NA	174	NA	c3_119_16A1
c3_119_16A2	c3	CH CLARO	119	16	A	Switzerland	Eschikon field station	04.07.2016	2016	Input (Bayer, 06.04.2016); Aviator Xpro (Bayer, 25.05.2016); Osiris (06.06.2016)	NA	NA	1558	NA	c3_119_16A2
c3_119_16B1	c3	CH CLARO	119	16	B	Switzerland	Eschikon field station	04.07.2016	2016	Input (Bayer, 06.04.2016); Aviator Xpro (Bayer, 25.05.2016); Osiris (06.06.2016)	NA	NA	942	YES	c3_119_16B1
c3_119_16B2	c3	CH CLARO	119	16	B	Switzerland	Eschikon field station	04.07.2016	2016	Input (Bayer, 06.04.2016); Aviator Xpro (Bayer, 25.05.2016); Osiris (06.06.2016)	ST16CH_3G46	SRR10728718	943	YES	c3_119_16B2
c3_119_1A1	c3	CH CLARO	119	1	A	Switzerland	Eschikon field station	04.07.2016	2016	Input (Bayer, 06.04.2016); Aviator Xpro (Bayer, 25.05.2016); Osiris (06.06.2016)	NA	NA	1094	NA	c3_119_1A1
c3_119_1A3	c3	CH CLARO	119	1	A	Switzerland	Eschikon field station	04.07.2016	2016	Input (Bayer, 06.04.2016); Aviator Xpro (Bayer, 25.05.2016); Osiris (06.06.2016)	NA	NA	1228	YES	c3_119_1A3
c3_119_2A1	c3	CH CLARO	119	2	A	Switzerland	Eschikon field station	04.07.2016	2016	Input (Bayer, 06.04.2016); Aviator Xpro (Bayer, 25.05.2016); Osiris (06.06.2016)	NA	NA	1120	NA	c3_119_2A1
c3_119_4A1	c3	CH CLARO	119	4	A	Switzerland	Eschikon field station	04.07.2016	2016	Input (Bayer, 06.04.2016); Aviator Xpro (Bayer, 25.05.2016); Osiris (06.06.2016)	ST16CH_3G6	SRR10728717	932	YES	c3_119_4A1
c3_119_5A2	c3	CH CLARO	119	5	A	Switzerland	Eschikon field station	04.07.2016	2016	Input (Bayer, 06.04.2016); Aviator Xpro (Bayer, 25.05.2016); Osiris (06.06.2016)	NA	NA	1330	NA	c3_119_5A2
c3_119_5A3	c3	CH CLARO	119	5	A	Switzerland	Eschikon field station	04.07.2016	2016	Input (Bayer, 06.04.2016); Aviator Xpro (Bayer, 25.05.2016); Osiris (06.06.2016)	NA	NA	1267	YES	c3_119_5A3
c3_119_5B2	c3	CH CLARO	119	5	B	Switzerland	Eschikon field station	04.07.2016	2016	Input (Bayer, 06.04.2016); Aviator Xpro (Bayer, 25.05.2016); Osiris (06.06.2016)	NA	NA	1231	YES	c3_119_5B2
c3_119_6A1	c3	CH CLARO	119	6	A	Switzerland	Eschikon field station	04.07.2016	2016	Input (Bayer, 06.04.2016); Aviator Xpro (Bayer, 25.05.2016); Osiris (06.06.2016)	NA	NA	49	NA	c3_119_6A1
c3_119_6B1	c3	CH CLARO	119	6	B	Switzerland	Eschikon field station	04.07.2016	2016	Input (Bayer, 06.04.2016); Aviator Xpro (Bayer, 25.05.2016); Osiris (06.06.2016)	NA	NA	930	YES	c3_119_6B1
c3_119_7A2	c3	CH CLARO	119	7	A	Switzerland	Eschikon field station	04.07.2016	2016	Input (Bayer, 06.04.2016); Aviator Xpro (Bayer, 25.05.2016); Osiris (06.06.2016)	NA	NA	1329	YES	c3_119_7A2
c3_119_7B1	c3	CH CLARO	119	7	B	Switzerland	Eschikon field station	04.07.2016	2016	Input (Bayer, 06.04.2016); Aviator Xpro (Bayer, 25.05.2016); Osiris (06.06.2016)	NA	NA	700	NA	c3_119_7B1
c3_119_7B2	c3	CH CLARO	119	7	B	Switzerland	Eschikon field station	04.07.2016	2016	Input (Bayer, 06.04.2016); Aviator Xpro (Bayer, 25.05.2016); Osiris (06.06.2016)	NA	NA	714	NA	c3_119_7B2
c3_119_7B3	c3	CH CLARO	119	7	B	Switzerland	Eschikon field station	04.07.2016	2016	Input (Bayer, 06.04.2016); Aviator Xpro (Bayer, 25.05.2016); Osiris (06.06.2016)	NA	NA	398	NA	c3_119_7B3
c3_119_8A1	c3	CH CLARO	119	8	A	Switzerland	Eschikon field station	04.07.2016	2016	Input (Bayer, 06.04.2016); Aviator Xpro (Bayer, 25.05.2016); Osiris (06.06.2016)	NA	NA	713	NA	c3_119_8A1
c3_119_8B1	c3	CH CLARO	119	8	B	Switzerland	Eschikon field station	04.07.2016	2016	Input (Bayer, 06.04.2016); Aviator Xpro (Bayer, 25.05.2016); Osiris (06.06.2016)	NA	NA	1333	NA	c3_119_8B1
c3_119_8B2	c3	CH CLARO	119	8	B	Switzerland	Eschikon field station	04.07.2016	2016	Input (Bayer, 06.04.2016); Aviator Xpro (Bayer, 25.05.2016); Osiris (06.06.2016)	NA	NA	1268	NA	c3_119_8B2
c3_119_8B3	c3	CH CLARO	119	8	B	Switzerland	Eschikon field station	04.07.2016	2016	Input (Bayer, 06.04.2016); Aviator Xpro (Bayer, 25.05.2016); Osiris (06.06.2016)	NA	NA	1333	NA	c3_119_8B3
c3_119_9B1	c3	CH CLARO	119	9	B	Switzerland	Eschikon field station	04.07.2016	2016	Input (Bayer, 06.04.2016); Aviator Xpro (Bayer, 25.05.2016); Osiris (06.06.2016)	NA	NA	874	NA	c3_119_9B1
c3_119_9B2	c3	CH CLARO	119	9	B	Switzerland	Eschikon field station	04.07.2016	2016	Input (Bayer, 06.04.2016); Aviator Xpro (Bayer, 25.05.2016); Osiris (06.06.2016)	NA	NA	1014	NA	c3_119_9B2
c3_135_10B2	c3	ZINAL	135	10	B	Switzerland	Eschikon field station	04.07.2016	2016	Input (Bayer, 06.04.2016); Aviator Xpro (Bayer, 25.05.2016); Osiris (06.06.2016)	NA	NA	1448	YES	c3_135_10B2
c3_135_11A1	c3	ZINAL	135	11	A	Switzerland	Eschikon field station	04.07.2016	2016	Input (Bayer, 06.04.2016); Aviator Xpro (Bayer, 25.05.2016); Osiris (06.06.2016)	NA	NA	85	NA	c3_135_11A1
c3_135_11A2	c3	ZINAL	135	11	A	Switzerland	Eschikon field station	04.07.2016	2016	Input (Bayer, 06.04.2016); Aviator Xpro (Bayer, 25.05.2016); Osiris (06.06.2016)	NA	NA	97	NA	c3_135_11A2
c3_135_11B1	c3	ZINAL	135	11	B	Switzerland	Eschikon field station	04.07.2016	2016	Input (Bayer, 06.04.2016); Aviator Xpro (Bayer, 25.05.2016); Osiris (06.06.2016)	NA	NA	86	NA	c3_135_11B1
c3_135_11B2	c3	ZINAL	135	11	B	Switzerland	Eschikon field station	04.07.2016	2016	Input (Bayer, 06.04.2016); Aviator Xpro (Bayer, 25.05.2016); Osiris (06.06.2016)	NA	NA	282	YES	c3_135_11B2
c3_135_11B3	c3	ZINAL	135	11	B	Switzerland	Eschikon field station	04.07.2016	2016	Input (Bayer, 06.04.2016); Aviator Xpro (Bayer, 25.05.2016); Osiris (06.06.2016)	NA	NA	98	NA	c3_135_11B3
c3_135_12A1	c3	ZINAL	135	12	A	Switzerland	Eschikon field station	04.07.2016	2016	Input (Bayer, 06.04.2016); Aviator Xpro (Bayer, 25.05.2016); Osiris (06.06.2016)	ST16CH_3H43	SRR10728714	789	YES	c3_135_12A1
c3_135_12A2	c3	ZINAL	135	12	A	Switzerland	Eschikon field station	04.07.2016	2016	Input (Bayer, 06.04.2016); Aviator Xpro (Bayer, 25.05.2016); Osiris (06.06.2016)	NA	NA	795	NA	c3_135_12A2
c3_135_12A3	c3	ZINAL	135	12	A	Switzerland	Eschikon field station	04.07.2016	2016	Input (Bayer, 06.04.2016); Aviator Xpro (Bayer, 25.05.2016); Osiris (06.06.2016)	NA	NA	795	NA	c3_135_12A3
c3_135_12B1	c3	ZINAL	135	12	B	Switzerland	Eschikon field station	04.07.2016	2016	Input (Bayer, 06.04.2016); Aviator Xpro (Bayer, 25.05.2016); Osiris (06.06.2016)	NA	NA	216	NA	c3_135_12B1
c3_135_12B2	c3	ZINAL	135	12	B	Switzerland	Eschikon field station	04.07.2016	2016	Input (Bayer, 06.04.2016); Aviator Xpro (Bayer, 25.05.2016); Osiris (06.06.2016)	NA	NA	216	NA	c3_135_12B2
c3_135_12B3	c3	ZINAL	135	12	B	Switzerland	Eschikon field station	04.07.2016	2016	Input (Bayer, 06.04.2016); Aviator Xpro (Bayer, 25.05.2016); Osiris (06.06.2016)	NA	NA	248	YES	c3_135_12B3
c3_135_13B1	c3	ZINAL	135	13	B	Switzerland	Eschikon field station	04.07.2016	2016	Input (Bayer, 06.04.2016); Aviator Xpro (Bayer, 25.05.2016); Osiris (06.06.2016)	ST16CH_3H49	SRR10728712	1131	NA	c3_135_13B1
c3_135_14A3	c3	ZINAL	135	14	A	Switzerland	Eschikon field station	04.07.2016	2016	Input (Bayer, 06.04.2016); Aviator Xpro (Bayer, 25.05.2016); Osiris (06.06.2016)	NA	NA	591	NA	c3_135_14A3
c3_135_14B1	c3	ZINAL	135	14	B	Switzerland	Eschikon field station	04.07.2016	2016	Input (Bayer, 06.04.2016); Aviator Xpro (Bayer, 25.05.2016); Osiris (06.06.2016)	NA	NA	1027	NA	c3_135_14B1
c3_135_14B3	c3	ZINAL	135	14	B	Switzerland	Eschikon field station	04.07.2016	2016	Input (Bayer, 06.04.2016); Aviator Xpro (Bayer, 25.05.2016); Osiris (06.06.2016)	NA	NA	1034	NA	c3_135_14B3
c3_135_16A1	c3	ZINAL	135	16	A	Switzerland	Eschikon field station	04.07.2016	2016	Input (Bayer, 06.04.2016); Aviator Xpro (Bayer, 25.05.2016); Osiris (06.06.2016)	NA	NA	1098	YES	c3_135_16A1
c3_135_16B1	c3	ZINAL	135	16	B	Switzerland	Eschikon field station	04.07.2016	2016	Input (Bayer, 06.04.2016); Aviator Xpro (Bayer, 25.05.2016); Osiris (06.06.2016)	NA	NA	158	YES	c3_135_16B1
c3_135_16D1	c3	ZINAL	135	16	D	Switzerland	Eschikon field station	04.07.2016	2016	Input (Bayer, 06.04.2016); Aviator Xpro (Bayer, 25.05.2016); Osiris (06.06.2016)	NA	NA	187	YES	c3_135_16D1
c3_135_1A1	c3	ZINAL	135	1	A	Switzerland	Eschikon field station	04.07.2016	2016	Input (Bayer, 06.04.2016); Aviator Xpro (Bayer, 25.05.2016); Osiris (06.06.2016)	NA	NA	80	NA	c3_135_1A1
c3_135_1A2	c3	ZINAL	135	1	A	Switzerland	Eschikon field station	04.07.2016	2016	Input (Bayer, 06.04.2016); Aviator Xpro (Bayer, 25.05.2016); Osiris (06.06.2016)	NA	NA	94	YES	c3_135_1A2
c3_135_1A3	c3	ZINAL	135	1	A	Switzerland	Eschikon field station	04.07.2016	2016	Input (Bayer, 06.04.2016); Aviator Xpro (Bayer, 25.05.2016); Osiris (06.06.2016)	NA	NA	92	NA	c3_135_1A3
c3_135_1B1	c3	ZINAL	135	1	B	Switzerland	Eschikon field station	04.07.2016	2016	Input (Bayer, 06.04.2016); Aviator Xpro (Bayer, 25.05.2016); Osiris (06.06.2016)	NA	NA	1043	YES	c3_135_1B1
c3_135_1B2	c3	ZINAL	135	1	B	Switzerland	Eschikon field station	04.07.2016	2016	Input (Bayer, 06.04.2016); Aviator Xpro (Bayer, 25.05.2016); Osiris (06.06.2016)	NA	NA	1049	YES	c3_135_1B2
c3_135_2A2	c3	ZINAL	135	2	A	Switzerland	Eschikon field station	04.07.2016	2016	Input (Bayer, 06.04.2016); Aviator Xpro (Bayer, 25.05.2016); Osiris (06.06.2016)	NA	NA	1248	YES	c3_135_2A2
c3_135_3A2	c3	ZINAL	135	3	A	Switzerland	Eschikon field station	04.07.2016	2016	Input (Bayer, 06.04.2016); Aviator Xpro (Bayer, 25.05.2016); Osiris (06.06.2016)	NA	NA	246	YES	c3_135_3A2
c3_135_3B1	c3	ZINAL	135	3	B	Switzerland	Eschikon field station	04.07.2016	2016	Input (Bayer, 06.04.2016); Aviator Xpro (Bayer, 25.05.2016); Osiris (06.06.2016)	NA	NA	173	YES	c3_135_3B1
c3_135_3B3	c3	ZINAL	135	3	B	Switzerland	Eschikon field station	04.07.2016	2016	Input (Bayer, 06.04.2016); Aviator Xpro (Bayer, 25.05.2016); Osiris (06.06.2016)	NA	NA	204	YES	c3_135_3B3
c3_135_4A1	c3	ZINAL	135	4	A	Switzerland	Eschikon field station	04.07.2016	2016	Input (Bayer, 06.04.2016); Aviator Xpro (Bayer, 25.05.2016); Osiris (06.06.2016)	NA	NA	1557	NA	c3_135_4A1
c3_135_4A2	c3	ZINAL	135	4	A	Switzerland	Eschikon field station	04.07.2016	2016	Input (Bayer, 06.04.2016); Aviator Xpro (Bayer, 25.05.2016); Osiris (06.06.2016)	NA	NA	1575	NA	c3_135_4A2
c3_135_4A3	c3	ZINAL	135	4	A	Switzerland	Eschikon field station	04.07.2016	2016	Input (Bayer, 06.04.2016); Aviator Xpro (Bayer, 25.05.2016); Osiris (06.06.2016)	NA	NA	1555	YES	c3_135_4A3
c3_135_4B1	c3	ZINAL	135	4	B	Switzerland	Eschikon field station	04.07.2016	2016	Input (Bayer, 06.04.2016); Aviator Xpro (Bayer, 25.05.2016); Osiris (06.06.2016)	NA	NA	1123	YES	c3_135_4B1
c3_135_4B2	c3	ZINAL	135	4	B	Switzerland	Eschikon field station	04.07.2016	2016	Input (Bayer, 06.04.2016); Aviator Xpro (Bayer, 25.05.2016); Osiris (06.06.2016)	NA	NA	1083	NA	c3_135_4B2
c3_135_5A1	c3	ZINAL	135	5	A	Switzerland	Eschikon field station	04.07.2016	2016	Input (Bayer, 06.04.2016); Aviator Xpro (Bayer, 25.05.2016); Osiris (06.06.2016)	NA	NA	1502	YES	c3_135_5A1
c3_135_5A2	c3	ZINAL	135	5	A	Switzerland	Eschikon field station	04.07.2016	2016	Input (Bayer, 06.04.2016); Aviator Xpro (Bayer, 25.05.2016); Osiris (06.06.2016)	NA	NA	1437	NA	c3_135_5A2
c3_135_6A1	c3	ZINAL	135	6	A	Switzerland	Eschikon field station	04.07.2016	2016	Input (Bayer, 06.04.2016); Aviator Xpro (Bayer, 25.05.2016); Osiris (06.06.2016)	NA	NA	1303	YES	c3_135_6A1
c3_135_6A2	c3	ZINAL	135	6	A	Switzerland	Eschikon field station	04.07.2016	2016	Input (Bayer, 06.04.2016); Aviator Xpro (Bayer, 25.05.2016); Osiris (06.06.2016)	NA	NA	1298	YES	c3_135_6A2
c3_135_6A3	c3	ZINAL	135	6	A	Switzerland	Eschikon field station	04.07.2016	2016	Input (Bayer, 06.04.2016); Aviator Xpro (Bayer, 25.05.2016); Osiris (06.06.2016)	NA	NA	1300	YES	c3_135_6A3
c3_135_6B1	c3	ZINAL	135	6	B	Switzerland	Eschikon field station	04.07.2016	2016	Input (Bayer, 06.04.2016); Aviator Xpro (Bayer, 25.05.2016); Osiris (06.06.2016)	NA	NA	598	YES	c3_135_6B1
c3_135_6B2	c3	ZINAL	135	6	B	Switzerland	Eschikon field station	04.07.2016	2016	Input (Bayer, 06.04.2016); Aviator Xpro (Bayer, 25.05.2016); Osiris (06.06.2016)	NA	NA	1295	YES	c3_135_6B2
c3_135_6B3	c3	ZINAL	135	6	B	Switzerland	Eschikon field station	04.07.2016	2016	Input (Bayer, 06.04.2016); Aviator Xpro (Bayer, 25.05.2016); Osiris (06.06.2016)	NA	NA	657	YES	c3_135_6B3
c3_135_7A1	c3	ZINAL	135	7	A	Switzerland	Eschikon field station	04.07.2016	2016	Input (Bayer, 06.04.2016); Aviator Xpro (Bayer, 25.05.2016); Osiris (06.06.2016)	NA	NA	626	NA	c3_135_7A1
c3_135_7A3	c3	ZINAL	135	7	A	Switzerland	Eschikon field station	04.07.2016	2016	Input (Bayer, 06.04.2016); Aviator Xpro (Bayer, 25.05.2016); Osiris (06.06.2016)	NA	NA	580	NA	c3_135_7A3
c3_135_7B1	c3	ZINAL	135	7	B	Switzerland	Eschikon field station	04.07.2016	2016	Input (Bayer, 06.04.2016); Aviator Xpro (Bayer, 25.05.2016); Osiris (06.06.2016)	ST16CH_3H26	SRR10728716	415	NA	c3_135_7B1
c3_135_7B2	c3	ZINAL	135	7	B	Switzerland	Eschikon field station	04.07.2016	2016	Input (Bayer, 06.04.2016); Aviator Xpro (Bayer, 25.05.2016); Osiris (06.06.2016)	NA	NA	418	YES	c3_135_7B2
c3_135_7B3	c3	ZINAL	135	7	B	Switzerland	Eschikon field station	04.07.2016	2016	Input (Bayer, 06.04.2016); Aviator Xpro (Bayer, 25.05.2016); Osiris (06.06.2016)	NA	NA	416	YES	c3_135_7B3
c3_135_8A1	c3	ZINAL	135	8	A	Switzerland	Eschikon field station	04.07.2016	2016	Input (Bayer, 06.04.2016); Aviator Xpro (Bayer, 25.05.2016); Osiris (06.06.2016)	NA	NA	626	NA	c3_135_8A1
c3_135_8B1	c3	ZINAL	135	8	B	Switzerland	Eschikon field station	04.07.2016	2016	Input (Bayer, 06.04.2016); Aviator Xpro (Bayer, 25.05.2016); Osiris (06.06.2016)	NA	NA	703	NA	c3_135_8B1
c3_135_8B2	c3	ZINAL	135	8	B	Switzerland	Eschikon field station	04.07.2016	2016	Input (Bayer, 06.04.2016); Aviator Xpro (Bayer, 25.05.2016); Osiris (06.06.2016)	NA	NA	703	NA	c3_135_8B2
c3_135_8B3	c3	ZINAL	135	8	B	Switzerland	Eschikon field station	04.07.2016	2016	Input (Bayer, 06.04.2016); Aviator Xpro (Bayer, 25.05.2016); Osiris (06.06.2016)	NA	NA	417	NA	c3_135_8B3
c3_135_9B1	c3	ZINAL	135	9	B	Switzerland	Eschikon field station	04.07.2016	2016	Input (Bayer, 06.04.2016); Aviator Xpro (Bayer, 25.05.2016); Osiris (06.06.2016)	NA	NA	476	NA	c3_135_9B1
c3_135_9B2	c3	ZINAL	135	9	B	Switzerland	Eschikon field station	04.07.2016	2016	Input (Bayer, 06.04.2016); Aviator Xpro (Bayer, 25.05.2016); Osiris (06.06.2016)	NA	NA	482	NA	c3_135_9B2
c3_135_9B3	c3	ZINAL	135	9	B	Switzerland	Eschikon field station	04.07.2016	2016	Input (Bayer, 06.04.2016); Aviator Xpro (Bayer, 25.05.2016); Osiris (06.06.2016)	NA	NA	545	YES	c3_135_9B3
c3_137_15A1	c3	TITLIS	137	15	A	Switzerland	Eschikon field station	04.07.2016	2016	Input (Bayer, 06.04.2016); Aviator Xpro (Bayer, 25.05.2016); Osiris (06.06.2016)	NA	NA	274	YES	c3_137_15A1
c3_137_15B1	c3	TITLIS	137	15	B	Switzerland	Eschikon field station	04.07.2016	2016	Input (Bayer, 06.04.2016); Aviator Xpro (Bayer, 25.05.2016); Osiris (06.06.2016)	NA	NA	291	YES	c3_137_15B1
c3_137_16A1	c3	TITLIS	137	16	A	Switzerland	Eschikon field station	04.07.2016	2016	Input (Bayer, 06.04.2016); Aviator Xpro (Bayer, 25.05.2016); Osiris (06.06.2016)	NA	NA	438	YES	c3_137_16A1
c3_137_16B1	c3	TITLIS	137	16	B	Switzerland	Eschikon field station	04.07.2016	2016	Input (Bayer, 06.04.2016); Aviator Xpro (Bayer, 25.05.2016); Osiris (06.06.2016)	NA	NA	126	YES	c3_137_16B1
c3_137_16B2	c3	TITLIS	137	16	B	Switzerland	Eschikon field station	04.07.2016	2016	Input (Bayer, 06.04.2016); Aviator Xpro (Bayer, 25.05.2016); Osiris (06.06.2016)	NA	NA	110	NA	c3_137_16B2
c3_137_16B3	c3	TITLIS	137	16	B	Switzerland	Eschikon field station	04.07.2016	2016	Input (Bayer, 06.04.2016); Aviator Xpro (Bayer, 25.05.2016); Osiris (06.06.2016)	NA	NA	114	NA	c3_137_16B3
c3_137_1A1	c3	TITLIS	137	1	A	Switzerland	Eschikon field station	04.07.2016	2016	Input (Bayer, 06.04.2016); Aviator Xpro (Bayer, 25.05.2016); Osiris (06.06.2016)	NA	NA	383	YES	c3_137_1A1
c3_137_1A2	c3	TITLIS	137	1	A	Switzerland	Eschikon field station	04.07.2016	2016	Input (Bayer, 06.04.2016); Aviator Xpro (Bayer, 25.05.2016); Osiris (06.06.2016)	NA	NA	618	NA	c3_137_1A2
c3_137_1A3	c3	TITLIS	137	1	A	Switzerland	Eschikon field station	04.07.2016	2016	Input (Bayer, 06.04.2016); Aviator Xpro (Bayer, 25.05.2016); Osiris (06.06.2016)	NA	NA	618	NA	c3_137_1A3
c3_137_3A1	c3	TITLIS	137	3	A	Switzerland	Eschikon field station	04.07.2016	2016	Input (Bayer, 06.04.2016); Aviator Xpro (Bayer, 25.05.2016); Osiris (06.06.2016)	NA	NA	133	YES	c3_137_3A1
c3_137_3A2	c3	TITLIS	137	3	A	Switzerland	Eschikon field station	04.07.2016	2016	Input (Bayer, 06.04.2016); Aviator Xpro (Bayer, 25.05.2016); Osiris (06.06.2016)	ST16CH_3I5	SRR10728709	103	NA	c3_137_3A2
c3_137_3A3	c3	TITLIS	137	3	A	Switzerland	Eschikon field station	04.07.2016	2016	Input (Bayer, 06.04.2016); Aviator Xpro (Bayer, 25.05.2016); Osiris (06.06.2016)	NA	NA	38	YES	c3_137_3A3
c3_137_3B1	c3	TITLIS	137	3	B	Switzerland	Eschikon field station	04.07.2016	2016	Input (Bayer, 06.04.2016); Aviator Xpro (Bayer, 25.05.2016); Osiris (06.06.2016)	NA	NA	1236	YES	c3_137_3B1
c3_137_4A1	c3	TITLIS	137	4	A	Switzerland	Eschikon field station	04.07.2016	2016	Input (Bayer, 06.04.2016); Aviator Xpro (Bayer, 25.05.2016); Osiris (06.06.2016)	NA	NA	740	YES	c3_137_4A1
c3_137_4B1	c3	TITLIS	137	4	B	Switzerland	Eschikon field station	04.07.2016	2016	Input (Bayer, 06.04.2016); Aviator Xpro (Bayer, 25.05.2016); Osiris (06.06.2016)	NA	NA	624	NA	c3_137_4B1
c3_137_4B2	c3	TITLIS	137	4	B	Switzerland	Eschikon field station	04.07.2016	2016	Input (Bayer, 06.04.2016); Aviator Xpro (Bayer, 25.05.2016); Osiris (06.06.2016)	NA	NA	624	NA	c3_137_4B2
c3_137_4B3	c3	TITLIS	137	4	B	Switzerland	Eschikon field station	04.07.2016	2016	Input (Bayer, 06.04.2016); Aviator Xpro (Bayer, 25.05.2016); Osiris (06.06.2016)	NA	NA	1191	YES	c3_137_4B3
c3_137_5A2	c3	TITLIS	137	5	A	Switzerland	Eschikon field station	04.07.2016	2016	Input (Bayer, 06.04.2016); Aviator Xpro (Bayer, 25.05.2016); Osiris (06.06.2016)	NA	NA	1159	NA	c3_137_5A2
c3_137_5A3	c3	TITLIS	137	5	A	Switzerland	Eschikon field station	04.07.2016	2016	Input (Bayer, 06.04.2016); Aviator Xpro (Bayer, 25.05.2016); Osiris (06.06.2016)	NA	NA	1159	NA	c3_137_5A3
c3_137_5B1	c3	TITLIS	137	5	B	Switzerland	Eschikon field station	04.07.2016	2016	Input (Bayer, 06.04.2016); Aviator Xpro (Bayer, 25.05.2016); Osiris (06.06.2016)	ST16CH_3I14	SRR10728711	1231	NA	c3_137_5B1
c3_137_6A1	c3	TITLIS	137	6	A	Switzerland	Eschikon field station	04.07.2016	2016	Input (Bayer, 06.04.2016); Aviator Xpro (Bayer, 25.05.2016); Osiris (06.06.2016)	NA	NA	611	NA	c3_137_6A1
c3_137_6A2	c3	TITLIS	137	6	A	Switzerland	Eschikon field station	04.07.2016	2016	Input (Bayer, 06.04.2016); Aviator Xpro (Bayer, 25.05.2016); Osiris (06.06.2016)	NA	NA	635	NA	c3_137_6A2
c3_137_6A3	c3	TITLIS	137	6	A	Switzerland	Eschikon field station	04.07.2016	2016	Input (Bayer, 06.04.2016); Aviator Xpro (Bayer, 25.05.2016); Osiris (06.06.2016)	NA	NA	635	NA	c3_137_6A3
c3_137_6B2	c3	TITLIS	137	6	B	Switzerland	Eschikon field station	04.07.2016	2016	Input (Bayer, 06.04.2016); Aviator Xpro (Bayer, 25.05.2016); Osiris (06.06.2016)	NA	NA	612	NA	c3_137_6B2
c3_137_6B3	c3	TITLIS	137	6	B	Switzerland	Eschikon field station	04.07.2016	2016	Input (Bayer, 06.04.2016); Aviator Xpro (Bayer, 25.05.2016); Osiris (06.06.2016)	NA	NA	612	NA	c3_137_6B3
c3_137_7A2	c3	TITLIS	137	7	A	Switzerland	Eschikon field station	04.07.2016	2016	Input (Bayer, 06.04.2016); Aviator Xpro (Bayer, 25.05.2016); Osiris (06.06.2016)	NA	NA	375	NA	c3_137_7A2
c3_137_8A1	c3	TITLIS	137	8	A	Switzerland	Eschikon field station	04.07.2016	2016	Input (Bayer, 06.04.2016); Aviator Xpro (Bayer, 25.05.2016); Osiris (06.06.2016)	NA	NA	1553	YES	c3_137_8A1
c3_137_8A3	c3	TITLIS	137	8	A	Switzerland	Eschikon field station	04.07.2016	2016	Input (Bayer, 06.04.2016); Aviator Xpro (Bayer, 25.05.2016); Osiris (06.06.2016)	NA	NA	1552	YES	c3_137_8A3
c3_137_9A2	c3	TITLIS	137	9	A	Switzerland	Eschikon field station	04.07.2016	2016	Input (Bayer, 06.04.2016); Aviator Xpro (Bayer, 25.05.2016); Osiris (06.06.2016)	NA	NA	788	YES	c3_137_9A2
c3_137_9B1	c3	TITLIS	137	9	B	Switzerland	Eschikon field station	04.07.2016	2016	Input (Bayer, 06.04.2016); Aviator Xpro (Bayer, 25.05.2016); Osiris (06.06.2016)	NA	NA	1380	YES	c3_137_9B1
c3_14_10A1	c3	LORENZO	14	10	A	Switzerland	Eschikon field station	04.07.2016	2016	Input (Bayer, 06.04.2016); Aviator Xpro (Bayer, 25.05.2016); Osiris (06.06.2016)	NA	NA	360	NA	c3_14_10A1
c3_14_10A2	c3	LORENZO	14	10	A	Switzerland	Eschikon field station	04.07.2016	2016	Input (Bayer, 06.04.2016); Aviator Xpro (Bayer, 25.05.2016); Osiris (06.06.2016)	NA	NA	369	NA	c3_14_10A2
c3_14_10A3	c3	LORENZO	14	10	A	Switzerland	Eschikon field station	04.07.2016	2016	Input (Bayer, 06.04.2016); Aviator Xpro (Bayer, 25.05.2016); Osiris (06.06.2016)	NA	NA	566	NA	c3_14_10A3
c3_14_10B1	c3	LORENZO	14	10	B	Switzerland	Eschikon field station	04.07.2016	2016	Input (Bayer, 06.04.2016); Aviator Xpro (Bayer, 25.05.2016); Osiris (06.06.2016)	NA	NA	906	YES	c3_14_10B1
c3_14_10B2	c3	LORENZO	14	10	B	Switzerland	Eschikon field station	04.07.2016	2016	Input (Bayer, 06.04.2016); Aviator Xpro (Bayer, 25.05.2016); Osiris (06.06.2016)	NA	NA	924	NA	c3_14_10B2
c3_14_10B3	c3	LORENZO	14	10	B	Switzerland	Eschikon field station	04.07.2016	2016	Input (Bayer, 06.04.2016); Aviator Xpro (Bayer, 25.05.2016); Osiris (06.06.2016)	NA	NA	924	NA	c3_14_10B3
c3_14_12A1	c3	LORENZO	14	12	A	Switzerland	Eschikon field station	04.07.2016	2016	Input (Bayer, 06.04.2016); Aviator Xpro (Bayer, 25.05.2016); Osiris (06.06.2016)	NA	NA	1144	NA	c3_14_12A1
c3_14_12A2	c3	LORENZO	14	12	A	Switzerland	Eschikon field station	04.07.2016	2016	Input (Bayer, 06.04.2016); Aviator Xpro (Bayer, 25.05.2016); Osiris (06.06.2016)	NA	NA	1144	NA	c3_14_12A2
c3_14_12B1	c3	LORENZO	14	12	B	Switzerland	Eschikon field station	04.07.2016	2016	Input (Bayer, 06.04.2016); Aviator Xpro (Bayer, 25.05.2016); Osiris (06.06.2016)	NA	NA	802	YES	c3_14_12B1
c3_14_12C1	c3	LORENZO	14	12	C	Switzerland	Eschikon field station	04.07.2016	2016	Input (Bayer, 06.04.2016); Aviator Xpro (Bayer, 25.05.2016); Osiris (06.06.2016)	NA	NA	1	YES	c3_14_12C1
c3_14_13A2	c3	LORENZO	14	13	A	Switzerland	Eschikon field station	04.07.2016	2016	Input (Bayer, 06.04.2016); Aviator Xpro (Bayer, 25.05.2016); Osiris (06.06.2016)	NA	NA	337	NA	c3_14_13A2
c3_14_13A3	c3	LORENZO	14	13	A	Switzerland	Eschikon field station	04.07.2016	2016	Input (Bayer, 06.04.2016); Aviator Xpro (Bayer, 25.05.2016); Osiris (06.06.2016)	NA	NA	337	NA	c3_14_13A3
c3_14_13B1	c3	LORENZO	14	13	B	Switzerland	Eschikon field station	04.07.2016	2016	Input (Bayer, 06.04.2016); Aviator Xpro (Bayer, 25.05.2016); Osiris (06.06.2016)	NA	NA	339	YES	c3_14_13B1
c3_14_13B2	c3	LORENZO	14	13	B	Switzerland	Eschikon field station	04.07.2016	2016	Input (Bayer, 06.04.2016); Aviator Xpro (Bayer, 25.05.2016); Osiris (06.06.2016)	NA	NA	340	YES	c3_14_13B2
c3_14_13B3	c3	LORENZO	14	13	B	Switzerland	Eschikon field station	04.07.2016	2016	Input (Bayer, 06.04.2016); Aviator Xpro (Bayer, 25.05.2016); Osiris (06.06.2016)	NA	NA	337	NA	c3_14_13B3
c3_14_14A2	c3	LORENZO	14	14	A	Switzerland	Eschikon field station	04.07.2016	2016	Input (Bayer, 06.04.2016); Aviator Xpro (Bayer, 25.05.2016); Osiris (06.06.2016)	ST16CH_3B36	SRR10728740	1136	YES	c3_14_14A2
c3_14_14A3	c3	LORENZO	14	14	A	Switzerland	Eschikon field station	04.07.2016	2016	Input (Bayer, 06.04.2016); Aviator Xpro (Bayer, 25.05.2016); Osiris (06.06.2016)	NA	NA	1253	NA	c3_14_14A3
c3_14_14B1	c3	LORENZO	14	14	B	Switzerland	Eschikon field station	04.07.2016	2016	Input (Bayer, 06.04.2016); Aviator Xpro (Bayer, 25.05.2016); Osiris (06.06.2016)	NA	NA	332	NA	c3_14_14B1
c3_14_14B3	c3	LORENZO	14	14	B	Switzerland	Eschikon field station	04.07.2016	2016	Input (Bayer, 06.04.2016); Aviator Xpro (Bayer, 25.05.2016); Osiris (06.06.2016)	NA	NA	333	YES	c3_14_14B3
c3_14_15A2	c3	LORENZO	14	15	A	Switzerland	Eschikon field station	04.07.2016	2016	Input (Bayer, 06.04.2016); Aviator Xpro (Bayer, 25.05.2016); Osiris (06.06.2016)	NA	NA	200	YES	c3_14_15A2
c3_14_15A3	c3	LORENZO	14	15	A	Switzerland	Eschikon field station	04.07.2016	2016	Input (Bayer, 06.04.2016); Aviator Xpro (Bayer, 25.05.2016); Osiris (06.06.2016)	NA	NA	1127	NA	c3_14_15A3
c3_14_15B3	c3	LORENZO	14	15	B	Switzerland	Eschikon field station	04.07.2016	2016	Input (Bayer, 06.04.2016); Aviator Xpro (Bayer, 25.05.2016); Osiris (06.06.2016)	NA	NA	211	YES	c3_14_15B3
c3_14_16A2	c3	LORENZO	14	16	A	Switzerland	Eschikon field station	04.07.2016	2016	Input (Bayer, 06.04.2016); Aviator Xpro (Bayer, 25.05.2016); Osiris (06.06.2016)	NA	NA	1377	NA	c3_14_16A2
c3_14_16A3	c3	LORENZO	14	16	A	Switzerland	Eschikon field station	04.07.2016	2016	Input (Bayer, 06.04.2016); Aviator Xpro (Bayer, 25.05.2016); Osiris (06.06.2016)	NA	NA	1378	YES	c3_14_16A3
c3_14_16B1	c3	LORENZO	14	16	B	Switzerland	Eschikon field station	04.07.2016	2016	Input (Bayer, 06.04.2016); Aviator Xpro (Bayer, 25.05.2016); Osiris (06.06.2016)	NA	NA	455	NA	c3_14_16B1
c3_14_16B3	c3	LORENZO	14	16	B	Switzerland	Eschikon field station	04.07.2016	2016	Input (Bayer, 06.04.2016); Aviator Xpro (Bayer, 25.05.2016); Osiris (06.06.2016)	NA	NA	606	YES	c3_14_16B3
c3_14_1A1	c3	LORENZO	14	1	A	Switzerland	Eschikon field station	04.07.2016	2016	Input (Bayer, 06.04.2016); Aviator Xpro (Bayer, 25.05.2016); Osiris (06.06.2016)	ST16CH_3B1	SRR10728741	1467	NA	c3_14_1A1
c3_14_1A2	c3	LORENZO	14	1	A	Switzerland	Eschikon field station	04.07.2016	2016	Input (Bayer, 06.04.2016); Aviator Xpro (Bayer, 25.05.2016); Osiris (06.06.2016)	NA	NA	1467	NA	c3_14_1A2
c3_14_1B1	c3	LORENZO	14	1	B	Switzerland	Eschikon field station	04.07.2016	2016	Input (Bayer, 06.04.2016); Aviator Xpro (Bayer, 25.05.2016); Osiris (06.06.2016)	NA	NA	136	YES	c3_14_1B1
c3_14_2A1	c3	LORENZO	14	2	A	Switzerland	Eschikon field station	04.07.2016	2016	Input (Bayer, 06.04.2016); Aviator Xpro (Bayer, 25.05.2016); Osiris (06.06.2016)	NA	NA	1046	NA	c3_14_2A1
c3_14_2A3	c3	LORENZO	14	2	A	Switzerland	Eschikon field station	04.07.2016	2016	Input (Bayer, 06.04.2016); Aviator Xpro (Bayer, 25.05.2016); Osiris (06.06.2016)	NA	NA	907	NA	c3_14_2A3
c3_14_2B1	c3	LORENZO	14	2	B	Switzerland	Eschikon field station	04.07.2016	2016	Input (Bayer, 06.04.2016); Aviator Xpro (Bayer, 25.05.2016); Osiris (06.06.2016)	NA	NA	1046	NA	c3_14_2B1
c3_14_2B2	c3	LORENZO	14	2	B	Switzerland	Eschikon field station	04.07.2016	2016	Input (Bayer, 06.04.2016); Aviator Xpro (Bayer, 25.05.2016); Osiris (06.06.2016)	NA	NA	1127	NA	c3_14_2B2
c3_14_2B3	c3	LORENZO	14	2	B	Switzerland	Eschikon field station	04.07.2016	2016	Input (Bayer, 06.04.2016); Aviator Xpro (Bayer, 25.05.2016); Osiris (06.06.2016)	ST16CH_3B8	SRR10728739	1054	NA	c3_14_2B3
c3_14_4A1	c3	LORENZO	14	4	A	Switzerland	Eschikon field station	04.07.2016	2016	Input (Bayer, 06.04.2016); Aviator Xpro (Bayer, 25.05.2016); Osiris (06.06.2016)	NA	NA	1377	NA	c3_14_4A1
c3_14_4B1	c3	LORENZO	14	4	B	Switzerland	Eschikon field station	04.07.2016	2016	Input (Bayer, 06.04.2016); Aviator Xpro (Bayer, 25.05.2016); Osiris (06.06.2016)	NA	NA	1573	YES	c3_14_4B1
c3_14_4B2	c3	LORENZO	14	4	B	Switzerland	Eschikon field station	04.07.2016	2016	Input (Bayer, 06.04.2016); Aviator Xpro (Bayer, 25.05.2016); Osiris (06.06.2016)	NA	NA	253	YES	c3_14_4B2
c3_14_6A1	c3	LORENZO	14	6	A	Switzerland	Eschikon field station	04.07.2016	2016	Input (Bayer, 06.04.2016); Aviator Xpro (Bayer, 25.05.2016); Osiris (06.06.2016)	NA	NA	148	YES	c3_14_6A1
c3_14_6A2	c3	LORENZO	14	6	A	Switzerland	Eschikon field station	04.07.2016	2016	Input (Bayer, 06.04.2016); Aviator Xpro (Bayer, 25.05.2016); Osiris (06.06.2016)	NA	NA	1469	NA	c3_14_6A2
c3_14_6A3	c3	LORENZO	14	6	A	Switzerland	Eschikon field station	04.07.2016	2016	Input (Bayer, 06.04.2016); Aviator Xpro (Bayer, 25.05.2016); Osiris (06.06.2016)	NA	NA	1127	NA	c3_14_6A3
c3_14_6B2	c3	LORENZO	14	6	B	Switzerland	Eschikon field station	04.07.2016	2016	Input (Bayer, 06.04.2016); Aviator Xpro (Bayer, 25.05.2016); Osiris (06.06.2016)	NA	NA	493	NA	c3_14_6B2
c3_14_6B3	c3	LORENZO	14	6	B	Switzerland	Eschikon field station	04.07.2016	2016	Input (Bayer, 06.04.2016); Aviator Xpro (Bayer, 25.05.2016); Osiris (06.06.2016)	NA	NA	1134	NA	c3_14_6B3
c3_14_8A1	c3	LORENZO	14	8	A	Switzerland	Eschikon field station	04.07.2016	2016	Input (Bayer, 06.04.2016); Aviator Xpro (Bayer, 25.05.2016); Osiris (06.06.2016)	NA	NA	493	NA	c3_14_8A1
c3_14_8A2	c3	LORENZO	14	8	A	Switzerland	Eschikon field station	04.07.2016	2016	Input (Bayer, 06.04.2016); Aviator Xpro (Bayer, 25.05.2016); Osiris (06.06.2016)	NA	NA	1127	NA	c3_14_8A2
c3_14_8A3	c3	LORENZO	14	8	A	Switzerland	Eschikon field station	04.07.2016	2016	Input (Bayer, 06.04.2016); Aviator Xpro (Bayer, 25.05.2016); Osiris (06.06.2016)	NA	NA	1111	YES	c3_14_8A3
c3_14_9A1	c3	LORENZO	14	9	A	Switzerland	Eschikon field station	04.07.2016	2016	Input (Bayer, 06.04.2016); Aviator Xpro (Bayer, 25.05.2016); Osiris (06.06.2016)	NA	NA	1122	NA	c3_14_9A1
c3_158_10A1	c3	CH CAMEDO	158	10	A	Switzerland	Eschikon field station	04.07.2016	2016	Input (Bayer, 06.04.2016); Aviator Xpro (Bayer, 25.05.2016); Osiris (06.06.2016)	NA	NA	497	NA	c3_158_10A1
c3_158_10A2	c3	CH CAMEDO	158	10	A	Switzerland	Eschikon field station	04.07.2016	2016	Input (Bayer, 06.04.2016); Aviator Xpro (Bayer, 25.05.2016); Osiris (06.06.2016)	NA	NA	496	NA	c3_158_10A2
c3_158_10C1	c3	CH CAMEDO	158	10	C	Switzerland	Eschikon field station	04.07.2016	2016	Input (Bayer, 06.04.2016); Aviator Xpro (Bayer, 25.05.2016); Osiris (06.06.2016)	NA	NA	1210	YES	c3_158_10C1
c3_158_10C3	c3	CH CAMEDO	158	10	C	Switzerland	Eschikon field station	04.07.2016	2016	Input (Bayer, 06.04.2016); Aviator Xpro (Bayer, 25.05.2016); Osiris (06.06.2016)	NA	NA	1093	YES	c3_158_10C3
c3_158_11A1	c3	CH CAMEDO	158	11	A	Switzerland	Eschikon field station	04.07.2016	2016	Input (Bayer, 06.04.2016); Aviator Xpro (Bayer, 25.05.2016); Osiris (06.06.2016)	NA	NA	1470	YES	c3_158_11A1
c3_158_11B3	c3	CH CAMEDO	158	11	B	Switzerland	Eschikon field station	04.07.2016	2016	Input (Bayer, 06.04.2016); Aviator Xpro (Bayer, 25.05.2016); Osiris (06.06.2016)	ST16CH_3K32	SRR10728707	536	YES	c3_158_11B3
c3_158_12B1	c3	CH CAMEDO	158	12	B	Switzerland	Eschikon field station	04.07.2016	2016	Input (Bayer, 06.04.2016); Aviator Xpro (Bayer, 25.05.2016); Osiris (06.06.2016)	NA	NA	513	NA	c3_158_12B1
c3_158_12B3	c3	CH CAMEDO	158	12	B	Switzerland	Eschikon field station	04.07.2016	2016	Input (Bayer, 06.04.2016); Aviator Xpro (Bayer, 25.05.2016); Osiris (06.06.2016)	NA	NA	529	YES	c3_158_12B3
c3_158_12C1	c3	CH CAMEDO	158	12	C	Switzerland	Eschikon field station	04.07.2016	2016	Input (Bayer, 06.04.2016); Aviator Xpro (Bayer, 25.05.2016); Osiris (06.06.2016)	NA	NA	1185	YES	c3_158_12C1
c3_158_12C2	c3	CH CAMEDO	158	12	C	Switzerland	Eschikon field station	04.07.2016	2016	Input (Bayer, 06.04.2016); Aviator Xpro (Bayer, 25.05.2016); Osiris (06.06.2016)	NA	NA	521	YES	c3_158_12C2
c3_158_12C3	c3	CH CAMEDO	158	12	C	Switzerland	Eschikon field station	04.07.2016	2016	Input (Bayer, 06.04.2016); Aviator Xpro (Bayer, 25.05.2016); Osiris (06.06.2016)	NA	NA	68	YES	c3_158_12C3
c3_158_13B1	c3	CH CAMEDO	158	13	B	Switzerland	Eschikon field station	04.07.2016	2016	Input (Bayer, 06.04.2016); Aviator Xpro (Bayer, 25.05.2016); Osiris (06.06.2016)	NA	NA	989	YES	c3_158_13B1
c3_158_13B2	c3	CH CAMEDO	158	13	B	Switzerland	Eschikon field station	04.07.2016	2016	Input (Bayer, 06.04.2016); Aviator Xpro (Bayer, 25.05.2016); Osiris (06.06.2016)	NA	NA	1173	YES	c3_158_13B2
c3_158_14B2	c3	CH CAMEDO	158	14	B	Switzerland	Eschikon field station	04.07.2016	2016	Input (Bayer, 06.04.2016); Aviator Xpro (Bayer, 25.05.2016); Osiris (06.06.2016)	NA	NA	513	NA	c3_158_14B2
c3_158_15B1	c3	CH CAMEDO	158	15	B	Switzerland	Eschikon field station	04.07.2016	2016	Input (Bayer, 06.04.2016); Aviator Xpro (Bayer, 25.05.2016); Osiris (06.06.2016)	NA	NA	69	NA	c3_158_15B1
c3_158_15B2	c3	CH CAMEDO	158	15	B	Switzerland	Eschikon field station	04.07.2016	2016	Input (Bayer, 06.04.2016); Aviator Xpro (Bayer, 25.05.2016); Osiris (06.06.2016)	NA	NA	69	NA	c3_158_15B2
c3_158_16A3	c3	CH CAMEDO	158	16	A	Switzerland	Eschikon field station	04.07.2016	2016	Input (Bayer, 06.04.2016); Aviator Xpro (Bayer, 25.05.2016); Osiris (06.06.2016)	NA	NA	435	NA	c3_158_16A3
c3_158_16B1	c3	CH CAMEDO	158	16	B	Switzerland	Eschikon field station	04.07.2016	2016	Input (Bayer, 06.04.2016); Aviator Xpro (Bayer, 25.05.2016); Osiris (06.06.2016)	NA	NA	1094	NA	c3_158_16B1
c3_158_16B2	c3	CH CAMEDO	158	16	B	Switzerland	Eschikon field station	04.07.2016	2016	Input (Bayer, 06.04.2016); Aviator Xpro (Bayer, 25.05.2016); Osiris (06.06.2016)	NA	NA	917	YES	c3_158_16B2
c3_158_16B3	c3	CH CAMEDO	158	16	B	Switzerland	Eschikon field station	04.07.2016	2016	Input (Bayer, 06.04.2016); Aviator Xpro (Bayer, 25.05.2016); Osiris (06.06.2016)	NA	NA	1089	NA	c3_158_16B3
c3_158_1B1	c3	CH CAMEDO	158	1	B	Switzerland	Eschikon field station	04.07.2016	2016	Input (Bayer, 06.04.2016); Aviator Xpro (Bayer, 25.05.2016); Osiris (06.06.2016)	ST16CH_3K1	SRR10728708	1006	YES	c3_158_1B1
c3_158_1B3	c3	CH CAMEDO	158	1	B	Switzerland	Eschikon field station	04.07.2016	2016	Input (Bayer, 06.04.2016); Aviator Xpro (Bayer, 25.05.2016); Osiris (06.06.2016)	NA	NA	1096	NA	c3_158_1B3
c3_158_2A2	c3	CH CAMEDO	158	2	A	Switzerland	Eschikon field station	04.07.2016	2016	Input (Bayer, 06.04.2016); Aviator Xpro (Bayer, 25.05.2016); Osiris (06.06.2016)	NA	NA	1344	YES	c3_158_2A2
c3_158_2A3	c3	CH CAMEDO	158	2	A	Switzerland	Eschikon field station	04.07.2016	2016	Input (Bayer, 06.04.2016); Aviator Xpro (Bayer, 25.05.2016); Osiris (06.06.2016)	NA	NA	1347	YES	c3_158_2A3
c3_158_2B1	c3	CH CAMEDO	158	2	B	Switzerland	Eschikon field station	04.07.2016	2016	Input (Bayer, 06.04.2016); Aviator Xpro (Bayer, 25.05.2016); Osiris (06.06.2016)	NA	NA	539	NA	c3_158_2B1
c3_158_2B2	c3	CH CAMEDO	158	2	B	Switzerland	Eschikon field station	04.07.2016	2016	Input (Bayer, 06.04.2016); Aviator Xpro (Bayer, 25.05.2016); Osiris (06.06.2016)	NA	NA	715	NA	c3_158_2B2
c3_158_2B3	c3	CH CAMEDO	158	2	B	Switzerland	Eschikon field station	04.07.2016	2016	Input (Bayer, 06.04.2016); Aviator Xpro (Bayer, 25.05.2016); Osiris (06.06.2016)	NA	NA	656	NA	c3_158_2B3
c3_158_3A2	c3	CH CAMEDO	158	3	A	Switzerland	Eschikon field station	04.07.2016	2016	Input (Bayer, 06.04.2016); Aviator Xpro (Bayer, 25.05.2016); Osiris (06.06.2016)	NA	NA	591	NA	c3_158_3A2
c3_158_3A3	c3	CH CAMEDO	158	3	A	Switzerland	Eschikon field station	04.07.2016	2016	Input (Bayer, 06.04.2016); Aviator Xpro (Bayer, 25.05.2016); Osiris (06.06.2016)	NA	NA	633	NA	c3_158_3A3
c3_158_3B1	c3	CH CAMEDO	158	3	B	Switzerland	Eschikon field station	04.07.2016	2016	Input (Bayer, 06.04.2016); Aviator Xpro (Bayer, 25.05.2016); Osiris (06.06.2016)	NA	NA	1024	NA	c3_158_3B1
c3_158_4A3	c3	CH CAMEDO	158	4	A	Switzerland	Eschikon field station	04.07.2016	2016	Input (Bayer, 06.04.2016); Aviator Xpro (Bayer, 25.05.2016); Osiris (06.06.2016)	NA	NA	226	YES	c3_158_4A3
c3_158_4B1	c3	CH CAMEDO	158	4	B	Switzerland	Eschikon field station	04.07.2016	2016	Input (Bayer, 06.04.2016); Aviator Xpro (Bayer, 25.05.2016); Osiris (06.06.2016)	NA	NA	172	YES	c3_158_4B1
c3_158_4B2	c3	CH CAMEDO	158	4	B	Switzerland	Eschikon field station	04.07.2016	2016	Input (Bayer, 06.04.2016); Aviator Xpro (Bayer, 25.05.2016); Osiris (06.06.2016)	NA	NA	208	NA	c3_158_4B2
c3_158_4B3	c3	CH CAMEDO	158	4	B	Switzerland	Eschikon field station	04.07.2016	2016	Input (Bayer, 06.04.2016); Aviator Xpro (Bayer, 25.05.2016); Osiris (06.06.2016)	NA	NA	208	NA	c3_158_4B3
c3_158_5A1	c3	CH CAMEDO	158	5	A	Switzerland	Eschikon field station	04.07.2016	2016	Input (Bayer, 06.04.2016); Aviator Xpro (Bayer, 25.05.2016); Osiris (06.06.2016)	NA	NA	1157	YES	c3_158_5A1
c3_158_5A2	c3	CH CAMEDO	158	5	A	Switzerland	Eschikon field station	04.07.2016	2016	Input (Bayer, 06.04.2016); Aviator Xpro (Bayer, 25.05.2016); Osiris (06.06.2016)	NA	NA	1182	NA	c3_158_5A2
c3_158_5A3	c3	CH CAMEDO	158	5	A	Switzerland	Eschikon field station	04.07.2016	2016	Input (Bayer, 06.04.2016); Aviator Xpro (Bayer, 25.05.2016); Osiris (06.06.2016)	NA	NA	1227	NA	c3_158_5A3
c3_158_6A1	c3	CH CAMEDO	158	6	A	Switzerland	Eschikon field station	04.07.2016	2016	Input (Bayer, 06.04.2016); Aviator Xpro (Bayer, 25.05.2016); Osiris (06.06.2016)	NA	NA	260	YES	c3_158_6A1
c3_158_6B1	c3	CH CAMEDO	158	6	B	Switzerland	Eschikon field station	04.07.2016	2016	Input (Bayer, 06.04.2016); Aviator Xpro (Bayer, 25.05.2016); Osiris (06.06.2016)	NA	NA	1128	YES	c3_158_6B1
c3_158_6B2	c3	CH CAMEDO	158	6	B	Switzerland	Eschikon field station	04.07.2016	2016	Input (Bayer, 06.04.2016); Aviator Xpro (Bayer, 25.05.2016); Osiris (06.06.2016)	NA	NA	1094	NA	c3_158_6B2
c3_158_6B3	c3	CH CAMEDO	158	6	B	Switzerland	Eschikon field station	04.07.2016	2016	Input (Bayer, 06.04.2016); Aviator Xpro (Bayer, 25.05.2016); Osiris (06.06.2016)	NA	NA	1094	NA	c3_158_6B3
c3_158_8B1	c3	CH CAMEDO	158	8	B	Switzerland	Eschikon field station	04.07.2016	2016	Input (Bayer, 06.04.2016); Aviator Xpro (Bayer, 25.05.2016); Osiris (06.06.2016)	NA	NA	1400	YES	c3_158_8B1
c3_158_9A2	c3	CH CAMEDO	158	9	A	Switzerland	Eschikon field station	04.07.2016	2016	Input (Bayer, 06.04.2016); Aviator Xpro (Bayer, 25.05.2016); Osiris (06.06.2016)	NA	NA	841	NA	c3_158_9A2
c3_158_9C1	c3	CH CAMEDO	158	9	C	Switzerland	Eschikon field station	04.07.2016	2016	Input (Bayer, 06.04.2016); Aviator Xpro (Bayer, 25.05.2016); Osiris (06.06.2016)	NA	NA	1292	YES	c3_158_9C1
c3_158_9C3	c3	CH CAMEDO	158	9	C	Switzerland	Eschikon field station	04.07.2016	2016	Input (Bayer, 06.04.2016); Aviator Xpro (Bayer, 25.05.2016); Osiris (06.06.2016)	NA	NA	1278	NA	c3_158_9C3
c3_18_13J1	c3	MARCHEVAL	18	13	J	Switzerland	Eschikon field station	04.07.2016	2016	Input (Bayer, 06.04.2016); Aviator Xpro (Bayer, 25.05.2016); Osiris (06.06.2016)	NA	NA	1539	NA	c3_18_13J1
c3_18_13K1	c3	MARCHEVAL	18	13	K	Switzerland	Eschikon field station	04.07.2016	2016	Input (Bayer, 06.04.2016); Aviator Xpro (Bayer, 25.05.2016); Osiris (06.06.2016)	NA	NA	862	NA	c3_18_13K1
c3_18_14H1	c3	MARCHEVAL	18	14	H	Switzerland	Eschikon field station	04.07.2016	2016	Input (Bayer, 06.04.2016); Aviator Xpro (Bayer, 25.05.2016); Osiris (06.06.2016)	NA	NA	1469	NA	c3_18_14H1
c3_18_14J1	c3	MARCHEVAL	18	14	J	Switzerland	Eschikon field station	04.07.2016	2016	Input (Bayer, 06.04.2016); Aviator Xpro (Bayer, 25.05.2016); Osiris (06.06.2016)	NA	NA	83	NA	c3_18_14J1
c3_18_14K1	c3	MARCHEVAL	18	14	K	Switzerland	Eschikon field station	04.07.2016	2016	Input (Bayer, 06.04.2016); Aviator Xpro (Bayer, 25.05.2016); Osiris (06.06.2016)	NA	NA	749	NA	c3_18_14K1
c3_18_14K2	c3	MARCHEVAL	18	14	K	Switzerland	Eschikon field station	04.07.2016	2016	Input (Bayer, 06.04.2016); Aviator Xpro (Bayer, 25.05.2016); Osiris (06.06.2016)	NA	NA	750	NA	c3_18_14K2
c3_18_14L1	c3	MARCHEVAL	18	14	L	Switzerland	Eschikon field station	04.07.2016	2016	Input (Bayer, 06.04.2016); Aviator Xpro (Bayer, 25.05.2016); Osiris (06.06.2016)	NA	NA	760	NA	c3_18_14L1
c3_18_15K1	c3	MARCHEVAL	18	15	K	Switzerland	Eschikon field station	04.07.2016	2016	Input (Bayer, 06.04.2016); Aviator Xpro (Bayer, 25.05.2016); Osiris (06.06.2016)	NA	NA	721	NA	c3_18_15K1
c3_18_15L1	c3	MARCHEVAL	18	15	L	Switzerland	Eschikon field station	04.07.2016	2016	Input (Bayer, 06.04.2016); Aviator Xpro (Bayer, 25.05.2016); Osiris (06.06.2016)	NA	NA	749	NA	c3_18_15L1
c3_18_1H1	c3	MARCHEVAL	18	1	H	Switzerland	Eschikon field station	04.07.2016	2016	Input (Bayer, 06.04.2016); Aviator Xpro (Bayer, 25.05.2016); Osiris (06.06.2016)	NA	NA	1179	NA	c3_18_1H1
c3_18_1H2	c3	MARCHEVAL	18	1	H	Switzerland	Eschikon field station	04.07.2016	2016	Input (Bayer, 06.04.2016); Aviator Xpro (Bayer, 25.05.2016); Osiris (06.06.2016)	NA	NA	1198	NA	c3_18_1H2
c3_18_2K1	c3	MARCHEVAL	18	2	K	Switzerland	Eschikon field station	04.07.2016	2016	Input (Bayer, 06.04.2016); Aviator Xpro (Bayer, 25.05.2016); Osiris (06.06.2016)	NA	NA	1364	NA	c3_18_2K1
c3_18_2K2	c3	MARCHEVAL	18	2	K	Switzerland	Eschikon field station	04.07.2016	2016	Input (Bayer, 06.04.2016); Aviator Xpro (Bayer, 25.05.2016); Osiris (06.06.2016)	NA	NA	1354	NA	c3_18_2K2
c3_18_5K1	c3	MARCHEVAL	18	5	K	Switzerland	Eschikon field station	04.07.2016	2016	Input (Bayer, 06.04.2016); Aviator Xpro (Bayer, 25.05.2016); Osiris (06.06.2016)	NA	NA	1323	NA	c3_18_5K1
c3_18_7J1	c3	MARCHEVAL	18	7	J	Switzerland	Eschikon field station	04.07.2016	2016	Input (Bayer, 06.04.2016); Aviator Xpro (Bayer, 25.05.2016); Osiris (06.06.2016)	NA	NA	135	NA	c3_18_7J1
c3_2_10B1	c3	RUNAL	2	10	B	Switzerland	Eschikon field station	04.07.2016	2016	Input (Bayer, 06.04.2016); Aviator Xpro (Bayer, 25.05.2016); Osiris (06.06.2016)	ST16CH_3A31	SRR10728744	1222	YES	c3_2_10B1
c3_2_10B3	c3	RUNAL	2	10	B	Switzerland	Eschikon field station	04.07.2016	2016	Input (Bayer, 06.04.2016); Aviator Xpro (Bayer, 25.05.2016); Osiris (06.06.2016)	NA	NA	1102	YES	c3_2_10B3
c3_2_10C1	c3	RUNAL	2	10	C	Switzerland	Eschikon field station	04.07.2016	2016	Input (Bayer, 06.04.2016); Aviator Xpro (Bayer, 25.05.2016); Osiris (06.06.2016)	NA	NA	860	YES	c3_2_10C1
c3_2_11B2	c3	RUNAL	2	11	B	Switzerland	Eschikon field station	04.07.2016	2016	Input (Bayer, 06.04.2016); Aviator Xpro (Bayer, 25.05.2016); Osiris (06.06.2016)	NA	NA	1577	YES	c3_2_11B2
c3_2_11B3	c3	RUNAL	2	11	B	Switzerland	Eschikon field station	04.07.2016	2016	Input (Bayer, 06.04.2016); Aviator Xpro (Bayer, 25.05.2016); Osiris (06.06.2016)	NA	NA	1576	YES	c3_2_11B3
c3_2_12A2	c3	RUNAL	2	12	A	Switzerland	Eschikon field station	04.07.2016	2016	Input (Bayer, 06.04.2016); Aviator Xpro (Bayer, 25.05.2016); Osiris (06.06.2016)	ST16CH_3A36	SRR10728743	933	NA	c3_2_12A2
c3_2_13A2	c3	RUNAL	2	13	A	Switzerland	Eschikon field station	04.07.2016	2016	Input (Bayer, 06.04.2016); Aviator Xpro (Bayer, 25.05.2016); Osiris (06.06.2016)	NA	NA	190	YES	c3_2_13A2
c3_2_13A3	c3	RUNAL	2	13	A	Switzerland	Eschikon field station	04.07.2016	2016	Input (Bayer, 06.04.2016); Aviator Xpro (Bayer, 25.05.2016); Osiris (06.06.2016)	NA	NA	71	NA	c3_2_13A3
c3_2_14A1	c3	RUNAL	2	14	A	Switzerland	Eschikon field station	04.07.2016	2016	Input (Bayer, 06.04.2016); Aviator Xpro (Bayer, 25.05.2016); Osiris (06.06.2016)	NA	NA	1417	YES	c3_2_14A1
c3_2_14A2	c3	RUNAL	2	14	A	Switzerland	Eschikon field station	04.07.2016	2016	Input (Bayer, 06.04.2016); Aviator Xpro (Bayer, 25.05.2016); Osiris (06.06.2016)	NA	NA	1430	YES	c3_2_14A2
c3_2_14B2	c3	RUNAL	2	14	B	Switzerland	Eschikon field station	04.07.2016	2016	Input (Bayer, 06.04.2016); Aviator Xpro (Bayer, 25.05.2016); Osiris (06.06.2016)	NA	NA	1002	YES	c3_2_14B2
c3_2_14B3	c3	RUNAL	2	14	B	Switzerland	Eschikon field station	04.07.2016	2016	Input (Bayer, 06.04.2016); Aviator Xpro (Bayer, 25.05.2016); Osiris (06.06.2016)	NA	NA	604	NA	c3_2_14B3
c3_2_15A1	c3	RUNAL	2	15	A	Switzerland	Eschikon field station	04.07.2016	2016	Input (Bayer, 06.04.2016); Aviator Xpro (Bayer, 25.05.2016); Osiris (06.06.2016)	NA	NA	1358	YES	c3_2_15A1
c3_2_15A2	c3	RUNAL	2	15	A	Switzerland	Eschikon field station	04.07.2016	2016	Input (Bayer, 06.04.2016); Aviator Xpro (Bayer, 25.05.2016); Osiris (06.06.2016)	NA	NA	1361	NA	c3_2_15A2
c3_2_15B1	c3	RUNAL	2	15	B	Switzerland	Eschikon field station	04.07.2016	2016	Input (Bayer, 06.04.2016); Aviator Xpro (Bayer, 25.05.2016); Osiris (06.06.2016)	NA	NA	1357	NA	c3_2_15B1
c3_2_15B2	c3	RUNAL	2	15	B	Switzerland	Eschikon field station	04.07.2016	2016	Input (Bayer, 06.04.2016); Aviator Xpro (Bayer, 25.05.2016); Osiris (06.06.2016)	NA	NA	1361	NA	c3_2_15B2
c3_2_15B3	c3	RUNAL	2	15	B	Switzerland	Eschikon field station	04.07.2016	2016	Input (Bayer, 06.04.2016); Aviator Xpro (Bayer, 25.05.2016); Osiris (06.06.2016)	NA	NA	1361	NA	c3_2_15B3
c3_2_16A1	c3	RUNAL	2	16	A	Switzerland	Eschikon field station	04.07.2016	2016	Input (Bayer, 06.04.2016); Aviator Xpro (Bayer, 25.05.2016); Osiris (06.06.2016)	NA	NA	642	YES	c3_2_16A1
c3_2_16B1	c3	RUNAL	2	16	B	Switzerland	Eschikon field station	04.07.2016	2016	Input (Bayer, 06.04.2016); Aviator Xpro (Bayer, 25.05.2016); Osiris (06.06.2016)	NA	NA	1418	NA	c3_2_16B1
c3_2_16B2	c3	RUNAL	2	16	B	Switzerland	Eschikon field station	04.07.2016	2016	Input (Bayer, 06.04.2016); Aviator Xpro (Bayer, 25.05.2016); Osiris (06.06.2016)	NA	NA	1324	YES	c3_2_16B2
c3_2_16B3	c3	RUNAL	2	16	B	Switzerland	Eschikon field station	04.07.2016	2016	Input (Bayer, 06.04.2016); Aviator Xpro (Bayer, 25.05.2016); Osiris (06.06.2016)	ST16CH_3A51	SRR10728742	1192	YES	c3_2_16B3
c3_2_1A2	c3	RUNAL	2	1	A	Switzerland	Eschikon field station	04.07.2016	2016	Input (Bayer, 06.04.2016); Aviator Xpro (Bayer, 25.05.2016); Osiris (06.06.2016)	NA	NA	531	NA	c3_2_1A2
c3_2_1B2	c3	RUNAL	2	1	B	Switzerland	Eschikon field station	04.07.2016	2016	Input (Bayer, 06.04.2016); Aviator Xpro (Bayer, 25.05.2016); Osiris (06.06.2016)	NA	NA	901	YES	c3_2_1B2
c3_2_1B3	c3	RUNAL	2	1	B	Switzerland	Eschikon field station	04.07.2016	2016	Input (Bayer, 06.04.2016); Aviator Xpro (Bayer, 25.05.2016); Osiris (06.06.2016)	NA	NA	1233	NA	c3_2_1B3
c3_2_2A1	c3	RUNAL	2	2	A	Switzerland	Eschikon field station	04.07.2016	2016	Input (Bayer, 06.04.2016); Aviator Xpro (Bayer, 25.05.2016); Osiris (06.06.2016)	NA	NA	531	NA	c3_2_2A1
c3_2_2A3	c3	RUNAL	2	2	A	Switzerland	Eschikon field station	04.07.2016	2016	Input (Bayer, 06.04.2016); Aviator Xpro (Bayer, 25.05.2016); Osiris (06.06.2016)	NA	NA	538	NA	c3_2_2A3
c3_2_2B1	c3	RUNAL	2	2	B	Switzerland	Eschikon field station	04.07.2016	2016	Input (Bayer, 06.04.2016); Aviator Xpro (Bayer, 25.05.2016); Osiris (06.06.2016)	NA	NA	1099	YES	c3_2_2B1
c3_2_2B2	c3	RUNAL	2	2	B	Switzerland	Eschikon field station	04.07.2016	2016	Input (Bayer, 06.04.2016); Aviator Xpro (Bayer, 25.05.2016); Osiris (06.06.2016)	NA	NA	985	YES	c3_2_2B2
c3_2_3A1	c3	RUNAL	2	3	A	Switzerland	Eschikon field station	04.07.2016	2016	Input (Bayer, 06.04.2016); Aviator Xpro (Bayer, 25.05.2016); Osiris (06.06.2016)	NA	NA	639	YES	c3_2_3A1
c3_2_3A2	c3	RUNAL	2	3	A	Switzerland	Eschikon field station	04.07.2016	2016	Input (Bayer, 06.04.2016); Aviator Xpro (Bayer, 25.05.2016); Osiris (06.06.2016)	NA	NA	620	NA	c3_2_3A2
c3_2_3A3	c3	RUNAL	2	3	A	Switzerland	Eschikon field station	04.07.2016	2016	Input (Bayer, 06.04.2016); Aviator Xpro (Bayer, 25.05.2016); Osiris (06.06.2016)	NA	NA	707	YES	c3_2_3A3
c3_2_3B1	c3	RUNAL	2	3	B	Switzerland	Eschikon field station	04.07.2016	2016	Input (Bayer, 06.04.2016); Aviator Xpro (Bayer, 25.05.2016); Osiris (06.06.2016)	NA	NA	1337	YES	c3_2_3B1
c3_2_3B2	c3	RUNAL	2	3	B	Switzerland	Eschikon field station	04.07.2016	2016	Input (Bayer, 06.04.2016); Aviator Xpro (Bayer, 25.05.2016); Osiris (06.06.2016)	NA	NA	990	NA	c3_2_3B2
c3_2_4A1	c3	RUNAL	2	4	A	Switzerland	Eschikon field station	04.07.2016	2016	Input (Bayer, 06.04.2016); Aviator Xpro (Bayer, 25.05.2016); Osiris (06.06.2016)	NA	NA	889	YES	c3_2_4A1
c3_2_4A3	c3	RUNAL	2	4	A	Switzerland	Eschikon field station	04.07.2016	2016	Input (Bayer, 06.04.2016); Aviator Xpro (Bayer, 25.05.2016); Osiris (06.06.2016)	ST16CH_3A16	SRR10728745	1469	YES	c3_2_4A3
c3_2_4B1	c3	RUNAL	2	4	B	Switzerland	Eschikon field station	04.07.2016	2016	Input (Bayer, 06.04.2016); Aviator Xpro (Bayer, 25.05.2016); Osiris (06.06.2016)	NA	NA	881	NA	c3_2_4B1
c3_2_4B2	c3	RUNAL	2	4	B	Switzerland	Eschikon field station	04.07.2016	2016	Input (Bayer, 06.04.2016); Aviator Xpro (Bayer, 25.05.2016); Osiris (06.06.2016)	NA	NA	888	NA	c3_2_4B2
c3_2_5A2	c3	RUNAL	2	5	A	Switzerland	Eschikon field station	04.07.2016	2016	Input (Bayer, 06.04.2016); Aviator Xpro (Bayer, 25.05.2016); Osiris (06.06.2016)	NA	NA	1529	YES	c3_2_5A2
c3_2_5B2	c3	RUNAL	2	5	B	Switzerland	Eschikon field station	04.07.2016	2016	Input (Bayer, 06.04.2016); Aviator Xpro (Bayer, 25.05.2016); Osiris (06.06.2016)	NA	NA	877	YES	c3_2_5B2
c3_2_6A1	c3	RUNAL	2	6	A	Switzerland	Eschikon field station	04.07.2016	2016	Input (Bayer, 06.04.2016); Aviator Xpro (Bayer, 25.05.2016); Osiris (06.06.2016)	NA	NA	328	YES	c3_2_6A1
c3_2_6A3	c3	RUNAL	2	6	A	Switzerland	Eschikon field station	04.07.2016	2016	Input (Bayer, 06.04.2016); Aviator Xpro (Bayer, 25.05.2016); Osiris (06.06.2016)	NA	NA	329	YES	c3_2_6A3
c3_2_6B1	c3	RUNAL	2	6	B	Switzerland	Eschikon field station	04.07.2016	2016	Input (Bayer, 06.04.2016); Aviator Xpro (Bayer, 25.05.2016); Osiris (06.06.2016)	NA	NA	1211	YES	c3_2_6B1
c3_2_6B3	c3	RUNAL	2	6	B	Switzerland	Eschikon field station	04.07.2016	2016	Input (Bayer, 06.04.2016); Aviator Xpro (Bayer, 25.05.2016); Osiris (06.06.2016)	NA	NA	1478	YES	c3_2_6B3
c3_2_8A1	c3	RUNAL	2	8	A	Switzerland	Eschikon field station	04.07.2016	2016	Input (Bayer, 06.04.2016); Aviator Xpro (Bayer, 25.05.2016); Osiris (06.06.2016)	NA	NA	861	NA	c3_2_8A1
c3_2_8A3	c3	RUNAL	2	8	A	Switzerland	Eschikon field station	04.07.2016	2016	Input (Bayer, 06.04.2016); Aviator Xpro (Bayer, 25.05.2016); Osiris (06.06.2016)	NA	NA	1055	YES	c3_2_8A3
c3_2_8B2	c3	RUNAL	2	8	B	Switzerland	Eschikon field station	04.07.2016	2016	Input (Bayer, 06.04.2016); Aviator Xpro (Bayer, 25.05.2016); Osiris (06.06.2016)	NA	NA	1003	YES	c3_2_8B2
c3_2_9A2	c3	RUNAL	2	9	A	Switzerland	Eschikon field station	04.07.2016	2016	Input (Bayer, 06.04.2016); Aviator Xpro (Bayer, 25.05.2016); Osiris (06.06.2016)	NA	NA	658	YES	c3_2_9A2
c3_2_9B2	c3	RUNAL	2	9	B	Switzerland	Eschikon field station	04.07.2016	2016	Input (Bayer, 06.04.2016); Aviator Xpro (Bayer, 25.05.2016); Osiris (06.06.2016)	NA	NA	660	YES	c3_2_9B2
c3_237_10A3	c3	SIMANO	237	10	A	Switzerland	Eschikon field station	04.07.2016	2016	Input (Bayer, 06.04.2016); Aviator Xpro (Bayer, 25.05.2016); Osiris (06.06.2016)	NA	NA	1403	NA	c3_237_10A3
c3_237_10B1	c3	SIMANO	237	10	B	Switzerland	Eschikon field station	04.07.2016	2016	Input (Bayer, 06.04.2016); Aviator Xpro (Bayer, 25.05.2016); Osiris (06.06.2016)	NA	NA	955	YES	c3_237_10B1
c3_237_10B3	c3	SIMANO	237	10	B	Switzerland	Eschikon field station	04.07.2016	2016	Input (Bayer, 06.04.2016); Aviator Xpro (Bayer, 25.05.2016); Osiris (06.06.2016)	NA	NA	1480	NA	c3_237_10B3
c3_237_12A2	c3	SIMANO	237	12	A	Switzerland	Eschikon field station	04.07.2016	2016	Input (Bayer, 06.04.2016); Aviator Xpro (Bayer, 25.05.2016); Osiris (06.06.2016)	NA	NA	846	YES	c3_237_12A2
c3_237_13A1	c3	SIMANO	237	13	A	Switzerland	Eschikon field station	04.07.2016	2016	Input (Bayer, 06.04.2016); Aviator Xpro (Bayer, 25.05.2016); Osiris (06.06.2016)	NA	NA	267	YES	c3_237_13A1
c3_237_13A2	c3	SIMANO	237	13	A	Switzerland	Eschikon field station	04.07.2016	2016	Input (Bayer, 06.04.2016); Aviator Xpro (Bayer, 25.05.2016); Osiris (06.06.2016)	NA	NA	257	NA	c3_237_13A2
c3_237_13B2	c3	SIMANO	237	13	B	Switzerland	Eschikon field station	04.07.2016	2016	Input (Bayer, 06.04.2016); Aviator Xpro (Bayer, 25.05.2016); Osiris (06.06.2016)	NA	NA	209	YES	c3_237_13B2
c3_237_15A1	c3	SIMANO	237	15	A	Switzerland	Eschikon field station	04.07.2016	2016	Input (Bayer, 06.04.2016); Aviator Xpro (Bayer, 25.05.2016); Osiris (06.06.2016)	NA	NA	1227	NA	c3_237_15A1
c3_237_15A2	c3	SIMANO	237	15	A	Switzerland	Eschikon field station	04.07.2016	2016	Input (Bayer, 06.04.2016); Aviator Xpro (Bayer, 25.05.2016); Osiris (06.06.2016)	NA	NA	1014	NA	c3_237_15A2
c3_237_15B1	c3	SIMANO	237	15	B	Switzerland	Eschikon field station	04.07.2016	2016	Input (Bayer, 06.04.2016); Aviator Xpro (Bayer, 25.05.2016); Osiris (06.06.2016)	ST16CH_3L27	SRR10728704	816	NA	c3_237_15B1
c3_237_16A1	c3	SIMANO	237	16	A	Switzerland	Eschikon field station	04.07.2016	2016	Input (Bayer, 06.04.2016); Aviator Xpro (Bayer, 25.05.2016); Osiris (06.06.2016)	NA	NA	1518	NA	c3_237_16A1
c3_237_16B1	c3	SIMANO	237	16	B	Switzerland	Eschikon field station	04.07.2016	2016	Input (Bayer, 06.04.2016); Aviator Xpro (Bayer, 25.05.2016); Osiris (06.06.2016)	NA	NA	852	NA	c3_237_16B1
c3_237_16B2	c3	SIMANO	237	16	B	Switzerland	Eschikon field station	04.07.2016	2016	Input (Bayer, 06.04.2016); Aviator Xpro (Bayer, 25.05.2016); Osiris (06.06.2016)	NA	NA	852	NA	c3_237_16B2
c3_237_16B3	c3	SIMANO	237	16	B	Switzerland	Eschikon field station	04.07.2016	2016	Input (Bayer, 06.04.2016); Aviator Xpro (Bayer, 25.05.2016); Osiris (06.06.2016)	NA	NA	899	YES	c3_237_16B3
c3_237_1B1	c3	SIMANO	237	1	B	Switzerland	Eschikon field station	04.07.2016	2016	Input (Bayer, 06.04.2016); Aviator Xpro (Bayer, 25.05.2016); Osiris (06.06.2016)	NA	NA	920	YES	c3_237_1B1
c3_237_2A2	c3	SIMANO	237	2	A	Switzerland	Eschikon field station	04.07.2016	2016	Input (Bayer, 06.04.2016); Aviator Xpro (Bayer, 25.05.2016); Osiris (06.06.2016)	ST16CH_3L2	SRR10728705	926	NA	c3_237_2A2
c3_237_2A3	c3	SIMANO	237	2	A	Switzerland	Eschikon field station	04.07.2016	2016	Input (Bayer, 06.04.2016); Aviator Xpro (Bayer, 25.05.2016); Osiris (06.06.2016)	NA	NA	925	YES	c3_237_2A3
c3_237_3A2	c3	SIMANO	237	3	A	Switzerland	Eschikon field station	04.07.2016	2016	Input (Bayer, 06.04.2016); Aviator Xpro (Bayer, 25.05.2016); Osiris (06.06.2016)	NA	NA	1469	NA	c3_237_3A2
c3_237_3B1	c3	SIMANO	237	3	B	Switzerland	Eschikon field station	04.07.2016	2016	Input (Bayer, 06.04.2016); Aviator Xpro (Bayer, 25.05.2016); Osiris (06.06.2016)	NA	NA	1535	YES	c3_237_3B1
c3_237_4A2	c3	SIMANO	237	4	A	Switzerland	Eschikon field station	04.07.2016	2016	Input (Bayer, 06.04.2016); Aviator Xpro (Bayer, 25.05.2016); Osiris (06.06.2016)	NA	NA	1255	YES	c3_237_4A2
c3_237_4A3	c3	SIMANO	237	4	A	Switzerland	Eschikon field station	04.07.2016	2016	Input (Bayer, 06.04.2016); Aviator Xpro (Bayer, 25.05.2016); Osiris (06.06.2016)	NA	NA	1293	YES	c3_237_4A3
c3_237_5B1	c3	SIMANO	237	5	B	Switzerland	Eschikon field station	04.07.2016	2016	Input (Bayer, 06.04.2016); Aviator Xpro (Bayer, 25.05.2016); Osiris (06.06.2016)	NA	NA	286	YES	c3_237_5B1
c3_237_6A3	c3	SIMANO	237	6	A	Switzerland	Eschikon field station	04.07.2016	2016	Input (Bayer, 06.04.2016); Aviator Xpro (Bayer, 25.05.2016); Osiris (06.06.2016)	NA	NA	994	NA	c3_237_6A3
c3_237_8A1	c3	SIMANO	237	8	A	Switzerland	Eschikon field station	04.07.2016	2016	Input (Bayer, 06.04.2016); Aviator Xpro (Bayer, 25.05.2016); Osiris (06.06.2016)	NA	NA	1396	YES	c3_237_8A1
c3_237_8A2	c3	SIMANO	237	8	A	Switzerland	Eschikon field station	04.07.2016	2016	Input (Bayer, 06.04.2016); Aviator Xpro (Bayer, 25.05.2016); Osiris (06.06.2016)	NA	NA	1395	YES	c3_237_8A2
c3_237_8B1	c3	SIMANO	237	8	B	Switzerland	Eschikon field station	04.07.2016	2016	Input (Bayer, 06.04.2016); Aviator Xpro (Bayer, 25.05.2016); Osiris (06.06.2016)	NA	NA	1213	YES	c3_237_8B1
c3_237_8B2	c3	SIMANO	237	8	B	Switzerland	Eschikon field station	04.07.2016	2016	Input (Bayer, 06.04.2016); Aviator Xpro (Bayer, 25.05.2016); Osiris (06.06.2016)	NA	NA	828	YES	c3_237_8B2
c3_237_8B3	c3	SIMANO	237	8	B	Switzerland	Eschikon field station	04.07.2016	2016	Input (Bayer, 06.04.2016); Aviator Xpro (Bayer, 25.05.2016); Osiris (06.06.2016)	NA	NA	894	YES	c3_237_8B3
c3_237_9A3	c3	SIMANO	237	9	A	Switzerland	Eschikon field station	04.07.2016	2016	Input (Bayer, 06.04.2016); Aviator Xpro (Bayer, 25.05.2016); Osiris (06.06.2016)	NA	NA	1544	YES	c3_237_9A3
c3_237_9B1	c3	SIMANO	237	9	B	Switzerland	Eschikon field station	04.07.2016	2016	Input (Bayer, 06.04.2016); Aviator Xpro (Bayer, 25.05.2016); Osiris (06.06.2016)	NA	NA	752	YES	c3_237_9B1
c3_237_9B2	c3	SIMANO	237	9	B	Switzerland	Eschikon field station	04.07.2016	2016	Input (Bayer, 06.04.2016); Aviator Xpro (Bayer, 25.05.2016); Osiris (06.06.2016)	NA	NA	722	NA	c3_237_9B2
c3_25_10A1	c3	CH CLARO	25	10	A	Switzerland	Eschikon field station	04.07.2016	2016	Input (Bayer, 06.04.2016); Aviator Xpro (Bayer, 25.05.2016); Osiris (06.06.2016)	NA	NA	1272	YES	c3_25_10A1
c3_25_10B2	c3	CH CLARO	25	10	B	Switzerland	Eschikon field station	04.07.2016	2016	Input (Bayer, 06.04.2016); Aviator Xpro (Bayer, 25.05.2016); Osiris (06.06.2016)	ST16CH_3C23	SRR10728737	183	NA	c3_25_10B2
c3_25_10B3	c3	CH CLARO	25	10	B	Switzerland	Eschikon field station	04.07.2016	2016	Input (Bayer, 06.04.2016); Aviator Xpro (Bayer, 25.05.2016); Osiris (06.06.2016)	NA	NA	100	NA	c3_25_10B3
c3_25_10C1	c3	CH CLARO	25	10	C	Switzerland	Eschikon field station	04.07.2016	2016	Input (Bayer, 06.04.2016); Aviator Xpro (Bayer, 25.05.2016); Osiris (06.06.2016)	NA	NA	929	YES	c3_25_10C1
c3_25_10C2	c3	CH CLARO	25	10	C	Switzerland	Eschikon field station	04.07.2016	2016	Input (Bayer, 06.04.2016); Aviator Xpro (Bayer, 25.05.2016); Osiris (06.06.2016)	NA	NA	182	NA	c3_25_10C2
c3_25_10C3	c3	CH CLARO	25	10	C	Switzerland	Eschikon field station	04.07.2016	2016	Input (Bayer, 06.04.2016); Aviator Xpro (Bayer, 25.05.2016); Osiris (06.06.2016)	NA	NA	217	NA	c3_25_10C3
c3_25_11A1	c3	CH CLARO	25	11	A	Switzerland	Eschikon field station	04.07.2016	2016	Input (Bayer, 06.04.2016); Aviator Xpro (Bayer, 25.05.2016); Osiris (06.06.2016)	NA	NA	1365	YES	c3_25_11A1
c3_25_11A2	c3	CH CLARO	25	11	A	Switzerland	Eschikon field station	04.07.2016	2016	Input (Bayer, 06.04.2016); Aviator Xpro (Bayer, 25.05.2016); Osiris (06.06.2016)	NA	NA	1375	NA	c3_25_11A2
c3_25_11A3	c3	CH CLARO	25	11	A	Switzerland	Eschikon field station	04.07.2016	2016	Input (Bayer, 06.04.2016); Aviator Xpro (Bayer, 25.05.2016); Osiris (06.06.2016)	NA	NA	1372	NA	c3_25_11A3
c3_25_11A4	c3	CH CLARO	25	11	A	Switzerland	Eschikon field station	04.07.2016	2016	Input (Bayer, 06.04.2016); Aviator Xpro (Bayer, 25.05.2016); Osiris (06.06.2016)	NA	NA	1365	NA	c3_25_11A4
c3_25_11B2	c3	CH CLARO	25	11	B	Switzerland	Eschikon field station	04.07.2016	2016	Input (Bayer, 06.04.2016); Aviator Xpro (Bayer, 25.05.2016); Osiris (06.06.2016)	NA	NA	896	YES	c3_25_11B2
c3_25_12A1	c3	CH CLARO	25	12	A	Switzerland	Eschikon field station	04.07.2016	2016	Input (Bayer, 06.04.2016); Aviator Xpro (Bayer, 25.05.2016); Osiris (06.06.2016)	NA	NA	1540	NA	c3_25_12A1
c3_25_12A2	c3	CH CLARO	25	12	A	Switzerland	Eschikon field station	04.07.2016	2016	Input (Bayer, 06.04.2016); Aviator Xpro (Bayer, 25.05.2016); Osiris (06.06.2016)	NA	NA	1541	YES	c3_25_12A2
c3_25_12B3	c3	CH CLARO	25	12	B	Switzerland	Eschikon field station	04.07.2016	2016	Input (Bayer, 06.04.2016); Aviator Xpro (Bayer, 25.05.2016); Osiris (06.06.2016)	NA	NA	320	YES	c3_25_12B3
c3_25_13A2	c3	CH CLARO	25	13	A	Switzerland	Eschikon field station	04.07.2016	2016	Input (Bayer, 06.04.2016); Aviator Xpro (Bayer, 25.05.2016); Osiris (06.06.2016)	NA	NA	1175	NA	c3_25_13A2
c3_25_13A3	c3	CH CLARO	25	13	A	Switzerland	Eschikon field station	04.07.2016	2016	Input (Bayer, 06.04.2016); Aviator Xpro (Bayer, 25.05.2016); Osiris (06.06.2016)	NA	NA	1197	YES	c3_25_13A3
c3_25_13B1	c3	CH CLARO	25	13	B	Switzerland	Eschikon field station	04.07.2016	2016	Input (Bayer, 06.04.2016); Aviator Xpro (Bayer, 25.05.2016); Osiris (06.06.2016)	NA	NA	900	YES	c3_25_13B1
c3_25_14A2	c3	CH CLARO	25	14	A	Switzerland	Eschikon field station	04.07.2016	2016	Input (Bayer, 06.04.2016); Aviator Xpro (Bayer, 25.05.2016); Osiris (06.06.2016)	NA	NA	781	YES	c3_25_14A2
c3_25_14B2	c3	CH CLARO	25	14	B	Switzerland	Eschikon field station	04.07.2016	2016	Input (Bayer, 06.04.2016); Aviator Xpro (Bayer, 25.05.2016); Osiris (06.06.2016)	NA	NA	655	YES	c3_25_14B2
c3_25_14B3	c3	CH CLARO	25	14	B	Switzerland	Eschikon field station	04.07.2016	2016	Input (Bayer, 06.04.2016); Aviator Xpro (Bayer, 25.05.2016); Osiris (06.06.2016)	NA	NA	516	NA	c3_25_14B3
c3_25_16A1	c3	CH CLARO	25	16	A	Switzerland	Eschikon field station	04.07.2016	2016	Input (Bayer, 06.04.2016); Aviator Xpro (Bayer, 25.05.2016); Osiris (06.06.2016)	NA	NA	622	NA	c3_25_16A1
c3_25_16A2	c3	CH CLARO	25	16	A	Switzerland	Eschikon field station	04.07.2016	2016	Input (Bayer, 06.04.2016); Aviator Xpro (Bayer, 25.05.2016); Osiris (06.06.2016)	NA	NA	541	NA	c3_25_16A2
c3_25_16B1	c3	CH CLARO	25	16	B	Switzerland	Eschikon field station	04.07.2016	2016	Input (Bayer, 06.04.2016); Aviator Xpro (Bayer, 25.05.2016); Osiris (06.06.2016)	NA	NA	1252	YES	c3_25_16B1
c3_25_16B2	c3	CH CLARO	25	16	B	Switzerland	Eschikon field station	04.07.2016	2016	Input (Bayer, 06.04.2016); Aviator Xpro (Bayer, 25.05.2016); Osiris (06.06.2016)	NA	NA	1251	NA	c3_25_16B2
c3_25_16B3	c3	CH CLARO	25	16	B	Switzerland	Eschikon field station	04.07.2016	2016	Input (Bayer, 06.04.2016); Aviator Xpro (Bayer, 25.05.2016); Osiris (06.06.2016)	NA	NA	1302	NA	c3_25_16B3
c3_25_1A3	c3	CH CLARO	25	1	A	Switzerland	Eschikon field station	04.07.2016	2016	Input (Bayer, 06.04.2016); Aviator Xpro (Bayer, 25.05.2016); Osiris (06.06.2016)	NA	NA	400	YES	c3_25_1A3
c3_25_1B1	c3	CH CLARO	25	1	B	Switzerland	Eschikon field station	04.07.2016	2016	Input (Bayer, 06.04.2016); Aviator Xpro (Bayer, 25.05.2016); Osiris (06.06.2016)	NA	NA	969	YES	c3_25_1B1
c3_25_2A1	c3	CH CLARO	25	2	A	Switzerland	Eschikon field station	04.07.2016	2016	Input (Bayer, 06.04.2016); Aviator Xpro (Bayer, 25.05.2016); Osiris (06.06.2016)	NA	NA	1172	NA	c3_25_2A1
c3_25_2A2	c3	CH CLARO	25	2	A	Switzerland	Eschikon field station	04.07.2016	2016	Input (Bayer, 06.04.2016); Aviator Xpro (Bayer, 25.05.2016); Osiris (06.06.2016)	NA	NA	873	YES	c3_25_2A2
c3_25_2A3	c3	CH CLARO	25	2	A	Switzerland	Eschikon field station	04.07.2016	2016	Input (Bayer, 06.04.2016); Aviator Xpro (Bayer, 25.05.2016); Osiris (06.06.2016)	NA	NA	872	NA	c3_25_2A3
c3_25_2B1	c3	CH CLARO	25	2	B	Switzerland	Eschikon field station	04.07.2016	2016	Input (Bayer, 06.04.2016); Aviator Xpro (Bayer, 25.05.2016); Osiris (06.06.2016)	ST16CH_3C6	SRR10728736	970	NA	c3_25_2B1
c3_25_2B2	c3	CH CLARO	25	2	B	Switzerland	Eschikon field station	04.07.2016	2016	Input (Bayer, 06.04.2016); Aviator Xpro (Bayer, 25.05.2016); Osiris (06.06.2016)	NA	NA	970	NA	c3_25_2B2
c3_25_3A3	c3	CH CLARO	25	3	A	Switzerland	Eschikon field station	04.07.2016	2016	Input (Bayer, 06.04.2016); Aviator Xpro (Bayer, 25.05.2016); Osiris (06.06.2016)	NA	NA	1514	YES	c3_25_3A3
c3_25_3B2	c3	CH CLARO	25	3	B	Switzerland	Eschikon field station	04.07.2016	2016	Input (Bayer, 06.04.2016); Aviator Xpro (Bayer, 25.05.2016); Osiris (06.06.2016)	NA	NA	520	NA	c3_25_3B2
c3_25_7A2	c3	CH CLARO	25	7	A	Switzerland	Eschikon field station	04.07.2016	2016	Input (Bayer, 06.04.2016); Aviator Xpro (Bayer, 25.05.2016); Osiris (06.06.2016)	NA	NA	1186	YES	c3_25_7A2
c3_25_7B1	c3	CH CLARO	25	7	B	Switzerland	Eschikon field station	04.07.2016	2016	Input (Bayer, 06.04.2016); Aviator Xpro (Bayer, 25.05.2016); Osiris (06.06.2016)	NA	NA	1401	YES	c3_25_7B1
c3_25_7B2	c3	CH CLARO	25	7	B	Switzerland	Eschikon field station	04.07.2016	2016	Input (Bayer, 06.04.2016); Aviator Xpro (Bayer, 25.05.2016); Osiris (06.06.2016)	NA	NA	1402	NA	c3_25_7B2
c3_25_7B3	c3	CH CLARO	25	7	B	Switzerland	Eschikon field station	04.07.2016	2016	Input (Bayer, 06.04.2016); Aviator Xpro (Bayer, 25.05.2016); Osiris (06.06.2016)	NA	NA	1578	NA	c3_25_7B3
c3_25_8A1	c3	CH CLARO	25	8	A	Switzerland	Eschikon field station	04.07.2016	2016	Input (Bayer, 06.04.2016); Aviator Xpro (Bayer, 25.05.2016); Osiris (06.06.2016)	NA	NA	953	YES	c3_25_8A1
c3_25_8A3	c3	CH CLARO	25	8	A	Switzerland	Eschikon field station	04.07.2016	2016	Input (Bayer, 06.04.2016); Aviator Xpro (Bayer, 25.05.2016); Osiris (06.06.2016)	NA	NA	574	NA	c3_25_8A3
c3_25_8B1	c3	CH CLARO	25	8	B	Switzerland	Eschikon field station	04.07.2016	2016	Input (Bayer, 06.04.2016); Aviator Xpro (Bayer, 25.05.2016); Osiris (06.06.2016)	NA	NA	346	YES	c3_25_8B1
c3_25_8B2	c3	CH CLARO	25	8	B	Switzerland	Eschikon field station	04.07.2016	2016	Input (Bayer, 06.04.2016); Aviator Xpro (Bayer, 25.05.2016); Osiris (06.06.2016)	NA	NA	863	NA	c3_25_8B2
c3_25_8B3	c3	CH CLARO	25	8	B	Switzerland	Eschikon field station	04.07.2016	2016	Input (Bayer, 06.04.2016); Aviator Xpro (Bayer, 25.05.2016); Osiris (06.06.2016)	NA	NA	945	NA	c3_25_8B3
c3_25_9A1	c3	CH CLARO	25	9	A	Switzerland	Eschikon field station	04.07.2016	2016	Input (Bayer, 06.04.2016); Aviator Xpro (Bayer, 25.05.2016); Osiris (06.06.2016)	ST16CH_3C19	SRR10728738	1528	NA	c3_25_9A1
c3_25_9A2	c3	CH CLARO	25	9	A	Switzerland	Eschikon field station	04.07.2016	2016	Input (Bayer, 06.04.2016); Aviator Xpro (Bayer, 25.05.2016); Osiris (06.06.2016)	NA	NA	1472	NA	c3_25_9A2
c3_25_9A3	c3	CH CLARO	25	9	A	Switzerland	Eschikon field station	04.07.2016	2016	Input (Bayer, 06.04.2016); Aviator Xpro (Bayer, 25.05.2016); Osiris (06.06.2016)	NA	NA	1472	NA	c3_25_9A3
c3_290_15J1	c3	HALDOR	290	15	J	Switzerland	Eschikon field station	04.07.2016	2016	Input (Bayer, 06.04.2016); Aviator Xpro (Bayer, 25.05.2016); Osiris (06.06.2016)	NA	NA	439	NA	c3_290_15J1
c3_335_10A1	c3	AUBUSSON	335	10	A	Switzerland	Eschikon field station	04.07.2016	2016	Input (Bayer, 06.04.2016); Aviator Xpro (Bayer, 25.05.2016); Osiris (06.06.2016)	NA	NA	218	YES	c3_335_10A1
c3_335_10A2	c3	AUBUSSON	335	10	A	Switzerland	Eschikon field station	04.07.2016	2016	Input (Bayer, 06.04.2016); Aviator Xpro (Bayer, 25.05.2016); Osiris (06.06.2016)	NA	NA	510	YES	c3_335_10A2
c3_335_10B1	c3	AUBUSSON	335	10	B	Switzerland	Eschikon field station	04.07.2016	2016	Input (Bayer, 06.04.2016); Aviator Xpro (Bayer, 25.05.2016); Osiris (06.06.2016)	NA	NA	206	NA	c3_335_10B1
c3_335_11A2	c3	AUBUSSON	335	11	A	Switzerland	Eschikon field station	04.07.2016	2016	Input (Bayer, 06.04.2016); Aviator Xpro (Bayer, 25.05.2016); Osiris (06.06.2016)	NA	NA	1543	YES	c3_335_11A2
c3_335_14B1	c3	AUBUSSON	335	14	B	Switzerland	Eschikon field station	04.07.2016	2016	Input (Bayer, 06.04.2016); Aviator Xpro (Bayer, 25.05.2016); Osiris (06.06.2016)	NA	NA	1376	YES	c3_335_14B1
c3_335_15A1	c3	AUBUSSON	335	15	A	Switzerland	Eschikon field station	04.07.2016	2016	Input (Bayer, 06.04.2016); Aviator Xpro (Bayer, 25.05.2016); Osiris (06.06.2016)	NA	NA	1270	YES	c3_335_15A1
c3_335_15B1	c3	AUBUSSON	335	15	B	Switzerland	Eschikon field station	04.07.2016	2016	Input (Bayer, 06.04.2016); Aviator Xpro (Bayer, 25.05.2016); Osiris (06.06.2016)	NA	NA	1545	NA	c3_335_15B1
c3_335_16A1	c3	AUBUSSON	335	16	A	Switzerland	Eschikon field station	04.07.2016	2016	Input (Bayer, 06.04.2016); Aviator Xpro (Bayer, 25.05.2016); Osiris (06.06.2016)	NA	NA	1033	NA	c3_335_16A1
c3_335_16A2	c3	AUBUSSON	335	16	A	Switzerland	Eschikon field station	04.07.2016	2016	Input (Bayer, 06.04.2016); Aviator Xpro (Bayer, 25.05.2016); Osiris (06.06.2016)	NA	NA	28	YES	c3_335_16A2
c3_335_2B1	c3	AUBUSSON	335	2	B	Switzerland	Eschikon field station	04.07.2016	2016	Input (Bayer, 06.04.2016); Aviator Xpro (Bayer, 25.05.2016); Osiris (06.06.2016)	NA	NA	1391	YES	c3_335_2B1
c3_335_3A1	c3	AUBUSSON	335	3	A	Switzerland	Eschikon field station	04.07.2016	2016	Input (Bayer, 06.04.2016); Aviator Xpro (Bayer, 25.05.2016); Osiris (06.06.2016)	NA	NA	1492	YES	c3_335_3A1
c3_335_5A1	c3	AUBUSSON	335	5	A	Switzerland	Eschikon field station	04.07.2016	2016	Input (Bayer, 06.04.2016); Aviator Xpro (Bayer, 25.05.2016); Osiris (06.06.2016)	NA	NA	595	YES	c3_335_5A1
c3_335_5A2	c3	AUBUSSON	335	5	A	Switzerland	Eschikon field station	04.07.2016	2016	Input (Bayer, 06.04.2016); Aviator Xpro (Bayer, 25.05.2016); Osiris (06.06.2016)	NA	NA	243	YES	c3_335_5A2
c3_335_5B1	c3	AUBUSSON	335	5	B	Switzerland	Eschikon field station	04.07.2016	2016	Input (Bayer, 06.04.2016); Aviator Xpro (Bayer, 25.05.2016); Osiris (06.06.2016)	NA	NA	269	NA	c3_335_5B1
c3_335_5B2	c3	AUBUSSON	335	5	B	Switzerland	Eschikon field station	04.07.2016	2016	Input (Bayer, 06.04.2016); Aviator Xpro (Bayer, 25.05.2016); Osiris (06.06.2016)	NA	NA	278	YES	c3_335_5B2
c3_335_6B1	c3	AUBUSSON	335	6	B	Switzerland	Eschikon field station	04.07.2016	2016	Input (Bayer, 06.04.2016); Aviator Xpro (Bayer, 25.05.2016); Osiris (06.06.2016)	NA	NA	429	YES	c3_335_6B1
c3_335_6B2	c3	AUBUSSON	335	6	B	Switzerland	Eschikon field station	04.07.2016	2016	Input (Bayer, 06.04.2016); Aviator Xpro (Bayer, 25.05.2016); Osiris (06.06.2016)	NA	NA	855	NA	c3_335_6B2
c3_335_7A1	c3	AUBUSSON	335	7	A	Switzerland	Eschikon field station	04.07.2016	2016	Input (Bayer, 06.04.2016); Aviator Xpro (Bayer, 25.05.2016); Osiris (06.06.2016)	NA	NA	404	NA	c3_335_7A1
c3_335_7A2	c3	AUBUSSON	335	7	A	Switzerland	Eschikon field station	04.07.2016	2016	Input (Bayer, 06.04.2016); Aviator Xpro (Bayer, 25.05.2016); Osiris (06.06.2016)	NA	NA	670	NA	c3_335_7A2
c3_335_7A3	c3	AUBUSSON	335	7	A	Switzerland	Eschikon field station	04.07.2016	2016	Input (Bayer, 06.04.2016); Aviator Xpro (Bayer, 25.05.2016); Osiris (06.06.2016)	NA	NA	670	NA	c3_335_7A3
c3_335_7B1	c3	AUBUSSON	335	7	B	Switzerland	Eschikon field station	04.07.2016	2016	Input (Bayer, 06.04.2016); Aviator Xpro (Bayer, 25.05.2016); Osiris (06.06.2016)	NA	NA	810	YES	c3_335_7B1
c3_335_7B2	c3	AUBUSSON	335	7	B	Switzerland	Eschikon field station	04.07.2016	2016	Input (Bayer, 06.04.2016); Aviator Xpro (Bayer, 25.05.2016); Osiris (06.06.2016)	NA	NA	504	YES	c3_335_7B2
c3_335_8A1	c3	AUBUSSON	335	8	A	Switzerland	Eschikon field station	04.07.2016	2016	Input (Bayer, 06.04.2016); Aviator Xpro (Bayer, 25.05.2016); Osiris (06.06.2016)	NA	NA	1572	NA	c3_335_8A1
c3_335_9A1	c3	AUBUSSON	335	9	A	Switzerland	Eschikon field station	04.07.2016	2016	Input (Bayer, 06.04.2016); Aviator Xpro (Bayer, 25.05.2016); Osiris (06.06.2016)	NA	NA	1314	NA	c3_335_9A1
c3_335_9A2	c3	AUBUSSON	335	9	A	Switzerland	Eschikon field station	04.07.2016	2016	Input (Bayer, 06.04.2016); Aviator Xpro (Bayer, 25.05.2016); Osiris (06.06.2016)	NA	NA	1333	NA	c3_335_9A2
c3_335_9A3	c3	AUBUSSON	335	9	A	Switzerland	Eschikon field station	04.07.2016	2016	Input (Bayer, 06.04.2016); Aviator Xpro (Bayer, 25.05.2016); Osiris (06.06.2016)	NA	NA	728	YES	c3_335_9A3
c3_335_9B1	c3	AUBUSSON	335	9	B	Switzerland	Eschikon field station	04.07.2016	2016	Input (Bayer, 06.04.2016); Aviator Xpro (Bayer, 25.05.2016); Osiris (06.06.2016)	NA	NA	1176	NA	c3_335_9B1
c3_438_10A1	c3	ARINA	438	10	A	Switzerland	Eschikon field station	04.07.2016	2016	Input (Bayer, 06.04.2016); Aviator Xpro (Bayer, 25.05.2016); Osiris (06.06.2016)	NA	NA	1488	YES	c3_438_10A1
c3_438_11A2	c3	ARINA	438	11	A	Switzerland	Eschikon field station	04.07.2016	2016	Input (Bayer, 06.04.2016); Aviator Xpro (Bayer, 25.05.2016); Osiris (06.06.2016)	NA	NA	52	YES	c3_438_11A2
c3_438_12A1	c3	ARINA	438	12	A	Switzerland	Eschikon field station	04.07.2016	2016	Input (Bayer, 06.04.2016); Aviator Xpro (Bayer, 25.05.2016); Osiris (06.06.2016)	NA	NA	1158	NA	c3_438_12A1
c3_438_12A2	c3	ARINA	438	12	A	Switzerland	Eschikon field station	04.07.2016	2016	Input (Bayer, 06.04.2016); Aviator Xpro (Bayer, 25.05.2016); Osiris (06.06.2016)	NA	NA	1460	YES	c3_438_12A2
c3_438_12B1	c3	ARINA	438	12	B	Switzerland	Eschikon field station	04.07.2016	2016	Input (Bayer, 06.04.2016); Aviator Xpro (Bayer, 25.05.2016); Osiris (06.06.2016)	NA	NA	88	YES	c3_438_12B1
c3_438_12B3	c3	ARINA	438	12	B	Switzerland	Eschikon field station	04.07.2016	2016	Input (Bayer, 06.04.2016); Aviator Xpro (Bayer, 25.05.2016); Osiris (06.06.2016)	NA	NA	179	NA	c3_438_12B3
c3_438_13A2	c3	ARINA	438	13	A	Switzerland	Eschikon field station	04.07.2016	2016	Input (Bayer, 06.04.2016); Aviator Xpro (Bayer, 25.05.2016); Osiris (06.06.2016)	NA	NA	475	YES	c3_438_13A2
c3_438_13A3	c3	ARINA	438	13	A	Switzerland	Eschikon field station	04.07.2016	2016	Input (Bayer, 06.04.2016); Aviator Xpro (Bayer, 25.05.2016); Osiris (06.06.2016)	NA	NA	1082	YES	c3_438_13A3
c3_438_13B1	c3	ARINA	438	13	B	Switzerland	Eschikon field station	04.07.2016	2016	Input (Bayer, 06.04.2016); Aviator Xpro (Bayer, 25.05.2016); Osiris (06.06.2016)	ST16CH_3M36	SRR10728699	1070	YES	c3_438_13B1
c3_438_13B2	c3	ARINA	438	13	B	Switzerland	Eschikon field station	04.07.2016	2016	Input (Bayer, 06.04.2016); Aviator Xpro (Bayer, 25.05.2016); Osiris (06.06.2016)	NA	NA	468	NA	c3_438_13B2
c3_438_13B3	c3	ARINA	438	13	B	Switzerland	Eschikon field station	04.07.2016	2016	Input (Bayer, 06.04.2016); Aviator Xpro (Bayer, 25.05.2016); Osiris (06.06.2016)	NA	NA	468	NA	c3_438_13B3
c3_438_15A1	c3	ARINA	438	15	A	Switzerland	Eschikon field station	04.07.2016	2016	Input (Bayer, 06.04.2016); Aviator Xpro (Bayer, 25.05.2016); Osiris (06.06.2016)	NA	NA	974	YES	c3_438_15A1
c3_438_15A2	c3	ARINA	438	15	A	Switzerland	Eschikon field station	04.07.2016	2016	Input (Bayer, 06.04.2016); Aviator Xpro (Bayer, 25.05.2016); Osiris (06.06.2016)	NA	NA	585	YES	c3_438_15A2
c3_438_15B1	c3	ARINA	438	15	B	Switzerland	Eschikon field station	04.07.2016	2016	Input (Bayer, 06.04.2016); Aviator Xpro (Bayer, 25.05.2016); Osiris (06.06.2016)	NA	NA	562	NA	c3_438_15B1
c3_438_15B2	c3	ARINA	438	15	B	Switzerland	Eschikon field station	04.07.2016	2016	Input (Bayer, 06.04.2016); Aviator Xpro (Bayer, 25.05.2016); Osiris (06.06.2016)	NA	NA	489	YES	c3_438_15B2
c3_438_16A2	c3	ARINA	438	16	A	Switzerland	Eschikon field station	04.07.2016	2016	Input (Bayer, 06.04.2016); Aviator Xpro (Bayer, 25.05.2016); Osiris (06.06.2016)	NA	NA	155	YES	c3_438_16A2
c3_438_2A1	c3	ARINA	438	2	A	Switzerland	Eschikon field station	04.07.2016	2016	Input (Bayer, 06.04.2016); Aviator Xpro (Bayer, 25.05.2016); Osiris (06.06.2016)	NA	NA	898	NA	c3_438_2A1
c3_438_2A3	c3	ARINA	438	2	A	Switzerland	Eschikon field station	04.07.2016	2016	Input (Bayer, 06.04.2016); Aviator Xpro (Bayer, 25.05.2016); Osiris (06.06.2016)	NA	NA	129	YES	c3_438_2A3
c3_438_3A1	c3	ARINA	438	3	A	Switzerland	Eschikon field station	04.07.2016	2016	Input (Bayer, 06.04.2016); Aviator Xpro (Bayer, 25.05.2016); Osiris (06.06.2016)	ST16CH_3M3	SRR10728700	433	YES	c3_438_3A1
c3_438_3A2	c3	ARINA	438	3	A	Switzerland	Eschikon field station	04.07.2016	2016	Input (Bayer, 06.04.2016); Aviator Xpro (Bayer, 25.05.2016); Osiris (06.06.2016)	NA	NA	433	NA	c3_438_3A2
c3_438_3A3	c3	ARINA	438	3	A	Switzerland	Eschikon field station	04.07.2016	2016	Input (Bayer, 06.04.2016); Aviator Xpro (Bayer, 25.05.2016); Osiris (06.06.2016)	NA	NA	433	NA	c3_438_3A3
c3_438_3B1	c3	ARINA	438	3	B	Switzerland	Eschikon field station	04.07.2016	2016	Input (Bayer, 06.04.2016); Aviator Xpro (Bayer, 25.05.2016); Osiris (06.06.2016)	NA	NA	405	YES	c3_438_3B1
c3_438_3B2	c3	ARINA	438	3	B	Switzerland	Eschikon field station	04.07.2016	2016	Input (Bayer, 06.04.2016); Aviator Xpro (Bayer, 25.05.2016); Osiris (06.06.2016)	NA	NA	481	NA	c3_438_3B2
c3_438_3B3	c3	ARINA	438	3	B	Switzerland	Eschikon field station	04.07.2016	2016	Input (Bayer, 06.04.2016); Aviator Xpro (Bayer, 25.05.2016); Osiris (06.06.2016)	NA	NA	481	NA	c3_438_3B3
c3_438_4A1	c3	ARINA	438	4	A	Switzerland	Eschikon field station	04.07.2016	2016	Input (Bayer, 06.04.2016); Aviator Xpro (Bayer, 25.05.2016); Osiris (06.06.2016)	NA	NA	653	YES	c3_438_4A1
c3_438_4A2	c3	ARINA	438	4	A	Switzerland	Eschikon field station	04.07.2016	2016	Input (Bayer, 06.04.2016); Aviator Xpro (Bayer, 25.05.2016); Osiris (06.06.2016)	NA	NA	631	NA	c3_438_4A2
c3_438_4A3	c3	ARINA	438	4	A	Switzerland	Eschikon field station	04.07.2016	2016	Input (Bayer, 06.04.2016); Aviator Xpro (Bayer, 25.05.2016); Osiris (06.06.2016)	NA	NA	631	NA	c3_438_4A3
c3_438_4B2	c3	ARINA	438	4	B	Switzerland	Eschikon field station	04.07.2016	2016	Input (Bayer, 06.04.2016); Aviator Xpro (Bayer, 25.05.2016); Osiris (06.06.2016)	NA	NA	698	NA	c3_438_4B2
c3_438_4B3	c3	ARINA	438	4	B	Switzerland	Eschikon field station	04.07.2016	2016	Input (Bayer, 06.04.2016); Aviator Xpro (Bayer, 25.05.2016); Osiris (06.06.2016)	NA	NA	675	YES	c3_438_4B3
c3_438_5A1	c3	ARINA	438	5	A	Switzerland	Eschikon field station	04.07.2016	2016	Input (Bayer, 06.04.2016); Aviator Xpro (Bayer, 25.05.2016); Osiris (06.06.2016)	NA	NA	1143	NA	c3_438_5A1
c3_438_5A2	c3	ARINA	438	5	A	Switzerland	Eschikon field station	04.07.2016	2016	Input (Bayer, 06.04.2016); Aviator Xpro (Bayer, 25.05.2016); Osiris (06.06.2016)	NA	NA	1143	NA	c3_438_5A2
c3_438_5A3	c3	ARINA	438	5	A	Switzerland	Eschikon field station	04.07.2016	2016	Input (Bayer, 06.04.2016); Aviator Xpro (Bayer, 25.05.2016); Osiris (06.06.2016)	NA	NA	1469	NA	c3_438_5A3
c3_438_6B1	c3	ARINA	438	6	B	Switzerland	Eschikon field station	04.07.2016	2016	Input (Bayer, 06.04.2016); Aviator Xpro (Bayer, 25.05.2016); Osiris (06.06.2016)	NA	NA	358	YES	c3_438_6B1
c3_438_6B2	c3	ARINA	438	6	B	Switzerland	Eschikon field station	04.07.2016	2016	Input (Bayer, 06.04.2016); Aviator Xpro (Bayer, 25.05.2016); Osiris (06.06.2016)	ST16CH_3M19	SRR10728703	746	YES	c3_438_6B2
c3_438_8A1	c3	ARINA	438	8	A	Switzerland	Eschikon field station	04.07.2016	2016	Input (Bayer, 06.04.2016); Aviator Xpro (Bayer, 25.05.2016); Osiris (06.06.2016)	NA	NA	519	NA	c3_438_8A1
c3_438_8A3	c3	ARINA	438	8	A	Switzerland	Eschikon field station	04.07.2016	2016	Input (Bayer, 06.04.2016); Aviator Xpro (Bayer, 25.05.2016); Osiris (06.06.2016)	NA	NA	470	YES	c3_438_8A3
c3_438_8B2	c3	ARINA	438	8	B	Switzerland	Eschikon field station	04.07.2016	2016	Input (Bayer, 06.04.2016); Aviator Xpro (Bayer, 25.05.2016); Osiris (06.06.2016)	NA	NA	518	YES	c3_438_8B2
c3_438_8B3	c3	ARINA	438	8	B	Switzerland	Eschikon field station	04.07.2016	2016	Input (Bayer, 06.04.2016); Aviator Xpro (Bayer, 25.05.2016); Osiris (06.06.2016)	NA	NA	469	YES	c3_438_8B3
c3_438_9A3	c3	ARINA	438	9	A	Switzerland	Eschikon field station	04.07.2016	2016	Input (Bayer, 06.04.2016); Aviator Xpro (Bayer, 25.05.2016); Osiris (06.06.2016)	ST16CH_3M24	SRR10728701	963	NA	c3_438_9A3
c3_438_9B1	c3	ARINA	438	9	B	Switzerland	Eschikon field station	04.07.2016	2016	Input (Bayer, 06.04.2016); Aviator Xpro (Bayer, 25.05.2016); Osiris (06.06.2016)	NA	NA	386	YES	c3_438_9B1
c3_438_9B2	c3	ARINA	438	9	B	Switzerland	Eschikon field station	04.07.2016	2016	Input (Bayer, 06.04.2016); Aviator Xpro (Bayer, 25.05.2016); Osiris (06.06.2016)	NA	NA	582	NA	c3_438_9B2
c3_438_9B3	c3	ARINA	438	9	B	Switzerland	Eschikon field station	04.07.2016	2016	Input (Bayer, 06.04.2016); Aviator Xpro (Bayer, 25.05.2016); Osiris (06.06.2016)	NA	NA	641	YES	c3_438_9B3
c3_439_10B1	c3	FOREL	439	10	B	Switzerland	Eschikon field station	04.07.2016	2016	Input (Bayer, 06.04.2016); Aviator Xpro (Bayer, 25.05.2016); Osiris (06.06.2016)	ST16CH_3N27	SRR10728698	1414	YES	c3_439_10B1
c3_439_10B2	c3	FOREL	439	10	B	Switzerland	Eschikon field station	04.07.2016	2016	Input (Bayer, 06.04.2016); Aviator Xpro (Bayer, 25.05.2016); Osiris (06.06.2016)	NA	NA	801	YES	c3_439_10B2
c3_439_11A1	c3	FOREL	439	11	A	Switzerland	Eschikon field station	04.07.2016	2016	Input (Bayer, 06.04.2016); Aviator Xpro (Bayer, 25.05.2016); Osiris (06.06.2016)	NA	NA	971	YES	c3_439_11A1
c3_439_11A2	c3	FOREL	439	11	A	Switzerland	Eschikon field station	04.07.2016	2016	Input (Bayer, 06.04.2016); Aviator Xpro (Bayer, 25.05.2016); Osiris (06.06.2016)	NA	NA	621	YES	c3_439_11A2
c3_439_11B2	c3	FOREL	439	11	B	Switzerland	Eschikon field station	04.07.2016	2016	Input (Bayer, 06.04.2016); Aviator Xpro (Bayer, 25.05.2016); Osiris (06.06.2016)	NA	NA	1317	NA	c3_439_11B2
c3_439_11B3	c3	FOREL	439	11	B	Switzerland	Eschikon field station	04.07.2016	2016	Input (Bayer, 06.04.2016); Aviator Xpro (Bayer, 25.05.2016); Osiris (06.06.2016)	NA	NA	594	NA	c3_439_11B3
c3_439_12A1	c3	FOREL	439	12	A	Switzerland	Eschikon field station	04.07.2016	2016	Input (Bayer, 06.04.2016); Aviator Xpro (Bayer, 25.05.2016); Osiris (06.06.2016)	NA	NA	1412	YES	c3_439_12A1
c3_439_12A2	c3	FOREL	439	12	A	Switzerland	Eschikon field station	04.07.2016	2016	Input (Bayer, 06.04.2016); Aviator Xpro (Bayer, 25.05.2016); Osiris (06.06.2016)	NA	NA	831	YES	c3_439_12A2
c3_439_13A1	c3	FOREL	439	13	A	Switzerland	Eschikon field station	04.07.2016	2016	Input (Bayer, 06.04.2016); Aviator Xpro (Bayer, 25.05.2016); Osiris (06.06.2016)	NA	NA	949	YES	c3_439_13A1
c3_439_13B1	c3	FOREL	439	13	B	Switzerland	Eschikon field station	04.07.2016	2016	Input (Bayer, 06.04.2016); Aviator Xpro (Bayer, 25.05.2016); Osiris (06.06.2016)	NA	NA	1296	YES	c3_439_13B1
c3_439_13B2	c3	FOREL	439	13	B	Switzerland	Eschikon field station	04.07.2016	2016	Input (Bayer, 06.04.2016); Aviator Xpro (Bayer, 25.05.2016); Osiris (06.06.2016)	NA	NA	1220	NA	c3_439_13B2
c3_439_13B3	c3	FOREL	439	13	B	Switzerland	Eschikon field station	04.07.2016	2016	Input (Bayer, 06.04.2016); Aviator Xpro (Bayer, 25.05.2016); Osiris (06.06.2016)	NA	NA	1067	NA	c3_439_13B3
c3_439_14A1	c3	FOREL	439	14	A	Switzerland	Eschikon field station	04.07.2016	2016	Input (Bayer, 06.04.2016); Aviator Xpro (Bayer, 25.05.2016); Osiris (06.06.2016)	NA	NA	1179	NA	c3_439_14A1
c3_439_14B1	c3	FOREL	439	14	B	Switzerland	Eschikon field station	04.07.2016	2016	Input (Bayer, 06.04.2016); Aviator Xpro (Bayer, 25.05.2016); Osiris (06.06.2016)	NA	NA	864	NA	c3_439_14B1
c3_439_14B2	c3	FOREL	439	14	B	Switzerland	Eschikon field station	04.07.2016	2016	Input (Bayer, 06.04.2016); Aviator Xpro (Bayer, 25.05.2016); Osiris (06.06.2016)	NA	NA	741	YES	c3_439_14B2
c3_439_14B3	c3	FOREL	439	14	B	Switzerland	Eschikon field station	04.07.2016	2016	Input (Bayer, 06.04.2016); Aviator Xpro (Bayer, 25.05.2016); Osiris (06.06.2016)	NA	NA	845	YES	c3_439_14B3
c3_439_15A2	c3	FOREL	439	15	A	Switzerland	Eschikon field station	04.07.2016	2016	Input (Bayer, 06.04.2016); Aviator Xpro (Bayer, 25.05.2016); Osiris (06.06.2016)	NA	NA	1147	YES	c3_439_15A2
c3_439_15A3	c3	FOREL	439	15	A	Switzerland	Eschikon field station	04.07.2016	2016	Input (Bayer, 06.04.2016); Aviator Xpro (Bayer, 25.05.2016); Osiris (06.06.2016)	NA	NA	973	YES	c3_439_15A3
c3_439_15B2	c3	FOREL	439	15	B	Switzerland	Eschikon field station	04.07.2016	2016	Input (Bayer, 06.04.2016); Aviator Xpro (Bayer, 25.05.2016); Osiris (06.06.2016)	NA	NA	875	YES	c3_439_15B2
c3_439_16A2	c3	FOREL	439	16	A	Switzerland	Eschikon field station	04.07.2016	2016	Input (Bayer, 06.04.2016); Aviator Xpro (Bayer, 25.05.2016); Osiris (06.06.2016)	NA	NA	1461	NA	c3_439_16A2
c3_439_16A3	c3	FOREL	439	16	A	Switzerland	Eschikon field station	04.07.2016	2016	Input (Bayer, 06.04.2016); Aviator Xpro (Bayer, 25.05.2016); Osiris (06.06.2016)	NA	NA	1151	YES	c3_439_16A3
c3_439_1A1	c3	FOREL	439	1	A	Switzerland	Eschikon field station	04.07.2016	2016	Input (Bayer, 06.04.2016); Aviator Xpro (Bayer, 25.05.2016); Osiris (06.06.2016)	NA	NA	1464	NA	c3_439_1A1
c3_439_1A2	c3	FOREL	439	1	A	Switzerland	Eschikon field station	04.07.2016	2016	Input (Bayer, 06.04.2016); Aviator Xpro (Bayer, 25.05.2016); Osiris (06.06.2016)	NA	NA	589	NA	c3_439_1A2
c3_439_1B1	c3	FOREL	439	1	B	Switzerland	Eschikon field station	04.07.2016	2016	Input (Bayer, 06.04.2016); Aviator Xpro (Bayer, 25.05.2016); Osiris (06.06.2016)	NA	NA	1433	NA	c3_439_1B1
c3_439_1B2	c3	FOREL	439	1	B	Switzerland	Eschikon field station	04.07.2016	2016	Input (Bayer, 06.04.2016); Aviator Xpro (Bayer, 25.05.2016); Osiris (06.06.2016)	NA	NA	113	YES	c3_439_1B2
c3_439_1B3	c3	FOREL	439	1	B	Switzerland	Eschikon field station	04.07.2016	2016	Input (Bayer, 06.04.2016); Aviator Xpro (Bayer, 25.05.2016); Osiris (06.06.2016)	NA	NA	1142	NA	c3_439_1B3
c3_439_2A1	c3	FOREL	439	2	A	Switzerland	Eschikon field station	04.07.2016	2016	Input (Bayer, 06.04.2016); Aviator Xpro (Bayer, 25.05.2016); Osiris (06.06.2016)	NA	NA	1407	YES	c3_439_2A1
c3_439_3A1	c3	FOREL	439	3	A	Switzerland	Eschikon field station	04.07.2016	2016	Input (Bayer, 06.04.2016); Aviator Xpro (Bayer, 25.05.2016); Osiris (06.06.2016)	NA	NA	1385	NA	c3_439_3A1
c3_439_4A1	c3	FOREL	439	4	A	Switzerland	Eschikon field station	04.07.2016	2016	Input (Bayer, 06.04.2016); Aviator Xpro (Bayer, 25.05.2016); Osiris (06.06.2016)	ST16CH_3N8	SRR10728695	106	YES	c3_439_4A1
c3_439_4A2	c3	FOREL	439	4	A	Switzerland	Eschikon field station	04.07.2016	2016	Input (Bayer, 06.04.2016); Aviator Xpro (Bayer, 25.05.2016); Osiris (06.06.2016)	NA	NA	119	NA	c3_439_4A2
c3_439_4A3	c3	FOREL	439	4	A	Switzerland	Eschikon field station	04.07.2016	2016	Input (Bayer, 06.04.2016); Aviator Xpro (Bayer, 25.05.2016); Osiris (06.06.2016)	NA	NA	119	NA	c3_439_4A3
c3_439_5A1	c3	FOREL	439	5	A	Switzerland	Eschikon field station	04.07.2016	2016	Input (Bayer, 06.04.2016); Aviator Xpro (Bayer, 25.05.2016); Osiris (06.06.2016)	NA	NA	696	NA	c3_439_5A1
c3_439_5A2	c3	FOREL	439	5	A	Switzerland	Eschikon field station	04.07.2016	2016	Input (Bayer, 06.04.2016); Aviator Xpro (Bayer, 25.05.2016); Osiris (06.06.2016)	NA	NA	1249	NA	c3_439_5A2
c3_439_5B1	c3	FOREL	439	5	B	Switzerland	Eschikon field station	04.07.2016	2016	Input (Bayer, 06.04.2016); Aviator Xpro (Bayer, 25.05.2016); Osiris (06.06.2016)	NA	NA	1015	NA	c3_439_5B1
c3_439_5B2	c3	FOREL	439	5	B	Switzerland	Eschikon field station	04.07.2016	2016	Input (Bayer, 06.04.2016); Aviator Xpro (Bayer, 25.05.2016); Osiris (06.06.2016)	NA	NA	634	YES	c3_439_5B2
c3_439_6A1	c3	FOREL	439	6	A	Switzerland	Eschikon field station	04.07.2016	2016	Input (Bayer, 06.04.2016); Aviator Xpro (Bayer, 25.05.2016); Osiris (06.06.2016)	NA	NA	431	YES	c3_439_6A1
c3_439_6A2	c3	FOREL	439	6	A	Switzerland	Eschikon field station	04.07.2016	2016	Input (Bayer, 06.04.2016); Aviator Xpro (Bayer, 25.05.2016); Osiris (06.06.2016)	NA	NA	578	NA	c3_439_6A2
c3_439_6A3	c3	FOREL	439	6	A	Switzerland	Eschikon field station	04.07.2016	2016	Input (Bayer, 06.04.2016); Aviator Xpro (Bayer, 25.05.2016); Osiris (06.06.2016)	NA	NA	387	NA	c3_439_6A3
c3_439_7A1	c3	FOREL	439	7	A	Switzerland	Eschikon field station	04.07.2016	2016	Input (Bayer, 06.04.2016); Aviator Xpro (Bayer, 25.05.2016); Osiris (06.06.2016)	NA	NA	268	NA	c3_439_7A1
c3_439_8A1	c3	FOREL	439	8	A	Switzerland	Eschikon field station	04.07.2016	2016	Input (Bayer, 06.04.2016); Aviator Xpro (Bayer, 25.05.2016); Osiris (06.06.2016)	NA	NA	1150	NA	c3_439_8A1
c3_439_8A2	c3	FOREL	439	8	A	Switzerland	Eschikon field station	04.07.2016	2016	Input (Bayer, 06.04.2016); Aviator Xpro (Bayer, 25.05.2016); Osiris (06.06.2016)	NA	NA	1182	NA	c3_439_8A2
c3_439_8A3	c3	FOREL	439	8	A	Switzerland	Eschikon field station	04.07.2016	2016	Input (Bayer, 06.04.2016); Aviator Xpro (Bayer, 25.05.2016); Osiris (06.06.2016)	NA	NA	751	NA	c3_439_8A3
c3_439_9A1	c3	FOREL	439	9	A	Switzerland	Eschikon field station	04.07.2016	2016	Input (Bayer, 06.04.2016); Aviator Xpro (Bayer, 25.05.2016); Osiris (06.06.2016)	NA	NA	1254	NA	c3_439_9A1
c3_45_14B1	c3	CH COMBIN	45	14	B	Switzerland	Eschikon field station	04.07.2016	2016	Input (Bayer, 06.04.2016); Aviator Xpro (Bayer, 25.05.2016); Osiris (06.06.2016)	NA	NA	1471	YES	c3_45_14B1
c3_45_14B2	c3	CH COMBIN	45	14	B	Switzerland	Eschikon field station	04.07.2016	2016	Input (Bayer, 06.04.2016); Aviator Xpro (Bayer, 25.05.2016); Osiris (06.06.2016)	NA	NA	1472	NA	c3_45_14B2
c3_45_14B3	c3	CH COMBIN	45	14	B	Switzerland	Eschikon field station	04.07.2016	2016	Input (Bayer, 06.04.2016); Aviator Xpro (Bayer, 25.05.2016); Osiris (06.06.2016)	ST16CH_3D10	SRR10728732	1444	NA	c3_45_14B3
c3_45_16A1	c3	CH COMBIN	45	16	A	Switzerland	Eschikon field station	04.07.2016	2016	Input (Bayer, 06.04.2016); Aviator Xpro (Bayer, 25.05.2016); Osiris (06.06.2016)	NA	NA	570	NA	c3_45_16A1
c3_45_16B1	c3	CH COMBIN	45	16	B	Switzerland	Eschikon field station	04.07.2016	2016	Input (Bayer, 06.04.2016); Aviator Xpro (Bayer, 25.05.2016); Osiris (06.06.2016)	NA	NA	571	NA	c3_45_16B1
c3_45_3A1	c3	CH COMBIN	45	3	A	Switzerland	Eschikon field station	04.07.2016	2016	Input (Bayer, 06.04.2016); Aviator Xpro (Bayer, 25.05.2016); Osiris (06.06.2016)	ST16CH_3D1	SRR10728733	212	NA	c3_45_3A1
c3_45_3A2	c3	CH COMBIN	45	3	A	Switzerland	Eschikon field station	04.07.2016	2016	Input (Bayer, 06.04.2016); Aviator Xpro (Bayer, 25.05.2016); Osiris (06.06.2016)	NA	NA	212	NA	c3_45_3A2
c3_45_3A3	c3	CH COMBIN	45	3	A	Switzerland	Eschikon field station	04.07.2016	2016	Input (Bayer, 06.04.2016); Aviator Xpro (Bayer, 25.05.2016); Osiris (06.06.2016)	NA	NA	191	YES	c3_45_3A3
c3_45_6A1	c3	CH COMBIN	45	6	A	Switzerland	Eschikon field station	04.07.2016	2016	Input (Bayer, 06.04.2016); Aviator Xpro (Bayer, 25.05.2016); Osiris (06.06.2016)	NA	NA	214	YES	c3_45_6A1
c3_45_6A3	c3	CH COMBIN	45	6	A	Switzerland	Eschikon field station	04.07.2016	2016	Input (Bayer, 06.04.2016); Aviator Xpro (Bayer, 25.05.2016); Osiris (06.06.2016)	NA	NA	1339	YES	c3_45_6A3
c3_45_6B1	c3	CH COMBIN	45	6	B	Switzerland	Eschikon field station	04.07.2016	2016	Input (Bayer, 06.04.2016); Aviator Xpro (Bayer, 25.05.2016); Osiris (06.06.2016)	ST16CH_3D6	SRR10728731	681	NA	c3_45_6B1
c3_45_8A1	c3	CH COMBIN	45	8	A	Switzerland	Eschikon field station	04.07.2016	2016	Input (Bayer, 06.04.2016); Aviator Xpro (Bayer, 25.05.2016); Osiris (06.06.2016)	ST16CH_3D7	SRR10728730	560	YES	c3_45_8A1
c3_458_11A1	c3	CH CLARO	458	11	A	Switzerland	Eschikon field station	04.07.2016	2016	Input (Bayer, 06.04.2016); Aviator Xpro (Bayer, 25.05.2016); Osiris (06.06.2016)	NA	NA	729	NA	c3_458_11A1
c3_458_12A2	c3	CH CLARO	458	12	A	Switzerland	Eschikon field station	04.07.2016	2016	Input (Bayer, 06.04.2016); Aviator Xpro (Bayer, 25.05.2016); Osiris (06.06.2016)	ST16CH_3O24	SRR10728693	1263	YES	c3_458_12A2
c3_458_13B1	c3	CH CLARO	458	13	B	Switzerland	Eschikon field station	04.07.2016	2016	Input (Bayer, 06.04.2016); Aviator Xpro (Bayer, 25.05.2016); Osiris (06.06.2016)	NA	NA	730	NA	c3_458_13B1
c3_458_14A1	c3	CH CLARO	458	14	A	Switzerland	Eschikon field station	04.07.2016	2016	Input (Bayer, 06.04.2016); Aviator Xpro (Bayer, 25.05.2016); Osiris (06.06.2016)	NA	NA	1019	NA	c3_458_14A1
c3_458_15A1	c3	CH CLARO	458	15	A	Switzerland	Eschikon field station	04.07.2016	2016	Input (Bayer, 06.04.2016); Aviator Xpro (Bayer, 25.05.2016); Osiris (06.06.2016)	NA	NA	938	YES	c3_458_15A1
c3_458_15A2	c3	CH CLARO	458	15	A	Switzerland	Eschikon field station	04.07.2016	2016	Input (Bayer, 06.04.2016); Aviator Xpro (Bayer, 25.05.2016); Osiris (06.06.2016)	NA	NA	1128	NA	c3_458_15A2
c3_458_15A3	c3	CH CLARO	458	15	A	Switzerland	Eschikon field station	04.07.2016	2016	Input (Bayer, 06.04.2016); Aviator Xpro (Bayer, 25.05.2016); Osiris (06.06.2016)	NA	NA	1128	NA	c3_458_15A3
c3_458_15B2	c3	CH CLARO	458	15	B	Switzerland	Eschikon field station	04.07.2016	2016	Input (Bayer, 06.04.2016); Aviator Xpro (Bayer, 25.05.2016); Osiris (06.06.2016)	NA	NA	1057	NA	c3_458_15B2
c3_458_16A1	c3	CH CLARO	458	16	A	Switzerland	Eschikon field station	04.07.2016	2016	Input (Bayer, 06.04.2016); Aviator Xpro (Bayer, 25.05.2016); Osiris (06.06.2016)	NA	NA	866	YES	c3_458_16A1
c3_458_16A2	c3	CH CLARO	458	16	A	Switzerland	Eschikon field station	04.07.2016	2016	Input (Bayer, 06.04.2016); Aviator Xpro (Bayer, 25.05.2016); Osiris (06.06.2016)	NA	NA	1019	NA	c3_458_16A2
c3_458_1A1	c3	CH CLARO	458	1	A	Switzerland	Eschikon field station	04.07.2016	2016	Input (Bayer, 06.04.2016); Aviator Xpro (Bayer, 25.05.2016); Osiris (06.06.2016)	NA	NA	488	NA	c3_458_1A1
c3_458_1A2	c3	CH CLARO	458	1	A	Switzerland	Eschikon field station	04.07.2016	2016	Input (Bayer, 06.04.2016); Aviator Xpro (Bayer, 25.05.2016); Osiris (06.06.2016)	NA	NA	1106	NA	c3_458_1A2
c3_458_1B1	c3	CH CLARO	458	1	B	Switzerland	Eschikon field station	04.07.2016	2016	Input (Bayer, 06.04.2016); Aviator Xpro (Bayer, 25.05.2016); Osiris (06.06.2016)	NA	NA	602	NA	c3_458_1B1
c3_458_1B2	c3	CH CLARO	458	1	B	Switzerland	Eschikon field station	04.07.2016	2016	Input (Bayer, 06.04.2016); Aviator Xpro (Bayer, 25.05.2016); Osiris (06.06.2016)	NA	NA	991	NA	c3_458_1B2
c3_458_2A1	c3	CH CLARO	458	2	A	Switzerland	Eschikon field station	04.07.2016	2016	Input (Bayer, 06.04.2016); Aviator Xpro (Bayer, 25.05.2016); Osiris (06.06.2016)	NA	NA	1133	YES	c3_458_2A1
c3_458_2A2	c3	CH CLARO	458	2	A	Switzerland	Eschikon field station	04.07.2016	2016	Input (Bayer, 06.04.2016); Aviator Xpro (Bayer, 25.05.2016); Osiris (06.06.2016)	NA	NA	492	NA	c3_458_2A2
c3_458_2B1	c3	CH CLARO	458	2	B	Switzerland	Eschikon field station	04.07.2016	2016	Input (Bayer, 06.04.2016); Aviator Xpro (Bayer, 25.05.2016); Osiris (06.06.2016)	NA	NA	1115	YES	c3_458_2B1
c3_458_5A1	c3	CH CLARO	458	5	A	Switzerland	Eschikon field station	04.07.2016	2016	Input (Bayer, 06.04.2016); Aviator Xpro (Bayer, 25.05.2016); Osiris (06.06.2016)	ST16CH_3O9	SRR10728692	152	YES	c3_458_5A1
c3_458_6A1	c3	CH CLARO	458	6	A	Switzerland	Eschikon field station	04.07.2016	2016	Input (Bayer, 06.04.2016); Aviator Xpro (Bayer, 25.05.2016); Osiris (06.06.2016)	NA	NA	1104	NA	c3_458_6A1
c3_458_7A1	c3	CH CLARO	458	7	A	Switzerland	Eschikon field station	04.07.2016	2016	Input (Bayer, 06.04.2016); Aviator Xpro (Bayer, 25.05.2016); Osiris (06.06.2016)	NA	NA	1224	YES	c3_458_7A1
c3_458_7A2	c3	CH CLARO	458	7	A	Switzerland	Eschikon field station	04.07.2016	2016	Input (Bayer, 06.04.2016); Aviator Xpro (Bayer, 25.05.2016); Osiris (06.06.2016)	NA	NA	507	NA	c3_458_7A2
c3_458_7B1	c3	CH CLARO	458	7	B	Switzerland	Eschikon field station	04.07.2016	2016	Input (Bayer, 06.04.2016); Aviator Xpro (Bayer, 25.05.2016); Osiris (06.06.2016)	NA	NA	1017	YES	c3_458_7B1
c3_458_7B2	c3	CH CLARO	458	7	B	Switzerland	Eschikon field station	04.07.2016	2016	Input (Bayer, 06.04.2016); Aviator Xpro (Bayer, 25.05.2016); Osiris (06.06.2016)	NA	NA	1066	NA	c3_458_7B2
c3_458_8A1	c3	CH CLARO	458	8	A	Switzerland	Eschikon field station	04.07.2016	2016	Input (Bayer, 06.04.2016); Aviator Xpro (Bayer, 25.05.2016); Osiris (06.06.2016)	NA	NA	879	NA	c3_458_8A1
c3_458_8B1	c3	CH CLARO	458	8	B	Switzerland	Eschikon field station	04.07.2016	2016	Input (Bayer, 06.04.2016); Aviator Xpro (Bayer, 25.05.2016); Osiris (06.06.2016)	NA	NA	1066	NA	c3_458_8B1
c3_458_8B3	c3	CH CLARO	458	8	B	Switzerland	Eschikon field station	04.07.2016	2016	Input (Bayer, 06.04.2016); Aviator Xpro (Bayer, 25.05.2016); Osiris (06.06.2016)	NA	NA	1522	NA	c3_458_8B3
c3_458_9A1	c3	CH CLARO	458	9	A	Switzerland	Eschikon field station	04.07.2016	2016	Input (Bayer, 06.04.2016); Aviator Xpro (Bayer, 25.05.2016); Osiris (06.06.2016)	NA	NA	494	NA	c3_458_9A1
c3_458_9A2	c3	CH CLARO	458	9	A	Switzerland	Eschikon field station	04.07.2016	2016	Input (Bayer, 06.04.2016); Aviator Xpro (Bayer, 25.05.2016); Osiris (06.06.2016)	NA	NA	1125	NA	c3_458_9A2
c3_458_9B1	c3	CH CLARO	458	9	B	Switzerland	Eschikon field station	04.07.2016	2016	Input (Bayer, 06.04.2016); Aviator Xpro (Bayer, 25.05.2016); Osiris (06.06.2016)	ST16CH_3O21	SRR10728694	556	YES	c3_458_9B1
c3_470_10A1	c3	CH CAMEDO	470	10	A	Switzerland	Eschikon field station	04.07.2016	2016	Input (Bayer, 06.04.2016); Aviator Xpro (Bayer, 25.05.2016); Osiris (06.06.2016)	NA	NA	1474	YES	c3_470_10A1
c3_470_10B3	c3	CH CAMEDO	470	10	B	Switzerland	Eschikon field station	04.07.2016	2016	Input (Bayer, 06.04.2016); Aviator Xpro (Bayer, 25.05.2016); Osiris (06.06.2016)	NA	NA	334	YES	c3_470_10B3
c3_470_11A3	c3	CH CAMEDO	470	11	A	Switzerland	Eschikon field station	04.07.2016	2016	Input (Bayer, 06.04.2016); Aviator Xpro (Bayer, 25.05.2016); Osiris (06.06.2016)	NA	NA	708	YES	c3_470_11A3
c3_470_11B1	c3	CH CAMEDO	470	11	B	Switzerland	Eschikon field station	04.07.2016	2016	Input (Bayer, 06.04.2016); Aviator Xpro (Bayer, 25.05.2016); Osiris (06.06.2016)	NA	NA	1194	NA	c3_470_11B1
c3_470_11B3	c3	CH CAMEDO	470	11	B	Switzerland	Eschikon field station	04.07.2016	2016	Input (Bayer, 06.04.2016); Aviator Xpro (Bayer, 25.05.2016); Osiris (06.06.2016)	NA	NA	522	YES	c3_470_11B3
c3_470_12A2	c3	CH CAMEDO	470	12	A	Switzerland	Eschikon field station	04.07.2016	2016	Input (Bayer, 06.04.2016); Aviator Xpro (Bayer, 25.05.2016); Osiris (06.06.2016)	NA	NA	1463	YES	c3_470_12A2
c3_470_12B3	c3	CH CAMEDO	470	12	B	Switzerland	Eschikon field station	04.07.2016	2016	Input (Bayer, 06.04.2016); Aviator Xpro (Bayer, 25.05.2016); Osiris (06.06.2016)	NA	NA	298	YES	c3_470_12B3
c3_470_13B2	c3	CH CAMEDO	470	13	B	Switzerland	Eschikon field station	04.07.2016	2016	Input (Bayer, 06.04.2016); Aviator Xpro (Bayer, 25.05.2016); Osiris (06.06.2016)	NA	NA	327	YES	c3_470_13B2
c3_470_13B3	c3	CH CAMEDO	470	13	B	Switzerland	Eschikon field station	04.07.2016	2016	Input (Bayer, 06.04.2016); Aviator Xpro (Bayer, 25.05.2016); Osiris (06.06.2016)	NA	NA	1311	YES	c3_470_13B3
c3_470_14B1	c3	CH CAMEDO	470	14	B	Switzerland	Eschikon field station	04.07.2016	2016	Input (Bayer, 06.04.2016); Aviator Xpro (Bayer, 25.05.2016); Osiris (06.06.2016)	NA	NA	1318	NA	c3_470_14B1
c3_470_14B2	c3	CH CAMEDO	470	14	B	Switzerland	Eschikon field station	04.07.2016	2016	Input (Bayer, 06.04.2016); Aviator Xpro (Bayer, 25.05.2016); Osiris (06.06.2016)	NA	NA	684	NA	c3_470_14B2
c3_470_14B3	c3	CH CAMEDO	470	14	B	Switzerland	Eschikon field station	04.07.2016	2016	Input (Bayer, 06.04.2016); Aviator Xpro (Bayer, 25.05.2016); Osiris (06.06.2016)	NA	NA	1316	YES	c3_470_14B3
c3_470_15A1	c3	CH CAMEDO	470	15	A	Switzerland	Eschikon field station	04.07.2016	2016	Input (Bayer, 06.04.2016); Aviator Xpro (Bayer, 25.05.2016); Osiris (06.06.2016)	ST16CH_3P39	SRR10728688	576	YES	c3_470_15A1
c3_470_15A2	c3	CH CAMEDO	470	15	A	Switzerland	Eschikon field station	04.07.2016	2016	Input (Bayer, 06.04.2016); Aviator Xpro (Bayer, 25.05.2016); Osiris (06.06.2016)	NA	NA	354	NA	c3_470_15A2
c3_470_15A3	c3	CH CAMEDO	470	15	A	Switzerland	Eschikon field station	04.07.2016	2016	Input (Bayer, 06.04.2016); Aviator Xpro (Bayer, 25.05.2016); Osiris (06.06.2016)	NA	NA	354	NA	c3_470_15A3
c3_470_15B2	c3	CH CAMEDO	470	15	B	Switzerland	Eschikon field station	04.07.2016	2016	Input (Bayer, 06.04.2016); Aviator Xpro (Bayer, 25.05.2016); Osiris (06.06.2016)	NA	NA	727	YES	c3_470_15B2
c3_470_16A2	c3	CH CAMEDO	470	16	A	Switzerland	Eschikon field station	04.07.2016	2016	Input (Bayer, 06.04.2016); Aviator Xpro (Bayer, 25.05.2016); Osiris (06.06.2016)	NA	NA	1410	YES	c3_470_16A2
c3_470_16A3	c3	CH CAMEDO	470	16	A	Switzerland	Eschikon field station	04.07.2016	2016	Input (Bayer, 06.04.2016); Aviator Xpro (Bayer, 25.05.2016); Osiris (06.06.2016)	NA	NA	1004	NA	c3_470_16A3
c3_470_2A3	c3	CH CAMEDO	470	2	A	Switzerland	Eschikon field station	04.07.2016	2016	Input (Bayer, 06.04.2016); Aviator Xpro (Bayer, 25.05.2016); Osiris (06.06.2016)	NA	NA	561	YES	c3_470_2A3
c3_470_2B2	c3	CH CAMEDO	470	2	B	Switzerland	Eschikon field station	04.07.2016	2016	Input (Bayer, 06.04.2016); Aviator Xpro (Bayer, 25.05.2016); Osiris (06.06.2016)	NA	NA	101	YES	c3_470_2B2
c3_470_3B2	c3	CH CAMEDO	470	3	B	Switzerland	Eschikon field station	04.07.2016	2016	Input (Bayer, 06.04.2016); Aviator Xpro (Bayer, 25.05.2016); Osiris (06.06.2016)	NA	NA	51	YES	c3_470_3B2
c3_470_4A2	c3	CH CAMEDO	470	4	A	Switzerland	Eschikon field station	04.07.2016	2016	Input (Bayer, 06.04.2016); Aviator Xpro (Bayer, 25.05.2016); Osiris (06.06.2016)	NA	NA	170	YES	c3_470_4A2
c3_470_4B1	c3	CH CAMEDO	470	4	B	Switzerland	Eschikon field station	04.07.2016	2016	Input (Bayer, 06.04.2016); Aviator Xpro (Bayer, 25.05.2016); Osiris (06.06.2016)	NA	NA	1001	YES	c3_470_4B1
c3_470_5A1	c3	CH CAMEDO	470	5	A	Switzerland	Eschikon field station	04.07.2016	2016	Input (Bayer, 06.04.2016); Aviator Xpro (Bayer, 25.05.2016); Osiris (06.06.2016)	NA	NA	684	NA	c3_470_5A1
c3_470_5A3	c3	CH CAMEDO	470	5	A	Switzerland	Eschikon field station	04.07.2016	2016	Input (Bayer, 06.04.2016); Aviator Xpro (Bayer, 25.05.2016); Osiris (06.06.2016)	NA	NA	428	YES	c3_470_5A3
c3_470_5B1	c3	CH CAMEDO	470	5	B	Switzerland	Eschikon field station	04.07.2016	2016	Input (Bayer, 06.04.2016); Aviator Xpro (Bayer, 25.05.2016); Osiris (06.06.2016)	NA	NA	379	YES	c3_470_5B1
c3_470_6A1	c3	CH CAMEDO	470	6	A	Switzerland	Eschikon field station	04.07.2016	2016	Input (Bayer, 06.04.2016); Aviator Xpro (Bayer, 25.05.2016); Osiris (06.06.2016)	NA	NA	1551	YES	c3_470_6A1
c3_470_6A2	c3	CH CAMEDO	470	6	A	Switzerland	Eschikon field station	04.07.2016	2016	Input (Bayer, 06.04.2016); Aviator Xpro (Bayer, 25.05.2016); Osiris (06.06.2016)	NA	NA	1533	YES	c3_470_6A2
c3_470_7A1	c3	CH CAMEDO	470	7	A	Switzerland	Eschikon field station	04.07.2016	2016	Input (Bayer, 06.04.2016); Aviator Xpro (Bayer, 25.05.2016); Osiris (06.06.2016)	ST16CH_3P15	SRR10728690	1318	NA	c3_470_7A1
c3_470_8A1	c3	CH CAMEDO	470	8	A	Switzerland	Eschikon field station	04.07.2016	2016	Input (Bayer, 06.04.2016); Aviator Xpro (Bayer, 25.05.2016); Osiris (06.06.2016)	NA	NA	1319	YES	c3_470_8A1
c3_470_8A2	c3	CH CAMEDO	470	8	A	Switzerland	Eschikon field station	04.07.2016	2016	Input (Bayer, 06.04.2016); Aviator Xpro (Bayer, 25.05.2016); Osiris (06.06.2016)	NA	NA	1283	YES	c3_470_8A2
c3_470_8B3	c3	CH CAMEDO	470	8	B	Switzerland	Eschikon field station	04.07.2016	2016	Input (Bayer, 06.04.2016); Aviator Xpro (Bayer, 25.05.2016); Osiris (06.06.2016)	NA	NA	786	YES	c3_470_8B3
c3_470_9B2	c3	CH CAMEDO	470	9	B	Switzerland	Eschikon field station	04.07.2016	2016	Input (Bayer, 06.04.2016); Aviator Xpro (Bayer, 25.05.2016); Osiris (06.06.2016)	NA	NA	903	YES	c3_470_9B2
c3_470_9B3	c3	CH CAMEDO	470	9	B	Switzerland	Eschikon field station	04.07.2016	2016	Input (Bayer, 06.04.2016); Aviator Xpro (Bayer, 25.05.2016); Osiris (06.06.2016)	NA	NA	1101	YES	c3_470_9B3
c3_51_10A2	c3	FOREL	51	10	A	Switzerland	Eschikon field station	04.07.2016	2016	Input (Bayer, 06.04.2016); Aviator Xpro (Bayer, 25.05.2016); Osiris (06.06.2016)	NA	NA	275	NA	c3_51_10A2
c3_51_10A4	c3	FOREL	51	10	A	Switzerland	Eschikon field station	04.07.2016	2016	Input (Bayer, 06.04.2016); Aviator Xpro (Bayer, 25.05.2016); Osiris (06.06.2016)	NA	NA	276	NA	c3_51_10A4
c3_51_10B2	c3	FOREL	51	10	B	Switzerland	Eschikon field station	04.07.2016	2016	Input (Bayer, 06.04.2016); Aviator Xpro (Bayer, 25.05.2016); Osiris (06.06.2016)	NA	NA	1424	YES	c3_51_10B2
c3_51_10B3	c3	FOREL	51	10	B	Switzerland	Eschikon field station	04.07.2016	2016	Input (Bayer, 06.04.2016); Aviator Xpro (Bayer, 25.05.2016); Osiris (06.06.2016)	NA	NA	1439	NA	c3_51_10B3
c3_51_11A3	c3	FOREL	51	11	A	Switzerland	Eschikon field station	04.07.2016	2016	Input (Bayer, 06.04.2016); Aviator Xpro (Bayer, 25.05.2016); Osiris (06.06.2016)	NA	NA	471	NA	c3_51_11A3
c3_51_11B1	c3	FOREL	51	11	B	Switzerland	Eschikon field station	04.07.2016	2016	Input (Bayer, 06.04.2016); Aviator Xpro (Bayer, 25.05.2016); Osiris (06.06.2016)	NA	NA	1056	NA	c3_51_11B1
c3_51_12A1	c3	FOREL	51	12	A	Switzerland	Eschikon field station	04.07.2016	2016	Input (Bayer, 06.04.2016); Aviator Xpro (Bayer, 25.05.2016); Osiris (06.06.2016)	NA	NA	1032	NA	c3_51_12A1
c3_51_12A2	c3	FOREL	51	12	A	Switzerland	Eschikon field station	04.07.2016	2016	Input (Bayer, 06.04.2016); Aviator Xpro (Bayer, 25.05.2016); Osiris (06.06.2016)	NA	NA	1103	YES	c3_51_12A2
c3_51_12A3	c3	FOREL	51	12	A	Switzerland	Eschikon field station	04.07.2016	2016	Input (Bayer, 06.04.2016); Aviator Xpro (Bayer, 25.05.2016); Osiris (06.06.2016)	NA	NA	1040	NA	c3_51_12A3
c3_51_12B1	c3	FOREL	51	12	B	Switzerland	Eschikon field station	04.07.2016	2016	Input (Bayer, 06.04.2016); Aviator Xpro (Bayer, 25.05.2016); Osiris (06.06.2016)	NA	NA	509	YES	c3_51_12B1
c3_51_12B2	c3	FOREL	51	12	B	Switzerland	Eschikon field station	04.07.2016	2016	Input (Bayer, 06.04.2016); Aviator Xpro (Bayer, 25.05.2016); Osiris (06.06.2016)	NA	NA	471	NA	c3_51_12B2
c3_51_12B3	c3	FOREL	51	12	B	Switzerland	Eschikon field station	04.07.2016	2016	Input (Bayer, 06.04.2016); Aviator Xpro (Bayer, 25.05.2016); Osiris (06.06.2016)	NA	NA	67	NA	c3_51_12B3
c3_51_13A1	c3	FOREL	51	13	A	Switzerland	Eschikon field station	04.07.2016	2016	Input (Bayer, 06.04.2016); Aviator Xpro (Bayer, 25.05.2016); Osiris (06.06.2016)	NA	NA	1516	NA	c3_51_13A1
c3_51_13A2	c3	FOREL	51	13	A	Switzerland	Eschikon field station	04.07.2016	2016	Input (Bayer, 06.04.2016); Aviator Xpro (Bayer, 25.05.2016); Osiris (06.06.2016)	NA	NA	1489	NA	c3_51_13A2
c3_51_13C1	c3	FOREL	51	13	C	Switzerland	Eschikon field station	04.07.2016	2016	Input (Bayer, 06.04.2016); Aviator Xpro (Bayer, 25.05.2016); Osiris (06.06.2016)	NA	NA	790	YES	c3_51_13C1
c3_51_14B1	c3	FOREL	51	14	B	Switzerland	Eschikon field station	04.07.2016	2016	Input (Bayer, 06.04.2016); Aviator Xpro (Bayer, 25.05.2016); Osiris (06.06.2016)	ST16CH_3E45	SRR10728727	1056	YES	c3_51_14B1
c3_51_14B2	c3	FOREL	51	14	B	Switzerland	Eschikon field station	04.07.2016	2016	Input (Bayer, 06.04.2016); Aviator Xpro (Bayer, 25.05.2016); Osiris (06.06.2016)	NA	NA	1189	YES	c3_51_14B2
c3_51_14B3	c3	FOREL	51	14	B	Switzerland	Eschikon field station	04.07.2016	2016	Input (Bayer, 06.04.2016); Aviator Xpro (Bayer, 25.05.2016); Osiris (06.06.2016)	NA	NA	1175	NA	c3_51_14B3
c3_51_15A1	c3	FOREL	51	15	A	Switzerland	Eschikon field station	04.07.2016	2016	Input (Bayer, 06.04.2016); Aviator Xpro (Bayer, 25.05.2016); Osiris (06.06.2016)	NA	NA	1454	YES	c3_51_15A1
c3_51_15A2	c3	FOREL	51	15	A	Switzerland	Eschikon field station	04.07.2016	2016	Input (Bayer, 06.04.2016); Aviator Xpro (Bayer, 25.05.2016); Osiris (06.06.2016)	NA	NA	1451	NA	c3_51_15A2
c3_51_15A3	c3	FOREL	51	15	A	Switzerland	Eschikon field station	04.07.2016	2016	Input (Bayer, 06.04.2016); Aviator Xpro (Bayer, 25.05.2016); Osiris (06.06.2016)	NA	NA	1451	NA	c3_51_15A3
c3_51_15B1	c3	FOREL	51	15	B	Switzerland	Eschikon field station	04.07.2016	2016	Input (Bayer, 06.04.2016); Aviator Xpro (Bayer, 25.05.2016); Osiris (06.06.2016)	NA	NA	454	YES	c3_51_15B1
c3_51_15B2	c3	FOREL	51	15	B	Switzerland	Eschikon field station	04.07.2016	2016	Input (Bayer, 06.04.2016); Aviator Xpro (Bayer, 25.05.2016); Osiris (06.06.2016)	NA	NA	1524	NA	c3_51_15B2
c3_51_16A1	c3	FOREL	51	16	A	Switzerland	Eschikon field station	04.07.2016	2016	Input (Bayer, 06.04.2016); Aviator Xpro (Bayer, 25.05.2016); Osiris (06.06.2016)	NA	NA	1088	NA	c3_51_16A1
c3_51_16A2	c3	FOREL	51	16	A	Switzerland	Eschikon field station	04.07.2016	2016	Input (Bayer, 06.04.2016); Aviator Xpro (Bayer, 25.05.2016); Osiris (06.06.2016)	NA	NA	880	YES	c3_51_16A2
c3_51_16B1	c3	FOREL	51	16	B	Switzerland	Eschikon field station	04.07.2016	2016	Input (Bayer, 06.04.2016); Aviator Xpro (Bayer, 25.05.2016); Osiris (06.06.2016)	NA	NA	785	YES	c3_51_16B1
c3_51_16B2	c3	FOREL	51	16	B	Switzerland	Eschikon field station	04.07.2016	2016	Input (Bayer, 06.04.2016); Aviator Xpro (Bayer, 25.05.2016); Osiris (06.06.2016)	NA	NA	731	YES	c3_51_16B2
c3_51_1B1	c3	FOREL	51	1	B	Switzerland	Eschikon field station	04.07.2016	2016	Input (Bayer, 06.04.2016); Aviator Xpro (Bayer, 25.05.2016); Osiris (06.06.2016)	NA	NA	1088	NA	c3_51_1B1
c3_51_2A2	c3	FOREL	51	2	A	Switzerland	Eschikon field station	04.07.2016	2016	Input (Bayer, 06.04.2016); Aviator Xpro (Bayer, 25.05.2016); Osiris (06.06.2016)	NA	NA	1549	YES	c3_51_2A2
c3_51_3A1	c3	FOREL	51	3	A	Switzerland	Eschikon field station	04.07.2016	2016	Input (Bayer, 06.04.2016); Aviator Xpro (Bayer, 25.05.2016); Osiris (06.06.2016)	NA	NA	251	YES	c3_51_3A1
c3_51_3A2	c3	FOREL	51	3	A	Switzerland	Eschikon field station	04.07.2016	2016	Input (Bayer, 06.04.2016); Aviator Xpro (Bayer, 25.05.2016); Osiris (06.06.2016)	NA	NA	417	NA	c3_51_3A2
c3_51_3A3	c3	FOREL	51	3	A	Switzerland	Eschikon field station	04.07.2016	2016	Input (Bayer, 06.04.2016); Aviator Xpro (Bayer, 25.05.2016); Osiris (06.06.2016)	ST16CH_3E9	SRR10728726	422	YES	c3_51_3A3
c3_51_3B1	c3	FOREL	51	3	B	Switzerland	Eschikon field station	04.07.2016	2016	Input (Bayer, 06.04.2016); Aviator Xpro (Bayer, 25.05.2016); Osiris (06.06.2016)	NA	NA	472	NA	c3_51_3B1
c3_51_3B2	c3	FOREL	51	3	B	Switzerland	Eschikon field station	04.07.2016	2016	Input (Bayer, 06.04.2016); Aviator Xpro (Bayer, 25.05.2016); Osiris (06.06.2016)	NA	NA	276	NA	c3_51_3B2
c3_51_3B3	c3	FOREL	51	3	B	Switzerland	Eschikon field station	04.07.2016	2016	Input (Bayer, 06.04.2016); Aviator Xpro (Bayer, 25.05.2016); Osiris (06.06.2016)	NA	NA	472	NA	c3_51_3B3
c3_51_4A1	c3	FOREL	51	4	A	Switzerland	Eschikon field station	04.07.2016	2016	Input (Bayer, 06.04.2016); Aviator Xpro (Bayer, 25.05.2016); Osiris (06.06.2016)	NA	NA	1215	NA	c3_51_4A1
c3_51_4A3	c3	FOREL	51	4	A	Switzerland	Eschikon field station	04.07.2016	2016	Input (Bayer, 06.04.2016); Aviator Xpro (Bayer, 25.05.2016); Osiris (06.06.2016)	NA	NA	505	NA	c3_51_4A3
c3_51_5A2	c3	FOREL	51	5	A	Switzerland	Eschikon field station	04.07.2016	2016	Input (Bayer, 06.04.2016); Aviator Xpro (Bayer, 25.05.2016); Osiris (06.06.2016)	NA	NA	1089	NA	c3_51_5A2
c3_51_5A3	c3	FOREL	51	5	A	Switzerland	Eschikon field station	04.07.2016	2016	Input (Bayer, 06.04.2016); Aviator Xpro (Bayer, 25.05.2016); Osiris (06.06.2016)	NA	NA	1168	YES	c3_51_5A3
c3_51_5B1	c3	FOREL	51	5	B	Switzerland	Eschikon field station	04.07.2016	2016	Input (Bayer, 06.04.2016); Aviator Xpro (Bayer, 25.05.2016); Osiris (06.06.2016)	NA	NA	1450	YES	c3_51_5B1
c3_51_5B2	c3	FOREL	51	5	B	Switzerland	Eschikon field station	04.07.2016	2016	Input (Bayer, 06.04.2016); Aviator Xpro (Bayer, 25.05.2016); Osiris (06.06.2016)	NA	NA	1072	YES	c3_51_5B2
c3_51_6A2	c3	FOREL	51	6	A	Switzerland	Eschikon field station	04.07.2016	2016	Input (Bayer, 06.04.2016); Aviator Xpro (Bayer, 25.05.2016); Osiris (06.06.2016)	NA	NA	1161	NA	c3_51_6A2
c3_51_6A3	c3	FOREL	51	6	A	Switzerland	Eschikon field station	04.07.2016	2016	Input (Bayer, 06.04.2016); Aviator Xpro (Bayer, 25.05.2016); Osiris (06.06.2016)	NA	NA	1105	NA	c3_51_6A3
c3_51_6B1	c3	FOREL	51	6	B	Switzerland	Eschikon field station	04.07.2016	2016	Input (Bayer, 06.04.2016); Aviator Xpro (Bayer, 25.05.2016); Osiris (06.06.2016)	NA	NA	843	YES	c3_51_6B1
c3_51_7A2	c3	FOREL	51	7	A	Switzerland	Eschikon field station	04.07.2016	2016	Input (Bayer, 06.04.2016); Aviator Xpro (Bayer, 25.05.2016); Osiris (06.06.2016)	NA	NA	326	YES	c3_51_7A2
c3_51_7A3	c3	FOREL	51	7	A	Switzerland	Eschikon field station	04.07.2016	2016	Input (Bayer, 06.04.2016); Aviator Xpro (Bayer, 25.05.2016); Osiris (06.06.2016)	NA	NA	1078	YES	c3_51_7A3
c3_51_8A1	c3	FOREL	51	8	A	Switzerland	Eschikon field station	04.07.2016	2016	Input (Bayer, 06.04.2016); Aviator Xpro (Bayer, 25.05.2016); Osiris (06.06.2016)	NA	NA	767	YES	c3_51_8A1
c3_51_8A3	c3	FOREL	51	8	A	Switzerland	Eschikon field station	04.07.2016	2016	Input (Bayer, 06.04.2016); Aviator Xpro (Bayer, 25.05.2016); Osiris (06.06.2016)	NA	NA	1331	YES	c3_51_8A3
c3_51_9A1	c3	FOREL	51	9	A	Switzerland	Eschikon field station	04.07.2016	2016	Input (Bayer, 06.04.2016); Aviator Xpro (Bayer, 25.05.2016); Osiris (06.06.2016)	NA	NA	712	NA	c3_51_9A1
c3_51_9A2	c3	FOREL	51	9	A	Switzerland	Eschikon field station	04.07.2016	2016	Input (Bayer, 06.04.2016); Aviator Xpro (Bayer, 25.05.2016); Osiris (06.06.2016)	NA	NA	614	NA	c3_51_9A2
c3_515_10A1	c3	RUNAL	515	10	A	Switzerland	Eschikon field station	04.07.2016	2016	Input (Bayer, 06.04.2016); Aviator Xpro (Bayer, 25.05.2016); Osiris (06.06.2016)	NA	NA	180	YES	c3_515_10A1
c3_515_10A2	c3	RUNAL	515	10	A	Switzerland	Eschikon field station	04.07.2016	2016	Input (Bayer, 06.04.2016); Aviator Xpro (Bayer, 25.05.2016); Osiris (06.06.2016)	NA	NA	1063	YES	c3_515_10A2
c3_515_10B3	c3	RUNAL	515	10	B	Switzerland	Eschikon field station	04.07.2016	2016	Input (Bayer, 06.04.2016); Aviator Xpro (Bayer, 25.05.2016); Osiris (06.06.2016)	NA	NA	302	YES	c3_515_10B3
c3_515_11A1	c3	RUNAL	515	11	A	Switzerland	Eschikon field station	04.07.2016	2016	Input (Bayer, 06.04.2016); Aviator Xpro (Bayer, 25.05.2016); Osiris (06.06.2016)	NA	NA	165	YES	c3_515_11A1
c3_515_11A2	c3	RUNAL	515	11	A	Switzerland	Eschikon field station	04.07.2016	2016	Input (Bayer, 06.04.2016); Aviator Xpro (Bayer, 25.05.2016); Osiris (06.06.2016)	NA	NA	93	NA	c3_515_11A2
c3_515_11B1	c3	RUNAL	515	11	B	Switzerland	Eschikon field station	04.07.2016	2016	Input (Bayer, 06.04.2016); Aviator Xpro (Bayer, 25.05.2016); Osiris (06.06.2016)	NA	NA	1218	YES	c3_515_11B1
c3_515_11C1	c3	RUNAL	515	11	C	Switzerland	Eschikon field station	04.07.2016	2016	Input (Bayer, 06.04.2016); Aviator Xpro (Bayer, 25.05.2016); Osiris (06.06.2016)	ST16CH_3Q36	SRR10728686	1154	YES	c3_515_11C1
c3_515_12A1	c3	RUNAL	515	12	A	Switzerland	Eschikon field station	04.07.2016	2016	Input (Bayer, 06.04.2016); Aviator Xpro (Bayer, 25.05.2016); Osiris (06.06.2016)	NA	NA	1237	YES	c3_515_12A1
c3_515_12A2	c3	RUNAL	515	12	A	Switzerland	Eschikon field station	04.07.2016	2016	Input (Bayer, 06.04.2016); Aviator Xpro (Bayer, 25.05.2016); Osiris (06.06.2016)	NA	NA	671	NA	c3_515_12A2
c3_515_12A3	c3	RUNAL	515	12	A	Switzerland	Eschikon field station	04.07.2016	2016	Input (Bayer, 06.04.2016); Aviator Xpro (Bayer, 25.05.2016); Osiris (06.06.2016)	NA	NA	671	NA	c3_515_12A3
c3_515_12B2	c3	RUNAL	515	12	B	Switzerland	Eschikon field station	04.07.2016	2016	Input (Bayer, 06.04.2016); Aviator Xpro (Bayer, 25.05.2016); Osiris (06.06.2016)	NA	NA	325	YES	c3_515_12B2
c3_515_13B3	c3	RUNAL	515	13	B	Switzerland	Eschikon field station	04.07.2016	2016	Input (Bayer, 06.04.2016); Aviator Xpro (Bayer, 25.05.2016); Osiris (06.06.2016)	NA	NA	215	NA	c3_515_13B3
c3_515_14B1	c3	RUNAL	515	14	B	Switzerland	Eschikon field station	04.07.2016	2016	Input (Bayer, 06.04.2016); Aviator Xpro (Bayer, 25.05.2016); Osiris (06.06.2016)	NA	NA	923	YES	c3_515_14B1
c3_515_14B3	c3	RUNAL	515	14	B	Switzerland	Eschikon field station	04.07.2016	2016	Input (Bayer, 06.04.2016); Aviator Xpro (Bayer, 25.05.2016); Osiris (06.06.2016)	NA	NA	615	YES	c3_515_14B3
c3_515_15A1	c3	RUNAL	515	15	A	Switzerland	Eschikon field station	04.07.2016	2016	Input (Bayer, 06.04.2016); Aviator Xpro (Bayer, 25.05.2016); Osiris (06.06.2016)	NA	NA	1004	YES	c3_515_15A1
c3_515_15A2	c3	RUNAL	515	15	A	Switzerland	Eschikon field station	04.07.2016	2016	Input (Bayer, 06.04.2016); Aviator Xpro (Bayer, 25.05.2016); Osiris (06.06.2016)	NA	NA	1065	NA	c3_515_15A2
c3_515_15B2	c3	RUNAL	515	15	B	Switzerland	Eschikon field station	04.07.2016	2016	Input (Bayer, 06.04.2016); Aviator Xpro (Bayer, 25.05.2016); Osiris (06.06.2016)	NA	NA	206	NA	c3_515_15B2
c3_515_15B3	c3	RUNAL	515	15	B	Switzerland	Eschikon field station	04.07.2016	2016	Input (Bayer, 06.04.2016); Aviator Xpro (Bayer, 25.05.2016); Osiris (06.06.2016)	NA	NA	74	NA	c3_515_15B3
c3_515_16B1	c3	RUNAL	515	16	B	Switzerland	Eschikon field station	04.07.2016	2016	Input (Bayer, 06.04.2016); Aviator Xpro (Bayer, 25.05.2016); Osiris (06.06.2016)	NA	NA	185	YES	c3_515_16B1
c3_515_16B2	c3	RUNAL	515	16	B	Switzerland	Eschikon field station	04.07.2016	2016	Input (Bayer, 06.04.2016); Aviator Xpro (Bayer, 25.05.2016); Osiris (06.06.2016)	NA	NA	181	YES	c3_515_16B2
c3_515_1B1	c3	RUNAL	515	1	B	Switzerland	Eschikon field station	04.07.2016	2016	Input (Bayer, 06.04.2016); Aviator Xpro (Bayer, 25.05.2016); Osiris (06.06.2016)	NA	NA	961	YES	c3_515_1B1
c3_515_1B2	c3	RUNAL	515	1	B	Switzerland	Eschikon field station	04.07.2016	2016	Input (Bayer, 06.04.2016); Aviator Xpro (Bayer, 25.05.2016); Osiris (06.06.2016)	NA	NA	403	YES	c3_515_1B2
c3_515_1B3	c3	RUNAL	515	1	B	Switzerland	Eschikon field station	04.07.2016	2016	Input (Bayer, 06.04.2016); Aviator Xpro (Bayer, 25.05.2016); Osiris (06.06.2016)	NA	NA	382	YES	c3_515_1B3
c3_515_2B1	c3	RUNAL	515	2	B	Switzerland	Eschikon field station	04.07.2016	2016	Input (Bayer, 06.04.2016); Aviator Xpro (Bayer, 25.05.2016); Osiris (06.06.2016)	NA	NA	1265	YES	c3_515_2B1
c3_515_2B2	c3	RUNAL	515	2	B	Switzerland	Eschikon field station	04.07.2016	2016	Input (Bayer, 06.04.2016); Aviator Xpro (Bayer, 25.05.2016); Osiris (06.06.2016)	NA	NA	597	NA	c3_515_2B2
c3_515_2B3	c3	RUNAL	515	2	B	Switzerland	Eschikon field station	04.07.2016	2016	Input (Bayer, 06.04.2016); Aviator Xpro (Bayer, 25.05.2016); Osiris (06.06.2016)	NA	NA	612	NA	c3_515_2B3
c3_515_3A2	c3	RUNAL	515	3	A	Switzerland	Eschikon field station	04.07.2016	2016	Input (Bayer, 06.04.2016); Aviator Xpro (Bayer, 25.05.2016); Osiris (06.06.2016)	ST16CH_3Q9	SRR10728685	1359	YES	c3_515_3A2
c3_515_3B1	c3	RUNAL	515	3	B	Switzerland	Eschikon field station	04.07.2016	2016	Input (Bayer, 06.04.2016); Aviator Xpro (Bayer, 25.05.2016); Osiris (06.06.2016)	NA	NA	1013	YES	c3_515_3B1
c3_515_4A1	c3	RUNAL	515	4	A	Switzerland	Eschikon field station	04.07.2016	2016	Input (Bayer, 06.04.2016); Aviator Xpro (Bayer, 25.05.2016); Osiris (06.06.2016)	NA	NA	779	YES	c3_515_4A1
c3_515_4A2	c3	RUNAL	515	4	A	Switzerland	Eschikon field station	04.07.2016	2016	Input (Bayer, 06.04.2016); Aviator Xpro (Bayer, 25.05.2016); Osiris (06.06.2016)	NA	NA	363	YES	c3_515_4A2
c3_515_4A3	c3	RUNAL	515	4	A	Switzerland	Eschikon field station	04.07.2016	2016	Input (Bayer, 06.04.2016); Aviator Xpro (Bayer, 25.05.2016); Osiris (06.06.2016)	NA	NA	359	NA	c3_515_4A3
c3_515_4B2	c3	RUNAL	515	4	B	Switzerland	Eschikon field station	04.07.2016	2016	Input (Bayer, 06.04.2016); Aviator Xpro (Bayer, 25.05.2016); Osiris (06.06.2016)	NA	NA	117	NA	c3_515_4B2
c3_515_4B3	c3	RUNAL	515	4	B	Switzerland	Eschikon field station	04.07.2016	2016	Input (Bayer, 06.04.2016); Aviator Xpro (Bayer, 25.05.2016); Osiris (06.06.2016)	NA	NA	117	NA	c3_515_4B3
c3_515_5A1	c3	RUNAL	515	5	A	Switzerland	Eschikon field station	04.07.2016	2016	Input (Bayer, 06.04.2016); Aviator Xpro (Bayer, 25.05.2016); Osiris (06.06.2016)	NA	NA	1435	YES	c3_515_5A1
c3_515_5B2	c3	RUNAL	515	5	B	Switzerland	Eschikon field station	04.07.2016	2016	Input (Bayer, 06.04.2016); Aviator Xpro (Bayer, 25.05.2016); Osiris (06.06.2016)	NA	NA	568	NA	c3_515_5B2
c3_515_6A3	c3	RUNAL	515	6	A	Switzerland	Eschikon field station	04.07.2016	2016	Input (Bayer, 06.04.2016); Aviator Xpro (Bayer, 25.05.2016); Osiris (06.06.2016)	NA	NA	409	NA	c3_515_6A3
c3_515_6B1	c3	RUNAL	515	6	B	Switzerland	Eschikon field station	04.07.2016	2016	Input (Bayer, 06.04.2016); Aviator Xpro (Bayer, 25.05.2016); Osiris (06.06.2016)	NA	NA	206	NA	c3_515_6B1
c3_515_6B2	c3	RUNAL	515	6	B	Switzerland	Eschikon field station	04.07.2016	2016	Input (Bayer, 06.04.2016); Aviator Xpro (Bayer, 25.05.2016); Osiris (06.06.2016)	NA	NA	73	YES	c3_515_6B2
c3_515_7A2	c3	RUNAL	515	7	A	Switzerland	Eschikon field station	04.07.2016	2016	Input (Bayer, 06.04.2016); Aviator Xpro (Bayer, 25.05.2016); Osiris (06.06.2016)	NA	NA	992	YES	c3_515_7A2
c3_515_7B3	c3	RUNAL	515	7	B	Switzerland	Eschikon field station	04.07.2016	2016	Input (Bayer, 06.04.2016); Aviator Xpro (Bayer, 25.05.2016); Osiris (06.06.2016)	ST16CH_3Q24	SRR10728687	137	NA	c3_515_7B3
c3_515_8B1	c3	RUNAL	515	8	B	Switzerland	Eschikon field station	04.07.2016	2016	Input (Bayer, 06.04.2016); Aviator Xpro (Bayer, 25.05.2016); Osiris (06.06.2016)	NA	NA	1429	YES	c3_515_8B1
c3_515_8B3	c3	RUNAL	515	8	B	Switzerland	Eschikon field station	04.07.2016	2016	Input (Bayer, 06.04.2016); Aviator Xpro (Bayer, 25.05.2016); Osiris (06.06.2016)	NA	NA	1436	NA	c3_515_8B3
c3_515_9B1	c3	RUNAL	515	9	B	Switzerland	Eschikon field station	04.07.2016	2016	Input (Bayer, 06.04.2016); Aviator Xpro (Bayer, 25.05.2016); Osiris (06.06.2016)	NA	NA	919	YES	c3_515_9B1
c3_517_11A1	c3	CH COMBIN	517	11	A	Switzerland	Eschikon field station	04.07.2016	2016	Input (Bayer, 06.04.2016); Aviator Xpro (Bayer, 25.05.2016); Osiris (06.06.2016)	NA	NA	1567	YES	c3_517_11A1
c3_517_11A2	c3	CH COMBIN	517	11	A	Switzerland	Eschikon field station	04.07.2016	2016	Input (Bayer, 06.04.2016); Aviator Xpro (Bayer, 25.05.2016); Osiris (06.06.2016)	NA	NA	1572	NA	c3_517_11A2
c3_517_11A3	c3	CH COMBIN	517	11	A	Switzerland	Eschikon field station	04.07.2016	2016	Input (Bayer, 06.04.2016); Aviator Xpro (Bayer, 25.05.2016); Osiris (06.06.2016)	NA	NA	1353	NA	c3_517_11A3
c3_517_11B1	c3	CH COMBIN	517	11	B	Switzerland	Eschikon field station	04.07.2016	2016	Input (Bayer, 06.04.2016); Aviator Xpro (Bayer, 25.05.2016); Osiris (06.06.2016)	NA	NA	1561	NA	c3_517_11B1
c3_517_11B2	c3	CH COMBIN	517	11	B	Switzerland	Eschikon field station	04.07.2016	2016	Input (Bayer, 06.04.2016); Aviator Xpro (Bayer, 25.05.2016); Osiris (06.06.2016)	NA	NA	1490	YES	c3_517_11B2
c3_517_12A1	c3	CH COMBIN	517	12	A	Switzerland	Eschikon field station	04.07.2016	2016	Input (Bayer, 06.04.2016); Aviator Xpro (Bayer, 25.05.2016); Osiris (06.06.2016)	ST16CH_3R32	SRR10728682	1457	NA	c3_517_12A1
c3_517_12B1	c3	CH COMBIN	517	12	B	Switzerland	Eschikon field station	04.07.2016	2016	Input (Bayer, 06.04.2016); Aviator Xpro (Bayer, 25.05.2016); Osiris (06.06.2016)	NA	NA	993	YES	c3_517_12B1
c3_517_12B3	c3	CH COMBIN	517	12	B	Switzerland	Eschikon field station	04.07.2016	2016	Input (Bayer, 06.04.2016); Aviator Xpro (Bayer, 25.05.2016); Osiris (06.06.2016)	NA	NA	1080	NA	c3_517_12B3
c3_517_12H1	c3	CH COMBIN	517	12	H	Switzerland	Eschikon field station	04.07.2016	2016	Input (Bayer, 06.04.2016); Aviator Xpro (Bayer, 25.05.2016); Osiris (06.06.2016)	NA	NA	1452	YES	c3_517_12H1
c3_517_13B3	c3	CH COMBIN	517	13	B	Switzerland	Eschikon field station	04.07.2016	2016	Input (Bayer, 06.04.2016); Aviator Xpro (Bayer, 25.05.2016); Osiris (06.06.2016)	NA	NA	1501	NA	c3_517_13B3
c3_517_15A1	c3	CH COMBIN	517	15	A	Switzerland	Eschikon field station	04.07.2016	2016	Input (Bayer, 06.04.2016); Aviator Xpro (Bayer, 25.05.2016); Osiris (06.06.2016)	NA	NA	130	YES	c3_517_15A1
c3_517_15B1	c3	CH COMBIN	517	15	B	Switzerland	Eschikon field station	04.07.2016	2016	Input (Bayer, 06.04.2016); Aviator Xpro (Bayer, 25.05.2016); Osiris (06.06.2016)	NA	NA	134	YES	c3_517_15B1
c3_517_16A3	c3	CH COMBIN	517	16	A	Switzerland	Eschikon field station	04.07.2016	2016	Input (Bayer, 06.04.2016); Aviator Xpro (Bayer, 25.05.2016); Osiris (06.06.2016)	NA	NA	495	NA	c3_517_16A3
c3_517_16B2	c3	CH COMBIN	517	16	B	Switzerland	Eschikon field station	04.07.2016	2016	Input (Bayer, 06.04.2016); Aviator Xpro (Bayer, 25.05.2016); Osiris (06.06.2016)	ST16CH_3R39	SRR10728681	1044	YES	c3_517_16B2
c3_517_1A1	c3	CH COMBIN	517	1	A	Switzerland	Eschikon field station	04.07.2016	2016	Input (Bayer, 06.04.2016); Aviator Xpro (Bayer, 25.05.2016); Osiris (06.06.2016)	ST16CH_3R1	SRR10728684	1042	NA	c3_517_1A1
c3_517_1B1	c3	CH COMBIN	517	1	B	Switzerland	Eschikon field station	04.07.2016	2016	Input (Bayer, 06.04.2016); Aviator Xpro (Bayer, 25.05.2016); Osiris (06.06.2016)	NA	NA	1571	YES	c3_517_1B1
c3_517_1B2	c3	CH COMBIN	517	1	B	Switzerland	Eschikon field station	04.07.2016	2016	Input (Bayer, 06.04.2016); Aviator Xpro (Bayer, 25.05.2016); Osiris (06.06.2016)	NA	NA	1281	NA	c3_517_1B2
c3_517_1B3	c3	CH COMBIN	517	1	B	Switzerland	Eschikon field station	04.07.2016	2016	Input (Bayer, 06.04.2016); Aviator Xpro (Bayer, 25.05.2016); Osiris (06.06.2016)	NA	NA	1069	YES	c3_517_1B3
c3_517_2A1	c3	CH COMBIN	517	2	A	Switzerland	Eschikon field station	04.07.2016	2016	Input (Bayer, 06.04.2016); Aviator Xpro (Bayer, 25.05.2016); Osiris (06.06.2016)	NA	NA	1051	NA	c3_517_2A1
c3_517_2A3	c3	CH COMBIN	517	2	A	Switzerland	Eschikon field station	04.07.2016	2016	Input (Bayer, 06.04.2016); Aviator Xpro (Bayer, 25.05.2016); Osiris (06.06.2016)	NA	NA	1068	NA	c3_517_2A3
c3_517_3A1	c3	CH COMBIN	517	3	A	Switzerland	Eschikon field station	04.07.2016	2016	Input (Bayer, 06.04.2016); Aviator Xpro (Bayer, 25.05.2016); Osiris (06.06.2016)	NA	NA	1456	NA	c3_517_3A1
c3_517_3A2	c3	CH COMBIN	517	3	A	Switzerland	Eschikon field station	04.07.2016	2016	Input (Bayer, 06.04.2016); Aviator Xpro (Bayer, 25.05.2016); Osiris (06.06.2016)	NA	NA	1507	NA	c3_517_3A2
c3_517_3A3	c3	CH COMBIN	517	3	A	Switzerland	Eschikon field station	04.07.2016	2016	Input (Bayer, 06.04.2016); Aviator Xpro (Bayer, 25.05.2016); Osiris (06.06.2016)	NA	NA	1500	NA	c3_517_3A3
c3_517_3B1	c3	CH COMBIN	517	3	B	Switzerland	Eschikon field station	04.07.2016	2016	Input (Bayer, 06.04.2016); Aviator Xpro (Bayer, 25.05.2016); Osiris (06.06.2016)	NA	NA	1334	YES	c3_517_3B1
c3_517_3B2	c3	CH COMBIN	517	3	B	Switzerland	Eschikon field station	04.07.2016	2016	Input (Bayer, 06.04.2016); Aviator Xpro (Bayer, 25.05.2016); Osiris (06.06.2016)	NA	NA	1087	NA	c3_517_3B2
c3_517_3B3	c3	CH COMBIN	517	3	B	Switzerland	Eschikon field station	04.07.2016	2016	Input (Bayer, 06.04.2016); Aviator Xpro (Bayer, 25.05.2016); Osiris (06.06.2016)	NA	NA	1282	YES	c3_517_3B3
c3_517_4A2	c3	CH COMBIN	517	4	A	Switzerland	Eschikon field station	04.07.2016	2016	Input (Bayer, 06.04.2016); Aviator Xpro (Bayer, 25.05.2016); Osiris (06.06.2016)	NA	NA	495	NA	c3_517_4A2
c3_517_4A3	c3	CH COMBIN	517	4	A	Switzerland	Eschikon field station	04.07.2016	2016	Input (Bayer, 06.04.2016); Aviator Xpro (Bayer, 25.05.2016); Osiris (06.06.2016)	NA	NA	368	YES	c3_517_4A3
c3_517_4B2	c3	CH COMBIN	517	4	B	Switzerland	Eschikon field station	04.07.2016	2016	Input (Bayer, 06.04.2016); Aviator Xpro (Bayer, 25.05.2016); Osiris (06.06.2016)	NA	NA	798	NA	c3_517_4B2
c3_517_4B3	c3	CH COMBIN	517	4	B	Switzerland	Eschikon field station	04.07.2016	2016	Input (Bayer, 06.04.2016); Aviator Xpro (Bayer, 25.05.2016); Osiris (06.06.2016)	NA	NA	305	YES	c3_517_4B3
c3_517_5A1	c3	CH COMBIN	517	5	A	Switzerland	Eschikon field station	04.07.2016	2016	Input (Bayer, 06.04.2016); Aviator Xpro (Bayer, 25.05.2016); Osiris (06.06.2016)	NA	NA	299	YES	c3_517_5A1
c3_517_8A1	c3	CH COMBIN	517	8	A	Switzerland	Eschikon field station	04.07.2016	2016	Input (Bayer, 06.04.2016); Aviator Xpro (Bayer, 25.05.2016); Osiris (06.06.2016)	NA	NA	1570	NA	c3_517_8A1
c3_517_9A1	c3	CH COMBIN	517	9	A	Switzerland	Eschikon field station	04.07.2016	2016	Input (Bayer, 06.04.2016); Aviator Xpro (Bayer, 25.05.2016); Osiris (06.06.2016)	NA	NA	1068	NA	c3_517_9A1
c3_517_9A3	c3	CH COMBIN	517	9	A	Switzerland	Eschikon field station	04.07.2016	2016	Input (Bayer, 06.04.2016); Aviator Xpro (Bayer, 25.05.2016); Osiris (06.06.2016)	NA	NA	1119	YES	c3_517_9A3
c3_517_9B1	c3	CH COMBIN	517	9	B	Switzerland	Eschikon field station	04.07.2016	2016	Input (Bayer, 06.04.2016); Aviator Xpro (Bayer, 25.05.2016); Osiris (06.06.2016)	ST16CH_3R26	SRR10728683	1050	NA	c3_517_9B1
c3_541_10A1	c3	AUBUSSON	541	10	A	Switzerland	Eschikon field station	04.07.2016	2016	Input (Bayer, 06.04.2016); Aviator Xpro (Bayer, 25.05.2016); Osiris (06.06.2016)	NA	NA	1011	YES	c3_541_10A1
c3_541_10A2	c3	AUBUSSON	541	10	A	Switzerland	Eschikon field station	04.07.2016	2016	Input (Bayer, 06.04.2016); Aviator Xpro (Bayer, 25.05.2016); Osiris (06.06.2016)	NA	NA	1222	NA	c3_541_10A2
c3_541_10A3	c3	AUBUSSON	541	10	A	Switzerland	Eschikon field station	04.07.2016	2016	Input (Bayer, 06.04.2016); Aviator Xpro (Bayer, 25.05.2016); Osiris (06.06.2016)	NA	NA	1022	YES	c3_541_10A3
c3_541_10B1	c3	AUBUSSON	541	10	B	Switzerland	Eschikon field station	04.07.2016	2016	Input (Bayer, 06.04.2016); Aviator Xpro (Bayer, 25.05.2016); Osiris (06.06.2016)	NA	NA	17	YES	c3_541_10B1
c3_541_11A1	c3	AUBUSSON	541	11	A	Switzerland	Eschikon field station	04.07.2016	2016	Input (Bayer, 06.04.2016); Aviator Xpro (Bayer, 25.05.2016); Osiris (06.06.2016)	NA	NA	247	YES	c3_541_11A1
c3_541_12A1	c3	AUBUSSON	541	12	A	Switzerland	Eschikon field station	04.07.2016	2016	Input (Bayer, 06.04.2016); Aviator Xpro (Bayer, 25.05.2016); Osiris (06.06.2016)	NA	NA	1226	YES	c3_541_12A1
c3_541_13A1	c3	AUBUSSON	541	13	A	Switzerland	Eschikon field station	04.07.2016	2016	Input (Bayer, 06.04.2016); Aviator Xpro (Bayer, 25.05.2016); Osiris (06.06.2016)	NA	NA	167	YES	c3_541_13A1
c3_541_14A1	c3	AUBUSSON	541	14	A	Switzerland	Eschikon field station	04.07.2016	2016	Input (Bayer, 06.04.2016); Aviator Xpro (Bayer, 25.05.2016); Osiris (06.06.2016)	NA	NA	164	YES	c3_541_14A1
c3_541_14B1	c3	AUBUSSON	541	14	B	Switzerland	Eschikon field station	04.07.2016	2016	Input (Bayer, 06.04.2016); Aviator Xpro (Bayer, 25.05.2016); Osiris (06.06.2016)	NA	NA	342	YES	c3_541_14B1
c3_541_14B3	c3	AUBUSSON	541	14	B	Switzerland	Eschikon field station	04.07.2016	2016	Input (Bayer, 06.04.2016); Aviator Xpro (Bayer, 25.05.2016); Osiris (06.06.2016)	NA	NA	1039	YES	c3_541_14B3
c3_541_15A1	c3	AUBUSSON	541	15	A	Switzerland	Eschikon field station	04.07.2016	2016	Input (Bayer, 06.04.2016); Aviator Xpro (Bayer, 25.05.2016); Osiris (06.06.2016)	NA	NA	220	YES	c3_541_15A1
c3_541_16A1	c3	AUBUSSON	541	16	A	Switzerland	Eschikon field station	04.07.2016	2016	Input (Bayer, 06.04.2016); Aviator Xpro (Bayer, 25.05.2016); Osiris (06.06.2016)	NA	NA	1426	YES	c3_541_16A1
c3_541_16B2	c3	AUBUSSON	541	16	B	Switzerland	Eschikon field station	04.07.2016	2016	Input (Bayer, 06.04.2016); Aviator Xpro (Bayer, 25.05.2016); Osiris (06.06.2016)	NA	NA	756	YES	c3_541_16B2
c3_541_1A1	c3	AUBUSSON	541	1	A	Switzerland	Eschikon field station	04.07.2016	2016	Input (Bayer, 06.04.2016); Aviator Xpro (Bayer, 25.05.2016); Osiris (06.06.2016)	NA	NA	1164	NA	c3_541_1A1
c3_541_1A2	c3	AUBUSSON	541	1	A	Switzerland	Eschikon field station	04.07.2016	2016	Input (Bayer, 06.04.2016); Aviator Xpro (Bayer, 25.05.2016); Osiris (06.06.2016)	NA	NA	1196	YES	c3_541_1A2
c3_541_1B1	c3	AUBUSSON	541	1	B	Switzerland	Eschikon field station	04.07.2016	2016	Input (Bayer, 06.04.2016); Aviator Xpro (Bayer, 25.05.2016); Osiris (06.06.2016)	NA	NA	770	YES	c3_541_1B1
c3_541_2B1	c3	AUBUSSON	541	2	B	Switzerland	Eschikon field station	04.07.2016	2016	Input (Bayer, 06.04.2016); Aviator Xpro (Bayer, 25.05.2016); Osiris (06.06.2016)	NA	NA	1229	NA	c3_541_2B1
c3_541_3A1	c3	AUBUSSON	541	3	A	Switzerland	Eschikon field station	04.07.2016	2016	Input (Bayer, 06.04.2016); Aviator Xpro (Bayer, 25.05.2016); Osiris (06.06.2016)	NA	NA	31	YES	c3_541_3A1
c3_541_3A2	c3	AUBUSSON	541	3	A	Switzerland	Eschikon field station	04.07.2016	2016	Input (Bayer, 06.04.2016); Aviator Xpro (Bayer, 25.05.2016); Osiris (06.06.2016)	NA	NA	250	YES	c3_541_3A2
c3_541_4A1	c3	AUBUSSON	541	4	A	Switzerland	Eschikon field station	04.07.2016	2016	Input (Bayer, 06.04.2016); Aviator Xpro (Bayer, 25.05.2016); Osiris (06.06.2016)	NA	NA	1547	YES	c3_541_4A1
c3_541_4B1	c3	AUBUSSON	541	4	B	Switzerland	Eschikon field station	04.07.2016	2016	Input (Bayer, 06.04.2016); Aviator Xpro (Bayer, 25.05.2016); Osiris (06.06.2016)	NA	NA	1440	YES	c3_541_4B1
c3_541_5A1	c3	AUBUSSON	541	5	A	Switzerland	Eschikon field station	04.07.2016	2016	Input (Bayer, 06.04.2016); Aviator Xpro (Bayer, 25.05.2016); Osiris (06.06.2016)	NA	NA	645	NA	c3_541_5A1
c3_541_5A2	c3	AUBUSSON	541	5	A	Switzerland	Eschikon field station	04.07.2016	2016	Input (Bayer, 06.04.2016); Aviator Xpro (Bayer, 25.05.2016); Osiris (06.06.2016)	NA	NA	645	NA	c3_541_5A2
c3_541_5A3	c3	AUBUSSON	541	5	A	Switzerland	Eschikon field station	04.07.2016	2016	Input (Bayer, 06.04.2016); Aviator Xpro (Bayer, 25.05.2016); Osiris (06.06.2016)	NA	NA	647	NA	c3_541_5A3
c3_541_5B1	c3	AUBUSSON	541	5	B	Switzerland	Eschikon field station	04.07.2016	2016	Input (Bayer, 06.04.2016); Aviator Xpro (Bayer, 25.05.2016); Osiris (06.06.2016)	NA	NA	235	YES	c3_541_5B1
c3_541_6A1	c3	AUBUSSON	541	6	A	Switzerland	Eschikon field station	04.07.2016	2016	Input (Bayer, 06.04.2016); Aviator Xpro (Bayer, 25.05.2016); Osiris (06.06.2016)	NA	NA	1140	YES	c3_541_6A1
c3_541_6A2	c3	AUBUSSON	541	6	A	Switzerland	Eschikon field station	04.07.2016	2016	Input (Bayer, 06.04.2016); Aviator Xpro (Bayer, 25.05.2016); Osiris (06.06.2016)	NA	NA	1199	YES	c3_541_6A2
c3_541_6B1	c3	AUBUSSON	541	6	B	Switzerland	Eschikon field station	04.07.2016	2016	Input (Bayer, 06.04.2016); Aviator Xpro (Bayer, 25.05.2016); Osiris (06.06.2016)	NA	NA	870	YES	c3_541_6B1
c3_541_7A1	c3	AUBUSSON	541	7	A	Switzerland	Eschikon field station	04.07.2016	2016	Input (Bayer, 06.04.2016); Aviator Xpro (Bayer, 25.05.2016); Osiris (06.06.2016)	NA	NA	12	YES	c3_541_7A1
c3_541_7A2	c3	AUBUSSON	541	7	A	Switzerland	Eschikon field station	04.07.2016	2016	Input (Bayer, 06.04.2016); Aviator Xpro (Bayer, 25.05.2016); Osiris (06.06.2016)	NA	NA	13	YES	c3_541_7A2
c3_541_7A3	c3	AUBUSSON	541	7	A	Switzerland	Eschikon field station	04.07.2016	2016	Input (Bayer, 06.04.2016); Aviator Xpro (Bayer, 25.05.2016); Osiris (06.06.2016)	NA	NA	14	YES	c3_541_7A3
c3_541_7B1	c3	AUBUSSON	541	7	B	Switzerland	Eschikon field station	04.07.2016	2016	Input (Bayer, 06.04.2016); Aviator Xpro (Bayer, 25.05.2016); Osiris (06.06.2016)	NA	NA	91	YES	c3_541_7B1
c3_541_7B2	c3	AUBUSSON	541	7	B	Switzerland	Eschikon field station	04.07.2016	2016	Input (Bayer, 06.04.2016); Aviator Xpro (Bayer, 25.05.2016); Osiris (06.06.2016)	NA	NA	55	YES	c3_541_7B2
c3_541_8A1	c3	AUBUSSON	541	8	A	Switzerland	Eschikon field station	04.07.2016	2016	Input (Bayer, 06.04.2016); Aviator Xpro (Bayer, 25.05.2016); Osiris (06.06.2016)	NA	NA	806	YES	c3_541_8A1
c3_541_8A3	c3	AUBUSSON	541	8	A	Switzerland	Eschikon field station	04.07.2016	2016	Input (Bayer, 06.04.2016); Aviator Xpro (Bayer, 25.05.2016); Osiris (06.06.2016)	NA	NA	1288	YES	c3_541_8A3
c3_541_9A1	c3	AUBUSSON	541	9	A	Switzerland	Eschikon field station	04.07.2016	2016	Input (Bayer, 06.04.2016); Aviator Xpro (Bayer, 25.05.2016); Osiris (06.06.2016)	NA	NA	385	YES	c3_541_9A1
c3_541_9A2	c3	AUBUSSON	541	9	A	Switzerland	Eschikon field station	04.07.2016	2016	Input (Bayer, 06.04.2016); Aviator Xpro (Bayer, 25.05.2016); Osiris (06.06.2016)	NA	NA	389	YES	c3_541_9A2
c3_541_9A3	c3	AUBUSSON	541	9	A	Switzerland	Eschikon field station	04.07.2016	2016	Input (Bayer, 06.04.2016); Aviator Xpro (Bayer, 25.05.2016); Osiris (06.06.2016)	NA	NA	444	YES	c3_541_9A3
c3_541_9B1	c3	AUBUSSON	541	9	B	Switzerland	Eschikon field station	04.07.2016	2016	Input (Bayer, 06.04.2016); Aviator Xpro (Bayer, 25.05.2016); Osiris (06.06.2016)	NA	NA	1038	YES	c3_541_9B1
c3_541_9B2	c3	AUBUSSON	541	9	B	Switzerland	Eschikon field station	04.07.2016	2016	Input (Bayer, 06.04.2016); Aviator Xpro (Bayer, 25.05.2016); Osiris (06.06.2016)	NA	NA	29	YES	c3_541_9B2
c3_571_10A2	c3	ZINAL	571	10	A	Switzerland	Eschikon field station	04.07.2016	2016	Input (Bayer, 06.04.2016); Aviator Xpro (Bayer, 25.05.2016); Osiris (06.06.2016)	NA	NA	1209	YES	c3_571_10A2
c3_571_11B3	c3	ZINAL	571	11	B	Switzerland	Eschikon field station	04.07.2016	2016	Input (Bayer, 06.04.2016); Aviator Xpro (Bayer, 25.05.2016); Osiris (06.06.2016)	NA	NA	984	YES	c3_571_11B3
c3_571_12A1	c3	ZINAL	571	12	A	Switzerland	Eschikon field station	04.07.2016	2016	Input (Bayer, 06.04.2016); Aviator Xpro (Bayer, 25.05.2016); Osiris (06.06.2016)	NA	NA	397	YES	c3_571_12A1
c3_571_12A3	c3	ZINAL	571	12	A	Switzerland	Eschikon field station	04.07.2016	2016	Input (Bayer, 06.04.2016); Aviator Xpro (Bayer, 25.05.2016); Osiris (06.06.2016)	NA	NA	1250	YES	c3_571_12A3
c3_571_13A1	c3	ZINAL	571	13	A	Switzerland	Eschikon field station	04.07.2016	2016	Input (Bayer, 06.04.2016); Aviator Xpro (Bayer, 25.05.2016); Osiris (06.06.2016)	NA	NA	1256	YES	c3_571_13A1
c3_571_13A2	c3	ZINAL	571	13	A	Switzerland	Eschikon field station	04.07.2016	2016	Input (Bayer, 06.04.2016); Aviator Xpro (Bayer, 25.05.2016); Osiris (06.06.2016)	NA	NA	999	YES	c3_571_13A2
c3_571_13B1	c3	ZINAL	571	13	B	Switzerland	Eschikon field station	04.07.2016	2016	Input (Bayer, 06.04.2016); Aviator Xpro (Bayer, 25.05.2016); Osiris (06.06.2016)	NA	NA	1262	YES	c3_571_13B1
c3_571_14A1	c3	ZINAL	571	14	A	Switzerland	Eschikon field station	04.07.2016	2016	Input (Bayer, 06.04.2016); Aviator Xpro (Bayer, 25.05.2016); Osiris (06.06.2016)	NA	NA	412	YES	c3_571_14A1
c3_571_14B1	c3	ZINAL	571	14	B	Switzerland	Eschikon field station	04.07.2016	2016	Input (Bayer, 06.04.2016); Aviator Xpro (Bayer, 25.05.2016); Osiris (06.06.2016)	NA	NA	162	YES	c3_571_14B1
c3_571_14B2	c3	ZINAL	571	14	B	Switzerland	Eschikon field station	04.07.2016	2016	Input (Bayer, 06.04.2016); Aviator Xpro (Bayer, 25.05.2016); Osiris (06.06.2016)	NA	NA	195	YES	c3_571_14B2
c3_571_14B3	c3	ZINAL	571	14	B	Switzerland	Eschikon field station	04.07.2016	2016	Input (Bayer, 06.04.2016); Aviator Xpro (Bayer, 25.05.2016); Osiris (06.06.2016)	NA	NA	171	YES	c3_571_14B3
c3_571_15A1	c3	ZINAL	571	15	A	Switzerland	Eschikon field station	04.07.2016	2016	Input (Bayer, 06.04.2016); Aviator Xpro (Bayer, 25.05.2016); Osiris (06.06.2016)	NA	NA	895	YES	c3_571_15A1
c3_571_15A2	c3	ZINAL	571	15	A	Switzerland	Eschikon field station	04.07.2016	2016	Input (Bayer, 06.04.2016); Aviator Xpro (Bayer, 25.05.2016); Osiris (06.06.2016)	NA	NA	849	NA	c3_571_15A2
c3_571_15B2	c3	ZINAL	571	15	B	Switzerland	Eschikon field station	04.07.2016	2016	Input (Bayer, 06.04.2016); Aviator Xpro (Bayer, 25.05.2016); Osiris (06.06.2016)	NA	NA	163	YES	c3_571_15B2
c3_571_16A1	c3	ZINAL	571	16	A	Switzerland	Eschikon field station	04.07.2016	2016	Input (Bayer, 06.04.2016); Aviator Xpro (Bayer, 25.05.2016); Osiris (06.06.2016)	NA	NA	792	YES	c3_571_16A1
c3_571_16A2	c3	ZINAL	571	16	A	Switzerland	Eschikon field station	04.07.2016	2016	Input (Bayer, 06.04.2016); Aviator Xpro (Bayer, 25.05.2016); Osiris (06.06.2016)	NA	NA	792	NA	c3_571_16A2
c3_571_16B3	c3	ZINAL	571	16	B	Switzerland	Eschikon field station	04.07.2016	2016	Input (Bayer, 06.04.2016); Aviator Xpro (Bayer, 25.05.2016); Osiris (06.06.2016)	NA	NA	1020	YES	c3_571_16B3
c3_571_1A2	c3	ZINAL	571	1	A	Switzerland	Eschikon field station	04.07.2016	2016	Input (Bayer, 06.04.2016); Aviator Xpro (Bayer, 25.05.2016); Osiris (06.06.2016)	ST16CH_3S1	SRR10728679	188	NA	c3_571_1A2
c3_571_1A3	c3	ZINAL	571	1	A	Switzerland	Eschikon field station	04.07.2016	2016	Input (Bayer, 06.04.2016); Aviator Xpro (Bayer, 25.05.2016); Osiris (06.06.2016)	NA	NA	63	YES	c3_571_1A3
c3_571_1B2	c3	ZINAL	571	1	B	Switzerland	Eschikon field station	04.07.2016	2016	Input (Bayer, 06.04.2016); Aviator Xpro (Bayer, 25.05.2016); Osiris (06.06.2016)	NA	NA	1114	YES	c3_571_1B2
c3_571_1B3	c3	ZINAL	571	1	B	Switzerland	Eschikon field station	04.07.2016	2016	Input (Bayer, 06.04.2016); Aviator Xpro (Bayer, 25.05.2016); Osiris (06.06.2016)	NA	NA	544	YES	c3_571_1B3
c3_571_2A1	c3	ZINAL	571	2	A	Switzerland	Eschikon field station	04.07.2016	2016	Input (Bayer, 06.04.2016); Aviator Xpro (Bayer, 25.05.2016); Osiris (06.06.2016)	NA	NA	15	YES	c3_571_2A1
c3_571_2A2	c3	ZINAL	571	2	A	Switzerland	Eschikon field station	04.07.2016	2016	Input (Bayer, 06.04.2016); Aviator Xpro (Bayer, 25.05.2016); Osiris (06.06.2016)	NA	NA	132	YES	c3_571_2A2
c3_571_2A3	c3	ZINAL	571	2	A	Switzerland	Eschikon field station	04.07.2016	2016	Input (Bayer, 06.04.2016); Aviator Xpro (Bayer, 25.05.2016); Osiris (06.06.2016)	NA	NA	139	YES	c3_571_2A3
c3_571_2B3	c3	ZINAL	571	2	B	Switzerland	Eschikon field station	04.07.2016	2016	Input (Bayer, 06.04.2016); Aviator Xpro (Bayer, 25.05.2016); Osiris (06.06.2016)	NA	NA	884	YES	c3_571_2B3
c3_571_3B1	c3	ZINAL	571	3	B	Switzerland	Eschikon field station	04.07.2016	2016	Input (Bayer, 06.04.2016); Aviator Xpro (Bayer, 25.05.2016); Osiris (06.06.2016)	ST16CH_3S9	SRR10728678	1230	NA	c3_571_3B1
c3_571_3B2	c3	ZINAL	571	3	B	Switzerland	Eschikon field station	04.07.2016	2016	Input (Bayer, 06.04.2016); Aviator Xpro (Bayer, 25.05.2016); Osiris (06.06.2016)	NA	NA	296	YES	c3_571_3B2
c3_571_4A1	c3	ZINAL	571	4	A	Switzerland	Eschikon field station	04.07.2016	2016	Input (Bayer, 06.04.2016); Aviator Xpro (Bayer, 25.05.2016); Osiris (06.06.2016)	NA	NA	109	YES	c3_571_4A1
c3_571_4A2	c3	ZINAL	571	4	A	Switzerland	Eschikon field station	04.07.2016	2016	Input (Bayer, 06.04.2016); Aviator Xpro (Bayer, 25.05.2016); Osiris (06.06.2016)	NA	NA	118	YES	c3_571_4A2
c3_571_4B1	c3	ZINAL	571	4	B	Switzerland	Eschikon field station	04.07.2016	2016	Input (Bayer, 06.04.2016); Aviator Xpro (Bayer, 25.05.2016); Osiris (06.06.2016)	NA	NA	1258	YES	c3_571_4B1
c3_571_5B1	c3	ZINAL	571	5	B	Switzerland	Eschikon field station	04.07.2016	2016	Input (Bayer, 06.04.2016); Aviator Xpro (Bayer, 25.05.2016); Osiris (06.06.2016)	NA	NA	1425	NA	c3_571_5B1
c3_571_6B2	c3	ZINAL	571	6	B	Switzerland	Eschikon field station	04.07.2016	2016	Input (Bayer, 06.04.2016); Aviator Xpro (Bayer, 25.05.2016); Osiris (06.06.2016)	NA	NA	306	YES	c3_571_6B2
c3_571_7A3	c3	ZINAL	571	7	A	Switzerland	Eschikon field station	04.07.2016	2016	Input (Bayer, 06.04.2016); Aviator Xpro (Bayer, 25.05.2016); Osiris (06.06.2016)	NA	NA	1548	NA	c3_571_7A3
c3_571_7B1	c3	ZINAL	571	7	B	Switzerland	Eschikon field station	04.07.2016	2016	Input (Bayer, 06.04.2016); Aviator Xpro (Bayer, 25.05.2016); Osiris (06.06.2016)	NA	NA	1229	YES	c3_571_7B1
c3_571_8A1	c3	ZINAL	571	8	A	Switzerland	Eschikon field station	04.07.2016	2016	Input (Bayer, 06.04.2016); Aviator Xpro (Bayer, 25.05.2016); Osiris (06.06.2016)	NA	NA	344	YES	c3_571_8A1
c3_571_8A2	c3	ZINAL	571	8	A	Switzerland	Eschikon field station	04.07.2016	2016	Input (Bayer, 06.04.2016); Aviator Xpro (Bayer, 25.05.2016); Osiris (06.06.2016)	NA	NA	25	YES	c3_571_8A2
c3_571_8A3	c3	ZINAL	571	8	A	Switzerland	Eschikon field station	04.07.2016	2016	Input (Bayer, 06.04.2016); Aviator Xpro (Bayer, 25.05.2016); Osiris (06.06.2016)	NA	NA	935	YES	c3_571_8A3
c3_571_8B2	c3	ZINAL	571	8	B	Switzerland	Eschikon field station	04.07.2016	2016	Input (Bayer, 06.04.2016); Aviator Xpro (Bayer, 25.05.2016); Osiris (06.06.2016)	NA	NA	304	YES	c3_571_8B2
c3_571_8B3	c3	ZINAL	571	8	B	Switzerland	Eschikon field station	04.07.2016	2016	Input (Bayer, 06.04.2016); Aviator Xpro (Bayer, 25.05.2016); Osiris (06.06.2016)	NA	NA	739	YES	c3_571_8B3
c3_571_9A1	c3	ZINAL	571	9	A	Switzerland	Eschikon field station	04.07.2016	2016	Input (Bayer, 06.04.2016); Aviator Xpro (Bayer, 25.05.2016); Osiris (06.06.2016)	NA	NA	10	YES	c3_571_9A1
c3_571_9B1	c3	ZINAL	571	9	B	Switzerland	Eschikon field station	04.07.2016	2016	Input (Bayer, 06.04.2016); Aviator Xpro (Bayer, 25.05.2016); Osiris (06.06.2016)	NA	NA	777	YES	c3_571_9B1
c3_571_9B2	c3	ZINAL	571	9	B	Switzerland	Eschikon field station	04.07.2016	2016	Input (Bayer, 06.04.2016); Aviator Xpro (Bayer, 25.05.2016); Osiris (06.06.2016)	NA	NA	701	YES	c3_571_9B2
c3_571_9B3	c3	ZINAL	571	9	B	Switzerland	Eschikon field station	04.07.2016	2016	Input (Bayer, 06.04.2016); Aviator Xpro (Bayer, 25.05.2016); Osiris (06.06.2016)	NA	NA	365	YES	c3_571_9B3
c3_580_10A1	c3	AROBASE	580	10	A	Switzerland	Eschikon field station	04.07.2016	2016	Input (Bayer, 06.04.2016); Aviator Xpro (Bayer, 25.05.2016); Osiris (06.06.2016)	NA	NA	1053	NA	c3_580_10A1
c3_580_10A2	c3	AROBASE	580	10	A	Switzerland	Eschikon field station	04.07.2016	2016	Input (Bayer, 06.04.2016); Aviator Xpro (Bayer, 25.05.2016); Osiris (06.06.2016)	NA	NA	755	NA	c3_580_10A2
c3_580_10A3	c3	AROBASE	580	10	A	Switzerland	Eschikon field station	04.07.2016	2016	Input (Bayer, 06.04.2016); Aviator Xpro (Bayer, 25.05.2016); Osiris (06.06.2016)	NA	NA	491	YES	c3_580_10A3
c3_580_10B1	c3	AROBASE	580	10	B	Switzerland	Eschikon field station	04.07.2016	2016	Input (Bayer, 06.04.2016); Aviator Xpro (Bayer, 25.05.2016); Osiris (06.06.2016)	NA	NA	221	YES	c3_580_10B1
c3_580_10B2	c3	AROBASE	580	10	B	Switzerland	Eschikon field station	04.07.2016	2016	Input (Bayer, 06.04.2016); Aviator Xpro (Bayer, 25.05.2016); Osiris (06.06.2016)	NA	NA	710	YES	c3_580_10B2
c3_580_11A1	c3	AROBASE	580	11	A	Switzerland	Eschikon field station	04.07.2016	2016	Input (Bayer, 06.04.2016); Aviator Xpro (Bayer, 25.05.2016); Osiris (06.06.2016)	NA	NA	834	NA	c3_580_11A1
c3_580_12A1	c3	AROBASE	580	12	A	Switzerland	Eschikon field station	04.07.2016	2016	Input (Bayer, 06.04.2016); Aviator Xpro (Bayer, 25.05.2016); Osiris (06.06.2016)	NA	NA	1338	YES	c3_580_12A1
c3_580_12A2	c3	AROBASE	580	12	A	Switzerland	Eschikon field station	04.07.2016	2016	Input (Bayer, 06.04.2016); Aviator Xpro (Bayer, 25.05.2016); Osiris (06.06.2016)	NA	NA	692	YES	c3_580_12A2
c3_580_13A1	c3	AROBASE	580	13	A	Switzerland	Eschikon field station	04.07.2016	2016	Input (Bayer, 06.04.2016); Aviator Xpro (Bayer, 25.05.2016); Osiris (06.06.2016)	NA	NA	1527	YES	c3_580_13A1
c3_580_13A2	c3	AROBASE	580	13	A	Switzerland	Eschikon field station	04.07.2016	2016	Input (Bayer, 06.04.2016); Aviator Xpro (Bayer, 25.05.2016); Osiris (06.06.2016)	NA	NA	1062	YES	c3_580_13A2
c3_580_13A3	c3	AROBASE	580	13	A	Switzerland	Eschikon field station	04.07.2016	2016	Input (Bayer, 06.04.2016); Aviator Xpro (Bayer, 25.05.2016); Osiris (06.06.2016)	NA	NA	805	YES	c3_580_13A3
c3_580_13B1	c3	AROBASE	580	13	B	Switzerland	Eschikon field station	04.07.2016	2016	Input (Bayer, 06.04.2016); Aviator Xpro (Bayer, 25.05.2016); Osiris (06.06.2016)	NA	NA	496	NA	c3_580_13B1
c3_580_13B2	c3	AROBASE	580	13	B	Switzerland	Eschikon field station	04.07.2016	2016	Input (Bayer, 06.04.2016); Aviator Xpro (Bayer, 25.05.2016); Osiris (06.06.2016)	NA	NA	89	YES	c3_580_13B2
c3_580_13B3	c3	AROBASE	580	13	B	Switzerland	Eschikon field station	04.07.2016	2016	Input (Bayer, 06.04.2016); Aviator Xpro (Bayer, 25.05.2016); Osiris (06.06.2016)	NA	NA	465	NA	c3_580_13B3
c3_580_14A1	c3	AROBASE	580	14	A	Switzerland	Eschikon field station	04.07.2016	2016	Input (Bayer, 06.04.2016); Aviator Xpro (Bayer, 25.05.2016); Osiris (06.06.2016)	NA	NA	832	NA	c3_580_14A1
c3_580_14A2	c3	AROBASE	580	14	A	Switzerland	Eschikon field station	04.07.2016	2016	Input (Bayer, 06.04.2016); Aviator Xpro (Bayer, 25.05.2016); Osiris (06.06.2016)	NA	NA	1208	YES	c3_580_14A2
c3_580_14B1	c3	AROBASE	580	14	B	Switzerland	Eschikon field station	04.07.2016	2016	Input (Bayer, 06.04.2016); Aviator Xpro (Bayer, 25.05.2016); Osiris (06.06.2016)	NA	NA	1053	YES	c3_580_14B1
c3_580_15A1	c3	AROBASE	580	15	A	Switzerland	Eschikon field station	04.07.2016	2016	Input (Bayer, 06.04.2016); Aviator Xpro (Bayer, 25.05.2016); Osiris (06.06.2016)	NA	NA	704	YES	c3_580_15A1
c3_580_15A2	c3	AROBASE	580	15	A	Switzerland	Eschikon field station	04.07.2016	2016	Input (Bayer, 06.04.2016); Aviator Xpro (Bayer, 25.05.2016); Osiris (06.06.2016)	NA	NA	467	NA	c3_580_15A2
c3_580_15A3	c3	AROBASE	580	15	A	Switzerland	Eschikon field station	04.07.2016	2016	Input (Bayer, 06.04.2016); Aviator Xpro (Bayer, 25.05.2016); Osiris (06.06.2016)	NA	NA	1021	NA	c3_580_15A3
c3_580_15B2	c3	AROBASE	580	15	B	Switzerland	Eschikon field station	04.07.2016	2016	Input (Bayer, 06.04.2016); Aviator Xpro (Bayer, 25.05.2016); Osiris (06.06.2016)	NA	NA	1506	NA	c3_580_15B2
c3_580_16B1	c3	AROBASE	580	16	B	Switzerland	Eschikon field station	04.07.2016	2016	Input (Bayer, 06.04.2016); Aviator Xpro (Bayer, 25.05.2016); Osiris (06.06.2016)	NA	NA	1507	NA	c3_580_16B1
c3_580_1A1	c3	AROBASE	580	1	A	Switzerland	Eschikon field station	04.07.2016	2016	Input (Bayer, 06.04.2016); Aviator Xpro (Bayer, 25.05.2016); Osiris (06.06.2016)	NA	NA	809	YES	c3_580_1A1
c3_580_1A2	c3	AROBASE	580	1	A	Switzerland	Eschikon field station	04.07.2016	2016	Input (Bayer, 06.04.2016); Aviator Xpro (Bayer, 25.05.2016); Osiris (06.06.2016)	NA	NA	1565	YES	c3_580_1A2
c3_580_2A1	c3	AROBASE	580	2	A	Switzerland	Eschikon field station	04.07.2016	2016	Input (Bayer, 06.04.2016); Aviator Xpro (Bayer, 25.05.2016); Osiris (06.06.2016)	NA	NA	295	YES	c3_580_2A1
c3_580_2B1	c3	AROBASE	580	2	B	Switzerland	Eschikon field station	04.07.2016	2016	Input (Bayer, 06.04.2016); Aviator Xpro (Bayer, 25.05.2016); Osiris (06.06.2016)	NA	NA	885	NA	c3_580_2B1
c3_580_2B2	c3	AROBASE	580	2	B	Switzerland	Eschikon field station	04.07.2016	2016	Input (Bayer, 06.04.2016); Aviator Xpro (Bayer, 25.05.2016); Osiris (06.06.2016)	NA	NA	793	NA	c3_580_2B2
c3_580_2B3	c3	AROBASE	580	2	B	Switzerland	Eschikon field station	04.07.2016	2016	Input (Bayer, 06.04.2016); Aviator Xpro (Bayer, 25.05.2016); Osiris (06.06.2016)	NA	NA	794	YES	c3_580_2B3
c3_580_3A1	c3	AROBASE	580	3	A	Switzerland	Eschikon field station	04.07.2016	2016	Input (Bayer, 06.04.2016); Aviator Xpro (Bayer, 25.05.2016); Osiris (06.06.2016)	NA	NA	1479	NA	c3_580_3A1
c3_580_3A2	c3	AROBASE	580	3	A	Switzerland	Eschikon field station	04.07.2016	2016	Input (Bayer, 06.04.2016); Aviator Xpro (Bayer, 25.05.2016); Osiris (06.06.2016)	NA	NA	793	NA	c3_580_3A2
c3_580_3B1	c3	AROBASE	580	3	B	Switzerland	Eschikon field station	04.07.2016	2016	Input (Bayer, 06.04.2016); Aviator Xpro (Bayer, 25.05.2016); Osiris (06.06.2016)	NA	NA	1026	YES	c3_580_3B1
c3_580_4A1	c3	AROBASE	580	4	A	Switzerland	Eschikon field station	04.07.2016	2016	Input (Bayer, 06.04.2016); Aviator Xpro (Bayer, 25.05.2016); Osiris (06.06.2016)	NA	NA	1512	YES	c3_580_4A1
c3_580_4A2	c3	AROBASE	580	4	A	Switzerland	Eschikon field station	04.07.2016	2016	Input (Bayer, 06.04.2016); Aviator Xpro (Bayer, 25.05.2016); Osiris (06.06.2016)	NA	NA	1513	YES	c3_580_4A2
c3_580_4B1	c3	AROBASE	580	4	B	Switzerland	Eschikon field station	04.07.2016	2016	Input (Bayer, 06.04.2016); Aviator Xpro (Bayer, 25.05.2016); Osiris (06.06.2016)	NA	NA	445	YES	c3_580_4B1
c3_580_4B2	c3	AROBASE	580	4	B	Switzerland	Eschikon field station	04.07.2016	2016	Input (Bayer, 06.04.2016); Aviator Xpro (Bayer, 25.05.2016); Osiris (06.06.2016)	NA	NA	1509	YES	c3_580_4B2
c3_580_5A1	c3	AROBASE	580	5	A	Switzerland	Eschikon field station	04.07.2016	2016	Input (Bayer, 06.04.2016); Aviator Xpro (Bayer, 25.05.2016); Osiris (06.06.2016)	NA	NA	464	NA	c3_580_5A1
c3_580_5A2	c3	AROBASE	580	5	A	Switzerland	Eschikon field station	04.07.2016	2016	Input (Bayer, 06.04.2016); Aviator Xpro (Bayer, 25.05.2016); Osiris (06.06.2016)	NA	NA	1566	NA	c3_580_5A2
c3_580_5A3	c3	AROBASE	580	5	A	Switzerland	Eschikon field station	04.07.2016	2016	Input (Bayer, 06.04.2016); Aviator Xpro (Bayer, 25.05.2016); Osiris (06.06.2016)	NA	NA	463	NA	c3_580_5A3
c3_580_5B1	c3	AROBASE	580	5	B	Switzerland	Eschikon field station	04.07.2016	2016	Input (Bayer, 06.04.2016); Aviator Xpro (Bayer, 25.05.2016); Osiris (06.06.2016)	NA	NA	464	NA	c3_580_5B1
c3_580_5B2	c3	AROBASE	580	5	B	Switzerland	Eschikon field station	04.07.2016	2016	Input (Bayer, 06.04.2016); Aviator Xpro (Bayer, 25.05.2016); Osiris (06.06.2016)	NA	NA	1508	NA	c3_580_5B2
c3_580_6A1	c3	AROBASE	580	6	A	Switzerland	Eschikon field station	04.07.2016	2016	Input (Bayer, 06.04.2016); Aviator Xpro (Bayer, 25.05.2016); Osiris (06.06.2016)	NA	NA	562	NA	c3_580_6A1
c3_580_6A2	c3	AROBASE	580	6	A	Switzerland	Eschikon field station	04.07.2016	2016	Input (Bayer, 06.04.2016); Aviator Xpro (Bayer, 25.05.2016); Osiris (06.06.2016)	NA	NA	1508	NA	c3_580_6A2
c3_580_6B1	c3	AROBASE	580	6	B	Switzerland	Eschikon field station	04.07.2016	2016	Input (Bayer, 06.04.2016); Aviator Xpro (Bayer, 25.05.2016); Osiris (06.06.2016)	NA	NA	562	NA	c3_580_6B1
c3_580_6B2	c3	AROBASE	580	6	B	Switzerland	Eschikon field station	04.07.2016	2016	Input (Bayer, 06.04.2016); Aviator Xpro (Bayer, 25.05.2016); Osiris (06.06.2016)	NA	NA	1195	NA	c3_580_6B2
c3_580_7A1	c3	AROBASE	580	7	A	Switzerland	Eschikon field station	04.07.2016	2016	Input (Bayer, 06.04.2016); Aviator Xpro (Bayer, 25.05.2016); Osiris (06.06.2016)	NA	NA	130	NA	c3_580_7A1
c3_580_7A2	c3	AROBASE	580	7	A	Switzerland	Eschikon field station	04.07.2016	2016	Input (Bayer, 06.04.2016); Aviator Xpro (Bayer, 25.05.2016); Osiris (06.06.2016)	NA	NA	384	NA	c3_580_7A2
c3_580_7B1	c3	AROBASE	580	7	B	Switzerland	Eschikon field station	04.07.2016	2016	Input (Bayer, 06.04.2016); Aviator Xpro (Bayer, 25.05.2016); Osiris (06.06.2016)	NA	NA	130	NA	c3_580_7B1
c3_580_8A1	c3	AROBASE	580	8	A	Switzerland	Eschikon field station	04.07.2016	2016	Input (Bayer, 06.04.2016); Aviator Xpro (Bayer, 25.05.2016); Osiris (06.06.2016)	NA	NA	1042	NA	c3_580_8A1
c3_580_8A2	c3	AROBASE	580	8	A	Switzerland	Eschikon field station	04.07.2016	2016	Input (Bayer, 06.04.2016); Aviator Xpro (Bayer, 25.05.2016); Osiris (06.06.2016)	NA	NA	1368	YES	c3_580_8A2
c3_580_8B1	c3	AROBASE	580	8	B	Switzerland	Eschikon field station	04.07.2016	2016	Input (Bayer, 06.04.2016); Aviator Xpro (Bayer, 25.05.2016); Osiris (06.06.2016)	NA	NA	1453	YES	c3_580_8B1
c3_580_8B2	c3	AROBASE	580	8	B	Switzerland	Eschikon field station	04.07.2016	2016	Input (Bayer, 06.04.2016); Aviator Xpro (Bayer, 25.05.2016); Osiris (06.06.2016)	NA	NA	807	YES	c3_580_8B2
c3_580_9A1	c3	AROBASE	580	9	A	Switzerland	Eschikon field station	04.07.2016	2016	Input (Bayer, 06.04.2016); Aviator Xpro (Bayer, 25.05.2016); Osiris (06.06.2016)	NA	NA	909	YES	c3_580_9A1
c3_580_9A2	c3	AROBASE	580	9	A	Switzerland	Eschikon field station	04.07.2016	2016	Input (Bayer, 06.04.2016); Aviator Xpro (Bayer, 25.05.2016); Osiris (06.06.2016)	NA	NA	623	YES	c3_580_9A2
c3_580_9A3	c3	AROBASE	580	9	A	Switzerland	Eschikon field station	04.07.2016	2016	Input (Bayer, 06.04.2016); Aviator Xpro (Bayer, 25.05.2016); Osiris (06.06.2016)	NA	NA	640	NA	c3_580_9A3
c3_59_10B1	c3	AROBASE	59	10	B	Switzerland	Eschikon field station	04.07.2016	2016	Input (Bayer, 06.04.2016); Aviator Xpro (Bayer, 25.05.2016); Osiris (06.06.2016)	NA	NA	1184	YES	c3_59_10B1
c3_59_10B2	c3	AROBASE	59	10	B	Switzerland	Eschikon field station	04.07.2016	2016	Input (Bayer, 06.04.2016); Aviator Xpro (Bayer, 25.05.2016); Osiris (06.06.2016)	NA	NA	759	YES	c3_59_10B2
c3_59_11A1	c3	AROBASE	59	11	A	Switzerland	Eschikon field station	04.07.2016	2016	Input (Bayer, 06.04.2016); Aviator Xpro (Bayer, 25.05.2016); Osiris (06.06.2016)	NA	NA	761	NA	c3_59_11A1
c3_59_11A2	c3	AROBASE	59	11	A	Switzerland	Eschikon field station	04.07.2016	2016	Input (Bayer, 06.04.2016); Aviator Xpro (Bayer, 25.05.2016); Osiris (06.06.2016)	NA	NA	956	YES	c3_59_11A2
c3_59_11A3	c3	AROBASE	59	11	A	Switzerland	Eschikon field station	04.07.2016	2016	Input (Bayer, 06.04.2016); Aviator Xpro (Bayer, 25.05.2016); Osiris (06.06.2016)	NA	NA	981	YES	c3_59_11A3
c3_59_11B1	c3	AROBASE	59	11	B	Switzerland	Eschikon field station	04.07.2016	2016	Input (Bayer, 06.04.2016); Aviator Xpro (Bayer, 25.05.2016); Osiris (06.06.2016)	NA	NA	725	YES	c3_59_11B1
c3_59_13B2	c3	AROBASE	59	13	B	Switzerland	Eschikon field station	04.07.2016	2016	Input (Bayer, 06.04.2016); Aviator Xpro (Bayer, 25.05.2016); Osiris (06.06.2016)	NA	NA	348	NA	c3_59_13B2
c3_59_14A1	c3	AROBASE	59	14	A	Switzerland	Eschikon field station	04.07.2016	2016	Input (Bayer, 06.04.2016); Aviator Xpro (Bayer, 25.05.2016); Osiris (06.06.2016)	NA	NA	678	YES	c3_59_14A1
c3_59_15A1	c3	AROBASE	59	15	A	Switzerland	Eschikon field station	04.07.2016	2016	Input (Bayer, 06.04.2016); Aviator Xpro (Bayer, 25.05.2016); Osiris (06.06.2016)	NA	NA	353	NA	c3_59_15A1
c3_59_15B1	c3	AROBASE	59	15	B	Switzerland	Eschikon field station	04.07.2016	2016	Input (Bayer, 06.04.2016); Aviator Xpro (Bayer, 25.05.2016); Osiris (06.06.2016)	NA	NA	517	NA	c3_59_15B1
c3_59_16A1	c3	AROBASE	59	16	A	Switzerland	Eschikon field station	04.07.2016	2016	Input (Bayer, 06.04.2016); Aviator Xpro (Bayer, 25.05.2016); Osiris (06.06.2016)	NA	NA	758	YES	c3_59_16A1
c3_59_1A1	c3	AROBASE	59	1	A	Switzerland	Eschikon field station	04.07.2016	2016	Input (Bayer, 06.04.2016); Aviator Xpro (Bayer, 25.05.2016); Osiris (06.06.2016)	NA	NA	349	NA	c3_59_1A1
c3_59_2A1	c3	AROBASE	59	2	A	Switzerland	Eschikon field station	04.07.2016	2016	Input (Bayer, 06.04.2016); Aviator Xpro (Bayer, 25.05.2016); Osiris (06.06.2016)	NA	NA	297	NA	c3_59_2A1
c3_59_2A2	c3	AROBASE	59	2	A	Switzerland	Eschikon field station	04.07.2016	2016	Input (Bayer, 06.04.2016); Aviator Xpro (Bayer, 25.05.2016); Osiris (06.06.2016)	NA	NA	297	NA	c3_59_2A2
c3_59_2A3	c3	AROBASE	59	2	A	Switzerland	Eschikon field station	04.07.2016	2016	Input (Bayer, 06.04.2016); Aviator Xpro (Bayer, 25.05.2016); Osiris (06.06.2016)	NA	NA	27	NA	c3_59_2A3
c3_59_3A1	c3	AROBASE	59	3	A	Switzerland	Eschikon field station	04.07.2016	2016	Input (Bayer, 06.04.2016); Aviator Xpro (Bayer, 25.05.2016); Osiris (06.06.2016)	NA	NA	747	NA	c3_59_3A1
c3_59_3A2	c3	AROBASE	59	3	A	Switzerland	Eschikon field station	04.07.2016	2016	Input (Bayer, 06.04.2016); Aviator Xpro (Bayer, 25.05.2016); Osiris (06.06.2016)	NA	NA	724	YES	c3_59_3A2
c3_59_3B1	c3	AROBASE	59	3	B	Switzerland	Eschikon field station	04.07.2016	2016	Input (Bayer, 06.04.2016); Aviator Xpro (Bayer, 25.05.2016); Osiris (06.06.2016)	NA	NA	939	NA	c3_59_3B1
c3_59_3B2	c3	AROBASE	59	3	B	Switzerland	Eschikon field station	04.07.2016	2016	Input (Bayer, 06.04.2016); Aviator Xpro (Bayer, 25.05.2016); Osiris (06.06.2016)	NA	NA	1129	YES	c3_59_3B2
c3_59_4B1	c3	AROBASE	59	4	B	Switzerland	Eschikon field station	04.07.2016	2016	Input (Bayer, 06.04.2016); Aviator Xpro (Bayer, 25.05.2016); Osiris (06.06.2016)	NA	NA	939	NA	c3_59_4B1
c3_59_4B2	c3	AROBASE	59	4	B	Switzerland	Eschikon field station	04.07.2016	2016	Input (Bayer, 06.04.2016); Aviator Xpro (Bayer, 25.05.2016); Osiris (06.06.2016)	NA	NA	939	NA	c3_59_4B2
c3_59_4B3	c3	AROBASE	59	4	B	Switzerland	Eschikon field station	04.07.2016	2016	Input (Bayer, 06.04.2016); Aviator Xpro (Bayer, 25.05.2016); Osiris (06.06.2016)	NA	NA	554	NA	c3_59_4B3
c3_59_5B1	c3	AROBASE	59	5	B	Switzerland	Eschikon field station	04.07.2016	2016	Input (Bayer, 06.04.2016); Aviator Xpro (Bayer, 25.05.2016); Osiris (06.06.2016)	NA	NA	629	YES	c3_59_5B1
c3_59_6A1	c3	AROBASE	59	6	A	Switzerland	Eschikon field station	04.07.2016	2016	Input (Bayer, 06.04.2016); Aviator Xpro (Bayer, 25.05.2016); Osiris (06.06.2016)	NA	NA	723	YES	c3_59_6A1
c3_59_6B1	c3	AROBASE	59	6	B	Switzerland	Eschikon field station	04.07.2016	2016	Input (Bayer, 06.04.2016); Aviator Xpro (Bayer, 25.05.2016); Osiris (06.06.2016)	NA	NA	33	YES	c3_59_6B1
c3_59_7A1	c3	AROBASE	59	7	A	Switzerland	Eschikon field station	04.07.2016	2016	Input (Bayer, 06.04.2016); Aviator Xpro (Bayer, 25.05.2016); Osiris (06.06.2016)	NA	NA	652	YES	c3_59_7A1
c3_59_7B1	c3	AROBASE	59	7	B	Switzerland	Eschikon field station	04.07.2016	2016	Input (Bayer, 06.04.2016); Aviator Xpro (Bayer, 25.05.2016); Osiris (06.06.2016)	NA	NA	776	NA	c3_59_7B1
c3_59_7B2	c3	AROBASE	59	7	B	Switzerland	Eschikon field station	04.07.2016	2016	Input (Bayer, 06.04.2016); Aviator Xpro (Bayer, 25.05.2016); Osiris (06.06.2016)	NA	NA	897	NA	c3_59_7B2
c3_59_8A1	c3	AROBASE	59	8	A	Switzerland	Eschikon field station	04.07.2016	2016	Input (Bayer, 06.04.2016); Aviator Xpro (Bayer, 25.05.2016); Osiris (06.06.2016)	NA	NA	1165	YES	c3_59_8A1
c3_59_8A2	c3	AROBASE	59	8	A	Switzerland	Eschikon field station	04.07.2016	2016	Input (Bayer, 06.04.2016); Aviator Xpro (Bayer, 25.05.2016); Osiris (06.06.2016)	NA	NA	569	YES	c3_59_8A2
c3_59_8B1	c3	AROBASE	59	8	B	Switzerland	Eschikon field station	04.07.2016	2016	Input (Bayer, 06.04.2016); Aviator Xpro (Bayer, 25.05.2016); Osiris (06.06.2016)	NA	NA	761	NA	c3_59_8B1
c3_59_8B2	c3	AROBASE	59	8	B	Switzerland	Eschikon field station	04.07.2016	2016	Input (Bayer, 06.04.2016); Aviator Xpro (Bayer, 25.05.2016); Osiris (06.06.2016)	NA	NA	515	NA	c3_59_8B2
c3_59_9A1	c3	AROBASE	59	9	A	Switzerland	Eschikon field station	04.07.2016	2016	Input (Bayer, 06.04.2016); Aviator Xpro (Bayer, 25.05.2016); Osiris (06.06.2016)	NA	NA	528	YES	c3_59_9A1
c3_59_9A2	c3	AROBASE	59	9	A	Switzerland	Eschikon field station	04.07.2016	2016	Input (Bayer, 06.04.2016); Aviator Xpro (Bayer, 25.05.2016); Osiris (06.06.2016)	NA	NA	1206	YES	c3_59_9A2
c3_59_9B1	c3	AROBASE	59	9	B	Switzerland	Eschikon field station	04.07.2016	2016	Input (Bayer, 06.04.2016); Aviator Xpro (Bayer, 25.05.2016); Osiris (06.06.2016)	NA	NA	351	NA	c3_59_9B1
c3_59_9B2	c3	AROBASE	59	9	B	Switzerland	Eschikon field station	04.07.2016	2016	Input (Bayer, 06.04.2016); Aviator Xpro (Bayer, 25.05.2016); Osiris (06.06.2016)	NA	NA	761	NA	c3_59_9B2
c3_611_10A1	c3	LORENZO	611	10	A	Switzerland	Eschikon field station	04.07.2016	2016	Input (Bayer, 06.04.2016); Aviator Xpro (Bayer, 25.05.2016); Osiris (06.06.2016)	NA	NA	1124	NA	c3_611_10A1
c3_611_10A2	c3	LORENZO	611	10	A	Switzerland	Eschikon field station	04.07.2016	2016	Input (Bayer, 06.04.2016); Aviator Xpro (Bayer, 25.05.2016); Osiris (06.06.2016)	NA	NA	1355	YES	c3_611_10A2
c3_611_10B2	c3	LORENZO	611	10	B	Switzerland	Eschikon field station	04.07.2016	2016	Input (Bayer, 06.04.2016); Aviator Xpro (Bayer, 25.05.2016); Osiris (06.06.2016)	NA	NA	207	YES	c3_611_10B2
c3_611_11A2	c3	LORENZO	611	11	A	Switzerland	Eschikon field station	04.07.2016	2016	Input (Bayer, 06.04.2016); Aviator Xpro (Bayer, 25.05.2016); Osiris (06.06.2016)	ST16CH_3T31	SRR10728677	1266	YES	c3_611_11A2
c3_611_11A3	c3	LORENZO	611	11	A	Switzerland	Eschikon field station	04.07.2016	2016	Input (Bayer, 06.04.2016); Aviator Xpro (Bayer, 25.05.2016); Osiris (06.06.2016)	NA	NA	26	YES	c3_611_11A3
c3_611_11B1	c3	LORENZO	611	11	B	Switzerland	Eschikon field station	04.07.2016	2016	Input (Bayer, 06.04.2016); Aviator Xpro (Bayer, 25.05.2016); Osiris (06.06.2016)	NA	NA	409	NA	c3_611_11B1
c3_611_11B2	c3	LORENZO	611	11	B	Switzerland	Eschikon field station	04.07.2016	2016	Input (Bayer, 06.04.2016); Aviator Xpro (Bayer, 25.05.2016); Osiris (06.06.2016)	NA	NA	702	NA	c3_611_11B2
c3_611_12A1	c3	LORENZO	611	12	A	Switzerland	Eschikon field station	04.07.2016	2016	Input (Bayer, 06.04.2016); Aviator Xpro (Bayer, 25.05.2016); Osiris (06.06.2016)	NA	NA	1389	YES	c3_611_12A1
c3_611_13B1	c3	LORENZO	611	13	B	Switzerland	Eschikon field station	04.07.2016	2016	Input (Bayer, 06.04.2016); Aviator Xpro (Bayer, 25.05.2016); Osiris (06.06.2016)	NA	NA	424	YES	c3_611_13B1
c3_611_14A2	c3	LORENZO	611	14	A	Switzerland	Eschikon field station	04.07.2016	2016	Input (Bayer, 06.04.2016); Aviator Xpro (Bayer, 25.05.2016); Osiris (06.06.2016)	NA	NA	335	YES	c3_611_14A2
c3_611_14A3	c3	LORENZO	611	14	A	Switzerland	Eschikon field station	04.07.2016	2016	Input (Bayer, 06.04.2016); Aviator Xpro (Bayer, 25.05.2016); Osiris (06.06.2016)	NA	NA	331	YES	c3_611_14A3
c3_611_14B1	c3	LORENZO	611	14	B	Switzerland	Eschikon field station	04.07.2016	2016	Input (Bayer, 06.04.2016); Aviator Xpro (Bayer, 25.05.2016); Osiris (06.06.2016)	ST16CH_3T39	SRR10728676	324	NA	c3_611_14B1
c3_611_14B2	c3	LORENZO	611	14	B	Switzerland	Eschikon field station	04.07.2016	2016	Input (Bayer, 06.04.2016); Aviator Xpro (Bayer, 25.05.2016); Osiris (06.06.2016)	NA	NA	330	NA	c3_611_14B2
c3_611_14B3	c3	LORENZO	611	14	B	Switzerland	Eschikon field station	04.07.2016	2016	Input (Bayer, 06.04.2016); Aviator Xpro (Bayer, 25.05.2016); Osiris (06.06.2016)	NA	NA	1482	NA	c3_611_14B3
c3_611_15A3	c3	LORENZO	611	15	A	Switzerland	Eschikon field station	04.07.2016	2016	Input (Bayer, 06.04.2016); Aviator Xpro (Bayer, 25.05.2016); Osiris (06.06.2016)	NA	NA	735	YES	c3_611_15A3
c3_611_15B1	c3	LORENZO	611	15	B	Switzerland	Eschikon field station	04.07.2016	2016	Input (Bayer, 06.04.2016); Aviator Xpro (Bayer, 25.05.2016); Osiris (06.06.2016)	NA	NA	1519	YES	c3_611_15B1
c3_611_15B2	c3	LORENZO	611	15	B	Switzerland	Eschikon field station	04.07.2016	2016	Input (Bayer, 06.04.2016); Aviator Xpro (Bayer, 25.05.2016); Osiris (06.06.2016)	NA	NA	1484	NA	c3_611_15B2
c3_611_15B3	c3	LORENZO	611	15	B	Switzerland	Eschikon field station	04.07.2016	2016	Input (Bayer, 06.04.2016); Aviator Xpro (Bayer, 25.05.2016); Osiris (06.06.2016)	NA	NA	1485	YES	c3_611_15B3
c3_611_16A1	c3	LORENZO	611	16	A	Switzerland	Eschikon field station	04.07.2016	2016	Input (Bayer, 06.04.2016); Aviator Xpro (Bayer, 25.05.2016); Osiris (06.06.2016)	NA	NA	294	YES	c3_611_16A1
c3_611_16A2	c3	LORENZO	611	16	A	Switzerland	Eschikon field station	04.07.2016	2016	Input (Bayer, 06.04.2016); Aviator Xpro (Bayer, 25.05.2016); Osiris (06.06.2016)	NA	NA	24	NA	c3_611_16A2
c3_611_16A3	c3	LORENZO	611	16	A	Switzerland	Eschikon field station	04.07.2016	2016	Input (Bayer, 06.04.2016); Aviator Xpro (Bayer, 25.05.2016); Osiris (06.06.2016)	NA	NA	1285	YES	c3_611_16A3
c3_611_16B1	c3	LORENZO	611	16	B	Switzerland	Eschikon field station	04.07.2016	2016	Input (Bayer, 06.04.2016); Aviator Xpro (Bayer, 25.05.2016); Osiris (06.06.2016)	NA	NA	184	YES	c3_611_16B1
c3_611_16B2	c3	LORENZO	611	16	B	Switzerland	Eschikon field station	04.07.2016	2016	Input (Bayer, 06.04.2016); Aviator Xpro (Bayer, 25.05.2016); Osiris (06.06.2016)	NA	NA	87	NA	c3_611_16B2
c3_611_1A3	c3	LORENZO	611	1	A	Switzerland	Eschikon field station	04.07.2016	2016	Input (Bayer, 06.04.2016); Aviator Xpro (Bayer, 25.05.2016); Osiris (06.06.2016)	NA	NA	965	YES	c3_611_1A3
c3_611_3A1	c3	LORENZO	611	3	A	Switzerland	Eschikon field station	04.07.2016	2016	Input (Bayer, 06.04.2016); Aviator Xpro (Bayer, 25.05.2016); Osiris (06.06.2016)	ST16CH_3T5	SRR10728675	571	YES	c3_611_3A1
c3_611_3A3	c3	LORENZO	611	3	A	Switzerland	Eschikon field station	04.07.2016	2016	Input (Bayer, 06.04.2016); Aviator Xpro (Bayer, 25.05.2016); Osiris (06.06.2016)	NA	NA	915	YES	c3_611_3A3
c3_611_4B1	c3	LORENZO	611	4	B	Switzerland	Eschikon field station	04.07.2016	2016	Input (Bayer, 06.04.2016); Aviator Xpro (Bayer, 25.05.2016); Osiris (06.06.2016)	NA	NA	70	YES	c3_611_4B1
c3_611_4B2	c3	LORENZO	611	4	B	Switzerland	Eschikon field station	04.07.2016	2016	Input (Bayer, 06.04.2016); Aviator Xpro (Bayer, 25.05.2016); Osiris (06.06.2016)	NA	NA	280	YES	c3_611_4B2
c3_611_4B3	c3	LORENZO	611	4	B	Switzerland	Eschikon field station	04.07.2016	2016	Input (Bayer, 06.04.2016); Aviator Xpro (Bayer, 25.05.2016); Osiris (06.06.2016)	NA	NA	2	NA	c3_611_4B3
c3_611_5A1	c3	LORENZO	611	5	A	Switzerland	Eschikon field station	04.07.2016	2016	Input (Bayer, 06.04.2016); Aviator Xpro (Bayer, 25.05.2016); Osiris (06.06.2016)	NA	NA	997	YES	c3_611_5A1
c3_611_5A2	c3	LORENZO	611	5	A	Switzerland	Eschikon field station	04.07.2016	2016	Input (Bayer, 06.04.2016); Aviator Xpro (Bayer, 25.05.2016); Osiris (06.06.2016)	NA	NA	602	NA	c3_611_5A2
c3_611_5A3	c3	LORENZO	611	5	A	Switzerland	Eschikon field station	04.07.2016	2016	Input (Bayer, 06.04.2016); Aviator Xpro (Bayer, 25.05.2016); Osiris (06.06.2016)	NA	NA	30	NA	c3_611_5A3
c3_611_5B2	c3	LORENZO	611	5	B	Switzerland	Eschikon field station	04.07.2016	2016	Input (Bayer, 06.04.2016); Aviator Xpro (Bayer, 25.05.2016); Osiris (06.06.2016)	NA	NA	322	NA	c3_611_5B2
c3_611_6A2	c3	LORENZO	611	6	A	Switzerland	Eschikon field station	04.07.2016	2016	Input (Bayer, 06.04.2016); Aviator Xpro (Bayer, 25.05.2016); Osiris (06.06.2016)	NA	NA	1477	YES	c3_611_6A2
c3_611_6A3	c3	LORENZO	611	6	A	Switzerland	Eschikon field station	04.07.2016	2016	Input (Bayer, 06.04.2016); Aviator Xpro (Bayer, 25.05.2016); Osiris (06.06.2016)	NA	NA	811	NA	c3_611_6A3
c3_611_6B3	c3	LORENZO	611	6	B	Switzerland	Eschikon field station	04.07.2016	2016	Input (Bayer, 06.04.2016); Aviator Xpro (Bayer, 25.05.2016); Osiris (06.06.2016)	NA	NA	808	NA	c3_611_6B3
c3_611_7A1	c3	LORENZO	611	7	A	Switzerland	Eschikon field station	04.07.2016	2016	Input (Bayer, 06.04.2016); Aviator Xpro (Bayer, 25.05.2016); Osiris (06.06.2016)	NA	NA	787	NA	c3_611_7A1
c3_611_7A2	c3	LORENZO	611	7	A	Switzerland	Eschikon field station	04.07.2016	2016	Input (Bayer, 06.04.2016); Aviator Xpro (Bayer, 25.05.2016); Osiris (06.06.2016)	NA	NA	787	NA	c3_611_7A2
c3_611_7A3	c3	LORENZO	611	7	A	Switzerland	Eschikon field station	04.07.2016	2016	Input (Bayer, 06.04.2016); Aviator Xpro (Bayer, 25.05.2016); Osiris (06.06.2016)	NA	NA	797	YES	c3_611_7A3
c3_611_7B1	c3	LORENZO	611	7	B	Switzerland	Eschikon field station	04.07.2016	2016	Input (Bayer, 06.04.2016); Aviator Xpro (Bayer, 25.05.2016); Osiris (06.06.2016)	NA	NA	782	NA	c3_611_7B1
c3_611_7B3	c3	LORENZO	611	7	B	Switzerland	Eschikon field station	04.07.2016	2016	Input (Bayer, 06.04.2016); Aviator Xpro (Bayer, 25.05.2016); Osiris (06.06.2016)	NA	NA	784	YES	c3_611_7B3
c3_611_8A3	c3	LORENZO	611	8	A	Switzerland	Eschikon field station	04.07.2016	2016	Input (Bayer, 06.04.2016); Aviator Xpro (Bayer, 25.05.2016); Osiris (06.06.2016)	NA	NA	458	NA	c3_611_8A3
c3_611_8B2	c3	LORENZO	611	8	B	Switzerland	Eschikon field station	04.07.2016	2016	Input (Bayer, 06.04.2016); Aviator Xpro (Bayer, 25.05.2016); Osiris (06.06.2016)	NA	NA	780	YES	c3_611_8B2
c3_611_9A3	c3	LORENZO	611	9	A	Switzerland	Eschikon field station	04.07.2016	2016	Input (Bayer, 06.04.2016); Aviator Xpro (Bayer, 25.05.2016); Osiris (06.06.2016)	NA	NA	737	YES	c3_611_9A3
c3_611_9B1	c3	LORENZO	611	9	B	Switzerland	Eschikon field station	04.07.2016	2016	Input (Bayer, 06.04.2016); Aviator Xpro (Bayer, 25.05.2016); Osiris (06.06.2016)	NA	NA	1335	NA	c3_611_9B1
c3_611_9B3	c3	LORENZO	611	9	B	Switzerland	Eschikon field station	04.07.2016	2016	Input (Bayer, 06.04.2016); Aviator Xpro (Bayer, 25.05.2016); Osiris (06.06.2016)	NA	NA	821	NA	c3_611_9B3
c3_631_1H1	c3	HALDOR	631	1	H	Switzerland	Eschikon field station	04.07.2016	2016	Input (Bayer, 06.04.2016); Aviator Xpro (Bayer, 25.05.2016); Osiris (06.06.2016)	NA	NA	259	NA	c3_631_1H1
c3_631_1J1	c3	HALDOR	631	1	J	Switzerland	Eschikon field station	04.07.2016	2016	Input (Bayer, 06.04.2016); Aviator Xpro (Bayer, 25.05.2016); Osiris (06.06.2016)	NA	NA	1076	NA	c3_631_1J1
c3_631_1J2	c3	HALDOR	631	1	J	Switzerland	Eschikon field station	04.07.2016	2016	Input (Bayer, 06.04.2016); Aviator Xpro (Bayer, 25.05.2016); Osiris (06.06.2016)	NA	NA	1076	NA	c3_631_1J2
c3_631_1J3	c3	HALDOR	631	1	J	Switzerland	Eschikon field station	04.07.2016	2016	Input (Bayer, 06.04.2016); Aviator Xpro (Bayer, 25.05.2016); Osiris (06.06.2016)	NA	NA	1076	NA	c3_631_1J3
c3_631_2J1	c3	HALDOR	631	2	J	Switzerland	Eschikon field station	04.07.2016	2016	Input (Bayer, 06.04.2016); Aviator Xpro (Bayer, 25.05.2016); Osiris (06.06.2016)	NA	NA	149	NA	c3_631_2J1
c3_631_8H1	c3	HALDOR	631	8	H	Switzerland	Eschikon field station	04.07.2016	2016	Input (Bayer, 06.04.2016); Aviator Xpro (Bayer, 25.05.2016); Osiris (06.06.2016)	NA	NA	928	NA	c3_631_8H1
c3_631_9L1	c3	HALDOR	631	9	L	Switzerland	Eschikon field station	04.07.2016	2016	Input (Bayer, 06.04.2016); Aviator Xpro (Bayer, 25.05.2016); Osiris (06.06.2016)	NA	NA	867	NA	c3_631_9L1
c3_64_11Z1	c3	AROBASE	64	11	Z	Switzerland	Eschikon field station	04.07.2016	2016	Input (Bayer, 06.04.2016); Aviator Xpro (Bayer, 25.05.2016); Osiris (06.06.2016)	NA	NA	854	YES	c3_64_11Z1
c3_64_16V1	c3	AROBASE	64	16	V	Switzerland	Eschikon field station	04.07.2016	2016	Input (Bayer, 06.04.2016); Aviator Xpro (Bayer, 25.05.2016); Osiris (06.06.2016)	NA	NA	1465	YES	c3_64_16V1
c3_640_11A2	c3	CH CLARO	640	11	A	Switzerland	Eschikon field station	04.07.2016	2016	Input (Bayer, 06.04.2016); Aviator Xpro (Bayer, 25.05.2016); Osiris (06.06.2016)	ST16CH_3U42	SRR10728674	742	YES	c3_640_11A2
c3_640_11B1	c3	CH CLARO	640	11	B	Switzerland	Eschikon field station	04.07.2016	2016	Input (Bayer, 06.04.2016); Aviator Xpro (Bayer, 25.05.2016); Osiris (06.06.2016)	NA	NA	994	NA	c3_640_11B1
c3_640_11B2	c3	CH CLARO	640	11	B	Switzerland	Eschikon field station	04.07.2016	2016	Input (Bayer, 06.04.2016); Aviator Xpro (Bayer, 25.05.2016); Osiris (06.06.2016)	NA	NA	1274	NA	c3_640_11B2
c3_640_11B3	c3	CH CLARO	640	11	B	Switzerland	Eschikon field station	04.07.2016	2016	Input (Bayer, 06.04.2016); Aviator Xpro (Bayer, 25.05.2016); Osiris (06.06.2016)	NA	NA	891	NA	c3_640_11B3
c3_640_12A1	c3	CH CLARO	640	12	A	Switzerland	Eschikon field station	04.07.2016	2016	Input (Bayer, 06.04.2016); Aviator Xpro (Bayer, 25.05.2016); Osiris (06.06.2016)	NA	NA	175	NA	c3_640_12A1
c3_640_12A3	c3	CH CLARO	640	12	A	Switzerland	Eschikon field station	04.07.2016	2016	Input (Bayer, 06.04.2016); Aviator Xpro (Bayer, 25.05.2016); Osiris (06.06.2016)	NA	NA	968	NA	c3_640_12A3
c3_640_12B1	c3	CH CLARO	640	12	B	Switzerland	Eschikon field station	04.07.2016	2016	Input (Bayer, 06.04.2016); Aviator Xpro (Bayer, 25.05.2016); Osiris (06.06.2016)	NA	NA	338	YES	c3_640_12B1
c3_640_12B2	c3	CH CLARO	640	12	B	Switzerland	Eschikon field station	04.07.2016	2016	Input (Bayer, 06.04.2016); Aviator Xpro (Bayer, 25.05.2016); Osiris (06.06.2016)	NA	NA	175	NA	c3_640_12B2
c3_640_12B3	c3	CH CLARO	640	12	B	Switzerland	Eschikon field station	04.07.2016	2016	Input (Bayer, 06.04.2016); Aviator Xpro (Bayer, 25.05.2016); Osiris (06.06.2016)	NA	NA	1455	NA	c3_640_12B3
c3_640_13A1	c3	CH CLARO	640	13	A	Switzerland	Eschikon field station	04.07.2016	2016	Input (Bayer, 06.04.2016); Aviator Xpro (Bayer, 25.05.2016); Osiris (06.06.2016)	NA	NA	1473	NA	c3_640_13A1
c3_640_13A2	c3	CH CLARO	640	13	A	Switzerland	Eschikon field station	04.07.2016	2016	Input (Bayer, 06.04.2016); Aviator Xpro (Bayer, 25.05.2016); Osiris (06.06.2016)	NA	NA	147	NA	c3_640_13A2
c3_640_13A3	c3	CH CLARO	640	13	A	Switzerland	Eschikon field station	04.07.2016	2016	Input (Bayer, 06.04.2016); Aviator Xpro (Bayer, 25.05.2016); Osiris (06.06.2016)	NA	NA	147	NA	c3_640_13A3
c3_640_13B1	c3	CH CLARO	640	13	B	Switzerland	Eschikon field station	04.07.2016	2016	Input (Bayer, 06.04.2016); Aviator Xpro (Bayer, 25.05.2016); Osiris (06.06.2016)	ST16CH_3U55	SRR10728673	410	YES	c3_640_13B1
c3_640_14A1	c3	CH CLARO	640	14	A	Switzerland	Eschikon field station	04.07.2016	2016	Input (Bayer, 06.04.2016); Aviator Xpro (Bayer, 25.05.2016); Osiris (06.06.2016)	NA	NA	147	NA	c3_640_14A1
c3_640_14A3	c3	CH CLARO	640	14	A	Switzerland	Eschikon field station	04.07.2016	2016	Input (Bayer, 06.04.2016); Aviator Xpro (Bayer, 25.05.2016); Osiris (06.06.2016)	NA	NA	994	NA	c3_640_14A3
c3_640_14B1	c3	CH CLARO	640	14	B	Switzerland	Eschikon field station	04.07.2016	2016	Input (Bayer, 06.04.2016); Aviator Xpro (Bayer, 25.05.2016); Osiris (06.06.2016)	NA	NA	938	YES	c3_640_14B1
c3_640_15A1	c3	CH CLARO	640	15	A	Switzerland	Eschikon field station	04.07.2016	2016	Input (Bayer, 06.04.2016); Aviator Xpro (Bayer, 25.05.2016); Osiris (06.06.2016)	NA	NA	768	YES	c3_640_15A1
c3_640_15B1	c3	CH CLARO	640	15	B	Switzerland	Eschikon field station	04.07.2016	2016	Input (Bayer, 06.04.2016); Aviator Xpro (Bayer, 25.05.2016); Osiris (06.06.2016)	NA	NA	147	NA	c3_640_15B1
c3_640_1B1	c3	CH CLARO	640	1	B	Switzerland	Eschikon field station	04.07.2016	2016	Input (Bayer, 06.04.2016); Aviator Xpro (Bayer, 25.05.2016); Osiris (06.06.2016)	NA	NA	1225	YES	c3_640_1B1
c3_640_2A1	c3	CH CLARO	640	2	A	Switzerland	Eschikon field station	04.07.2016	2016	Input (Bayer, 06.04.2016); Aviator Xpro (Bayer, 25.05.2016); Osiris (06.06.2016)	NA	NA	1259	YES	c3_640_2A1
c3_640_2B2	c3	CH CLARO	640	2	B	Switzerland	Eschikon field station	04.07.2016	2016	Input (Bayer, 06.04.2016); Aviator Xpro (Bayer, 25.05.2016); Osiris (06.06.2016)	NA	NA	1462	NA	c3_640_2B2
c3_640_3B2	c3	CH CLARO	640	3	B	Switzerland	Eschikon field station	04.07.2016	2016	Input (Bayer, 06.04.2016); Aviator Xpro (Bayer, 25.05.2016); Osiris (06.06.2016)	NA	NA	904	YES	c3_640_3B2
c3_640_3B3	c3	CH CLARO	640	3	B	Switzerland	Eschikon field station	04.07.2016	2016	Input (Bayer, 06.04.2016); Aviator Xpro (Bayer, 25.05.2016); Osiris (06.06.2016)	NA	NA	1443	NA	c3_640_3B3
c3_640_4A1	c3	CH CLARO	640	4	A	Switzerland	Eschikon field station	04.07.2016	2016	Input (Bayer, 06.04.2016); Aviator Xpro (Bayer, 25.05.2016); Osiris (06.06.2016)	NA	NA	1205	YES	c3_640_4A1
c3_640_4A2	c3	CH CLARO	640	4	A	Switzerland	Eschikon field station	04.07.2016	2016	Input (Bayer, 06.04.2016); Aviator Xpro (Bayer, 25.05.2016); Osiris (06.06.2016)	NA	NA	1525	NA	c3_640_4A2
c3_640_4A3	c3	CH CLARO	640	4	A	Switzerland	Eschikon field station	04.07.2016	2016	Input (Bayer, 06.04.2016); Aviator Xpro (Bayer, 25.05.2016); Osiris (06.06.2016)	NA	NA	1525	NA	c3_640_4A3
c3_640_5A1	c3	CH CLARO	640	5	A	Switzerland	Eschikon field station	04.07.2016	2016	Input (Bayer, 06.04.2016); Aviator Xpro (Bayer, 25.05.2016); Osiris (06.06.2016)	NA	NA	37	YES	c3_640_5A1
c3_640_5A3	c3	CH CLARO	640	5	A	Switzerland	Eschikon field station	04.07.2016	2016	Input (Bayer, 06.04.2016); Aviator Xpro (Bayer, 25.05.2016); Osiris (06.06.2016)	NA	NA	988	NA	c3_640_5A3
c3_640_5B1	c3	CH CLARO	640	5	B	Switzerland	Eschikon field station	04.07.2016	2016	Input (Bayer, 06.04.2016); Aviator Xpro (Bayer, 25.05.2016); Osiris (06.06.2016)	NA	NA	34	YES	c3_640_5B1
c3_640_5B2	c3	CH CLARO	640	5	B	Switzerland	Eschikon field station	04.07.2016	2016	Input (Bayer, 06.04.2016); Aviator Xpro (Bayer, 25.05.2016); Osiris (06.06.2016)	NA	NA	36	NA	c3_640_5B2
c3_640_5B3	c3	CH CLARO	640	5	B	Switzerland	Eschikon field station	04.07.2016	2016	Input (Bayer, 06.04.2016); Aviator Xpro (Bayer, 25.05.2016); Osiris (06.06.2016)	NA	NA	35	NA	c3_640_5B3
c3_640_5B4	c3	CH CLARO	640	5	B	Switzerland	Eschikon field station	04.07.2016	2016	Input (Bayer, 06.04.2016); Aviator Xpro (Bayer, 25.05.2016); Osiris (06.06.2016)	NA	NA	36	NA	c3_640_5B4
c3_640_6A2	c3	CH CLARO	640	6	A	Switzerland	Eschikon field station	04.07.2016	2016	Input (Bayer, 06.04.2016); Aviator Xpro (Bayer, 25.05.2016); Osiris (06.06.2016)	NA	NA	1515	NA	c3_640_6A2
c3_640_6B2	c3	CH CLARO	640	6	B	Switzerland	Eschikon field station	04.07.2016	2016	Input (Bayer, 06.04.2016); Aviator Xpro (Bayer, 25.05.2016); Osiris (06.06.2016)	NA	NA	1511	YES	c3_640_6B2
c3_640_7A2	c3	CH CLARO	640	7	A	Switzerland	Eschikon field station	04.07.2016	2016	Input (Bayer, 06.04.2016); Aviator Xpro (Bayer, 25.05.2016); Osiris (06.06.2016)	NA	NA	146	NA	c3_640_7A2
c3_640_7A3	c3	CH CLARO	640	7	A	Switzerland	Eschikon field station	04.07.2016	2016	Input (Bayer, 06.04.2016); Aviator Xpro (Bayer, 25.05.2016); Osiris (06.06.2016)	NA	NA	996	NA	c3_640_7A3
c3_640_8A3	c3	CH CLARO	640	8	A	Switzerland	Eschikon field station	04.07.2016	2016	Input (Bayer, 06.04.2016); Aviator Xpro (Bayer, 25.05.2016); Osiris (06.06.2016)	NA	NA	1271	NA	c3_640_8A3
c3_640_8B3	c3	CH CLARO	640	8	B	Switzerland	Eschikon field station	04.07.2016	2016	Input (Bayer, 06.04.2016); Aviator Xpro (Bayer, 25.05.2016); Osiris (06.06.2016)	NA	NA	1409	NA	c3_640_8B3
c3_640_9A3	c3	CH CLARO	640	9	A	Switzerland	Eschikon field station	04.07.2016	2016	Input (Bayer, 06.04.2016); Aviator Xpro (Bayer, 25.05.2016); Osiris (06.06.2016)	NA	NA	871	YES	c3_640_9A3
c3_640_9B1	c3	CH CLARO	640	9	B	Switzerland	Eschikon field station	04.07.2016	2016	Input (Bayer, 06.04.2016); Aviator Xpro (Bayer, 25.05.2016); Osiris (06.06.2016)	NA	NA	987	NA	c3_640_9B1
c3_645_11K1	c3	MARCHEVAL	645	11	K	Switzerland	Eschikon field station	04.07.2016	2016	Input (Bayer, 06.04.2016); Aviator Xpro (Bayer, 25.05.2016); Osiris (06.06.2016)	NA	NA	219	NA	c3_645_11K1
c3_645_16H1	c3	MARCHEVAL	645	16	H	Switzerland	Eschikon field station	04.07.2016	2016	Input (Bayer, 06.04.2016); Aviator Xpro (Bayer, 25.05.2016); Osiris (06.06.2016)	NA	NA	1241	NA	c3_645_16H1
c3_645_16J1	c3	MARCHEVAL	645	16	J	Switzerland	Eschikon field station	04.07.2016	2016	Input (Bayer, 06.04.2016); Aviator Xpro (Bayer, 25.05.2016); Osiris (06.06.2016)	NA	NA	936	NA	c3_645_16J1
c3_645_1J1	c3	MARCHEVAL	645	1	J	Switzerland	Eschikon field station	04.07.2016	2016	Input (Bayer, 06.04.2016); Aviator Xpro (Bayer, 25.05.2016); Osiris (06.06.2016)	NA	NA	1052	NA	c3_645_1J1
c3_645_8H1	c3	MARCHEVAL	645	8	H	Switzerland	Eschikon field station	04.07.2016	2016	Input (Bayer, 06.04.2016); Aviator Xpro (Bayer, 25.05.2016); Osiris (06.06.2016)	NA	NA	1475	NA	c3_645_8H1
c3_645_8H2	c3	MARCHEVAL	645	8	H	Switzerland	Eschikon field station	04.07.2016	2016	Input (Bayer, 06.04.2016); Aviator Xpro (Bayer, 25.05.2016); Osiris (06.06.2016)	NA	NA	1459	NA	c3_645_8H2
c3_645_8H3	c3	MARCHEVAL	645	8	H	Switzerland	Eschikon field station	04.07.2016	2016	Input (Bayer, 06.04.2016); Aviator Xpro (Bayer, 25.05.2016); Osiris (06.06.2016)	NA	NA	1475	NA	c3_645_8H3
c3_645_8J1	c3	MARCHEVAL	645	8	J	Switzerland	Eschikon field station	04.07.2016	2016	Input (Bayer, 06.04.2016); Aviator Xpro (Bayer, 25.05.2016); Osiris (06.06.2016)	NA	NA	32	NA	c3_645_8J1
c3_645_8J2	c3	MARCHEVAL	645	8	J	Switzerland	Eschikon field station	04.07.2016	2016	Input (Bayer, 06.04.2016); Aviator Xpro (Bayer, 25.05.2016); Osiris (06.06.2016)	NA	NA	256	NA	c3_645_8J2
c3_708_16H2	c3	CASSIOPEIA	708	16	H	Switzerland	Eschikon field station	04.07.2016	2016	Input (Bayer, 06.04.2016); Aviator Xpro (Bayer, 25.05.2016); Osiris (06.06.2016)	NA	NA	450	NA	c3_708_16H2
c3_708_16J1	c3	CASSIOPEIA	708	16	J	Switzerland	Eschikon field station	04.07.2016	2016	Input (Bayer, 06.04.2016); Aviator Xpro (Bayer, 25.05.2016); Osiris (06.06.2016)	NA	NA	747	NA	c3_708_16J1
c3_708_16J2	c3	CASSIOPEIA	708	16	J	Switzerland	Eschikon field station	04.07.2016	2016	Input (Bayer, 06.04.2016); Aviator Xpro (Bayer, 25.05.2016); Osiris (06.06.2016)	NA	NA	1261	NA	c3_708_16J2
c3_709_10B1	c3	SIMANO	709	10	B	Switzerland	Eschikon field station	04.07.2016	2016	Input (Bayer, 06.04.2016); Aviator Xpro (Bayer, 25.05.2016); Osiris (06.06.2016)	NA	NA	918	NA	c3_709_10B1
c3_709_10B2	c3	SIMANO	709	10	B	Switzerland	Eschikon field station	04.07.2016	2016	Input (Bayer, 06.04.2016); Aviator Xpro (Bayer, 25.05.2016); Osiris (06.06.2016)	ST16CH_3V27	SRR10728671	937	YES	c3_709_10B2
c3_709_11A1	c3	SIMANO	709	11	A	Switzerland	Eschikon field station	04.07.2016	2016	Input (Bayer, 06.04.2016); Aviator Xpro (Bayer, 25.05.2016); Osiris (06.06.2016)	NA	NA	1139	YES	c3_709_11A1
c3_709_11A2	c3	SIMANO	709	11	A	Switzerland	Eschikon field station	04.07.2016	2016	Input (Bayer, 06.04.2016); Aviator Xpro (Bayer, 25.05.2016); Osiris (06.06.2016)	NA	NA	1138	NA	c3_709_11A2
c3_709_12A1	c3	SIMANO	709	12	A	Switzerland	Eschikon field station	04.07.2016	2016	Input (Bayer, 06.04.2016); Aviator Xpro (Bayer, 25.05.2016); Osiris (06.06.2016)	ST16CH_3V30	SRR10728670	1138	NA	c3_709_12A1
c3_709_13A1	c3	SIMANO	709	13	A	Switzerland	Eschikon field station	04.07.2016	2016	Input (Bayer, 06.04.2016); Aviator Xpro (Bayer, 25.05.2016); Osiris (06.06.2016)	NA	NA	1137	NA	c3_709_13A1
c3_709_13A2	c3	SIMANO	709	13	A	Switzerland	Eschikon field station	04.07.2016	2016	Input (Bayer, 06.04.2016); Aviator Xpro (Bayer, 25.05.2016); Osiris (06.06.2016)	NA	NA	162	NA	c3_709_13A2
c3_709_13A3	c3	SIMANO	709	13	A	Switzerland	Eschikon field station	04.07.2016	2016	Input (Bayer, 06.04.2016); Aviator Xpro (Bayer, 25.05.2016); Osiris (06.06.2016)	NA	NA	162	NA	c3_709_13A3
c3_709_14A3	c3	SIMANO	709	14	A	Switzerland	Eschikon field station	04.07.2016	2016	Input (Bayer, 06.04.2016); Aviator Xpro (Bayer, 25.05.2016); Osiris (06.06.2016)	NA	NA	1138	NA	c3_709_14A3
c3_709_16A1	c3	SIMANO	709	16	A	Switzerland	Eschikon field station	04.07.2016	2016	Input (Bayer, 06.04.2016); Aviator Xpro (Bayer, 25.05.2016); Osiris (06.06.2016)	ST16CH_3V43	SRR10728668	449	NA	c3_709_16A1
c3_709_16A2	c3	SIMANO	709	16	A	Switzerland	Eschikon field station	04.07.2016	2016	Input (Bayer, 06.04.2016); Aviator Xpro (Bayer, 25.05.2016); Osiris (06.06.2016)	NA	NA	996	NA	c3_709_16A2
c3_709_16A3	c3	SIMANO	709	16	A	Switzerland	Eschikon field station	04.07.2016	2016	Input (Bayer, 06.04.2016); Aviator Xpro (Bayer, 25.05.2016); Osiris (06.06.2016)	NA	NA	222	YES	c3_709_16A3
c3_709_1A1	c3	SIMANO	709	1	A	Switzerland	Eschikon field station	04.07.2016	2016	Input (Bayer, 06.04.2016); Aviator Xpro (Bayer, 25.05.2016); Osiris (06.06.2016)	NA	NA	1341	YES	c3_709_1A1
c3_709_1A2	c3	SIMANO	709	1	A	Switzerland	Eschikon field station	04.07.2016	2016	Input (Bayer, 06.04.2016); Aviator Xpro (Bayer, 25.05.2016); Osiris (06.06.2016)	NA	NA	1273	NA	c3_709_1A2
c3_709_1A3	c3	SIMANO	709	1	A	Switzerland	Eschikon field station	04.07.2016	2016	Input (Bayer, 06.04.2016); Aviator Xpro (Bayer, 25.05.2016); Osiris (06.06.2016)	NA	NA	1273	NA	c3_709_1A3
c3_709_1B1	c3	SIMANO	709	1	B	Switzerland	Eschikon field station	04.07.2016	2016	Input (Bayer, 06.04.2016); Aviator Xpro (Bayer, 25.05.2016); Osiris (06.06.2016)	NA	NA	1109	YES	c3_709_1B1
c3_709_2A3	c3	SIMANO	709	2	A	Switzerland	Eschikon field station	04.07.2016	2016	Input (Bayer, 06.04.2016); Aviator Xpro (Bayer, 25.05.2016); Osiris (06.06.2016)	NA	NA	1537	YES	c3_709_2A3
c3_709_3A1	c3	SIMANO	709	3	A	Switzerland	Eschikon field station	04.07.2016	2016	Input (Bayer, 06.04.2016); Aviator Xpro (Bayer, 25.05.2016); Osiris (06.06.2016)	NA	NA	1138	NA	c3_709_3A1
c3_709_3A2	c3	SIMANO	709	3	A	Switzerland	Eschikon field station	04.07.2016	2016	Input (Bayer, 06.04.2016); Aviator Xpro (Bayer, 25.05.2016); Osiris (06.06.2016)	ST16CH_3V10	SRR10728672	1138	NA	c3_709_3A2
c3_709_4B2	c3	SIMANO	709	4	B	Switzerland	Eschikon field station	04.07.2016	2016	Input (Bayer, 06.04.2016); Aviator Xpro (Bayer, 25.05.2016); Osiris (06.06.2016)	NA	NA	1107	NA	c3_709_4B2
c3_709_6A1	c3	SIMANO	709	6	A	Switzerland	Eschikon field station	04.07.2016	2016	Input (Bayer, 06.04.2016); Aviator Xpro (Bayer, 25.05.2016); Osiris (06.06.2016)	NA	NA	892	YES	c3_709_6A1
c3_709_6B1	c3	SIMANO	709	6	B	Switzerland	Eschikon field station	04.07.2016	2016	Input (Bayer, 06.04.2016); Aviator Xpro (Bayer, 25.05.2016); Osiris (06.06.2016)	NA	NA	847	NA	c3_709_6B1
c3_709_7A1	c3	SIMANO	709	7	A	Switzerland	Eschikon field station	04.07.2016	2016	Input (Bayer, 06.04.2016); Aviator Xpro (Bayer, 25.05.2016); Osiris (06.06.2016)	NA	NA	321	YES	c3_709_7A1
c3_709_7B1	c3	SIMANO	709	7	B	Switzerland	Eschikon field station	04.07.2016	2016	Input (Bayer, 06.04.2016); Aviator Xpro (Bayer, 25.05.2016); Osiris (06.06.2016)	NA	NA	1345	YES	c3_709_7B1
c3_709_7B3	c3	SIMANO	709	7	B	Switzerland	Eschikon field station	04.07.2016	2016	Input (Bayer, 06.04.2016); Aviator Xpro (Bayer, 25.05.2016); Osiris (06.06.2016)	NA	NA	54	YES	c3_709_7B3
c3_709_8A1	c3	SIMANO	709	8	A	Switzerland	Eschikon field station	04.07.2016	2016	Input (Bayer, 06.04.2016); Aviator Xpro (Bayer, 25.05.2016); Osiris (06.06.2016)	NA	NA	1138	NA	c3_709_8A1
c3_709_8A3	c3	SIMANO	709	8	A	Switzerland	Eschikon field station	04.07.2016	2016	Input (Bayer, 06.04.2016); Aviator Xpro (Bayer, 25.05.2016); Osiris (06.06.2016)	NA	NA	996	NA	c3_709_8A3
c3_709_8B1	c3	SIMANO	709	8	B	Switzerland	Eschikon field station	04.07.2016	2016	Input (Bayer, 06.04.2016); Aviator Xpro (Bayer, 25.05.2016); Osiris (06.06.2016)	NA	NA	228	NA	c3_709_8B1
c3_709_8B3	c3	SIMANO	709	8	B	Switzerland	Eschikon field station	04.07.2016	2016	Input (Bayer, 06.04.2016); Aviator Xpro (Bayer, 25.05.2016); Osiris (06.06.2016)	NA	NA	228	NA	c3_709_8B3
c3_724_16B1	c3	TITLIS	724	16	B	Switzerland	Eschikon field station	04.07.2016	2016	Input (Bayer, 06.04.2016); Aviator Xpro (Bayer, 25.05.2016); Osiris (06.06.2016)	ST16CH_3W21	SRR10728667	227	YES	c3_724_16B1
c3_724_16B2	c3	TITLIS	724	16	B	Switzerland	Eschikon field station	04.07.2016	2016	Input (Bayer, 06.04.2016); Aviator Xpro (Bayer, 25.05.2016); Osiris (06.06.2016)	NA	NA	205	YES	c3_724_16B2
c3_724_2B1	c3	TITLIS	724	2	B	Switzerland	Eschikon field station	04.07.2016	2016	Input (Bayer, 06.04.2016); Aviator Xpro (Bayer, 25.05.2016); Osiris (06.06.2016)	NA	NA	1568	YES	c3_724_2B1
c3_724_2B2	c3	TITLIS	724	2	B	Switzerland	Eschikon field station	04.07.2016	2016	Input (Bayer, 06.04.2016); Aviator Xpro (Bayer, 25.05.2016); Osiris (06.06.2016)	NA	NA	1569	NA	c3_724_2B2
c3_724_2B3	c3	TITLIS	724	2	B	Switzerland	Eschikon field station	04.07.2016	2016	Input (Bayer, 06.04.2016); Aviator Xpro (Bayer, 25.05.2016); Osiris (06.06.2016)	ST16CH_3W3	SRR10728666	1569	YES	c3_724_2B3
c3_724_8A1	c3	TITLIS	724	8	A	Switzerland	Eschikon field station	04.07.2016	2016	Input (Bayer, 06.04.2016); Aviator Xpro (Bayer, 25.05.2016); Osiris (06.06.2016)	NA	NA	436	YES	c3_724_8A1
c3_724_8A2	c3	TITLIS	724	8	A	Switzerland	Eschikon field station	04.07.2016	2016	Input (Bayer, 06.04.2016); Aviator Xpro (Bayer, 25.05.2016); Osiris (06.06.2016)	NA	NA	1275	YES	c3_724_8A2
c3_724_8B1	c3	TITLIS	724	8	B	Switzerland	Eschikon field station	04.07.2016	2016	Input (Bayer, 06.04.2016); Aviator Xpro (Bayer, 25.05.2016); Osiris (06.06.2016)	NA	NA	22	YES	c3_724_8B1
c3_724_8B2	c3	TITLIS	724	8	B	Switzerland	Eschikon field station	04.07.2016	2016	Input (Bayer, 06.04.2016); Aviator Xpro (Bayer, 25.05.2016); Osiris (06.06.2016)	NA	NA	19	YES	c3_724_8B2
c3_724_8B3	c3	TITLIS	724	8	B	Switzerland	Eschikon field station	04.07.2016	2016	Input (Bayer, 06.04.2016); Aviator Xpro (Bayer, 25.05.2016); Osiris (06.06.2016)	NA	NA	21	NA	c3_724_8B3
c3_85_11A1	c3	ARINA	85	11	A	Switzerland	Eschikon field station	04.07.2016	2016	Input (Bayer, 06.04.2016); Aviator Xpro (Bayer, 25.05.2016); Osiris (06.06.2016)	ST16CH_3F4	SRR10728723	1235	YES	c3_85_11A1
c3_85_11B1	c3	ARINA	85	11	B	Switzerland	Eschikon field station	04.07.2016	2016	Input (Bayer, 06.04.2016); Aviator Xpro (Bayer, 25.05.2016); Osiris (06.06.2016)	NA	NA	245	YES	c3_85_11B1
c3_85_11B2	c3	ARINA	85	11	B	Switzerland	Eschikon field station	04.07.2016	2016	Input (Bayer, 06.04.2016); Aviator Xpro (Bayer, 25.05.2016); Osiris (06.06.2016)	NA	NA	233	YES	c3_85_11B2
c3_85_11B3	c3	ARINA	85	11	B	Switzerland	Eschikon field station	04.07.2016	2016	Input (Bayer, 06.04.2016); Aviator Xpro (Bayer, 25.05.2016); Osiris (06.06.2016)	ST16CH_3F7	SRR10728722	111	YES	c3_85_11B3
c3_85_13A1	c3	ARINA	85	13	A	Switzerland	Eschikon field station	04.07.2016	2016	Input (Bayer, 06.04.2016); Aviator Xpro (Bayer, 25.05.2016); Osiris (06.06.2016)	NA	NA	1238	YES	c3_85_13A1
c3_85_13A2	c3	ARINA	85	13	A	Switzerland	Eschikon field station	04.07.2016	2016	Input (Bayer, 06.04.2016); Aviator Xpro (Bayer, 25.05.2016); Osiris (06.06.2016)	ST16CH_3F9	SRR10728721	672	YES	c3_85_13A2
c3_85_13A3	c3	ARINA	85	13	A	Switzerland	Eschikon field station	04.07.2016	2016	Input (Bayer, 06.04.2016); Aviator Xpro (Bayer, 25.05.2016); Osiris (06.06.2016)	NA	NA	1239	NA	c3_85_13A3
c3_85_2B1	c3	ARINA	85	2	B	Switzerland	Eschikon field station	04.07.2016	2016	Input (Bayer, 06.04.2016); Aviator Xpro (Bayer, 25.05.2016); Osiris (06.06.2016)	NA	NA	1009	NA	c3_85_2B1
c3_85_2B2	c3	ARINA	85	2	B	Switzerland	Eschikon field station	04.07.2016	2016	Input (Bayer, 06.04.2016); Aviator Xpro (Bayer, 25.05.2016); Osiris (06.06.2016)	ST16CH_3F2	SRR10728725	865	YES	c3_85_2B2
c3_85_2B3	c3	ARINA	85	2	B	Switzerland	Eschikon field station	04.07.2016	2016	Input (Bayer, 06.04.2016); Aviator Xpro (Bayer, 25.05.2016); Osiris (06.06.2016)	NA	NA	1483	YES	c3_85_2B3
c3_85_9K1	c3	ARINA	85	9	K	Switzerland	Eschikon field station	04.07.2016	2016	Input (Bayer, 06.04.2016); Aviator Xpro (Bayer, 25.05.2016); Osiris (06.06.2016)	NA	NA	441	YES	c3_85_9K1
